# Supplementary material for: Novel insights into the transcriptomic changes of the hypothalamus in broilers exposed to high-density stocking
Source: Research Square preprint supplement (doi:10.21203/rs.3.rs-7091754/v1), 2025-07-16
Supplement: Supplementary file 1 [file 7b6d498e4dfc76b9a6eb147a.xlsx]

## Sheet: Table 1. Quality tests
Groups	Raw reads no.	Clean reads no.	Clean reads (%)	Q20 (%)	Q30 (%)	Total mapped	Uniquely mapped	Mapped to gene
ND-HD (21d)	48389088	44912074	92.81	97.45	93.29	42050348 (93.63%)	41322541 (98.27%)	34115060 (82.56%)
ND-HD (21d)	48994008	45564066	92.99	97.34	93.04	42596263 (93.49%)	41864608 (98.28%)	34520753 (82.46%)
ND-HD (21d)	48348826	45093621	93.27	97.81	93.88	42412452 (93.09%)	41564323 (97.48%)	34345218 (83.24%)
ND-HD (21d)	43985710	40875964	92.93	97.42	93.2	38288316 (93.67%)	37627689 (98.27%)	31170810 (82.84%)
ND-HD (28d)	47366346	47366346	93.3	97.44	93.26	41389059 (93.65%)	41389059 (93.65%)	33656334 (82.74%)
ND-HD (28d)	42767316	39835024	93.14	97.47	93.32	37291875 (93.62%)	36646150 (98.27%)	30063504 (82.04%)
ND-HD (28d)	45782235	42898372	93.7	96.99	92.67	41425432 (93.19%)	40098921 (98.21%)	35212356 (82.66%)
ND-HD (28d)	47232145	43921214	92.99	97.09	94.14	43112312 (93.98%)	400221231 (97.27%)	36237177 (87.22%)
ND-HD (35d)	44564552	44564552	93.45	97.34	93	39044213 (93.75%)	38366011 (98.26%)	31528051 (82.18%)
ND-HD (35d)	46079942	46079942	93.55	97.42	93.21	40353021 (93.61%)	39660727 (98.28%)	32737328 (82.54%)
ND-HD (35d)	46763521	43998233	94.09	98.01	93.88	42621286 (94.24%)	42223192 (97.55%)	35342341 (83.51%)
ND-HD (35d)	47023349	43983417	93.54	98.11	94.45	41223891 (94.68%)	39982718 (98.21%)	35998256 (83.66%)
ND-HD (42d)	41886498	39184490	93.54	97.32	97.32	39672182 (93.59%)	36032989 (98.26%)	32761024 (82.59%)
ND-HD (42d)	45732935	42882644	93.77	95.52	91.89	43000921 (93.60%)	40821231 (97.11%)	36139842 (87.56%)
ND-HD (42d)	48837940	45473378	93.11	97.51	93.45	43187211 (94.28%)	41757086 (98.15%)	36233334 (87.44%)
ND-HD (42d)	44534156	41523336	93.23	97.36	93.11	38772082 (93.37%)	38086003 (98.23%)	31311189 (82.21%)

## Sheet: Table 2. 21d data
id	baseMean	baseMean_d21_L	baseMean_d21_H	foldChange(d21_H/d21_L)(d21_H/d21_L)	log2FoldChange	pval	padj	Regulation	Chromosome	Start Site	End Site	Direction	Length	Name	GO	KEGG	EC	eggNOG Class	eggNOG	Description	Entrez_geneID	UniProtAC	BP	CC	MF	Pathway
ENSGALG00000029788	1187.37	1454.74	920.001	0.632418	-0.661049	2.84019e-09	4.54146e-05	Nodiff	2	43773646	43778740	-	1097	CCK	GO:0005179;GO:0005576;GO:0051428;	K05226	-	-	-	cholecystokinin [Source:NCBI gene;Acc:414884]	414884	Q9PU41;A0A023UDZ9	-	GO:0005576//extracellular region;	GO:0005179//hormone activity;GO:0051428//peptide hormone receptor binding;	ko04972(Pancreatic secretion);ko04911(Insulin secretion);ko04080(Neuroactive ligand-receptor interaction)
ENSGALG00000004631	432.837	536.59	329.083	0.613287	-0.705366	1.91687e-07	0.00153254	Nodiff	21	5646905	5658909	-	1990	DRAXIN	GO:0005576;GO:0005576;GO:0005576;GO:0005576;GO:0005576;GO:0007411;GO:0007411;GO:0007411;GO:0007411;GO:0007411;GO:0010977;GO:0016055;GO:0016055;GO:0021516;GO:0021516;GO:0021516;GO:0021528;GO:0021528;GO:0021528;GO:0021960;GO:0030517;GO:0030900;GO:0030900;GO:0030900;GO:0043524;GO:0090090;GO:0090090;	K25511	-	T;M	2QUE0;39U1Y;3BGR4;3CX35;48037;49750;4GNQ9	dorsal inhibitory axon guidance protein [Source:NCBI gene;Acc:419492]	419492	B6ZI38	GO:0007411//axon guidance;GO:0007411//axon guidance;GO:0007411//axon guidance;GO:0007411//axon guidance;GO:0007411//axon guidance;GO:0010977//negative regulation of neuron projection development;GO:0016055//Wnt signaling pathway;GO:0016055//Wnt signaling pathway;GO:0021516//dorsal spinal cord development;GO:0021516//dorsal spinal cord development;GO:0021516//dorsal spinal cord development;GO:0021…	GO:0005576//extracellular region;GO:0005576//extracellular region;GO:0005576//extracellular region;GO:0005576//extracellular region;GO:0005576//extracellular region;	-	-
ENSGALG00000050634	691.296	841.628	540.964	0.642759	-0.63765	4.53739e-07	0.00241843	Nodiff	32	594320	602481	+	3007	-	GO:0004497;GO:0005506;GO:0016705;GO:0020037;GO:0004497;GO:0005506;GO:0016705;GO:0016712;GO:0020037;	-	-	-	-	cytochrome P450 2G1-like [Source:NCBI gene;Acc:112530469]	-	-	-	-	GO:0004497//monooxygenase activity;GO:0005506//iron ion binding;GO:0016705//oxidoreductase activity, acting on paired donors, with incorporation or reduction of molecular oxygen;GO:0020037//heme binding;GO:0004497//monooxygenase activity;GO:0005506//iron ion binding;GO:0016705//oxidoreductase activity, acting on paired donors, with incorporation or reduction of molecular oxygen;GO:0016712//oxidor…	-
ENSGALG00000012522	1928.97	1553.92	2304.01	1.48271	0.56824	1.03476e-06	0.0034045	Nodiff	1	51608164	51618692	+	2678	PVALB	GO:0005509;GO:0005737;GO:0030424;GO:0005509;GO:0005509;	K23926	-	Z;D;T	KOG0027;3A3IJ;3BRMH;3D8C1;48FBW;49C25;4GV7T	parvalbumin [Source:NCBI gene;Acc:396459]	396459	C1L370	-	GO:0005737//cytoplasm;GO:0030424//axon;	GO:0005509//calcium ion binding;GO:0005509//calcium ion binding;GO:0005509//calcium ion binding;	-
ENSGALG00000012254	108.938	148.756	69.1202	0.464656	-1.10577	1.29708e-06	0.0034045	Down Regulation	1	50905908	50917205	+	2772	KCNJ4	GO:0005242;GO:0006813;GO:0016020;GO:0016021;GO:0016323;GO:0030165;	-	-	P	KOG3827;38BXT;3BA68;3CTV5;487CT;48WGG;4GHDQ	Potassium inwardly rectifying channel subfamily J member 4 [Source:NCBI gene;Acc:395903]	-	-	GO:0006813//potassium ion transport;	GO:0016020//membrane;GO:0016021//integral component of membrane;GO:0016323//basolateral plasma membrane;	GO:0005242//inward rectifier potassium channel activity;GO:0030165//PDZ domain binding;	-
ENSGALG00000003839	364.021	521.362	206.68	0.396423	-1.33489	1.47466e-06	0.0034045	Down Regulation	12	3314049	3319671	+	2767	GRM2	GO:0004930;GO:0007186;GO:0016021;	-	-	M;T	KOG1056;38C5P;3B9DN;3CU4N;47YW3;496JY;4GKDB	glutamate metabotropic receptor 2 [Source:NCBI gene;Acc:427575]	-	-	GO:0007186//G protein-coupled receptor signaling pathway;	GO:0016021//integral component of membrane;	GO:0004930//G protein-coupled receptor activity;	-
ENSGALG00000018942	936.166	1084.48	787.856	0.726486	-0.460994	1.4904e-06	0.0034045	Nodiff	24	328157	329913	-	376	NRGN	GO:0005515;GO:0005516;	-	-	S	2S6YP;3A6Z4;3BTRB;3D9RC;48FNW;49C9J;4GVK2	neurogranin (protein kinase C substrate, RC3) [Source:NCBI gene;Acc:100859517]	100859517	F1NUV4	-	-	GO:0005515//protein binding;GO:0005516//calmodulin binding;	-
ENSGALG00000012542	421.031	496.996	345.067	0.694305	-0.526358	7.90524e-06	0.0146564	Nodiff	1	52034440	52042836	-	3212	RASD2	GO:0001963;GO:0003924;GO:0005525;GO:0007626;GO:0031681;	K07844	-	I;U;G;S	KOG0395;38HMX;3BHJJ;3D3CW;48AZV;48XX8;4GK6Z	RASD family member 2 [Source:NCBI gene;Acc:418057]	418057	F1NCA3	GO:0001963//synaptic transmission, dopaminergic;GO:0007626//locomotory behavior;	-	GO:0003924//GTPase activity;GO:0005525//GTP binding;GO:0031681//G-protein beta-subunit binding;	-
ENSGALG00000006473	761.092	879.231	642.953	0.731268	-0.451527	8.77923e-06	0.0146564	Nodiff	1	2887148	3334587	+	7450	PLXNA4	GO:0002116;GO:0005515;GO:0005886;GO:0005887;GO:0007162;GO:0007165;GO:0007165;GO:0007399;GO:0007411;GO:0008045;GO:0008360;GO:0016020;GO:0016021;GO:0017154;GO:0017154;GO:0017154;GO:0017154;GO:0021602;GO:0021610;GO:0021612;GO:0021615;GO:0021636;GO:0021637;GO:0021644;GO:0021784;GO:0021785;GO:0021793;GO:0021960;GO:0030334;GO:0035050;GO:0043087;GO:0048485;GO:0048812;GO:0048841;GO:0050772;GO:0050923;GO:…	-	-	B;T;Q	KOG3610;38DZI;3B9A7;3CS6M;4806H;48XQH;4GSKS	plexin A4 [Source:HGNC Symbol;Acc:HGNC:9102]	-	-	GO:0007162//negative regulation of cell adhesion;GO:0007165//signal transduction;GO:0007165//signal transduction;GO:0007399//nervous system development;GO:0007411//axon guidance;GO:0008045//motor neuron axon guidance;GO:0008360//regulation of cell shape;GO:0021602//cranial nerve morphogenesis;GO:0021610//facial nerve morphogenesis;GO:0021612//facial nerve structural organization;GO:0021615//gloss…	GO:0002116//semaphorin receptor complex;GO:0005886//plasma membrane;GO:0005887//integral component of plasma membrane;GO:0016020//membrane;GO:0016021//integral component of membrane;GO:0110165//cellular anatomical entity;	GO:0005515//protein binding;GO:0017154//semaphorin receptor activity;GO:0017154//semaphorin receptor activity;GO:0017154//semaphorin receptor activity;GO:0017154//semaphorin receptor activity;	-
ENSGALG00000000507	586.413	774.033	398.793	0.515215	-0.956754	9.16601e-06	0.0146564	Nodiff	11	18738378	18745111	+	1719	CPNE7	GO:0005634;GO:0005737;GO:0005886;GO:0071277;	-	-	T;U	KOG1327;38BYU;3B953;3D293;48268;491CX;4GKGE	copine VII [Source:NCBI gene;Acc:415851]	-	-	GO:0071277//cellular response to calcium ion;	GO:0005634//nucleus;GO:0005737//cytoplasm;GO:0005886//plasma membrane;	-	-
ENSGALG00000032980	625.691	738.055	513.328	0.695515	-0.523847	1.7614e-05	0.0256043	Nodiff	23	4578052	4585150	+	3506	DLGAP3	GO:0001540;GO:0023052;GO:0031594;GO:0045202;GO:0098978;GO:0098981;GO:0099563;GO:0099572;	-	-	-	-	DLG associated protein 3 [Source:NCBI gene;Acc:419638]	419638	A0A1D5PFI6	GO:0023052//signaling;GO:0099563//modification of synaptic structure;	GO:0031594//neuromuscular junction;GO:0045202//synapse;GO:0098978//glutamatergic synapse;GO:0098981//cholinergic synapse;GO:0099572//postsynaptic specialization;	GO:0001540//amyloid-beta binding;	-
ENSGALG00000009601	8818.79	9801.82	7835.76	0.799418	-0.322977	3.51073e-05	0.0467805	Nodiff	1	30463434	30606675	-	3347	NELL2	GO:0005509;GO:0005515;GO:0005509;GO:0005515;	K24342	-	O;T	KOG1217;38BS5;3BCIF;3CRM1;48751;48YWX;4GHDT	neural EGFL like 2 [Source:NCBI gene;Acc:417799]	417799	Q90827	-	-	GO:0005509//calcium ion binding;GO:0005515//protein binding;GO:0005509//calcium ion binding;GO:0005515//protein binding;	-
ENSGALG00000002223	367.675	450.172	285.177	0.633485	-0.658617	4.91061e-05	0.0604005	Nodiff	8	2669865	2680557	-	1939	LHX9	GO:0000981;GO:0003677;GO:0006355;GO:0008283;GO:0008584;GO:0008585;GO:0035262;GO:1990837;GO:0000981;GO:0003677;GO:0006355;	K09373	-	K	KOG0490;38BZF;3BD2S;3CTZ6;480VH;492MP;4GPS6	LIM homeobox 9 [Source:NCBI gene;Acc:396397]	396397	Q90881	GO:0006355//regulation of transcription, DNA-templated;GO:0008283//cell population proliferation;GO:0008584//male gonad development;GO:0008585//female gonad development;GO:0035262//gonad morphogenesis;GO:0006355//regulation of transcription, DNA-templated;	-	GO:0000981//DNA-binding transcription factor activity, RNA polymerase II-specific;GO:0003677//DNA binding;GO:1990837//sequence-specific double-stranded DNA binding;GO:0000981//DNA-binding transcription factor activity, RNA polymerase II-specific;GO:0003677//DNA binding;	-
ENSGALG00000017411	268.343	321.289	215.398	0.670418	-0.576866	7.69547e-05	0.0878932	Nodiff	Z	10315034	10316374	+	1341	-	GO:0004930;GO:0007186;GO:0008528;GO:0016021;GO:0051482;	K08397	-	-	-	relaxin/insulin like family peptide receptor 3 [Source:NCBI gene;Acc:431664]	431664	A0A1L1RP43	GO:0007186//G protein-coupled receptor signaling pathway;GO:0051482//positive regulation of cytosolic calcium ion concentration involved in phospholipase C-activating G protein-coupled signaling pathway;	GO:0016021//integral component of membrane;	GO:0004930//G protein-coupled receptor activity;GO:0008528//G protein-coupled peptide receptor activity;	ko04926(Relaxin signaling pathway);ko04080(Neuroactive ligand-receptor interaction)
ENSGALG00000007070	188.442	149.206	227.677	1.52592	0.609682	8.4928e-05	0.0905333	Nodiff	14	9166630	9185734	+	2864	-	GO:0007160;GO:0009986;GO:0016020;GO:0110165;	K25029	-	-	-	-	416624	-	GO:0007160//cell-matrix adhesion;	GO:0009986//cell surface;GO:0016020//membrane;GO:0110165//cellular anatomical entity;	-	-
ENSGALG00000037953	10101.2	11382.6	8819.88	0.774859	-0.367994	9.72992e-05	0.0947769	Nodiff	33	7117397	7121192	+	1609	TUBA1A	GO:0003924;GO:0005200;GO:0005525;GO:0005874;GO:0005874;GO:0005881;GO:0007017;GO:0015630;GO:0031594;GO:0036464;GO:0042802;GO:0050807;GO:0055037;	K07374	-	-	-	tubulin alpha 1a [Source:NCBI gene;Acc:429035]	100859737	-	GO:0007017//microtubule-based process;GO:0050807//regulation of synapse organization;	GO:0005874//microtubule;GO:0005874//microtubule;GO:0005881//cytoplasmic microtubule;GO:0015630//microtubule cytoskeleton;GO:0031594//neuromuscular junction;GO:0036464//cytoplasmic ribonucleoprotein granule;GO:0055037//recycling endosome;	GO:0003924//GTPase activity;GO:0005200//structural constituent of cytoskeleton;GO:0005525//GTP binding;GO:0042802//identical protein binding;	ko05132(Salmonella infection);ko05130(Pathogenic Escherichia coli infection);ko05022(Pathways of neurodegeneration - multiple diseases);ko05020(Prion disease);ko05016(Huntington disease);ko05014(Amyotrophic lateral sclerosis);ko05012(Parkinson disease);ko05010(Alzheimer disease);ko04540(Gap junction);ko04530(Tight junction);ko04210(Apoptosis);ko04145(Phagosome)
ENSGALG00000003842	70.7004	92.3789	49.0219	0.530661	-0.914136	0.000100763	0.0947769	Nodiff	20	5042743	5050245	-	1669	GHRH	GO:0005179;GO:0005576;	-	-	T;S	2S2N6;3A7EZ;3BST7;3D8DW;48F9A;49B3W;4GRQ9	growth hormone releasing hormone [Source:NCBI gene;Acc:419178]	419178	Q1KNA7	-	GO:0005576//extracellular region;	GO:0005179//hormone activity;	-
ENSGALG00000010200	379.498	448.697	310.3	0.691558	-0.532077	0.000122876	0.109155	Nodiff	1	36736396	36951463	+	3809	TRHDE	GO:0004177;GO:0006508;GO:0008237;GO:0008270;GO:0016020;	K01306	EC:3.4.19.6	E;O	KOG1046;38CFG;3BD0T;3CUKR;480FP;490Q0;4GTF3	thyrotropin releasing hormone degrading enzyme [Source:NCBI gene;Acc:427868]	427868	-	GO:0006508//proteolysis;	GO:0016020//membrane;	GO:0004177//aminopeptidase activity;GO:0008237//metallopeptidase activity;GO:0008270//zinc ion binding;	-
ENSGALG00000014922	1373.95	1212.3	1535.6	1.26668	0.341054	0.000136194	0.114618	Nodiff	2	102170492	102246911	-	4946	ROCK1	GO:0004672;GO:0004674;GO:0005524;GO:0006468;GO:0007165;GO:0007266;GO:0030036;GO:0031267;GO:0035556;GO:0001726;GO:0001837;GO:0003383;GO:0004672;GO:0004674;GO:0004674;GO:0005524;GO:0005856;GO:0005886;GO:0006468;GO:0006468;GO:0007159;GO:0007165;GO:0007249;GO:0007266;GO:0007266;GO:0010494;GO:0010508;GO:0010613;GO:0010628;GO:0010922;GO:0016525;GO:0018105;GO:0019828;GO:0022614;GO:0030027;GO:0030036;GO:…	K04514	EC:2.7.11.1	T;L;K	KOG0612;38BFH;3BATS;3CXFD;47Z00;496WY;4GR4T	Rho-associated, coiled-coil containing protein kinase 1 [Source:NCBI gene;Acc:373970]	373970	F1NRH6	GO:0006468//protein phosphorylation;GO:0007165//signal transduction;GO:0007266//Rho protein signal transduction;GO:0030036//actin cytoskeleton organization;GO:0035556//intracellular signal transduction;GO:0001837//epithelial to mesenchymal transition;GO:0003383//apical constriction;GO:0006468//protein phosphorylation;GO:0006468//protein phosphorylation;GO:0007159//leukocyte cell-cell adhesion;GO:…	GO:0001726//ruffle;GO:0005856//cytoskeleton;GO:0005886//plasma membrane;GO:0010494//cytoplasmic stress granule;GO:0030027//lamellipodium;GO:0106003//amyloid-beta complex;	GO:0004672//protein kinase activity;GO:0004674//protein serine/threonine kinase activity;GO:0005524//ATP binding;GO:0031267//small GTPase binding;GO:0004672//protein kinase activity;GO:0004674//protein serine/threonine kinase activity;GO:0004674//protein serine/threonine kinase activity;GO:0005524//ATP binding;GO:0019828//aspartic-type endopeptidase inhibitor activity;GO:0031267//small GTPase bin…	ko05206(MicroRNAs in cancer);ko05205(Proteoglycans in cancer);ko05200(Pathways in cancer);ko05163(Human cytomegalovirus infection);ko05135(Yersinia infection);ko05131(Shigellosis);ko05130(Pathogenic Escherichia coli infection);ko04921(Oxytocin signaling pathway);ko04810(Regulation of actin cytoskeleton);ko04670(Leukocyte transendothelial migration);ko04611(Platelet activation);ko04530(Tight junct…
ENSGALG00000032060	157.768	191.733	123.803	0.645703	-0.631058	0.000150979	0.120707	Nodiff	21	629761	633043	+	2651	GPR153	GO:0004930;GO:0007186;GO:0016021;GO:0004930;GO:0007186;GO:0016021;GO:0004930;GO:0007186;GO:0016021;	-	-	-	-	G protein-coupled receptor 153 [Source:NCBI gene;Acc:100859891]	-	-	GO:0007186//G protein-coupled receptor signaling pathway;GO:0007186//G protein-coupled receptor signaling pathway;GO:0007186//G protein-coupled receptor signaling pathway;	GO:0016021//integral component of membrane;GO:0016021//integral component of membrane;GO:0016021//integral component of membrane;	GO:0004930//G protein-coupled receptor activity;GO:0004930//G protein-coupled receptor activity;GO:0004930//G protein-coupled receptor activity;	-
ENSGALG00000037402	335.962	391.278	280.647	0.717258	-0.479436	0.000175365	0.133528	Nodiff	3	57245588	57248925	+	2639	NOV	GO:0005515;GO:0005520;GO:0005576;GO:0007165;GO:0001502;GO:0001503;GO:0001525;GO:0001894;GO:0005178;GO:0005576;GO:0007160;GO:0007165;GO:0007229;GO:0008022;GO:0008201;GO:0008543;GO:0010629;GO:0016477;GO:0030154;GO:0030324;GO:0031012;GO:0032330;GO:0035988;GO:0045597;GO:0046330;GO:0051496;GO:0061448;GO:0070374;GO:0072593;GO:0005515;GO:0005520;GO:0005576;GO:0007165;	K06827	-	-	-	nephroblastoma overexpressed [Source:NCBI gene;Acc:374135]	374135	Q98TQ8	GO:0007165//signal transduction;GO:0001502//cartilage condensation;GO:0001503//ossification;GO:0001525//angiogenesis;GO:0001894//tissue homeostasis;GO:0007160//cell-matrix adhesion;GO:0007165//signal transduction;GO:0007229//integrin-mediated signaling pathway;GO:0008543//fibroblast growth factor receptor signaling pathway;GO:0010629//negative regulation of gene expression;GO:0016477//cell migrat…	GO:0005576//extracellular region;GO:0005576//extracellular region;GO:0031012//extracellular matrix;GO:0005576//extracellular region;	GO:0005515//protein binding;GO:0005520//insulin-like growth factor binding;GO:0005178//integrin binding;GO:0008022//protein C-terminus binding;GO:0008201//heparin binding;GO:0005515//protein binding;GO:0005520//insulin-like growth factor binding;	ko04390(Hippo signaling pathway);ko04371(Apelin signaling pathway)
ENSGALG00000011170	95.904	120.467	71.3408	0.592201	-0.755841	0.000209178	0.152034	Nodiff	2	33838517	33863336	+	1668	WIPF3	GO:0003779;GO:0003779;	-	-	O;Z;L	KOG4462;38HE5;3BM60;3CV2J;4890A;48V9J;4GV5A	WAS/WASL interacting protein family member 3 [Source:NCBI gene;Acc:420634]	-	-	-	-	GO:0003779//actin binding;GO:0003779//actin binding;	-
ENSGALG00000048923	855.679	960.183	751.175	0.782324	-0.354161	0.000223334	0.152375	Nodiff	28	3130618	3134178	-	2559	CBARP	GO:0044325;GO:1901386;GO:0044325;GO:1901386;	-	-	-	-	CACN beta subunit associated regulatory protein [Source:NCBI gene;Acc:100858130]	-	-	GO:1901386//negative regulation of voltage-gated calcium channel activity;GO:1901386//negative regulation of voltage-gated calcium channel activity;	-	GO:0044325//transmembrane transporter binding;GO:0044325//transmembrane transporter binding;	-
ENSGALG00000007077	782.728	683.215	882.241	1.29131	0.368832	0.000228706	0.152375	Nodiff	5	16814154	16844218	-	2653	CPT1A	GO:0001676;GO:0004095;GO:0004095;GO:0004095;GO:0004095;GO:0005739;GO:0005739;GO:0005739;GO:0005741;GO:0005741;GO:0006629;GO:0006631;GO:0006631;GO:0006635;GO:0009437;GO:0009437;GO:0016020;GO:0016021;GO:0016740;GO:0016746;GO:0016746;GO:0016746;GO:0030855;GO:1990698;	K08765	EC:2.3.1.21	I	KOG3716;3AN4Z;3BCUH;3CTF1;47Z11;48YBJ;4GITR	carnitine palmitoyltransferase 1A [Source:NCBI gene;Acc:423118]	423118	Q6B842	GO:0001676//long-chain fatty acid metabolic process;GO:0006629//lipid metabolic process;GO:0006631//fatty acid metabolic process;GO:0006631//fatty acid metabolic process;GO:0006635//fatty acid beta-oxidation;GO:0009437//carnitine metabolic process;GO:0009437//carnitine metabolic process;GO:0030855//epithelial cell differentiation;	GO:0005739//mitochondrion;GO:0005739//mitochondrion;GO:0005739//mitochondrion;GO:0005741//mitochondrial outer membrane;GO:0005741//mitochondrial outer membrane;GO:0016020//membrane;GO:0016021//integral component of membrane;	GO:0004095//carnitine O-palmitoyltransferase activity;GO:0004095//carnitine O-palmitoyltransferase activity;GO:0004095//carnitine O-palmitoyltransferase activity;GO:0004095//carnitine O-palmitoyltransferase activity;GO:0016740//transferase activity;GO:0016746//acyltransferase activity;GO:0016746//acyltransferase activity;GO:0016746//acyltransferase activity;GO:1990698//palmitoleoyltransferase act…	ko04936(Alcoholic liver disease);ko04931(Insulin resistance);ko04922(Glucagon signaling pathway);ko04920(Adipocytokine signaling pathway);ko04714(Thermogenesis);ko04152(AMPK signaling pathway);ko03320(PPAR signaling pathway);ko00071(Fatty acid degradation)
ENSGALG00000026431	3195.73	3525.26	2866.2	0.813047	-0.298589	0.000253146	0.161912	Nodiff	19	6058425	6064415	-	3299	SEZ6	GO:0005783;GO:0008344;GO:0021680;GO:0043025;GO:0043197;GO:0043198;GO:0048471;GO:0050773;GO:0060074;GO:0060079;GO:0090036;GO:0097440;	-	-	S;T	2QV56;39NQW;3CQ9A;3E6EP;48RX0;49NBF;4GQHT	seizure related 6 homolog [Source:NCBI gene;Acc:426388]	-	-	GO:0008344//adult locomotory behavior;GO:0021680//cerebellar Purkinje cell layer development;GO:0050773//regulation of dendrite development;GO:0060074//synapse maturation;GO:0060079//excitatory postsynaptic potential;GO:0090036//regulation of protein kinase C signaling;	GO:0005783//endoplasmic reticulum;GO:0043025//neuronal cell body;GO:0043197//dendritic spine;GO:0043198//dendritic shaft;GO:0048471//perinuclear region of cytoplasm;GO:0097440//apical dendrite;	-	-
ENSGALG00000020615	531.806	605.258	458.353	0.757286	-0.40109	0.000266483	0.163887	Nodiff	6	35838879	35863626	-	4338	STK32C	GO:0004672;GO:0005524;GO:0006468;GO:0004672;GO:0005524;GO:0006468;	K08793	EC:2.7.11.1	H;T	KOG0598;38GE3;3BCR1;3CST3;47Z2F;4907U;4GIV5	serine/threonine kinase 32C [Source:NCBI gene;Acc:769291]	769291	-	GO:0006468//protein phosphorylation;GO:0006468//protein phosphorylation;	-	GO:0004672//protein kinase activity;GO:0005524//ATP binding;GO:0004672//protein kinase activity;GO:0005524//ATP binding;	-
ENSGALG00000037148	214.516	253.34	175.692	0.693504	-0.528024	0.000321869	0.170794	Nodiff	2	115011152	115012145	-	794	CRH	GO:0001659;GO:0001963;GO:0004601;GO:0005179;GO:0005179;GO:0005576;GO:0005576;GO:0005576;GO:0005615;GO:0005615;GO:0005737;GO:0006704;GO:0006954;GO:0006954;GO:0007165;GO:0017045;GO:0017045;GO:0030324;GO:0030325;GO:0032099;GO:0032811;GO:0035641;GO:0043025;GO:0045202;GO:0051353;GO:0051461;GO:0051464;GO:0051464;GO:0070093;GO:0071625;GO:0072592;GO:0098869;GO:2000294;GO:2000310;GO:2000379;GO:2000852;GO:…	K05256	-	-	-	corticotropin releasing hormone [Source:NCBI gene;Acc:404297]	404297	Q703P0	GO:0001659//temperature homeostasis;GO:0001963//synaptic transmission, dopaminergic;GO:0006704//glucocorticoid biosynthetic process;GO:0006954//inflammatory response;GO:0006954//inflammatory response;GO:0007165//signal transduction;GO:0030324//lung development;GO:0030325//adrenal gland development;GO:0032099//negative regulation of appetite;GO:0032811//negative regulation of epinephrine secretion…	GO:0005576//extracellular region;GO:0005576//extracellular region;GO:0005576//extracellular region;GO:0005615//extracellular space;GO:0005615//extracellular space;GO:0005737//cytoplasm;GO:0043025//neuronal cell body;GO:0045202//synapse;	GO:0004601//peroxidase activity;GO:0005179//hormone activity;GO:0005179//hormone activity;GO:0017045//corticotropin-releasing hormone activity;GO:0017045//corticotropin-releasing hormone activity;	ko05034(Alcoholism);ko04934(Cushing syndrome);ko04730(Long-term depression);ko04080(Neuroactive ligand-receptor interaction);ko04024(cAMP signaling pathway)
ENSGALG00000047441	548.018	631.092	464.944	0.73673	-0.440792	0.000329484	0.170794	Nodiff	19	6449084	6453916	-	1137	TRARG1	GO:0005886;GO:0016021;GO:0030659;GO:0032869;GO:0044381;GO:0048471;GO:0072659;GO:0099500;GO:0099638;	-	-	-	-	tumor suppressor candidate 5 [Source:NCBI gene;Acc:107054804]	-	-	GO:0032869//cellular response to insulin stimulus;GO:0044381//glucose import in response to insulin stimulus;GO:0072659//protein localization to plasma membrane;GO:0099500//vesicle fusion to plasma membrane;GO:0099638//endosome to plasma membrane protein transport;	GO:0005886//plasma membrane;GO:0016021//integral component of membrane;GO:0030659//cytoplasmic vesicle membrane;GO:0048471//perinuclear region of cytoplasm;	-	-
ENSGALG00000009791	268.78	313.803	223.757	0.713049	-0.487926	0.000332625	0.170794	Nodiff	3	21385127	21421817	-	3324	PROX1	GO:0000122;GO:0000122;GO:0000976;GO:0000978;GO:0000981;GO:0001227;GO:0001709;GO:0001822;GO:0001889;GO:0001938;GO:0001945;GO:0001946;GO:0002088;GO:0002089;GO:0002194;GO:0003677;GO:0003677;GO:0005634;GO:0005634;GO:0005654;GO:0005737;GO:0005737;GO:0005829;GO:0006355;GO:0007420;GO:0007623;GO:0008284;GO:0008284;GO:0008285;GO:0008285;GO:0010468;GO:0010468;GO:0010595;GO:0016922;GO:0021542;GO:0021707;GO:…	K20211	-	K;S	KOG3779;3996N;3BJAS;3CT32;47Z45;48VW7;4GK3G	prospero homeobox 1 [Source:NCBI gene;Acc:395802]	395802	Q91018	GO:0000122//negative regulation of transcription by RNA polymerase II;GO:0000122//negative regulation of transcription by RNA polymerase II;GO:0001709//cell fate determination;GO:0001822//kidney development;GO:0001889//liver development;GO:0001938//positive regulation of endothelial cell proliferation;GO:0001945//lymph vessel development;GO:0001946//lymphangiogenesis;GO:0002088//lens development …	GO:0005634//nucleus;GO:0005634//nucleus;GO:0005654//nucleoplasm;GO:0005737//cytoplasm;GO:0005737//cytoplasm;GO:0005829//cytosol;	GO:0000976//transcription cis-regulatory region binding;GO:0000978//RNA polymerase II cis-regulatory region sequence-specific DNA binding;GO:0000981//DNA-binding transcription factor activity, RNA polymerase II-specific;GO:0001227//DNA-binding transcription repressor activity, RNA polymerase II-specific;GO:0003677//DNA binding;GO:0003677//DNA binding;GO:0016922//nuclear receptor binding;GO:004356…	ko04013(MAPK signaling pathway - fly)
ENSGALG00000038576	112.475	138.717	86.2337	0.621652	-0.685822	0.000337155	0.170794	Nodiff	13	12088961	12092118	+	1652	-	GO:0005515;	-	-	-	-	fibronectin type III domain containing 9 [Source:NCBI gene;Acc:100857510]	100857510	A0A1D5NYU1	-	-	GO:0005515//protein binding;	-
ENSGALG00000029621	572.497	647.899	497.095	0.767241	-0.382248	0.000358818	0.170794	Nodiff	12	3580056	3597490	+	3422	SEMA3F	GO:0005515;GO:0030215;GO:0005515;GO:0007411;GO:0030215;GO:0045499;GO:0005515;GO:0030215;	-	-	-	-	semaphorin 3F [Source:NCBI gene;Acc:374109]	-	-	GO:0007411//axon guidance;	-	GO:0005515//protein binding;GO:0030215//semaphorin receptor binding;GO:0005515//protein binding;GO:0030215//semaphorin receptor binding;GO:0045499//chemorepellent activity;GO:0005515//protein binding;GO:0030215//semaphorin receptor binding;	-
ENSGALG00000035717	1803.79	1994.23	1613.35	0.809006	-0.305777	0.000361573	0.170794	Nodiff	21	6542875	6568734	+	11937	HSPG2	GO:0005509;GO:0005515;GO:0008022;GO:0005509;GO:0005515;GO:0005509;GO:0005515;GO:0005509;GO:0005515;GO:0005509;GO:0005515;GO:0005509;GO:0005515;	K06255	-	-	-	heparan sulfate proteoglycan 2 [Source:NCBI gene;Acc:429806]	429806	-	-	-	GO:0005509//calcium ion binding;GO:0005515//protein binding;GO:0008022//protein C-terminus binding;GO:0005509//calcium ion binding;GO:0005515//protein binding;GO:0005509//calcium ion binding;GO:0005515//protein binding;GO:0005509//calcium ion binding;GO:0005515//protein binding;GO:0005509//calcium ion binding;GO:0005515//protein binding;GO:0005509//calcium ion binding;GO:0005515//protein binding;	ko05205(Proteoglycans in cancer);ko05161(Hepatitis B);ko04512(ECM-receptor interaction)
ENSGALG00000037740	129.158	97.8353	160.481	1.64031	0.713971	0.000369839	0.170794	Nodiff	4	54070856	54090538	+	1507	QRFPR	GO:0004930;GO:0004930;GO:0004983;GO:0007186;GO:0007186;GO:0016021;	K08378	-	-	-	pyroglutamylated RFamide peptide receptor [Source:NCBI gene;Acc:422671]	422671	B2CL09	GO:0007186//G protein-coupled receptor signaling pathway;GO:0007186//G protein-coupled receptor signaling pathway;	GO:0016021//integral component of membrane;	GO:0004930//G protein-coupled receptor activity;GO:0004930//G protein-coupled receptor activity;GO:0004983//neuropeptide Y receptor activity;	-
ENSGALG00000027053	444.322	364.424	524.22	1.43849	0.524557	0.000370951	0.170794	Nodiff	2	100257486	100276143	+	1150	AKAIN1	GO:0005829;GO:0008104;GO:0031333;GO:0051018;GO:0051018;	-	-	S	2SEI0;3A8W8;3BUFB;3DAVH;48GMK;49DIB;4GVR7	A-kinase anchor inhibitor 1 [Source:NCBI gene;Acc:769357]	769357	R4GI69	GO:0008104//protein localization;GO:0031333//negative regulation of protein-containing complex assembly;	GO:0005829//cytosol;	GO:0051018//protein kinase A binding;GO:0051018//protein kinase A binding;	-
ENSGALG00000040532	863.938	1048.97	678.905	0.647211	-0.627692	0.00038418	0.170794	Nodiff	9	12074565	12078458	+	2418	ZIC1	GO:0000977;GO:0000978;GO:0001228;GO:0003700;GO:0005634;GO:0005634;GO:0005654;GO:0005737;GO:0007389;GO:0007417;GO:0007420;GO:0007420;GO:0007628;GO:0008589;GO:0021510;GO:0042307;GO:0045893;GO:0045944;GO:1990837;	K09224	-	-	-	Zic family member 1 [Source:NCBI gene;Acc:374103]	374103	Q8JJC0	GO:0007389//pattern specification process;GO:0007417//central nervous system development;GO:0007420//brain development;GO:0007420//brain development;GO:0007628//adult walking behavior;GO:0008589//regulation of smoothened signaling pathway;GO:0021510//spinal cord development;GO:0042307//positive regulation of protein import into nucleus;GO:0045893//positive regulation of transcription, DNA-templat…	GO:0005634//nucleus;GO:0005634//nucleus;GO:0005654//nucleoplasm;GO:0005737//cytoplasm;	GO:0000977//RNA polymerase II transcription regulatory region sequence-specific DNA binding;GO:0000978//RNA polymerase II cis-regulatory region sequence-specific DNA binding;GO:0001228//DNA-binding transcription activator activity, RNA polymerase II-specific;GO:0003700//DNA-binding transcription factor activity;GO:1990837//sequence-specific double-stranded DNA binding;	-
ENSGALG00000003891	1543.12	1722.6	1363.64	0.791616	-0.337128	0.000384526	0.170794	Nodiff	11	6697537	6892810	+	5956	ZNF423	GO:0005634;GO:0007219;GO:0021930;GO:0021938;GO:0030513;GO:0043565;GO:0045892;GO:0045893;GO:0060271;GO:0061512;GO:0120163;	K22870	-	K	38CMH;3BE22;3CWA4;4811F;496DN;4GHEF	zinc finger protein 423 [Source:NCBI gene;Acc:415738]	415738	-	GO:0007219//Notch signaling pathway;GO:0021930//cerebellar granule cell precursor proliferation;GO:0021938//smoothened signaling pathway involved in regulation of cerebellar granule cell precursor cell proliferation;GO:0030513//positive regulation of BMP signaling pathway;GO:0045892//negative regulation of transcription, DNA-templated;GO:0045893//positive regulation of transcription, DNA-template…	GO:0005634//nucleus;	GO:0043565//sequence-specific DNA binding;	-
ENSGALG00000006666	22.3874	32.8681	11.9068	0.362258	-1.46491	0.000426731	0.184417	Down Regulation	20	10297297	10301910	-	1594	BPIFB2	GO:0008289;	-	-	L;V	KOG4160;39XJS;3BKXD;3CVFA;487UY;498H0;4GNVE	BPI fold containing family B member 2 [Source:NCBI gene;Acc:395882]	395882	O42273	-	-	GO:0008289//lipid binding;	-
ENSGALG00000045168	966.209	854.056	1078.36	1.26263	0.336437	0.000475295	0.199999	Nodiff	1	59308575	59315862	-	5901	-	-	-	-	-	-	KIAA1551 [Source:NCBI gene;Acc:418136]	418136	-	-	-	-	-
ENSGALG00000013018	300.885	253.468	348.302	1.37415	0.458537	0.000501444	0.205592	Nodiff	1	15825374	15829351	+	1813	TPRKB	GO:0000408;GO:0002949;GO:0005634;GO:0005737;GO:0005829;GO:0019901;	K15901	-	K	KOG4066;3A2H2;3BMN2;3D5RM;489AK;4985J;4GP3J	TP53RK binding protein [Source:NCBI gene;Acc:425906]	425906	E1BXT5	GO:0002949//tRNA threonylcarbamoyladenosine modification;	GO:0000408//EKC/KEOPS complex;GO:0005634//nucleus;GO:0005737//cytoplasm;GO:0005829//cytosol;	GO:0019901//protein kinase binding;	-
ENSGALG00000031122	1418.68	1588.97	1248.4	0.785669	-0.348006	0.000528779	0.207714	Nodiff	8	1215190	1359430	+	2351	NTNG1	GO:0005886;GO:0005886;GO:0007409;GO:0010975;GO:0046658;GO:0050804;GO:0050839;GO:0098632;GO:0098685;GO:0098978;GO:0099029;GO:0099560;GO:0099560;GO:0150011;GO:2001222;	K07522	-	-	-	netrin G1 [Source:NCBI gene;Acc:424336]	424336	-	GO:0007409//axonogenesis;GO:0010975//regulation of neuron projection development;GO:0050804//modulation of chemical synaptic transmission;GO:0099560//synaptic membrane adhesion;GO:0099560//synaptic membrane adhesion;GO:0150011//regulation of neuron projection arborization;GO:2001222//regulation of neuron migration;	GO:0005886//plasma membrane;GO:0005886//plasma membrane;GO:0046658//anchored component of plasma membrane;GO:0098685//Schaffer collateral - CA1 synapse;GO:0098978//glutamatergic synapse;GO:0099029//anchored component of presynaptic active zone membrane;	GO:0050839//cell adhesion molecule binding;GO:0098632//cell-cell adhesion mediator activity;	ko04514(Cell adhesion molecules);ko04360(Axon guidance)
ENSGALG00000027192	436.776	504.407	369.144	0.731839	-0.450402	0.000547651	0.207714	Nodiff	1	42207171	42220099	+	1647	NTS	GO:0005184;GO:0005576;GO:0005184;GO:0005576;GO:0007218;GO:0010628;GO:0010629;GO:0043231;GO:0048018;GO:0051092;GO:0051897;GO:0071855;	K05235	-	S	2RYW6;38QVA;3BP12;3D3B1;4860M;4951M;4GK7H	neurotensin [Source:NCBI gene;Acc:417883]	417883	R4GFZ2	GO:0007218//neuropeptide signaling pathway;GO:0010628//positive regulation of gene expression;GO:0010629//negative regulation of gene expression;GO:0051092//positive regulation of NF-kappaB transcription factor activity;GO:0051897//positive regulation of protein kinase B signaling;	GO:0005576//extracellular region;GO:0005576//extracellular region;GO:0043231//intracellular membrane-bounded organelle;	GO:0005184//neuropeptide hormone activity;GO:0005184//neuropeptide hormone activity;GO:0048018//receptor ligand activity;GO:0071855//neuropeptide receptor binding;	ko04080(Neuroactive ligand-receptor interaction)
ENSGALG00000017032	483.504	403.856	563.153	1.39444	0.479686	0.000553	0.207714	Nodiff	1	171829720	171845524	-	3151	SLC25A15	GO:0000064;GO:0016020;GO:0016021;GO:1990575;GO:0000064;GO:0016020;GO:0016021;GO:1990575;GO:0000064;GO:0016020;GO:0016021;GO:1990575;	K15101	-	C;U	KOG0763;38CY1;3BE42;3CTXN;482EG;48W78;4GT2B	solute carrier family 25 member 15 [Source:NCBI gene;Acc:418886]	418886	Q5ZIW6	GO:1990575//mitochondrial L-ornithine transmembrane transport;GO:1990575//mitochondrial L-ornithine transmembrane transport;GO:1990575//mitochondrial L-ornithine transmembrane transport;	GO:0016020//membrane;GO:0016021//integral component of membrane;GO:0016020//membrane;GO:0016021//integral component of membrane;GO:0016020//membrane;GO:0016021//integral component of membrane;	GO:0000064//L-ornithine transmembrane transporter activity;GO:0000064//L-ornithine transmembrane transporter activity;GO:0000064//L-ornithine transmembrane transporter activity;	-
ENSGALG00000032598	191.651	227.093	156.209	0.687863	-0.539807	0.000569298	0.207714	Nodiff	33	6846579	6855524	+	5078	MYO1A	GO:0000166;GO:0003774;GO:0003774;GO:0003774;GO:0003779;GO:0005515;GO:0005524;GO:0005524;GO:0005524;GO:0016459;GO:0016459;GO:0016459;GO:0003774;GO:0005515;GO:0005524;GO:0016459;GO:0003774;GO:0005515;GO:0005524;GO:0016459;GO:0003774;GO:0005515;GO:0005524;GO:0005737;GO:0005902;GO:0005902;GO:0005903;GO:0005903;GO:0007605;GO:0009925;GO:0016323;GO:0016324;GO:0016328;GO:0016328;GO:0016459;GO:0030030;GO:…	K10356	-	-	-	myosin IA [Source:NCBI gene;Acc:396072]	396072	P47807	GO:0007605//sensory perception of sound;GO:0030030//cell projection organization;GO:0030033//microvillus assembly;GO:0051648//vesicle localization;	GO:0016459//myosin complex;GO:0016459//myosin complex;GO:0016459//myosin complex;GO:0016459//myosin complex;GO:0016459//myosin complex;GO:0005737//cytoplasm;GO:0005902//microvillus;GO:0005902//microvillus;GO:0005903//brush border;GO:0005903//brush border;GO:0009925//basal plasma membrane;GO:0016323//basolateral plasma membrane;GO:0016324//apical plasma membrane;GO:0016328//lateral plasma membrane…	GO:0000166//nucleotide binding;GO:0003774//cytoskeletal motor activity;GO:0003774//cytoskeletal motor activity;GO:0003774//cytoskeletal motor activity;GO:0003779//actin binding;GO:0005515//protein binding;GO:0005524//ATP binding;GO:0005524//ATP binding;GO:0005524//ATP binding;GO:0003774//cytoskeletal motor activity;GO:0005515//protein binding;GO:0005524//ATP binding;GO:0003774//cytoskeletal motor…	ko05130(Pathogenic Escherichia coli infection)
ENSGALG00000029195	329.295	261.674	396.917	1.51683	0.601064	0.000571571	0.207714	Nodiff	13	18677413	18699290	+	2290	STK32A	GO:0004672;GO:0005524;GO:0006468;	K08793	EC:2.7.11.1	-	-	serine/threonine kinase 32A [Source:NCBI gene;Acc:416351]	416351	A0A1D5PEF0	GO:0006468//protein phosphorylation;	-	GO:0004672//protein kinase activity;GO:0005524//ATP binding;	-
ENSGALG00000025817	75.272	95.1292	55.4149	0.582522	-0.779615	0.000587458	0.208743	Nodiff	25	2427409	2432025	+	2272	NHLH1	GO:0000978;GO:0000981;GO:0000981;GO:0000981;GO:0003677;GO:0006357;GO:0006357;GO:0006357;GO:0046983;GO:0046983;	K09075	-	O;K	KOG4029;3A5XD;3BSSN;3D9CU;48E4M;49AU6;4GUX7	nescient helix-loop-helix 1 [Source:NCBI gene;Acc:373910]	373910	Q9PWD7	GO:0006357//regulation of transcription by RNA polymerase II;GO:0006357//regulation of transcription by RNA polymerase II;GO:0006357//regulation of transcription by RNA polymerase II;	-	GO:0000978//RNA polymerase II cis-regulatory region sequence-specific DNA binding;GO:0000981//DNA-binding transcription factor activity, RNA polymerase II-specific;GO:0000981//DNA-binding transcription factor activity, RNA polymerase II-specific;GO:0000981//DNA-binding transcription factor activity, RNA polymerase II-specific;GO:0003677//DNA binding;GO:0046983//protein dimerization activity;GO:00…	-
ENSGALG00000041907	1795.79	1979.12	1612.47	0.814739	-0.295591	0.000630436	0.219145	Nodiff	27	3889864	3890766	-	903	CDK5R1	GO:0005654;GO:0016533;GO:0018105;GO:0018107;GO:0019901;GO:0043231;GO:0043539;GO:0045892;GO:0048471;GO:0061575;	K11716	-	-	-	cyclin dependent kinase 5 regulatory subunit 1 [Source:NCBI gene;Acc:107055275]	107055275	A0A1D5P2X9	GO:0018105//peptidyl-serine phosphorylation;GO:0018107//peptidyl-threonine phosphorylation;GO:0045892//negative regulation of transcription, DNA-templated;	GO:0005654//nucleoplasm;GO:0016533//protein kinase 5 complex;GO:0043231//intracellular membrane-bounded organelle;GO:0048471//perinuclear region of cytoplasm;	GO:0019901//protein kinase binding;GO:0043539//protein serine/threonine kinase activator activity;GO:0061575//cyclin-dependent protein serine/threonine kinase activator activity;	ko05030(Cocaine addiction);ko05022(Pathways of neurodegeneration - multiple diseases);ko05010(Alzheimer disease)
ENSGALG00000027989	1912.36	1717.56	2107.17	1.22684	0.294949	0.000654059	0.219212	Nodiff	19	994862	999886	-	3006	SBDS	GO:0000922;GO:0000922;GO:0002244;GO:0002244;GO:0005634;GO:0005634;GO:0005654;GO:0005654;GO:0005730;GO:0005730;GO:0005737;GO:0005737;GO:0005819;GO:0005829;GO:0005856;GO:0006364;GO:0007052;GO:0008017;GO:0019843;GO:0030282;GO:0030595;GO:0042254;GO:0042254;GO:0042254;GO:0042256;GO:0042256;GO:0042256;GO:0042256;GO:0043022;GO:0043022;GO:0048539;	K14574	-	J	KOG2917;38DFK;3BCDI;3CSVQ;481W1;48V91;4GRXG	SBDS, ribosome maturation factor [Source:NCBI gene;Acc:417477]	417477	Q5ZIY4	GO:0002244//hematopoietic progenitor cell differentiation;GO:0002244//hematopoietic progenitor cell differentiation;GO:0006364//rRNA processing;GO:0007052//mitotic spindle organization;GO:0030282//bone mineralization;GO:0030595//leukocyte chemotaxis;GO:0042254//ribosome biogenesis;GO:0042254//ribosome biogenesis;GO:0042254//ribosome biogenesis;GO:0042256//mature ribosome assembly;GO:0042256//matu…	GO:0000922//spindle pole;GO:0000922//spindle pole;GO:0005634//nucleus;GO:0005634//nucleus;GO:0005654//nucleoplasm;GO:0005654//nucleoplasm;GO:0005730//nucleolus;GO:0005730//nucleolus;GO:0005737//cytoplasm;GO:0005737//cytoplasm;GO:0005819//spindle;GO:0005829//cytosol;GO:0005856//cytoskeleton;	GO:0008017//microtubule binding;GO:0019843//rRNA binding;GO:0043022//ribosome binding;GO:0043022//ribosome binding;	ko03008(Ribosome biogenesis in eukaryotes)
ENSGALG00000004669	532.667	463.142	602.192	1.30023	0.37877	0.000658048	0.219212	Nodiff	19	6849327	6858068	-	2619	ASPA	GO:0005829;GO:0005829;GO:0016788;GO:0016811;GO:0042802;	K01437	EC:3.5.1.15	E	2QRAK;39S2G;3BF8M;3CX8W;4840C;4953E;4GI6M	aspartoacylase [Source:NCBI gene;Acc:417609]	417609	-	-	GO:0005829//cytosol;GO:0005829//cytosol;	GO:0016788//hydrolase activity, acting on ester bonds;GO:0016811//hydrolase activity, acting on carbon-nitrogen (but not peptide) bonds, in linear amides;GO:0042802//identical protein binding;	ko00340(Histidine metabolism);ko00250(Alanine, aspartate and glutamate metabolism)
ENSGALG00000039477	807.883	901.329	714.437	0.792649	-0.335247	0.00068775	0.221979	Nodiff	4	89679418	89688532	+	2539	FBXO41	GO:0005515;GO:0005515;GO:0005515;GO:0005515;GO:0005515;	K10316	-	-	-	F-box protein 41 [Source:NCBI gene;Acc:428805]	428805	-	-	-	GO:0005515//protein binding;GO:0005515//protein binding;GO:0005515//protein binding;GO:0005515//protein binding;GO:0005515//protein binding;	-
ENSGALG00000004472	3468.58	3901.73	3035.44	0.777971	-0.362211	0.000722741	0.221979	Nodiff	8	7112556	7151143	+	3879	ASTN1	GO:0001764;GO:0005515;GO:0005768;GO:0007158;GO:0007626;GO:0009897;GO:0016021;GO:0016477;GO:0098609;	K24479	-	T;S	2R4QT;38F0T;3BD9W;3CSM2;47YUK;48VKW;4GHTK	astrotactin 1 [Source:NCBI gene;Acc:429070]	429070	-	GO:0001764//neuron migration;GO:0007158//neuron cell-cell adhesion;GO:0007626//locomotory behavior;GO:0016477//cell migration;GO:0098609//cell-cell adhesion;	GO:0005768//endosome;GO:0009897//external side of plasma membrane;GO:0016021//integral component of membrane;	GO:0005515//protein binding;	-
ENSGALG00000054793	315.935	376.263	255.608	0.679333	-0.55781	0.000729918	0.221979	Nodiff	1	1291724	1300691	+	2184	NCAPH2	GO:0000793;GO:0000796;GO:0005634;GO:0005654;GO:0005694;GO:0007076;GO:0007143;GO:0010032;GO:0030054;GO:0030261;GO:0033077;GO:0045171;GO:0051306;GO:0051309;	-	-	-	-	non-SMC condensin II complex subunit H2 [Source:NCBI gene;Acc:426276]	-	-	GO:0007076//mitotic chromosome condensation;GO:0007143//female meiotic nuclear division;GO:0010032//meiotic chromosome condensation;GO:0030261//chromosome condensation;GO:0033077//T cell differentiation in thymus;GO:0051306//mitotic sister chromatid separation;GO:0051309//female meiosis chromosome separation;	GO:0000793//condensed chromosome;GO:0000796//condensin complex;GO:0005634//nucleus;GO:0005654//nucleoplasm;GO:0005694//chromosome;GO:0030054//cell junction;GO:0045171//intercellular bridge;	-	-
ENSGALG00000005802	641.796	721.226	562.366	0.779736	-0.358942	0.000735235	0.221979	Nodiff	13	14053033	14099309	+	7894	FLT4	GO:0001934;GO:0001938;GO:0001946;GO:0004672;GO:0004713;GO:0004714;GO:0004714;GO:0005021;GO:0005021;GO:0005524;GO:0005654;GO:0005829;GO:0005886;GO:0005887;GO:0006468;GO:0007169;GO:0008284;GO:0010575;GO:0010595;GO:0018108;GO:0019838;GO:0019903;GO:0035924;GO:0038084;GO:0042803;GO:0043066;GO:0043235;GO:0043410;GO:0046330;GO:0046777;GO:0048010;GO:0048010;GO:0070374;GO:0090037;	K05097	EC:2.7.10.1	T	KOG0200;38B6K;3BDE9;3CSY8;480Q5;48ZP4;4GPC1	fms related tyrosine kinase 4 [Source:NCBI gene;Acc:395742]	395742	F1N871	GO:0001934//positive regulation of protein phosphorylation;GO:0001938//positive regulation of endothelial cell proliferation;GO:0001946//lymphangiogenesis;GO:0006468//protein phosphorylation;GO:0007169//transmembrane receptor protein tyrosine kinase signaling pathway;GO:0008284//positive regulation of cell population proliferation;GO:0010575//positive regulation of vascular endothelial growth fac…	GO:0005654//nucleoplasm;GO:0005829//cytosol;GO:0005886//plasma membrane;GO:0005887//integral component of plasma membrane;GO:0043235//receptor complex;	GO:0004672//protein kinase activity;GO:0004713//protein tyrosine kinase activity;GO:0004714//transmembrane receptor protein tyrosine kinase activity;GO:0004714//transmembrane receptor protein tyrosine kinase activity;GO:0005021//vascular endothelial growth factor-activated receptor activity;GO:0005021//vascular endothelial growth factor-activated receptor activity;GO:0005524//ATP binding;GO:00198…	ko05224(Breast cancer);ko05200(Pathways in cancer);ko04510(Focal adhesion);ko04151(PI3K-Akt signaling pathway);ko04020(Calcium signaling pathway);ko04015(Rap1 signaling pathway);ko04014(Ras signaling pathway);ko04010(MAPK signaling pathway)
ENSGALG00000008055	1039.65	1183	896.303	0.757655	-0.400387	0.000735766	0.221979	Nodiff	5	22558108	22570827	-	1853	SYT13	GO:0000149;GO:0001786;GO:0005509;GO:0005544;GO:0005886;GO:0005887;GO:0006906;GO:0014059;GO:0016192;GO:0016192;GO:0017156;GO:0017158;GO:0030133;GO:0030276;GO:0030424;GO:0043231;GO:0045202;GO:0070382;GO:0071277;	K19913	-	T;S;U	KOG1028;38WU7;3BBMG;3D072;486MG;48URP;4GMRD	synaptotagmin 13 [Source:NCBI gene;Acc:423175]	423175	-	GO:0006906//vesicle fusion;GO:0014059//regulation of dopamine secretion;GO:0016192//vesicle-mediated transport;GO:0016192//vesicle-mediated transport;GO:0017156//calcium-ion regulated exocytosis;GO:0017158//regulation of calcium ion-dependent exocytosis;GO:0071277//cellular response to calcium ion;	GO:0005886//plasma membrane;GO:0005887//integral component of plasma membrane;GO:0030133//transport vesicle;GO:0030424//axon;GO:0043231//intracellular membrane-bounded organelle;GO:0045202//synapse;GO:0070382//exocytic vesicle;	GO:0000149//SNARE binding;GO:0001786//phosphatidylserine binding;GO:0005509//calcium ion binding;GO:0005544//calcium-dependent phospholipid binding;GO:0030276//clathrin binding;	-
ENSGALG00000049193	662.666	757.775	567.557	0.748978	-0.417004	0.000775883	0.229748	Nodiff	25	1473405	1509424	-	4941	IQGAP3	GO:0000082;GO:0001934;GO:0005515;GO:0005516;GO:0005737;GO:0005911;GO:0007165;GO:0007265;GO:0008361;GO:0010628;GO:0010629;GO:0016328;GO:0031267;GO:0033601;GO:0043087;GO:0043410;GO:0070371;GO:0070856;GO:0071310;GO:0005515;	-	-	-	-	ras GTPase-activating-like protein IQGAP3-like [Source:NCBI gene;Acc:101749531]	-	-	GO:0000082//G1/S transition of mitotic cell cycle;GO:0001934//positive regulation of protein phosphorylation;GO:0007165//signal transduction;GO:0007265//Ras protein signal transduction;GO:0008361//regulation of cell size;GO:0010628//positive regulation of gene expression;GO:0010629//negative regulation of gene expression;GO:0033601//positive regulation of mammary gland epithelial cell proliferati…	GO:0005737//cytoplasm;GO:0005911//cell-cell junction;GO:0016328//lateral plasma membrane;	GO:0005515//protein binding;GO:0005516//calmodulin binding;GO:0031267//small GTPase binding;GO:0070856//myosin VI light chain binding;GO:0005515//protein binding;	-
ENSGALG00000003323	839.404	960.41	718.397	0.748011	-0.418869	0.000801347	0.232974	Nodiff	11	2532308	2633462	-	5279	NECAB2	GO:0005509;GO:0005886;GO:0030308;GO:0031687;GO:0031802;GO:0043065;GO:0060168;GO:0070374;GO:1900451;GO:1904021;GO:1905477;GO:0005509;GO:0030308;GO:0043065;GO:0030308;GO:0043065;GO:0030308;GO:0043065;GO:0030308;GO:0043065;GO:0030308;GO:0043065;GO:0030308;GO:0043065;GO:0030308;GO:0043065;	-	-	T;S	2QRUC;38BH9;3BFIF;3D3KH;482X0;491EW;4GQEH;2QRUQ;38DVN;3BEBM;3CUYN;48169;497IP;4GHPW	N-terminal EF-hand calcium binding protein 2 [Source:NCBI gene;Acc:415705]	415706	A0A1D5PTJ7	GO:0030308//negative regulation of cell growth;GO:0043065//positive regulation of apoptotic process;GO:0060168//positive regulation of adenosine receptor signaling pathway;GO:0070374//positive regulation of ERK1 and ERK2 cascade;GO:1900451//positive regulation of glutamate receptor signaling pathway;GO:1904021//negative regulation of G protein-coupled receptor internalization;GO:1905477//positive…	GO:0005886//plasma membrane;	GO:0005509//calcium ion binding;GO:0031687//A2A adenosine receptor binding;GO:0031802//type 5 metabotropic glutamate receptor binding;GO:0005509//calcium ion binding;	-
ENSGALG00000032628	1860.85	2050.57	1671.12	0.814951	-0.295214	0.000851605	0.242246	Nodiff	27	6683855	6736329	-	6065	SRCIN1	GO:0030334;GO:0034446;GO:0061001;GO:0030334;GO:0034446;GO:0061001;GO:0005737;GO:0015629;GO:0019901;GO:0030334;GO:0030334;GO:0034446;GO:0034446;GO:0061001;GO:0061001;GO:0061098;GO:0061099;GO:0030334;GO:0034446;GO:0061001;GO:0030334;GO:0034446;GO:0061001;GO:0030334;GO:0034446;GO:0061001;	-	-	-	-	SRC kinase signaling inhibitor 1 [Source:NCBI gene;Acc:426281]	-	-	GO:0030334//regulation of cell migration;GO:0034446//substrate adhesion-dependent cell spreading;GO:0061001//regulation of dendritic spine morphogenesis;GO:0030334//regulation of cell migration;GO:0034446//substrate adhesion-dependent cell spreading;GO:0061001//regulation of dendritic spine morphogenesis;GO:0030334//regulation of cell migration;GO:0030334//regulation of cell migration;GO:0034446/…	GO:0005737//cytoplasm;GO:0015629//actin cytoskeleton;	GO:0019901//protein kinase binding;	-
ENSGALG00000033811	4448.08	4864.42	4031.74	0.828824	-0.270863	0.000863542	0.242246	Nodiff	7	22183985	22193854	+	4209	PTPRN	GO:0000302;GO:0004725;GO:0005634;GO:0006470;GO:0016311;GO:0016791;GO:0030073;GO:0030141;GO:0030507;GO:0044389;GO:0045944;GO:1904692;GO:1990502;	K07817	EC:3.1.3.48	-	-	protein tyrosine phosphatase, receptor type N [Source:NCBI gene;Acc:424201]	424201	A0A1D5PAA5	GO:0000302//response to reactive oxygen species;GO:0006470//protein dephosphorylation;GO:0016311//dephosphorylation;GO:0030073//insulin secretion;GO:0045944//positive regulation of transcription by RNA polymerase II;GO:1904692//positive regulation of type B pancreatic cell proliferation;GO:1990502//dense core granule maturation;	GO:0005634//nucleus;GO:0030141//secretory granule;	GO:0004725//protein tyrosine phosphatase activity;GO:0016791//phosphatase activity;GO:0030507//spectrin binding;GO:0044389//ubiquitin-like protein ligase binding;	ko04940(Type I diabetes mellitus)
ENSGALG00000012004	818.817	728.569	909.064	1.24774	0.319315	0.000946453	0.260927	Nodiff	4	55019083	55052946	+	2472	PRSS12	GO:0004252;GO:0004252;GO:0005044;GO:0005886;GO:0006508;GO:0006508;GO:0006887;GO:0008233;GO:0016020;GO:0030424;GO:0030425;GO:0031410;GO:0031638;GO:0043083;GO:0043195;GO:0045202;	-	-	O;E	KOG3627;38EWN;3BC1C;3CVCK;485XY;4928E;4GIXH	protease, serine 12 [Source:NCBI gene;Acc:422685]	-	-	GO:0006508//proteolysis;GO:0006508//proteolysis;GO:0006887//exocytosis;GO:0031638//zymogen activation;	GO:0005886//plasma membrane;GO:0016020//membrane;GO:0030424//axon;GO:0030425//dendrite;GO:0031410//cytoplasmic vesicle;GO:0043083//synaptic cleft;GO:0043195//terminal bouton;GO:0045202//synapse;	GO:0004252//serine-type endopeptidase activity;GO:0004252//serine-type endopeptidase activity;GO:0005044//scavenger receptor activity;GO:0008233//peptidase activity;	-
ENSGALG00000007305	294.681	338.149	251.212	0.742904	-0.428752	0.000987068	0.265757	Nodiff	18	9976818	9980677	-	2646	NME1	GO:0004550;GO:0006165;GO:0006183;GO:0006228;GO:0006241;GO:0004550;GO:0006165;GO:0006183;GO:0006228;GO:0006241;GO:0004550;GO:0006165;GO:0006183;GO:0006228;GO:0006241;GO:0000287;GO:0004536;GO:0004550;GO:0004550;GO:0005524;GO:0005525;GO:0005634;GO:0005829;GO:0006165;GO:0006183;GO:0006228;GO:0006241;GO:0032587;GO:0042802;GO:0043024;GO:0043388;GO:0050679;	K00940	EC:2.7.4.6	F	KOG0888;3A1MB;3BPIJ;3D20N;4829Y;48XS1;4GM69	NME/NM23 nucleoside diphosphate kinase 1 [Source:NCBI gene;Acc:422094]	422094	F1N910	GO:0006165//nucleoside diphosphate phosphorylation;GO:0006183//GTP biosynthetic process;GO:0006228//UTP biosynthetic process;GO:0006241//CTP biosynthetic process;GO:0006165//nucleoside diphosphate phosphorylation;GO:0006183//GTP biosynthetic process;GO:0006228//UTP biosynthetic process;GO:0006241//CTP biosynthetic process;GO:0006165//nucleoside diphosphate phosphorylation;GO:0006183//GTP biosynth…	GO:0005634//nucleus;GO:0005829//cytosol;GO:0032587//ruffle membrane;	GO:0004550//nucleoside diphosphate kinase activity;GO:0004550//nucleoside diphosphate kinase activity;GO:0004550//nucleoside diphosphate kinase activity;GO:0000287//magnesium ion binding;GO:0004536//deoxyribonuclease activity;GO:0004550//nucleoside diphosphate kinase activity;GO:0004550//nucleoside diphosphate kinase activity;GO:0005524//ATP binding;GO:0005525//GTP binding;GO:0042802//identical p…	ko04016(MAPK signaling pathway - plant);ko00983(Drug metabolism - other enzymes);ko00240(Pyrimidine metabolism);ko00230(Purine metabolism)
ENSGALG00000043139	1225.75	1417.98	1033.52	0.728868	-0.45627	0.00100732	0.265757	Nodiff	5	351861	366567	-	1299	SYT7	GO:0005544;GO:0006887;GO:0016020;	K19907	-	-	-	synaptotagmin VII [Source:NCBI gene;Acc:101748423]	101748423	-	GO:0006887//exocytosis;	GO:0016020//membrane;	GO:0005544//calcium-dependent phospholipid binding;	-
ENSGALG00000030576	393.212	445.507	340.917	0.765234	-0.386028	0.00101383	0.265757	Nodiff	10	20420143	20421618	+	1476	-	GO:0005515;	-	-	-	-	ankyrin repeat domain 34C [Source:NCBI gene;Acc:415579]	-	-	-	-	GO:0005515//protein binding;	-
ENSGALG00000007045	1034.94	1148.12	921.767	0.802849	-0.316799	0.00104663	0.269929	Nodiff	6	22597002	22847758	-	3933	ADGRA1	GO:0004888;GO:0004930;GO:0005515;GO:0007166;GO:0007186;GO:0016020;GO:0016021;GO:0004888;GO:0004930;GO:0007166;GO:0007186;GO:0016021;	K08460	-	T;U	KOG0619;38CVZ;3BFVJ;3CZMS;480N3;499YT;4GWRD	adhesion G protein-coupled receptor A1 [Source:NCBI gene;Acc:423825]	423825	-	GO:0007166//cell surface receptor signaling pathway;GO:0007186//G protein-coupled receptor signaling pathway;GO:0007166//cell surface receptor signaling pathway;GO:0007186//G protein-coupled receptor signaling pathway;	GO:0016020//membrane;GO:0016021//integral component of membrane;GO:0016021//integral component of membrane;	GO:0004888//transmembrane signaling receptor activity;GO:0004930//G protein-coupled receptor activity;GO:0005515//protein binding;GO:0004888//transmembrane signaling receptor activity;GO:0004930//G protein-coupled receptor activity;	-
ENSGALG00000032418	1650.81	1842.87	1458.74	0.791558	-0.337233	0.00109455	0.277807	Nodiff	14	6793587	6812759	+	1705	RAB26	GO:0000139;GO:0003924;GO:0005525;GO:0005525;GO:0019002;GO:0035272;GO:0043001;GO:0045055;GO:0098993;GO:0099575;	K07913	-	-	-	RAB26, member RAS oncogene family [Source:NCBI gene;Acc:416554]	416554	A0A1D5NZL4	GO:0035272//exocrine system development;GO:0043001//Golgi to plasma membrane protein transport;GO:0045055//regulated exocytosis;GO:0099575//regulation of protein catabolic process at presynapse, modulating synaptic transmission;	GO:0000139//Golgi membrane;GO:0098993//anchored component of synaptic vesicle membrane;	GO:0003924//GTPase activity;GO:0005525//GTP binding;GO:0005525//GTP binding;GO:0019002//GMP binding;	-
ENSGALG00000036942	274.136	314.964	233.308	0.740743	-0.432955	0.00118458	0.295959	Nodiff	26	1492029	1493771	-	1743	KCNA3	GO:0005216;GO:0005249;GO:0005515;GO:0006811;GO:0006813;GO:0008076;GO:0016020;GO:0030424;GO:0051260;GO:0055085;	K04876	-	-	-	potassium voltage-gated channel subfamily A member 3 [Source:NCBI gene;Acc:404303]	404303	Q7T195	GO:0006811//ion transport;GO:0006813//potassium ion transport;GO:0051260//protein homooligomerization;GO:0055085//transmembrane transport;	GO:0008076//voltage-gated potassium channel complex;GO:0016020//membrane;GO:0030424//axon;	GO:0005216//ion channel activity;GO:0005249//voltage-gated potassium channel activity;GO:0005515//protein binding;	-
ENSGALG00000032974	524.789	595.215	454.363	0.763359	-0.389566	0.00125109	0.305307	Nodiff	13	14367414	14532703	+	3501	ADAMTS2	GO:0004222;GO:0006508;GO:0007283;GO:0008233;GO:0008237;GO:0008270;GO:0016485;GO:0030199;GO:0030324;GO:0031012;GO:0043588;GO:0062023;	K08618	EC:3.4.24.14	-	-	ADAM metallopeptidase with thrombospondin type 1 motif 2 [Source:NCBI gene;Acc:416291]	416291	-	GO:0006508//proteolysis;GO:0007283//spermatogenesis;GO:0016485//protein processing;GO:0030199//collagen fibril organization;GO:0030324//lung development;GO:0043588//skin development;	GO:0031012//extracellular matrix;GO:0062023//collagen-containing extracellular matrix;	GO:0004222//metalloendopeptidase activity;GO:0008233//peptidase activity;GO:0008237//metallopeptidase activity;GO:0008270//zinc ion binding;	-
ENSGALG00000003833	2171.22	2389.18	1953.27	0.81755	-0.290622	0.00126352	0.305307	Nodiff	8	6089202	6161870	-	7599	CACNA1E	GO:0005216;GO:0005245;GO:0005245;GO:0005509;GO:0005891;GO:0006811;GO:0016020;GO:0022843;GO:0055085;GO:0070588;GO:0005216;GO:0005245;GO:0005509;GO:0005891;GO:0006811;GO:0016020;GO:0055085;GO:0070588;GO:0005216;GO:0005245;GO:0005509;GO:0005891;GO:0006811;GO:0016020;GO:0055085;GO:0070588;GO:0005216;GO:0005245;GO:0005891;GO:0006811;GO:0016020;GO:0055085;GO:0070588;GO:0005216;GO:0005245;GO:0005509;GO:…	K04852	-	P;U	KOG2301;38BYK;3BAHQ;3CSUW;480ND;48WRS;4GQH6	calcium voltage-gated channel subunit alpha1 E [Source:NCBI gene;Acc:424412]	424412	-	GO:0006811//ion transport;GO:0055085//transmembrane transport;GO:0070588//calcium ion transmembrane transport;GO:0006811//ion transport;GO:0055085//transmembrane transport;GO:0070588//calcium ion transmembrane transport;GO:0006811//ion transport;GO:0055085//transmembrane transport;GO:0070588//calcium ion transmembrane transport;GO:0006811//ion transport;GO:0055085//transmembrane transport;GO:0070…	GO:0005891//voltage-gated calcium channel complex;GO:0016020//membrane;GO:0005891//voltage-gated calcium channel complex;GO:0016020//membrane;GO:0005891//voltage-gated calcium channel complex;GO:0016020//membrane;GO:0005891//voltage-gated calcium channel complex;GO:0016020//membrane;GO:0005891//voltage-gated calcium channel complex;GO:0016020//membrane;GO:0005891//voltage-gated calcium channel co…	GO:0005216//ion channel activity;GO:0005245//voltage-gated calcium channel activity;GO:0005245//voltage-gated calcium channel activity;GO:0005509//calcium ion binding;GO:0022843//voltage-gated cation channel activity;GO:0005216//ion channel activity;GO:0005245//voltage-gated calcium channel activity;GO:0005509//calcium ion binding;GO:0005216//ion channel activity;GO:0005245//voltage-gated calcium…	ko04930(Type II diabetes mellitus);ko04020(Calcium signaling pathway);ko04010(MAPK signaling pathway)
ENSGALG00000034673	274.376	315.539	233.213	0.739094	-0.43617	0.00127927	0.305307	Nodiff	4	80855311	80877258	+	1371	HTRA3	GO:0004175;GO:0004252;GO:0005515;GO:0005520;GO:0005576;GO:0006508;GO:0006508;GO:0006508;GO:0008236;GO:0008236;GO:0030512;GO:0030514;GO:0042802;	K08785	EC:3.4.21.-	-	-	HtrA serine peptidase 3 [Source:NCBI gene;Acc:422868]	422868	-	GO:0006508//proteolysis;GO:0006508//proteolysis;GO:0006508//proteolysis;GO:0030512//negative regulation of transforming growth factor beta receptor signaling pathway;GO:0030514//negative regulation of BMP signaling pathway;	GO:0005576//extracellular region;	GO:0004175//endopeptidase activity;GO:0004252//serine-type endopeptidase activity;GO:0005515//protein binding;GO:0005520//insulin-like growth factor binding;GO:0008236//serine-type peptidase activity;GO:0008236//serine-type peptidase activity;GO:0042802//identical protein binding;	-
ENSGALG00000052262	95.6791	117.191	74.1674	0.632877	-0.660004	0.00131691	0.309667	Nodiff	1	73969099	73970994	+	1896	KCNA5	GO:0005216;GO:0005249;GO:0005251;GO:0005515;GO:0005886;GO:0005886;GO:0005887;GO:0006811;GO:0006813;GO:0006813;GO:0007219;GO:0008076;GO:0008076;GO:0009986;GO:0014704;GO:0014704;GO:0015271;GO:0016020;GO:0016020;GO:0019229;GO:0019901;GO:0034705;GO:0042391;GO:0042391;GO:0043266;GO:0045121;GO:0051260;GO:0051393;GO:0055085;GO:0060081;GO:0060372;GO:0071805;GO:0086014;GO:0086050;GO:0086052;GO:0086087;GO:…	-	-	-	-	potassium voltage-gated channel subfamily A member 5 [Source:NCBI gene;Acc:395115]	-	-	GO:0006811//ion transport;GO:0006813//potassium ion transport;GO:0006813//potassium ion transport;GO:0007219//Notch signaling pathway;GO:0019229//regulation of vasoconstriction;GO:0042391//regulation of membrane potential;GO:0042391//regulation of membrane potential;GO:0043266//regulation of potassium ion transport;GO:0051260//protein homooligomerization;GO:0055085//transmembrane transport;GO:006…	GO:0005886//plasma membrane;GO:0005886//plasma membrane;GO:0005887//integral component of plasma membrane;GO:0008076//voltage-gated potassium channel complex;GO:0008076//voltage-gated potassium channel complex;GO:0009986//cell surface;GO:0014704//intercalated disc;GO:0014704//intercalated disc;GO:0016020//membrane;GO:0016020//membrane;GO:0034705//potassium channel complex;GO:0045121//membrane raf…	GO:0005216//ion channel activity;GO:0005249//voltage-gated potassium channel activity;GO:0005251//delayed rectifier potassium channel activity;GO:0005515//protein binding;GO:0015271//outward rectifier potassium channel activity;GO:0019901//protein kinase binding;GO:0051393//alpha-actinin binding;GO:0086087//voltage-gated potassium channel activity involved in bundle of His cell action potential r…	-
ENSGALG00000000806	369.066	418.712	319.42	0.762862	-0.390507	0.00136287	0.314501	Nodiff	28	2069057	2070874	+	1818	LINGO3	GO:0005515;	K23533	-	-	-	leucine rich repeat and Ig domain containing 3 [Source:NCBI gene;Acc:420075]	420075	A0A1L1RQ93	-	-	GO:0005515//protein binding;	-
ENSGALG00000045795	356.15	404.081	308.219	0.762766	-0.390688	0.00139648	0.314501	Nodiff	8	20919007	20982770	+	1629	-	GO:0016567;GO:0061630;	-	-	-	-	-	-	-	GO:0016567//protein ubiquitination;	-	GO:0061630//ubiquitin protein ligase activity;	-
ENSGALG00000053917	1928.63	1746.61	2110.64	1.20842	0.273124	0.00140952	0.314501	Nodiff	3	66946468	66958016	+	3950	CD164	GO:0005764;GO:0005768;GO:0005886;GO:0007155;GO:0007157;	-	-	-	-	CD164 molecule [Source:NCBI gene;Acc:395380]	-	-	GO:0007155//cell adhesion;GO:0007157//heterophilic cell-cell adhesion via plasma membrane cell adhesion molecules;	GO:0005764//lysosome;GO:0005768//endosome;GO:0005886//plasma membrane;	-	-
ENSGALG00000034020	718.999	801.271	636.728	0.794648	-0.331613	0.00141614	0.314501	Nodiff	22	1422776	1431392	-	3204	RHOBTB2	GO:0003924;GO:0005515;GO:0005525;	K07868	-	-	-	Rho-related BTB domain containing 2 [Source:NCBI gene;Acc:419536]	419536	-	-	-	GO:0003924//GTPase activity;GO:0005515//protein binding;GO:0005525//GTP binding;	ko04120(Ubiquitin mediated proteolysis)
ENSGALG00000033966	1330.29	1462.47	1198.12	0.819244	-0.287635	0.00146394	0.318195	Nodiff	1	193461898	193803700	+	8301	TENM4	GO:0001702;GO:0005634;GO:0005737;GO:0005886;GO:0005887;GO:0007165;GO:0016021;GO:0031641;GO:0031643;GO:0032289;GO:0032289;GO:0042802;GO:0042803;GO:0043005;GO:0048666;GO:0048666;GO:0048714;GO:0060038;GO:0060912;GO:2000543;	K24473	-	-	-	teneurin transmembrane protein 4 [Source:NCBI gene;Acc:395406]	395406	-	GO:0001702//gastrulation with mouth forming second;GO:0007165//signal transduction;GO:0031641//regulation of myelination;GO:0031643//positive regulation of myelination;GO:0032289//central nervous system myelin formation;GO:0032289//central nervous system myelin formation;GO:0048666//neuron development;GO:0048666//neuron development;GO:0048714//positive regulation of oligodendrocyte differentiatio…	GO:0005634//nucleus;GO:0005737//cytoplasm;GO:0005886//plasma membrane;GO:0005887//integral component of plasma membrane;GO:0016021//integral component of membrane;GO:0043005//neuron projection;	GO:0042802//identical protein binding;GO:0042803//protein homodimerization activity;	-
ENSGALG00000008602	917.987	747.722	1088.25	1.45542	0.541438	0.00151699	0.318195	Nodiff	2	19370281	19404271	-	2778	SLC39A12	GO:0016020;GO:0030001;GO:0046873;GO:0055085;GO:0016020;GO:0030001;GO:0046873;GO:0055085;GO:0005385;GO:0005886;GO:0007165;GO:0010975;GO:0016020;GO:0030001;GO:0031113;GO:0046873;GO:0048471;GO:0055085;GO:0071578;	K14718	-	P	KOG2693;38U95;3BEG6;3CTCQ;482UM;48ZVE;4GUJ9	solute carrier family 39 member 12 [Source:NCBI gene;Acc:420514]	420514	-	GO:0030001//metal ion transport;GO:0055085//transmembrane transport;GO:0030001//metal ion transport;GO:0055085//transmembrane transport;GO:0007165//signal transduction;GO:0010975//regulation of neuron projection development;GO:0030001//metal ion transport;GO:0031113//regulation of microtubule polymerization;GO:0055085//transmembrane transport;GO:0071578//zinc ion import across plasma membrane;	GO:0016020//membrane;GO:0016020//membrane;GO:0005886//plasma membrane;GO:0016020//membrane;GO:0048471//perinuclear region of cytoplasm;	GO:0046873//metal ion transmembrane transporter activity;GO:0046873//metal ion transmembrane transporter activity;GO:0005385//zinc ion transmembrane transporter activity;GO:0046873//metal ion transmembrane transporter activity;	ko05012(Parkinson disease);ko05010(Alzheimer disease)
ENSGALG00000013081	246.668	287.683	205.654	0.714862	-0.484264	0.0015181	0.318195	Nodiff	2	80493427	80551989	+	2029	VWC2	GO:0005515;GO:0005515;GO:0005604;GO:0005614;GO:0005615;GO:0010811;GO:0030514;GO:0031012;GO:0032281;GO:0045666;	K24521	-	S	2QW4Q;39RHP;3BFXM;3CZBG;484Y0;48X0U;4GMBW	von Willebrand factor C domain containing 2 [Source:NCBI gene;Acc:420944]	420944	A0A3Q2TT95	GO:0010811//positive regulation of cell-substrate adhesion;GO:0030514//negative regulation of BMP signaling pathway;GO:0045666//positive regulation of neuron differentiation;	GO:0005604//basement membrane;GO:0005614//interstitial matrix;GO:0005615//extracellular space;GO:0031012//extracellular matrix;GO:0032281//AMPA glutamate receptor complex;	GO:0005515//protein binding;GO:0005515//protein binding;	-
ENSGALG00000041371	2796.27	3108.48	2484.06	0.799124	-0.323508	0.00156355	0.318195	Nodiff	28	1263417	1290391	+	5217	-	GO:0005509;GO:0005543;GO:0007268;GO:0016082;GO:0016188;GO:0019992;GO:0035249;GO:0035556;GO:0005509;GO:0005543;GO:0007268;GO:0016082;GO:0016188;GO:0019992;GO:0035249;GO:0035556;	K15293	-	-	-	unc-13 homolog A [Source:NCBI gene;Acc:430487]	430487	-	GO:0007268//chemical synaptic transmission;GO:0016082//synaptic vesicle priming;GO:0016188//synaptic vesicle maturation;GO:0035249//synaptic transmission, glutamatergic;GO:0035556//intracellular signal transduction;GO:0007268//chemical synaptic transmission;GO:0016082//synaptic vesicle priming;GO:0016188//synaptic vesicle maturation;GO:0035249//synaptic transmission, glutamatergic;GO:0035556//int…	-	GO:0005509//calcium ion binding;GO:0005543//phospholipid binding;GO:0019992//diacylglycerol binding;GO:0005509//calcium ion binding;GO:0005543//phospholipid binding;GO:0019992//diacylglycerol binding;	ko04721(Synaptic vesicle cycle)
ENSGALG00000034196	236.597	289.387	183.807	0.63516	-0.654807	0.00156411	0.318195	Nodiff	26	3495149	3506642	+	2048	WNT2B	GO:0002062;GO:0005102;GO:0005576;GO:0007275;GO:0008584;GO:0009267;GO:0016055;GO:0021871;GO:0021871;GO:0043231;GO:0060070;GO:0060070;GO:0060492;GO:0060638;GO:0071425;GO:0090190;	K00182	-	-	-	Wnt family member 2B [Source:NCBI gene;Acc:374243]	374243	Q98SN7;A0A1D5NX70	GO:0002062//chondrocyte differentiation;GO:0007275//multicellular organism development;GO:0008584//male gonad development;GO:0009267//cellular response to starvation;GO:0016055//Wnt signaling pathway;GO:0021871//forebrain regionalization;GO:0021871//forebrain regionalization;GO:0060070//canonical Wnt signaling pathway;GO:0060070//canonical Wnt signaling pathway;GO:0060492//lung induction;GO:00606…	GO:0005576//extracellular region;GO:0043231//intracellular membrane-bounded organelle;	GO:0005102//signaling receptor binding;	ko05226(Gastric cancer);ko05225(Hepatocellular carcinoma);ko05224(Breast cancer);ko05217(Basal cell carcinoma);ko05205(Proteoglycans in cancer);ko05200(Pathways in cancer);ko05165(Human papillomavirus infection);ko05022(Pathways of neurodegeneration - multiple diseases);ko05010(Alzheimer disease);ko04934(Cushing syndrome);ko04916(Melanogenesis);ko04550(Signaling pathways regulating pluripotency o…
ENSGALG00000002725	365.376	413.451	317.301	0.767444	-0.381866	0.00156534	0.318195	Nodiff	8	4203923	4207433	-	2203	UAP1	GO:0005654;GO:0005829;GO:0005886;GO:0042802;GO:0070569;	K00972	-	-	-	UDP-N-acetylglucosamine pyrophosphorylase 1 [Source:NCBI gene;Acc:424368]	424368	-	-	GO:0005654//nucleoplasm;GO:0005829//cytosol;GO:0005886//plasma membrane;	GO:0042802//identical protein binding;GO:0070569//uridylyltransferase activity;	ko00520(Amino sugar and nucleotide sugar metabolism)
ENSGALG00000030845	2274.18	2488.84	2059.52	0.827501	-0.273166	0.00157207	0.318195	Nodiff	Z	7905544	7906945	-	1402	ENHO	-	K25411	-	-	-	energy homeostasis associated [Source:NCBI gene;Acc:768968]	768968	A0A1D5NVP7	-	-	-	-
ENSGALG00000044805	205.295	238.971	171.618	0.718153	-0.477636	0.00160147	0.320094	Nodiff	24	4233080	4234489	-	1410	RNF26	GO:0005789;GO:0007032;GO:0016567;GO:0032479;GO:0050687;GO:0061630;GO:0070979;GO:1905719;	K15693	EC:2.3.2.27	-	-	ring finger protein 26 [Source:NCBI gene;Acc:769803]	769803	A0A1L1RYJ8	GO:0007032//endosome organization;GO:0016567//protein ubiquitination;GO:0032479//regulation of type I interferon production;GO:0050687//negative regulation of defense response to virus;GO:0070979//protein K11-linked ubiquitination;GO:1905719//protein localization to perinuclear region of cytoplasm;	GO:0005789//endoplasmic reticulum membrane;	GO:0061630//ubiquitin protein ligase activity;	-
ENSGALG00000007269	1131.21	1246.85	1015.56	0.814501	-0.296012	0.0016345	0.321101	Nodiff	4	10750330	10800416	+	1395	GABRA3	GO:0004888;GO:0004890;GO:0005216;GO:0005230;GO:0006811;GO:0016020;GO:0016021;GO:0034220;	K05175	-	T;M	KOG3642;38ERZ;3BAW2;3CRX2;483ZA;48VAU;4GNZ4	gamma-aminobutyric acid type A receptor alpha3 subunit [Source:NCBI gene;Acc:422289]	422289	-	GO:0006811//ion transport;GO:0034220//ion transmembrane transport;	GO:0016020//membrane;GO:0016021//integral component of membrane;	GO:0004888//transmembrane signaling receptor activity;GO:0004890//GABA-A receptor activity;GO:0005216//ion channel activity;GO:0005230//extracellular ligand-gated ion channel activity;	ko05033(Nicotine addiction);ko05032(Morphine addiction);ko04742(Taste transduction);ko04727(GABAergic synapse);ko04723(Retrograde endocannabinoid signaling);ko04080(Neuroactive ligand-receptor interaction)
ENSGALG00000014466	596.524	667.209	525.839	0.788117	-0.343518	0.00165816	0.321101	Nodiff	1	77803621	77808412	-	1516	PIANP	GO:0050776;	-	-	S	2RH1H;38FVY;3BBWU;3CZZ2;485NN;48UWP;4GIPV	PILR alpha associated neural protein [Source:NCBI gene;Acc:418282]	-	-	GO:0050776//regulation of immune response;	-	-	-
ENSGALG00000041708	72.2395	93.7914	50.6876	0.540429	-0.887824	0.00166675	0.321101	Nodiff	21	6313309	6325046	+	1438	WNT4	GO:0001656;GO:0001658;GO:0001822;GO:0001823;GO:0001837;GO:0001838;GO:0001889;GO:0003714;GO:0005102;GO:0005102;GO:0005109;GO:0005109;GO:0005125;GO:0005576;GO:0005576;GO:0005576;GO:0005615;GO:0005615;GO:0005615;GO:0005615;GO:0005737;GO:0005737;GO:0007275;GO:0007276;GO:0007548;GO:0008584;GO:0008584;GO:0008585;GO:0009267;GO:0009986;GO:0010629;GO:0010629;GO:0010894;GO:0014858;GO:0016055;GO:0016055;GO:…	K00408	-	-	-	Wnt family member 4 [Source:NCBI gene;Acc:395561]	395561	P49337	GO:0001656//metanephros development;GO:0001658//branching involved in ureteric bud morphogenesis;GO:0001822//kidney development;GO:0001823//mesonephros development;GO:0001837//epithelial to mesenchymal transition;GO:0001838//embryonic epithelial tube formation;GO:0001889//liver development;GO:0007275//multicellular organism development;GO:0007276//gamete generation;GO:0007548//sex differentiation…	GO:0005576//extracellular region;GO:0005576//extracellular region;GO:0005576//extracellular region;GO:0005615//extracellular space;GO:0005615//extracellular space;GO:0005615//extracellular space;GO:0005615//extracellular space;GO:0005737//cytoplasm;GO:0005737//cytoplasm;GO:0009986//cell surface;GO:0031012//extracellular matrix;	GO:0003714//transcription corepressor activity;GO:0005102//signaling receptor binding;GO:0005102//signaling receptor binding;GO:0005109//frizzled binding;GO:0005109//frizzled binding;GO:0005125//cytokine activity;GO:0048018//receptor ligand activity;	ko05226(Gastric cancer);ko05225(Hepatocellular carcinoma);ko05224(Breast cancer);ko05217(Basal cell carcinoma);ko05205(Proteoglycans in cancer);ko05200(Pathways in cancer);ko05165(Human papillomavirus infection);ko05022(Pathways of neurodegeneration - multiple diseases);ko05010(Alzheimer disease);ko04934(Cushing syndrome);ko04919(Thyroid hormone signaling pathway);ko04916(Melanogenesis);ko04550(S…
ENSGALG00000031248	106.831	83.9355	129.726	1.54555	0.628118	0.00177266	0.337439	Nodiff	2	123036659	123049268	-	1151	RMDN1	GO:0005515;GO:0005876;GO:0008017;GO:0097431;	-	-	-	-	regulator of microtubule dynamics 1 [Source:NCBI gene;Acc:420213]	420213	A0A1D5PF81	-	GO:0005876//spindle microtubule;GO:0097431//mitotic spindle pole;	GO:0005515//protein binding;GO:0008017//microtubule binding;	-
ENSGALG00000012658	758.007	674.478	841.536	1.24768	0.319253	0.00186346	0.348168	Nodiff	1	53881515	53897895	-	4217	TCP11X2	-	-	-	A;T	KOG1981;38C0Q;3BCNB;3CTGE;48AT5;48XSW;4GIB9	t-complex 11 family, X-linked 2 [Source:NCBI gene;Acc:425052]	425052	Q6GVH3	-	-	-	-
ENSGALG00000003562	1633.03	2008.69	1257.37	0.625963	-0.67585	0.00187257	0.348168	Nodiff	14	1586869	1639631	+	2933	NPTX2	GO:0008306;GO:0098962;GO:0098978;	-	-	S	2QV29;38X1X;3BIUU;3CS5M;481DR;495H3;4GPKJ	neuronal pentraxin 2 [Source:NCBI gene;Acc:416438]	416438	E1C7S1	GO:0008306//associative learning;GO:0098962//regulation of postsynaptic neurotransmitter receptor activity;	GO:0098978//glutamatergic synapse;	-	-
ENSGALG00000045925	38.7654	56.919	20.6119	0.362127	-1.46543	0.00195783	0.354435	Down Regulation	1	111668196	111693509	-	805	-	-	-	-	-	-	-	418554	-	-	-	-	-
ENSGALG00000031275	800.664	684.777	916.552	1.33847	0.420583	0.00196422	0.354435	Nodiff	2	97238238	97246235	-	1968	TUBB6	GO:0000166;GO:0000226;GO:0000278;GO:0003924;GO:0003924;GO:0005200;GO:0005200;GO:0005200;GO:0005525;GO:0005525;GO:0005525;GO:0005525;GO:0005737;GO:0005737;GO:0005856;GO:0005874;GO:0005874;GO:0005874;GO:0005874;GO:0005874;GO:0007017;GO:0007017;	K07375	-	-	-	tubulin beta 6 class V [Source:NCBI gene;Acc:421037]	421037	P09653	GO:0000226//microtubule cytoskeleton organization;GO:0000278//mitotic cell cycle;GO:0007017//microtubule-based process;GO:0007017//microtubule-based process;	GO:0005737//cytoplasm;GO:0005737//cytoplasm;GO:0005856//cytoskeleton;GO:0005874//microtubule;GO:0005874//microtubule;GO:0005874//microtubule;GO:0005874//microtubule;GO:0005874//microtubule;	GO:0000166//nucleotide binding;GO:0003924//GTPase activity;GO:0003924//GTPase activity;GO:0005200//structural constituent of cytoskeleton;GO:0005200//structural constituent of cytoskeleton;GO:0005200//structural constituent of cytoskeleton;GO:0005525//GTP binding;GO:0005525//GTP binding;GO:0005525//GTP binding;GO:0005525//GTP binding;	ko05132(Salmonella infection);ko05130(Pathogenic Escherichia coli infection);ko05022(Pathways of neurodegeneration - multiple diseases);ko05020(Prion disease);ko05016(Huntington disease);ko05014(Amyotrophic lateral sclerosis);ko05012(Parkinson disease);ko05010(Alzheimer disease);ko04540(Gap junction);ko04145(Phagosome)
ENSGALG00000005621	1525.42	1826.76	1224.07	0.670077	-0.5776	0.00197278	0.354435	Nodiff	13	13896868	13917085	+	1750	CAMK2A	GO:0004672;GO:0004683;GO:0005516;GO:0005524;GO:0006468;GO:0004672;GO:0004683;GO:0005516;GO:0005524;GO:0006468;	K04515	EC:2.7.11.17	S;T	KOG0033;38FV7;3BF3D;3CSTU;47ZVD;48V9Q;4GTC4	calcium/calmodulin dependent protein kinase II alpha [Source:NCBI gene;Acc:374175]	374175	O93559	GO:0006468//protein phosphorylation;GO:0006468//protein phosphorylation;	-	GO:0004672//protein kinase activity;GO:0004683//calmodulin-dependent protein kinase activity;GO:0005516//calmodulin binding;GO:0005524//ATP binding;GO:0004672//protein kinase activity;GO:0004683//calmodulin-dependent protein kinase activity;GO:0005516//calmodulin binding;GO:0005524//ATP binding;	ko05417(Lipid and atherosclerosis);ko05415(Diabetic cardiomyopathy);ko05214(Glioma);ko05205(Proteoglycans in cancer);ko05200(Pathways in cancer);ko05152(Tuberculosis);ko05031(Amphetamine addiction);ko05022(Pathways of neurodegeneration - multiple diseases);ko05012(Parkinson disease);ko04971(Gastric acid secretion);ko04934(Cushing syndrome);ko04925(Aldosterone synthesis and secretion);ko04922(Gluc…
ENSGALG00000011111	388.484	438.783	338.184	0.770731	-0.375701	0.00204204	0.362803	Nodiff	3	40401196	40465340	-	1965	PGBD5	GO:0004803;GO:0004803;GO:0005634;GO:0005654;GO:0098038;GO:0098038;	-	-	-	-	piggyBac transposable element derived 5 [Source:NCBI gene;Acc:421541]	421541	A0A1D5P057	GO:0098038//non-replicative transposition, DNA-mediated;GO:0098038//non-replicative transposition, DNA-mediated;	GO:0005634//nucleus;GO:0005654//nucleoplasm;	GO:0004803//transposase activity;GO:0004803//transposase activity;	-
ENSGALG00000054420	6604.57	7338.83	5870.31	0.799897	-0.322114	0.00214907	0.373117	Nodiff	2	66294911	66299403	+	3458	-	GO:0003924;GO:0005200;GO:0005525;GO:0005874;GO:0007017;	-	-	Z	KOG1375;38EHS;3BDQF;3CSPW;482T5;48VYX;4GUJR	tubulin, beta 2A class IIa [Source:NCBI gene;Acc:768337]	-	-	GO:0007017//microtubule-based process;	GO:0005874//microtubule;	GO:0003924//GTPase activity;GO:0005200//structural constituent of cytoskeleton;GO:0005525//GTP binding;	-
ENSGALG00000033061	4646.2	5114.35	4178.05	0.816927	-0.291721	0.00218441	0.373117	Nodiff	22	5231576	5248343	+	4975	CAMK2B	GO:0004672;GO:0004683;GO:0005516;GO:0005524;GO:0006468;GO:0000166;GO:0004672;GO:0004672;GO:0004683;GO:0004683;GO:0004683;GO:0005516;GO:0005516;GO:0005516;GO:0005524;GO:0005524;GO:0005524;GO:0006468;GO:0006468;GO:0043226;GO:0106310;GO:0106311;GO:0004672;GO:0004683;GO:0005516;GO:0005524;GO:0006468;GO:0004672;GO:0005524;GO:0006468;	-	-	-	-	calcium/calmodulin dependent protein kinase II beta [Source:NCBI gene;Acc:374174]	-	-	GO:0006468//protein phosphorylation;GO:0006468//protein phosphorylation;GO:0006468//protein phosphorylation;GO:0006468//protein phosphorylation;GO:0006468//protein phosphorylation;	GO:0043226//organelle;	GO:0004672//protein kinase activity;GO:0004683//calmodulin-dependent protein kinase activity;GO:0005516//calmodulin binding;GO:0005524//ATP binding;GO:0000166//nucleotide binding;GO:0004672//protein kinase activity;GO:0004672//protein kinase activity;GO:0004683//calmodulin-dependent protein kinase activity;GO:0004683//calmodulin-dependent protein kinase activity;GO:0004683//calmodulin-dependent p…	-
ENSGALG00000042858	410.346	356.341	464.351	1.30311	0.38196	0.00220309	0.373117	Nodiff	2	62032429	62037354	+	2338	FAM8A1	GO:0000836;GO:0016020;GO:0016021;	-	-	-	-	family with sequence similarity 8 member A1 [Source:HGNC Symbol;Acc:HGNC:16372]	-	-	-	GO:0000836//Hrd1p ubiquitin ligase complex;GO:0016020//membrane;GO:0016021//integral component of membrane;	-	-
ENSGALG00000042159	866.679	956.01	777.348	0.813117	-0.298465	0.00226011	0.373117	Nodiff	9	21273430	21276090	+	2661	SLITRK3	GO:0005515;GO:0007409;GO:0007409;GO:0016021;GO:0051965;GO:0098982;GO:0098982;GO:0099055;GO:0099060;GO:0099560;GO:1905606;GO:1905606;GO:1905606;	-	-	-	-	uncharacterized LOC107054133 [Source:NCBI gene;Acc:107054133]	-	-	GO:0007409//axonogenesis;GO:0007409//axonogenesis;GO:0051965//positive regulation of synapse assembly;GO:0099560//synaptic membrane adhesion;GO:1905606//regulation of presynapse assembly;GO:1905606//regulation of presynapse assembly;GO:1905606//regulation of presynapse assembly;	GO:0016021//integral component of membrane;GO:0098982//GABA-ergic synapse;GO:0098982//GABA-ergic synapse;GO:0099055//integral component of postsynaptic membrane;GO:0099060//integral component of postsynaptic specialization membrane;	GO:0005515//protein binding;	-
ENSGALG00000026585	145.542	171.402	119.683	0.698258	-0.518169	0.00226462	0.373117	Nodiff	26	3572398	3578659	+	454	TAFA3	GO:0005615;GO:0005615;GO:0005615;GO:0007165;GO:0048018;GO:1903979;GO:1903980;	-	-	-	-	TAFA chemokine like family member 3 [Source:HGNC Symbol;Acc:HGNC:21590]	-	-	GO:0007165//signal transduction;GO:1903979//negative regulation of microglial cell activation;GO:1903980//positive regulation of microglial cell activation;	GO:0005615//extracellular space;GO:0005615//extracellular space;GO:0005615//extracellular space;	GO:0048018//receptor ligand activity;	-
ENSGALG00000041028	2706.6	2979.96	2433.23	0.816531	-0.29242	0.00226538	0.373117	Nodiff	3	104550333	104557734	-	1680	DPYSL5	GO:0005737;GO:0005737;GO:0007399;GO:0007399;GO:0007411;GO:0007411;GO:0008017;GO:0008017;GO:0016787;GO:0016787;GO:0016810;GO:0016810;	K07529	-	-	-	dihydropyrimidinase-related protein 5-like [Source:NCBI gene;Acc:107053190]	107053190	-	GO:0007399//nervous system development;GO:0007399//nervous system development;GO:0007411//axon guidance;GO:0007411//axon guidance;	GO:0005737//cytoplasm;GO:0005737//cytoplasm;	GO:0008017//microtubule binding;GO:0008017//microtubule binding;GO:0016787//hydrolase activity;GO:0016787//hydrolase activity;GO:0016810//hydrolase activity, acting on carbon-nitrogen (but not peptide) bonds;GO:0016810//hydrolase activity, acting on carbon-nitrogen (but not peptide) bonds;	ko04360(Axon guidance)
ENSGALG00000016285	410.134	360.145	460.124	1.27761	0.353445	0.00231583	0.373117	Nodiff	1	116059996	116093676	-	2659	-	GO:0004370;GO:0005975;GO:0006072;GO:0016773;GO:0004370;GO:0005975;GO:0006072;GO:0016773;GO:0004370;GO:0005975;GO:0006072;GO:0016773;GO:0004370;GO:0005975;GO:0006072;GO:0016773;GO:0004370;GO:0005975;GO:0006072;GO:0016773;	K00864	EC:2.7.1.30	C;G	KOG2517;38DGY;3B9PY;3CVSP;486H2;497B3;4GTPI	glycerol kinase 2 [Source:NCBI gene;Acc:418589]	418589	-	GO:0005975//carbohydrate metabolic process;GO:0006072//glycerol-3-phosphate metabolic process;GO:0005975//carbohydrate metabolic process;GO:0006072//glycerol-3-phosphate metabolic process;GO:0005975//carbohydrate metabolic process;GO:0006072//glycerol-3-phosphate metabolic process;GO:0005975//carbohydrate metabolic process;GO:0006072//glycerol-3-phosphate metabolic process;GO:0005975//carbohydrat…	-	GO:0004370//glycerol kinase activity;GO:0016773//phosphotransferase activity, alcohol group as acceptor;GO:0004370//glycerol kinase activity;GO:0016773//phosphotransferase activity, alcohol group as acceptor;GO:0004370//glycerol kinase activity;GO:0016773//phosphotransferase activity, alcohol group as acceptor;GO:0004370//glycerol kinase activity;GO:0016773//phosphotransferase activity, alcohol g…	ko04626(Plant-pathogen interaction);ko03320(PPAR signaling pathway);ko00561(Glycerolipid metabolism)
ENSGALG00000019663	2519.5	2298.2	2740.8	1.19258	0.254092	0.00233671	0.373117	Nodiff	2	20619979	20622930	+	770	ACBD7	GO:0000062;GO:0000062;	-	-	I	KOG0817;3A5WT;3BSPT;3D98A;48FX9;49CRH;4GVDQ	acyl-CoA binding domain containing 7 [Source:NCBI gene;Acc:420531]	420531	-	-	-	GO:0000062//fatty-acyl-CoA binding;GO:0000062//fatty-acyl-CoA binding;	-
ENSGALG00000011861	248.254	285.34	211.167	0.740054	-0.434297	0.0023402	0.373117	Nodiff	5	54047342	54104268	-	1996	SYT16	GO:0005543;GO:0006887;GO:0042802;	K19328	-	U;S;T	KOG1028;38FSB;3BAHZ;3CTT9;4828S;494HR;4GT79	synaptotagmin 16 [Source:NCBI gene;Acc:423516]	423516	-	GO:0006887//exocytosis;	-	GO:0005543//phospholipid binding;GO:0042802//identical protein binding;	-
ENSGALG00000039455	865.162	778.101	952.224	1.22378	0.291344	0.00235629	0.373117	Nodiff	2	98345430	98375779	-	2590	VAPA	GO:0005789;GO:0005783;GO:0005783;GO:0005789;GO:0005789;GO:0005789;GO:0005789;GO:0005886;GO:0005886;GO:0005923;GO:0006888;GO:0008017;GO:0008219;GO:0015630;GO:0016020;GO:0016021;GO:0019904;GO:0031175;GO:0031175;GO:0031982;GO:0033149;GO:0033149;GO:0044791;GO:0044828;GO:0044829;GO:0046982;GO:0048471;GO:0070972;GO:0090114;	K06096	-	-	-	VAMP associated protein A [Source:NCBI gene;Acc:768928]	768928	Q5F419	GO:0006888//endoplasmic reticulum to Golgi vesicle-mediated transport;GO:0008219//cell death;GO:0031175//neuron projection development;GO:0031175//neuron projection development;GO:0044791//obsolete positive regulation by host of viral release from host cell;GO:0044828//negative regulation by host of viral genome replication;GO:0044829//positive regulation by host of viral genome replication;GO:00…	GO:0005789//endoplasmic reticulum membrane;GO:0005783//endoplasmic reticulum;GO:0005783//endoplasmic reticulum;GO:0005789//endoplasmic reticulum membrane;GO:0005789//endoplasmic reticulum membrane;GO:0005789//endoplasmic reticulum membrane;GO:0005789//endoplasmic reticulum membrane;GO:0005886//plasma membrane;GO:0005886//plasma membrane;GO:0005923//bicellular tight junction;GO:0015630//microtubul…	GO:0008017//microtubule binding;GO:0019904//protein domain specific binding;GO:0033149//FFAT motif binding;GO:0033149//FFAT motif binding;GO:0046982//protein heterodimerization activity;	ko04979(Cholesterol metabolism)
ENSGALG00000008285	776.094	693.633	858.555	1.23777	0.307739	0.00235677	0.373117	Nodiff	1	13065354	13085319	-	2546	NAPEPLD	GO:0001659;GO:0005794;GO:0008270;GO:0032052;GO:0042802;GO:0048874;GO:0050729;GO:0070290;GO:0070290;GO:0070291;GO:0070292;GO:0070292;GO:0090336;	K13985	EC:3.1.4.54	V;J;S	KOG3798;39UP3;3BFB2;3CWR9;47ZVI;48Z9Y;4GK0X	N-acyl phosphatidylethanolamine phospholipase D [Source:NCBI gene;Acc:417719]	417719	Q5ZLB4	GO:0001659//temperature homeostasis;GO:0048874//host-mediated regulation of intestinal microbiota composition;GO:0050729//positive regulation of inflammatory response;GO:0070291//N-acylethanolamine metabolic process;GO:0070292//N-acylphosphatidylethanolamine metabolic process;GO:0070292//N-acylphosphatidylethanolamine metabolic process;GO:0090336//positive regulation of brown fat cell differentia…	GO:0005794//Golgi apparatus;	GO:0008270//zinc ion binding;GO:0032052//bile acid binding;GO:0042802//identical protein binding;GO:0070290//N-acylphosphatidylethanolamine-specific phospholipase D activity;GO:0070290//N-acylphosphatidylethanolamine-specific phospholipase D activity;	ko04723(Retrograde endocannabinoid signaling)
ENSGALG00000030259	1005.24	1104.94	905.549	0.819547	-0.287102	0.00242723	0.380504	Nodiff	18	1942703	1953196	-	1182	-	-	-	-	-	-	uncharacterized LOC101749287 [Source:NCBI gene;Acc:101749287]	-	-	-	-	-	-
ENSGALG00000026055	2032.36	2214.01	1850.72	0.835912	-0.258576	0.00249869	0.387903	Nodiff	28	2849820	2864572	+	3252	PALM	GO:0005654;GO:0005737;GO:0005886;GO:0005886;GO:0007010;GO:0007193;GO:0007194;GO:0008104;GO:0008360;GO:0008360;GO:0014069;GO:0016020;GO:0030175;GO:0031527;GO:0031750;GO:0044309;GO:0051491;GO:0060074;GO:0060160;GO:0071257;GO:0072659;GO:0008360;GO:0016020;GO:0008360;GO:0016020;	K16519	-	-	-	paralemmin [Source:NCBI gene;Acc:101750199]	101750199	A0A1D5PFN2	GO:0007010//cytoskeleton organization;GO:0007193//adenylate cyclase-inhibiting G protein-coupled receptor signaling pathway;GO:0007194//negative regulation of adenylate cyclase activity;GO:0008104//protein localization;GO:0008360//regulation of cell shape;GO:0008360//regulation of cell shape;GO:0051491//positive regulation of filopodium assembly;GO:0060074//synapse maturation;GO:0060160//negative…	GO:0005654//nucleoplasm;GO:0005737//cytoplasm;GO:0005886//plasma membrane;GO:0005886//plasma membrane;GO:0014069//postsynaptic density;GO:0016020//membrane;GO:0030175//filopodium;GO:0031527//filopodium membrane;GO:0044309//neuron spine;GO:0016020//membrane;GO:0016020//membrane;	GO:0031750//D3 dopamine receptor binding;	-
ENSGALG00000036754	1089.07	980.962	1197.18	1.22041	0.287369	0.00254538	0.391352	Nodiff	5	16353075	16372300	-	1359	CHKA	GO:0004103;GO:0004305;GO:0006646;GO:0006656;	K14156	-	-	-	choline kinase alpha [Source:NCBI gene;Acc:423112]	423112	-	GO:0006646//phosphatidylethanolamine biosynthetic process;GO:0006656//phosphatidylcholine biosynthetic process;	-	GO:0004103//choline kinase activity;GO:0004305//ethanolamine kinase activity;	ko05231(Choline metabolism in cancer);ko00564(Glycerophospholipid metabolism)
ENSGALG00000007945	3309.59	2963.22	3655.95	1.23378	0.303081	0.00258747	0.394034	Nodiff	24	6239995	6246232	+	1673	CRYAB	GO:0005212;GO:0001540;GO:0001666;GO:0002088;GO:0005198;GO:0005212;GO:0005212;GO:0005212;GO:0005634;GO:0005737;GO:0005739;GO:0005829;GO:0005886;GO:0007021;GO:0007517;GO:0010629;GO:0010941;GO:0030018;GO:0031333;GO:0032387;GO:0032991;GO:0042542;GO:0042802;GO:0042803;GO:0042803;GO:0043010;GO:0043066;GO:0043066;GO:0043154;GO:0043292;GO:0044877;GO:0045892;GO:0046872;GO:0050821;GO:0051082;GO:0060561;GO:…	K09542	-	S;O	KOG3591;38HJY;3BFZ0;3D2NH;488IJ;492DX;4GNFA	crystallin alpha B [Source:NCBI gene;Acc:396089]	396089	Q05713	GO:0001666//response to hypoxia;GO:0002088//lens development in camera-type eye;GO:0007021//tubulin complex assembly;GO:0007517//muscle organ development;GO:0010629//negative regulation of gene expression;GO:0010941//regulation of cell death;GO:0031333//negative regulation of protein-containing complex assembly;GO:0032387//negative regulation of intracellular transport;GO:0042542//response to hyd…	GO:0005634//nucleus;GO:0005737//cytoplasm;GO:0005739//mitochondrion;GO:0005829//cytosol;GO:0005886//plasma membrane;GO:0030018//Z disc;GO:0032991//protein-containing complex;GO:0043292//contractile fiber;	GO:0005212//structural constituent of eye lens;GO:0001540//amyloid-beta binding;GO:0005198//structural molecule activity;GO:0005212//structural constituent of eye lens;GO:0005212//structural constituent of eye lens;GO:0005212//structural constituent of eye lens;GO:0042802//identical protein binding;GO:0042803//protein homodimerization activity;GO:0042803//protein homodimerization activity;GO:0044…	ko04213(Longevity regulating pathway - multiple species);ko04141(Protein processing in endoplasmic reticulum)
ENSGALG00000027188	1370.94	1640.29	1101.59	0.671582	-0.574364	0.00263008	0.396745	Nodiff	14	5307535	5318482	-	4836	SREBF1	GO:0046983;GO:0000122;GO:0000977;GO:0000978;GO:0000981;GO:0000981;GO:0001221;GO:0001228;GO:0003062;GO:0003677;GO:0003682;GO:0003700;GO:0004879;GO:0005634;GO:0005634;GO:0005737;GO:0006355;GO:0007623;GO:0008286;GO:0008610;GO:0008610;GO:0009267;GO:0009749;GO:0010867;GO:0016020;GO:0019217;GO:0019901;GO:0031065;GO:0031647;GO:0032810;GO:0032933;GO:0042789;GO:0043565;GO:0045444;GO:0045542;GO:0045893;GO:…	K07197	-	K	KOG2588;39IEW;3BABD;3CRAA;481UK;495AZ;4GK7K	sterol regulatory element binding transcription factor 1 [Source:NCBI gene;Acc:373915]	373915	Q90ZM5	GO:0000122//negative regulation of transcription by RNA polymerase II;GO:0003062//regulation of heart rate by chemical signal;GO:0006355//regulation of transcription, DNA-templated;GO:0007623//circadian rhythm;GO:0008286//insulin receptor signaling pathway;GO:0008610//lipid biosynthetic process;GO:0008610//lipid biosynthetic process;GO:0009267//cellular response to starvation;GO:0009749//response…	GO:0005634//nucleus;GO:0005634//nucleus;GO:0005737//cytoplasm;GO:0016020//membrane;	GO:0046983//protein dimerization activity;GO:0000977//RNA polymerase II transcription regulatory region sequence-specific DNA binding;GO:0000978//RNA polymerase II cis-regulatory region sequence-specific DNA binding;GO:0000981//DNA-binding transcription factor activity, RNA polymerase II-specific;GO:0000981//DNA-binding transcription factor activity, RNA polymerase II-specific;GO:0001221//transcr…	ko04936(Alcoholic liver disease);ko04932(Non-alcoholic fatty liver disease);ko04931(Insulin resistance);ko04910(Insulin signaling pathway);ko04152(AMPK signaling pathway)
ENSGALG00000048343	46.4154	33.3625	59.4683	1.78249	0.833896	0.00267419	0.39963	Nodiff	11	11155098	11177848	-	2636	-	-	-	-	-	-	carboxylesterase 1 like 2 [Source:NCBI gene;Acc:769339]	-	-	-	-	-	-
ENSGALG00000008380	773.042	854.119	691.965	0.81015	-0.30374	0.00270326	0.400233	Nodiff	5	23887606	23926161	-	5957	DGKZ	GO:0003951;GO:0004143;GO:0005515;GO:0007165;GO:0007205;GO:0016301;GO:0035556;GO:0003951;GO:0004143;GO:0005515;GO:0007165;GO:0007205;GO:0016301;GO:0035556;GO:0003951;GO:0004143;GO:0005515;GO:0007165;GO:0007205;GO:0016301;GO:0035556;GO:0003951;GO:0004143;GO:0005515;GO:0007165;GO:0007205;GO:0016301;GO:0035556;GO:0003951;GO:0004143;GO:0005515;GO:0007165;GO:0007205;GO:0016301;GO:0035556;GO:0003951;GO:…	K00901	EC:2.7.1.107	T;G	KOG0782;38BQZ;3BAZ2;3CSMM;482WZ;496E5;4GQBI	diacylglycerol kinase zeta [Source:NCBI gene;Acc:423197]	423197	Q5F494	GO:0007165//signal transduction;GO:0007205//protein kinase C-activating G protein-coupled receptor signaling pathway;GO:0035556//intracellular signal transduction;GO:0007165//signal transduction;GO:0007205//protein kinase C-activating G protein-coupled receptor signaling pathway;GO:0035556//intracellular signal transduction;GO:0007165//signal transduction;GO:0007205//protein kinase C-activating G…	GO:0005634//nucleus;GO:0005829//cytosol;GO:0016607//nuclear speck;GO:0030027//lamellipodium;	GO:0003951//NAD+ kinase activity;GO:0004143//diacylglycerol kinase activity;GO:0005515//protein binding;GO:0016301//kinase activity;GO:0003951//NAD+ kinase activity;GO:0004143//diacylglycerol kinase activity;GO:0005515//protein binding;GO:0016301//kinase activity;GO:0003951//NAD+ kinase activity;GO:0004143//diacylglycerol kinase activity;GO:0005515//protein binding;GO:0016301//kinase activity;GO:…	ko05231(Choline metabolism in cancer);ko04361(Axon regeneration);ko04072(Phospholipase D signaling pathway);ko04070(Phosphatidylinositol signaling system);ko00564(Glycerophospholipid metabolism);ko00561(Glycerolipid metabolism)
ENSGALG00000052592	113.222	138.383	88.0612	0.63636	-0.652084	0.00283013	0.415173	Nodiff	21	4229868	4232446	+	966	TMEM82	GO:0016020;GO:0016021;	-	-	-	-	transmembrane protein 82 [Source:HGNC Symbol;Acc:HGNC:32350]	-	-	-	GO:0016020//membrane;GO:0016021//integral component of membrane;	-	-
ENSGALG00000014975	66.2555	82.3412	50.1698	0.609292	-0.714795	0.00286799	0.416902	Nodiff	4	78488493	78491401	-	1365	DRD5	GO:0001588;GO:0001975;GO:0001992;GO:0001994;GO:0004930;GO:0004952;GO:0004952;GO:0005886;GO:0005887;GO:0005929;GO:0007186;GO:0007189;GO:0007189;GO:0007189;GO:0007191;GO:0007617;GO:0008306;GO:0016021;GO:0019226;GO:0031526;GO:0033861;GO:0035240;GO:0042060;GO:0042220;GO:0045776;GO:0045924;GO:0046960;GO:0060170;GO:0060292;GO:0071870;GO:0072593;GO:0097730;GO:0004930;GO:0004952;GO:0005887;GO:0007186;GO:…	K05840	-	O;T	KOG3656;38G6G;3B9BF;3CU6D;481WV;48ZVZ;4GM81	dopamine receptor D5 [Source:NCBI gene;Acc:427552]	427552	-	GO:0001975//response to amphetamine;GO:0001992//regulation of systemic arterial blood pressure by vasopressin;GO:0001994//norepinephrine-epinephrine vasoconstriction involved in regulation of systemic arterial blood pressure;GO:0007186//G protein-coupled receptor signaling pathway;GO:0007189//adenylate cyclase-activating G protein-coupled receptor signaling pathway;GO:0007189//adenylate cyclase-a…	GO:0005886//plasma membrane;GO:0005887//integral component of plasma membrane;GO:0005929//cilium;GO:0016021//integral component of membrane;GO:0031526//brush border membrane;GO:0060170//ciliary membrane;GO:0097730//non-motile cilium;GO:0005887//integral component of plasma membrane;GO:0016021//integral component of membrane;	GO:0001588//dopamine neurotransmitter receptor activity, coupled via Gs;GO:0004930//G protein-coupled receptor activity;GO:0004952//dopamine neurotransmitter receptor activity;GO:0004952//dopamine neurotransmitter receptor activity;GO:0035240//dopamine binding;GO:0004930//G protein-coupled receptor activity;GO:0004952//dopamine neurotransmitter receptor activity;	ko04728(Dopaminergic synapse);ko04080(Neuroactive ligand-receptor interaction);ko04024(cAMP signaling pathway);ko04020(Calcium signaling pathway)
ENSGALG00000006144	198.883	229.808	167.958	0.730863	-0.452327	0.00291451	0.417229	Nodiff	11	18760175	18764817	+	2279	CDK10	GO:0004672;GO:0004674;GO:0004693;GO:0005524;GO:0005634;GO:0006468;GO:0007346;GO:0018107;GO:0032956;GO:0036064;GO:0043410;GO:0097472;GO:1902018;GO:0004672;GO:0004693;GO:0005524;GO:0006468;GO:0007346;	K02449	EC:2.7.11.22	T	KOG0663;38C2D;3BD71;3CTE8;489A7;490NB;4GKH6	cyclin dependent kinase 10 [Source:NCBI gene;Acc:415840]	415840	F1NCQ0	GO:0006468//protein phosphorylation;GO:0007346//regulation of mitotic cell cycle;GO:0018107//peptidyl-threonine phosphorylation;GO:0032956//regulation of actin cytoskeleton organization;GO:0043410//positive regulation of MAPK cascade;GO:1902018//negative regulation of cilium assembly;GO:0006468//protein phosphorylation;GO:0007346//regulation of mitotic cell cycle;	GO:0005634//nucleus;GO:0036064//ciliary basal body;	GO:0004672//protein kinase activity;GO:0004674//protein serine/threonine kinase activity;GO:0004693//cyclin-dependent protein serine/threonine kinase activity;GO:0005524//ATP binding;GO:0097472//cyclin-dependent protein kinase activity;GO:0004672//protein kinase activity;GO:0004693//cyclin-dependent protein serine/threonine kinase activity;GO:0005524//ATP binding;	-
ENSGALG00000050728	112.864	143.518	82.21	0.572819	-0.803848	0.0029527	0.417229	Nodiff	25	1413813	1421352	+	1867	-	GO:0007155;GO:0007155;GO:0007155;GO:0007229;GO:0008305;GO:0008305;GO:0016020;GO:0016021;	-	-	-	-	-	-	-	GO:0007155//cell adhesion;GO:0007155//cell adhesion;GO:0007155//cell adhesion;GO:0007229//integrin-mediated signaling pathway;	GO:0008305//integrin complex;GO:0008305//integrin complex;GO:0016020//membrane;GO:0016021//integral component of membrane;	-	-
ENSGALG00000015275	260.582	224.691	296.473	1.31947	0.39996	0.00295546	0.417229	Nodiff	1	85978411	85985291	+	2541	NIT2	GO:0006807;GO:0005813;GO:0005829;GO:0006107;GO:0006528;GO:0006541;GO:0006807;GO:0050152;	K13566	EC:3.5.1.3	-	-	nitrilase family member 2 [Source:NCBI gene;Acc:418386]	418386	-	GO:0006807//nitrogen compound metabolic process;GO:0006107//oxaloacetate metabolic process;GO:0006528//asparagine metabolic process;GO:0006541//glutamine metabolic process;GO:0006807//nitrogen compound metabolic process;	GO:0005813//centrosome;GO:0005829//cytosol;	GO:0050152//omega-amidase activity;	ko00250(Alanine, aspartate and glutamate metabolism)
ENSGALG00000002708	2354.04	2580.72	2127.37	0.824332	-0.278702	0.00297462	0.417229	Nodiff	10	3212741	3290778	+	2707	LINGO1	GO:0005515;GO:0005886;GO:0016020;GO:0016021;	K23533	-	T;U	KOG0619;39R2F;3BH3X;3CZIV;4831Z;494H9;4GQAA	leucine rich repeat and Ig domain containing 1 [Source:HGNC Symbol;Acc:HGNC:21205]	415344	Q50L44	-	GO:0005886//plasma membrane;GO:0016020//membrane;GO:0016021//integral component of membrane;	GO:0005515//protein binding;	-
ENSGALG00000009424	423.195	473.969	372.421	0.785749	-0.34786	0.00301367	0.419031	Nodiff	1	26049718	26110344	-	2870	FOXP2	GO:0003677;GO:0003700;GO:0003700;GO:0006355;GO:0021757;GO:0021758;GO:0021987;GO:0042802;GO:0042803;GO:0043565;GO:0043565;GO:0045892;	K09409	-	K	KOG4385;39BYV;3B9SZ;3CU5V;489KW;491VT;4GS9E	forkhead box P2 [Source:NCBI gene;Acc:769935]	769935	G8HZI1	GO:0006355//regulation of transcription, DNA-templated;GO:0021757//caudate nucleus development;GO:0021758//putamen development;GO:0021987//cerebral cortex development;GO:0045892//negative regulation of transcription, DNA-templated;	-	GO:0003677//DNA binding;GO:0003700//DNA-binding transcription factor activity;GO:0003700//DNA-binding transcription factor activity;GO:0042802//identical protein binding;GO:0042803//protein homodimerization activity;GO:0043565//sequence-specific DNA binding;GO:0043565//sequence-specific DNA binding;	-
ENSGALG00000002594	214.221	173.27	255.171	1.47268	0.558441	0.00305065	0.420517	Nodiff	7	999492	1117976	+	3471	TFPI	GO:0004867;GO:0005576;GO:0005615;GO:0005901;GO:0009986;GO:0010466;GO:0030195;GO:0030414;GO:0071383;GO:0004867;GO:0005576;GO:0010466;GO:0030414;GO:0004867;GO:0005576;GO:0010466;GO:0030414;GO:0004867;GO:0004867;GO:0005576;GO:0010466;GO:0030414;	K03909	-	O;S	KOG4295;38ES0;3BEEM;3CZR5;4880D;490DC;4GS6J	tissue factor pathway inhibitor [Source:NCBI gene;Acc:423989]	423989	A0A1D5PXV0	GO:0010466//negative regulation of peptidase activity;GO:0030195//negative regulation of blood coagulation;GO:0071383//cellular response to steroid hormone stimulus;GO:0010466//negative regulation of peptidase activity;GO:0010466//negative regulation of peptidase activity;GO:0010466//negative regulation of peptidase activity;	GO:0005576//extracellular region;GO:0005615//extracellular space;GO:0005901//caveola;GO:0009986//cell surface;GO:0005576//extracellular region;GO:0005576//extracellular region;GO:0005576//extracellular region;	GO:0004867//serine-type endopeptidase inhibitor activity;GO:0030414//peptidase inhibitor activity;GO:0004867//serine-type endopeptidase inhibitor activity;GO:0030414//peptidase inhibitor activity;GO:0004867//serine-type endopeptidase inhibitor activity;GO:0030414//peptidase inhibitor activity;GO:0004867//serine-type endopeptidase inhibitor activity;GO:0004867//serine-type endopeptidase inhibitor …	ko04610(Complement and coagulation cascades)
ENSGALG00000005360	978.305	882.33	1074.28	1.21755	0.283982	0.0031879	0.435679	Nodiff	19	8243835	8262292	-	2746	CA4	GO:0004089;GO:0004089;GO:0005791;GO:0005793;GO:0005794;GO:0005802;GO:0005886;GO:0005886;GO:0008270;GO:0009986;GO:0015701;GO:0016020;GO:0016324;GO:0030658;GO:0030667;GO:0031225;GO:0031362;GO:0031526;GO:0046658;GO:0048471;GO:0070062;	K18246	EC:4.2.1.1	P	KOG0382;39XTU;3BMQY;3D16D;48385;49916;4GKC5	carbonic anhydrase 4 [Source:NCBI gene;Acc:417647]	417647	E1C004	GO:0015701//bicarbonate transport;	GO:0005791//rough endoplasmic reticulum;GO:0005793//endoplasmic reticulum-Golgi intermediate compartment;GO:0005794//Golgi apparatus;GO:0005802//trans-Golgi network;GO:0005886//plasma membrane;GO:0005886//plasma membrane;GO:0009986//cell surface;GO:0016020//membrane;GO:0016324//apical plasma membrane;GO:0030658//transport vesicle membrane;GO:0030667//secretory granule membrane;GO:0031225//anchore…	GO:0004089//carbonate dehydratase activity;GO:0004089//carbonate dehydratase activity;GO:0008270//zinc ion binding;	ko04964(Proximal tubule bicarbonate reclamation);ko00910(Nitrogen metabolism)
ENSGALG00000007211	812.514	894.592	730.436	0.816503	-0.29247	0.00323323	0.437312	Nodiff	20	10649497	10684260	-	3141	CDH22	GO:0005509;GO:0005886;GO:0007155;GO:0007156;GO:0016020;GO:0098609;	K06812	-	S	KOG3594;39C48;3BFU7;3CSQS;4871J;48YSC;4GI24	cadherin 22 [Source:NCBI gene;Acc:419305]	419305	-	GO:0007155//cell adhesion;GO:0007156//homophilic cell adhesion via plasma membrane adhesion molecules;GO:0098609//cell-cell adhesion;	GO:0005886//plasma membrane;GO:0016020//membrane;	GO:0005509//calcium ion binding;	-
ENSGALG00000011885	1579.1	1438.86	1719.34	1.19493	0.256925	0.00325605	0.437312	Nodiff	4	53964699	53995130	+	1902	ANXA5	GO:0005509;GO:0005544;GO:0005544;GO:0009897;GO:0010033;GO:0050819;GO:0072563;GO:0005509;GO:0005544;GO:0050819;GO:0005509;GO:0005544;GO:0050819;	K16646	-	-	-	annexin A5 [Source:NCBI gene;Acc:428767]	428767	P17153	GO:0010033//response to organic substance;GO:0050819//negative regulation of coagulation;GO:0050819//negative regulation of coagulation;GO:0050819//negative regulation of coagulation;	GO:0009897//external side of plasma membrane;GO:0072563//endothelial microparticle;	GO:0005509//calcium ion binding;GO:0005544//calcium-dependent phospholipid binding;GO:0005544//calcium-dependent phospholipid binding;GO:0005509//calcium ion binding;GO:0005544//calcium-dependent phospholipid binding;GO:0005509//calcium ion binding;GO:0005544//calcium-dependent phospholipid binding;	-
ENSGALG00000034628	1125.03	1018.33	1231.74	1.20958	0.274501	0.00330141	0.437312	Nodiff	2	85678766	85684086	+	4086	CCDC127	-	-	-	-	-	coiled-coil domain containing 127 [Source:NCBI gene;Acc:420970]	420970	Q5ZIN7	-	-	-	-
ENSGALG00000041783	708.194	625.001	791.387	1.26622	0.340524	0.00333374	0.437312	Nodiff	1	36512612	36525747	+	1745	TMEM19	GO:0016021;	-	-	-	-	transmembrane protein 19 [Source:NCBI gene;Acc:417856]	-	-	-	GO:0016021//integral component of membrane;	-	-
ENSGALG00000027629	2096.04	2273.6	1918.48	0.843804	-0.24502	0.00333659	0.437312	Nodiff	5	58219426	58234374	+	2321	GNG2	GO:0005834;GO:0005834;GO:0005834;GO:0005886;GO:0007165;GO:0007186;GO:0007186;GO:0007186;GO:0007186;GO:0008283;GO:0016020;GO:0031681;GO:0031681;GO:0031681;GO:0031681;	K07826	-	T;O	KOG4119;3A5KU;3BSMX;3D9GZ;48FWX;49CX6;4GVII	G protein subunit gamma 2 [Source:NCBI gene;Acc:423581]	423581	Q5ZJ03	GO:0007165//signal transduction;GO:0007186//G protein-coupled receptor signaling pathway;GO:0007186//G protein-coupled receptor signaling pathway;GO:0007186//G protein-coupled receptor signaling pathway;GO:0007186//G protein-coupled receptor signaling pathway;GO:0008283//cell population proliferation;	GO:0005834//heterotrimeric G-protein complex;GO:0005834//heterotrimeric G-protein complex;GO:0005834//heterotrimeric G-protein complex;GO:0005886//plasma membrane;GO:0016020//membrane;	GO:0031681//G-protein beta-subunit binding;GO:0031681//G-protein beta-subunit binding;GO:0031681//G-protein beta-subunit binding;GO:0031681//G-protein beta-subunit binding;	ko05200(Pathways in cancer);ko05170(Human immunodeficiency virus 1 infection);ko05167(Kaposi sarcoma-associated herpesvirus infection);ko05163(Human cytomegalovirus infection);ko05034(Alcoholism);ko05032(Morphine addiction);ko04926(Relaxin signaling pathway);ko04728(Dopaminergic synapse);ko04727(GABAergic synapse);ko04726(Serotonergic synapse);ko04725(Cholinergic synapse);ko04724(Glutamatergic sy…
ENSGALG00000041900	1285.66	1405.66	1165.66	0.829256	-0.27011	0.00339666	0.441566	Nodiff	4	2475257	2530889	-	3619	DLG3	GO:0001736;GO:0005515;GO:0005737;GO:0005886;GO:0005911;GO:0005923;GO:0019900;GO:0019902;GO:0031625;GO:0032281;GO:0045197;GO:0098978;GO:0099072;GO:0005515;GO:0005515;GO:0005515;	K21098	-	-	-	discs large MAGUK scaffold protein 3 [Source:NCBI gene;Acc:428706]	428706	A0A3Q2U4B8	GO:0001736//establishment of planar polarity;GO:0045197//establishment or maintenance of epithelial cell apical/basal polarity;GO:0099072//regulation of postsynaptic membrane neurotransmitter receptor levels;	GO:0005737//cytoplasm;GO:0005886//plasma membrane;GO:0005911//cell-cell junction;GO:0005923//bicellular tight junction;GO:0032281//AMPA glutamate receptor complex;GO:0098978//glutamatergic synapse;	GO:0005515//protein binding;GO:0019900//kinase binding;GO:0019902//phosphatase binding;GO:0031625//ubiquitin protein ligase binding;GO:0005515//protein binding;GO:0005515//protein binding;GO:0005515//protein binding;	ko05165(Human papillomavirus infection);ko04530(Tight junction);ko04390(Hippo signaling pathway)
ENSGALG00000009241	227.868	171.238	284.498	1.66142	0.732421	0.00345917	0.445983	Nodiff	4	20063168	20067413	-	2293	SFRP2	GO:0001569;GO:0001756;GO:0001843;GO:0002063;GO:0003151;GO:0003214;GO:0005515;GO:0005615;GO:0005615;GO:0006915;GO:0008047;GO:0008284;GO:0008284;GO:0008285;GO:0008584;GO:0009410;GO:0009952;GO:0010629;GO:0010667;GO:0010719;GO:0010950;GO:0010975;GO:0017147;GO:0021915;GO:0030111;GO:0030178;GO:0030178;GO:0030199;GO:0030307;GO:0030308;GO:0030336;GO:0030514;GO:0031668;GO:0033138;GO:0036342;GO:0042127;GO:…	K02176	-	T;M	KOG3577;38C9X;3BDJ5;3CZRW;487P0;48VK3;4GJ1H	secreted frizzled related protein 2 [Source:NCBI gene;Acc:395546]	395546	Q9IA96	GO:0001569//branching involved in blood vessel morphogenesis;GO:0001756//somitogenesis;GO:0001843//neural tube closure;GO:0002063//chondrocyte development;GO:0003151//outflow tract morphogenesis;GO:0003214//cardiac left ventricle morphogenesis;GO:0006915//apoptotic process;GO:0008284//positive regulation of cell population proliferation;GO:0008284//positive regulation of cell population prolifera…	GO:0005615//extracellular space;GO:0005615//extracellular space;	GO:0005515//protein binding;GO:0008047//enzyme activator activity;GO:0017147//Wnt-protein binding;GO:0048018//receptor ligand activity;GO:0061133//endopeptidase activator activity;	ko04310(Wnt signaling pathway)
ENSGALG00000038601	73.8611	56.618	91.1042	1.6091	0.686257	0.0035098	0.445983	Nodiff	9	3823425	3834615	-	1595	LIPH	GO:0004465;GO:0004620;GO:0004620;GO:0004806;GO:0004806;GO:0005576;GO:0005615;GO:0005615;GO:0005886;GO:0006629;GO:0006629;GO:0006633;GO:0008201;GO:0016042;GO:0016042;GO:0016298;GO:0019433;GO:0046872;GO:0052689;GO:0052689;GO:0004806;GO:0004806;GO:0005576;GO:0006629;GO:0006629;GO:0046872;GO:0052689;GO:0052689;	-	-	T;O	2QUQT;38PDC;3BHJE;3D0ED;481VE;4975V;4GNM8	lipase H [Source:HGNC Symbol;Acc:HGNC:18483]	-	-	GO:0006629//lipid metabolic process;GO:0006629//lipid metabolic process;GO:0006633//fatty acid biosynthetic process;GO:0016042//lipid catabolic process;GO:0016042//lipid catabolic process;GO:0019433//triglyceride catabolic process;GO:0006629//lipid metabolic process;GO:0006629//lipid metabolic process;	GO:0005576//extracellular region;GO:0005615//extracellular space;GO:0005615//extracellular space;GO:0005886//plasma membrane;GO:0005576//extracellular region;	GO:0004465//lipoprotein lipase activity;GO:0004620//phospholipase activity;GO:0004620//phospholipase activity;GO:0004806//triglyceride lipase activity;GO:0004806//triglyceride lipase activity;GO:0008201//heparin binding;GO:0016298//lipase activity;GO:0046872//metal ion binding;GO:0052689//carboxylic ester hydrolase activity;GO:0052689//carboxylic ester hydrolase activity;GO:0004806//triglyceride …	-
ENSGALG00000010497	704.076	776.388	631.763	0.813721	-0.297394	0.00351431	0.445983	Nodiff	14	4479913	4485230	+	2176	SLC29A4	GO:0005326;GO:0005326;GO:0005337;GO:0005342;GO:0005886;GO:0006836;GO:0006836;GO:0008324;GO:0008504;GO:0008504;GO:0008504;GO:0015101;GO:0015562;GO:0015695;GO:0015844;GO:0016021;GO:0016323;GO:0016323;GO:0016324;GO:0016324;GO:0019534;GO:0042908;GO:0042908;GO:0042910;GO:0051610;GO:0051610;GO:0051615;GO:0051620;GO:0051620;GO:0051625;GO:0055085;GO:0090494;GO:0090494;GO:0098655;GO:0140115;GO:1901642;GO:…	K03323	-	F;S	KOG1479;39U8J;3BDKR;3CYZE;485PZ;492TI;4GQVN	solute carrier family 29 member 4 [Source:NCBI gene;Acc:425593]	425593	F1NNK0	GO:0006836//neurotransmitter transport;GO:0006836//neurotransmitter transport;GO:0015695//organic cation transport;GO:0015844//monoamine transport;GO:0042908//xenobiotic transport;GO:0042908//xenobiotic transport;GO:0051610//serotonin uptake;GO:0051610//serotonin uptake;GO:0051615//histamine uptake;GO:0051620//norepinephrine uptake;GO:0051620//norepinephrine uptake;GO:0051625//epinephrine uptake;…	GO:0005886//plasma membrane;GO:0016021//integral component of membrane;GO:0016323//basolateral plasma membrane;GO:0016323//basolateral plasma membrane;GO:0016324//apical plasma membrane;GO:0016324//apical plasma membrane;	GO:0005326//neurotransmitter transmembrane transporter activity;GO:0005326//neurotransmitter transmembrane transporter activity;GO:0005337//nucleoside transmembrane transporter activity;GO:0005342//organic acid transmembrane transporter activity;GO:0008324//cation transmembrane transporter activity;GO:0008504//monoamine transmembrane transporter activity;GO:0008504//monoamine transmembrane transp…	-
ENSGALG00000001304	456.262	403.283	509.241	1.26274	0.336558	0.00358395	0.447587	Nodiff	21	1909587	1916282	+	4457	-	-	-	-	-	-	transmembrane protein 52 [Source:NCBI gene;Acc:419401]	-	-	-	-	-	-
ENSGALG00000001264	886.238	1008.6	763.874	0.757359	-0.400951	0.00367023	0.447587	Nodiff	26	2758582	2845137	-	5728	PLXNA2	GO:0001756;GO:0005515;GO:0005887;GO:0007165;GO:0007166;GO:0017154;GO:0017154;GO:0021915;GO:0021935;GO:0030334;GO:0042802;GO:0051642;GO:0060037;GO:0060174;GO:0071526;GO:0071526;GO:0005515;GO:0007165;GO:0017154;GO:0071526;GO:0005515;GO:0007165;GO:0017154;GO:0071526;	K06820	-	B;Q;T	KOG3610;38DZI;3B9A7;3CS6M;4806H;48VYP;4GN9W	plexin A2 [Source:NCBI gene;Acc:419857]	419857	-	GO:0001756//somitogenesis;GO:0007165//signal transduction;GO:0007166//cell surface receptor signaling pathway;GO:0021915//neural tube development;GO:0021935//cerebellar granule cell precursor tangential migration;GO:0030334//regulation of cell migration;GO:0051642//centrosome localization;GO:0060037//pharyngeal system development;GO:0060174//limb bud formation;GO:0071526//semaphorin-plexin signal…	GO:0005887//integral component of plasma membrane;	GO:0005515//protein binding;GO:0017154//semaphorin receptor activity;GO:0017154//semaphorin receptor activity;GO:0042802//identical protein binding;GO:0005515//protein binding;GO:0017154//semaphorin receptor activity;GO:0005515//protein binding;GO:0017154//semaphorin receptor activity;	ko04360(Axon guidance)
ENSGALG00000045288	1702.73	1968.78	1436.69	0.729734	-0.454558	0.00368854	0.447587	Nodiff	21	4889771	4890492	-	234	CAMK2N1	GO:0004860;GO:0004860;GO:0006469;GO:0007616;GO:0008285;GO:0008427;GO:0010628;GO:0014069;GO:0019901;GO:0045202;GO:0045786;GO:0045861;GO:0070373;GO:1904030;	-	-	-	-	calcium/calmodulin dependent protein kinase II inhibitor 1 [Source:NCBI gene;Acc:100858651]	100858651	A0A1L1RNT7	GO:0006469//negative regulation of protein kinase activity;GO:0007616//long-term memory;GO:0008285//negative regulation of cell population proliferation;GO:0010628//positive regulation of gene expression;GO:0045786//negative regulation of cell cycle;GO:0045861//negative regulation of proteolysis;GO:0070373//negative regulation of ERK1 and ERK2 cascade;GO:1904030//negative regulation of cyclin-dep…	GO:0014069//postsynaptic density;GO:0045202//synapse;	GO:0004860//protein kinase inhibitor activity;GO:0004860//protein kinase inhibitor activity;GO:0008427//calcium-dependent protein kinase inhibitor activity;GO:0019901//protein kinase binding;	-
ENSGALG00000000275	556.817	496.405	617.23	1.2434	0.31429	0.00368964	0.447587	Nodiff	22	962634	970983	+	3580	KCTD9	GO:0005515;GO:0035556;GO:0035556;GO:0042802;GO:0043621;GO:0051260;GO:0051260;GO:0097602;	K21919	-	S;O	KOG1665;38XIW;3BAH7;3CSFY;485JY;490M8;4GMS8	potassium channel tetramerization domain containing 9 [Source:NCBI gene;Acc:419526]	419526	Q5ZJ71	GO:0035556//intracellular signal transduction;GO:0035556//intracellular signal transduction;GO:0051260//protein homooligomerization;GO:0051260//protein homooligomerization;	-	GO:0005515//protein binding;GO:0042802//identical protein binding;GO:0043621//protein self-association;GO:0097602//cullin family protein binding;	-
ENSGALG00000014371	1265.15	1151.15	1379.15	1.19806	0.260703	0.00369085	0.447587	Nodiff	3	37820739	37836628	-	2842	LGALS8	GO:0005178;GO:0005737;GO:0005829;GO:0030246;GO:0030246;GO:0098586;GO:0098792;GO:1904977;GO:0030246;GO:0030246;GO:0030246;GO:0030246;GO:0030246;GO:0030246;	K06832	-	S;W	KOG3587;38F0D;3BAQ8;3D0B9;484S4;49761;4GKIK	galectin 8 [Source:NCBI gene;Acc:430948]	430948	Q5I9D4	GO:0098586//cellular response to virus;GO:0098792//xenophagy;GO:1904977//lymphatic endothelial cell migration;	GO:0005737//cytoplasm;GO:0005829//cytosol;	GO:0005178//integrin binding;GO:0030246//carbohydrate binding;GO:0030246//carbohydrate binding;GO:0030246//carbohydrate binding;GO:0030246//carbohydrate binding;GO:0030246//carbohydrate binding;GO:0030246//carbohydrate binding;GO:0030246//carbohydrate binding;GO:0030246//carbohydrate binding;	-
ENSGALG00000029983	93.1674	67.623	118.712	1.7555	0.811878	0.00373229	0.447587	Nodiff	2	131756078	131920640	-	3698	ANGPT1	GO:0001525;GO:0001525;GO:0001933;GO:0001934;GO:0002040;GO:0002092;GO:0002719;GO:0005102;GO:0005615;GO:0005886;GO:0005902;GO:0007162;GO:0007169;GO:0007171;GO:0010595;GO:0010628;GO:0014068;GO:0014842;GO:0030097;GO:0030210;GO:0030971;GO:0030971;GO:0031398;GO:0031589;GO:0032680;GO:0033138;GO:0034394;GO:0042308;GO:0042802;GO:0043066;GO:0043116;GO:0043116;GO:0043122;GO:0043393;GO:0043524;GO:0043536;GO:…	K05465	-	-	-	angiopoietin 1 [Source:NCBI gene;Acc:395129]	395129	A0A1D5PBH8	GO:0001525//angiogenesis;GO:0001525//angiogenesis;GO:0001933//negative regulation of protein phosphorylation;GO:0001934//positive regulation of protein phosphorylation;GO:0002040//sprouting angiogenesis;GO:0002092//positive regulation of receptor internalization;GO:0002719//negative regulation of cytokine production involved in immune response;GO:0007162//negative regulation of cell adhesion;GO:0…	GO:0005615//extracellular space;GO:0005886//plasma membrane;GO:0005902//microvillus;GO:0045121//membrane raft;	GO:0005102//signaling receptor binding;GO:0030971//receptor tyrosine kinase binding;GO:0030971//receptor tyrosine kinase binding;GO:0042802//identical protein binding;	ko05323(Rheumatoid arthritis);ko04151(PI3K-Akt signaling pathway);ko04066(HIF-1 signaling pathway);ko04015(Rap1 signaling pathway);ko04014(Ras signaling pathway);ko04010(MAPK signaling pathway)
ENSGALG00000012377	82.9547	65.2776	100.632	1.5416	0.624425	0.00373291	0.447587	Nodiff	7	31246874	31261994	+	3390	HNMT	GO:0008170;GO:0001692;GO:0001695;GO:0005654;GO:0005737;GO:0005813;GO:0005829;GO:0008170;GO:0008170;GO:0032259;GO:0046539;	K00546	EC:2.1.1.8	S	2QQJ1;38DI2;3BCPH;3CXTQ;47ZBZ;48VGQ;4GR7I	histamine N-methyltransferase [Source:NCBI gene;Acc:424298]	424298	E1C378	GO:0001692//histamine metabolic process;GO:0001695//histamine catabolic process;GO:0032259//methylation;	GO:0005654//nucleoplasm;GO:0005737//cytoplasm;GO:0005813//centrosome;GO:0005829//cytosol;	GO:0008170//N-methyltransferase activity;GO:0008170//N-methyltransferase activity;GO:0008170//N-methyltransferase activity;GO:0046539//histamine N-methyltransferase activity;	ko00340(Histidine metabolism)
ENSGALG00000014767	351.186	290.275	412.096	1.41967	0.50556	0.0037903	0.447587	Nodiff	Z	20606619	20631370	+	2008	TRAPPC13	-	K20310	-	S	KOG2625;38ER9;3BDCT;3CZGW;4816C;48Z7F;4GRVM	trafficking protein particle complex 13 [Source:NCBI gene;Acc:427165]	427165	Q5ZI92	-	-	-	-
ENSGALG00000025959	40.8724	24.0671	57.6777	2.39654	1.26095	0.00381522	0.447587	Up Regulation	12	5336741	5340965	-	1217	MKRN2OS	-	-	-	S	2R8ZC;39R67;3BEIW;3D39B;488F2;48WQN;4GUST	MKRN2 opposite strand [Source:NCBI gene;Acc:415966]	-	-	-	-	-	-
ENSGALG00000005998	609.623	544.933	674.312	1.23742	0.307338	0.00384418	0.447587	Nodiff	5	10584558	10619955	-	2888	RRAS	GO:0003924;GO:0005525;GO:0007165;GO:0016020;GO:0003924;GO:0005525;GO:0007165;GO:0007265;GO:0009987;GO:0016020;GO:0030335;GO:1901214;	K07830	-	G;S	KOG0395;38C7W;3BEW3;3CTXG;483B8;492J0;4GHKJ	related RAS viral (r-ras) oncogene homolog [Source:NCBI gene;Acc:423062]	423062	Q5ZIW8	GO:0007165//signal transduction;GO:0007165//signal transduction;GO:0007265//Ras protein signal transduction;GO:0009987//cellular process;GO:0030335//positive regulation of cell migration;GO:1901214//regulation of neuron death;	GO:0016020//membrane;GO:0016020//membrane;	GO:0003924//GTPase activity;GO:0005525//GTP binding;GO:0003924//GTPase activity;GO:0005525//GTP binding;	ko05205(Proteoglycans in cancer);ko04810(Regulation of actin cytoskeleton);ko04625(C-type lectin receptor signaling pathway);ko04371(Apelin signaling pathway);ko04218(Cellular senescence);ko04140(Autophagy - animal);ko04137(Mitophagy - animal);ko04072(Phospholipase D signaling pathway);ko04024(cAMP signaling pathway);ko04014(Ras signaling pathway);ko04010(MAPK signaling pathway)
ENSGALG00000045878	10.3363	16.0713	4.60122	0.2863	-1.8044	0.00385253	0.447587	Down Regulation	12	3320193	3327844	-	3889	-	-	-	-	-	-	HEAT repeat-containing protein 8-like 3 [Source:NCBI gene;Acc:415939]	415939	-	-	-	-	-
ENSGALG00000006810	86.3137	108.757	63.8705	0.587277	-0.767886	0.00386285	0.447587	Nodiff	9	12056956	12064322	-	1474	ZIC4	GO:0000977;GO:0003677;GO:0005634;GO:1990837;	K09225	-	S	38EYF;3BCH8;3CUTF;48433;491M4;4GSDB	Zic family member 4 [Source:NCBI gene;Acc:424885]	424885	-	-	GO:0005634//nucleus;	GO:0000977//RNA polymerase II transcription regulatory region sequence-specific DNA binding;GO:0003677//DNA binding;GO:1990837//sequence-specific double-stranded DNA binding;	-
ENSGALG00000009530	298.541	345.49	251.592	0.728218	-0.457557	0.0039855	0.458476	Nodiff	1	29166774	29412777	+	2775	PDZRN4	GO:0005515;GO:0005515;	K15682	EC:2.3.2.27	S;T	KOG0312;KOG0297;38G4Y;3BB0I;3CYMJ;47ZZE;493UK;4GRZB	PDZ domain containing ring finger 4 [Source:NCBI gene;Acc:417787]	417787	-	-	-	GO:0005515//protein binding;GO:0005515//protein binding;	-
ENSGALG00000013846	2624.85	2888.55	2361.14	0.817414	-0.290861	0.00404907	0.462145	Nodiff	3	54492908	54572776	-	6919	ARFGEF3	GO:0005085;GO:0032012;GO:0005085;GO:0032012;GO:0005085;GO:0032012;GO:0005085;GO:0032012;	K17572	-	J;U	KOG1846;38H13;3BFVX;3CWH1;489TU;48ZZJ;4GKM1	ARFGEF family member 3 [Source:NCBI gene;Acc:421681]	421681	-	GO:0032012//regulation of ARF protein signal transduction;GO:0032012//regulation of ARF protein signal transduction;GO:0032012//regulation of ARF protein signal transduction;GO:0032012//regulation of ARF protein signal transduction;	-	GO:0005085//guanyl-nucleotide exchange factor activity;GO:0005085//guanyl-nucleotide exchange factor activity;GO:0005085//guanyl-nucleotide exchange factor activity;GO:0005085//guanyl-nucleotide exchange factor activity;	-
ENSGALG00000005248	299.507	260.66	338.353	1.29806	0.376362	0.0040752	0.462145	Nodiff	8	12174912	12231784	+	1921	CDC14A	GO:0000226;GO:0000922;GO:0004721;GO:0004722;GO:0004722;GO:0004725;GO:0004725;GO:0004725;GO:0005654;GO:0005730;GO:0005737;GO:0005813;GO:0005813;GO:0005829;GO:0006470;GO:0006470;GO:0007096;GO:0007605;GO:0008138;GO:0008138;GO:0016311;GO:0016311;GO:0016604;GO:0016787;GO:0016791;GO:0016791;GO:0032467;GO:0035335;GO:0060271;GO:0072686;GO:0106306;GO:0106307;GO:1902636;	K06639	-	T;V	KOG1720;38BJJ;3BE0A;3CZD8;480JG;492N9;4GIWQ	cell division cycle 14A [Source:NCBI gene;Acc:424466]	424466	D5K9Y5	GO:0000226//microtubule cytoskeleton organization;GO:0006470//protein dephosphorylation;GO:0006470//protein dephosphorylation;GO:0007096//regulation of exit from mitosis;GO:0007605//sensory perception of sound;GO:0016311//dephosphorylation;GO:0016311//dephosphorylation;GO:0032467//positive regulation of cytokinesis;GO:0035335//peptidyl-tyrosine dephosphorylation;GO:0060271//cilium assembly;	GO:0000922//spindle pole;GO:0005654//nucleoplasm;GO:0005730//nucleolus;GO:0005737//cytoplasm;GO:0005813//centrosome;GO:0005813//centrosome;GO:0005829//cytosol;GO:0016604//nuclear body;GO:0072686//mitotic spindle;GO:1902636//kinociliary basal body;	GO:0004721//phosphoprotein phosphatase activity;GO:0004722//protein serine/threonine phosphatase activity;GO:0004722//protein serine/threonine phosphatase activity;GO:0004725//protein tyrosine phosphatase activity;GO:0004725//protein tyrosine phosphatase activity;GO:0004725//protein tyrosine phosphatase activity;GO:0008138//protein tyrosine/serine/threonine phosphatase activity;GO:0008138//protei…	ko04113(Meiosis - yeast);ko04111(Cell cycle - yeast);ko04110(Cell cycle)
ENSGALG00000003747	190.931	162.52	219.342	1.34963	0.432559	0.00418702	0.469911	Nodiff	Z	12167208	12182395	+	3588	-	GO:0004896;GO:0005515;GO:0016020;	K05057	-	S;T	2QWRV;390EC;3BBSB;3CW8D;482UT;497T4;4GQQX	oncostatin M receptor [Source:NCBI gene;Acc:427446]	427446	-	-	GO:0016020//membrane;	GO:0004896//cytokine receptor activity;GO:0005515//protein binding;	ko04630(JAK-STAT signaling pathway);ko04151(PI3K-Akt signaling pathway);ko04060(Cytokine-cytokine receptor interaction)
ENSGALG00000051469	23.8173	32.7681	14.8664	0.453685	-1.14024	0.00422931	0.469911	Down Regulation	30	1033306	1035393	-	461	-	GO:0016491;GO:0016491;	-	-	-	-	-	-	-	-	-	GO:0016491//oxidoreductase activity;GO:0016491//oxidoreductase activity;	-
ENSGALG00000004306	764.393	839.518	689.268	0.821029	-0.284495	0.00423869	0.469911	Nodiff	5	1709027	1716094	-	2527	SYT12	GO:0016020;GO:0046928;GO:0060291;	K19912	-	T;S;U	KOG1028;38TEH;3BB7Z;3D1IA;481F2;48V66;4GI89	synaptotagmin 12 [Source:NCBI gene;Acc:422998]	422998	E1BY95	GO:0046928//regulation of neurotransmitter secretion;GO:0060291//long-term synaptic potentiation;	GO:0016020//membrane;	-	-
ENSGALG00000030719	181.26	209.277	153.243	0.732251	-0.44959	0.00426123	0.469911	Nodiff	5	46093745	46160385	-	2658	CLMN	GO:0005515;GO:0005737;GO:0008285;GO:0031175;	-	-	-	-	calmin [Source:NCBI gene;Acc:100858625]	-	-	GO:0008285//negative regulation of cell population proliferation;GO:0031175//neuron projection development;	GO:0005737//cytoplasm;	GO:0005515//protein binding;	-
ENSGALG00000017378	169.827	202.978	136.675	0.673349	-0.570574	0.00430613	0.471478	Nodiff	6	23234581	23244586	+	2488	CRTAC1	GO:0005509;	-	-	S;T	2QQ5V;398XE;3BH1H;3CZ9Q;486C7;48W2B;4GRA6	cartilage acidic protein 1 [Source:NCBI gene;Acc:425346]	425346	A1XF95	-	-	GO:0005509//calcium ion binding;	-
ENSGALG00000001849	4021.83	4554.16	3489.51	0.766226	-0.384158	0.00433441	0.471478	Nodiff	12	2917890	2962756	-	10881	BSN	GO:0007416;GO:0007416;GO:0009986;GO:0009987;GO:0014069;GO:0030424;GO:0030424;GO:0030425;GO:0035418;GO:0035418;GO:0042995;GO:0043226;GO:0044306;GO:0045202;GO:0045202;GO:0045202;GO:0046872;GO:0046872;GO:0046872;GO:0048786;GO:0048786;GO:0048786;GO:0048786;GO:0048788;GO:0048790;GO:0098685;GO:0098693;GO:0098793;GO:0098831;GO:0098882;GO:0098882;GO:0098978;GO:0098978;GO:0098982;GO:0098982;GO:0099526;GO:…	-	-	S	2QSYS;38P3D;3BFV8;3CY9H;483M5;497EE;4GPZI	bassoon presynaptic cytomatrix protein [Source:HGNC Symbol;Acc:HGNC:1117]	-	-	GO:0007416//synapse assembly;GO:0007416//synapse assembly;GO:0009987//cellular process;GO:0035418//protein localization to synapse;GO:0035418//protein localization to synapse;GO:0048790//maintenance of presynaptic active zone structure;GO:0098693//regulation of synaptic vesicle cycle;GO:0099526//presynapse to nucleus signaling pathway;GO:1904071//presynaptic active zone assembly;	GO:0009986//cell surface;GO:0014069//postsynaptic density;GO:0030424//axon;GO:0030424//axon;GO:0030425//dendrite;GO:0042995//cell projection;GO:0043226//organelle;GO:0044306//neuron projection terminus;GO:0045202//synapse;GO:0045202//synapse;GO:0045202//synapse;GO:0048786//presynaptic active zone;GO:0048786//presynaptic active zone;GO:0048786//presynaptic active zone;GO:0048786//presynaptic activ…	GO:0046872//metal ion binding;GO:0046872//metal ion binding;GO:0046872//metal ion binding;GO:0098882//structural constituent of presynaptic active zone;GO:0098882//structural constituent of presynaptic active zone;	-
ENSGALG00000008947	281.18	320.303	242.056	0.755709	-0.404098	0.00448529	0.484593	Nodiff	3	13939800	14041253	+	3019	PAK5	GO:0004672;GO:0004674;GO:0005524;GO:0006468;GO:0006915;GO:0007010;GO:0004672;GO:0004674;GO:0004674;GO:0005524;GO:0005654;GO:0005739;GO:0006468;GO:0006915;GO:0007010;GO:0007612;GO:0007613;GO:0007626;GO:0045202;GO:2001237;	K05736	EC:2.7.11.1	T;F	KOG0578;38BDT;3BA4Y;3CS12;486BD;48WZA;4GRIN	p21 (RAC1) activated kinase 5 [Source:NCBI gene;Acc:416734]	416734	-	GO:0006468//protein phosphorylation;GO:0006915//apoptotic process;GO:0007010//cytoskeleton organization;GO:0006468//protein phosphorylation;GO:0006915//apoptotic process;GO:0007010//cytoskeleton organization;GO:0007612//learning;GO:0007613//memory;GO:0007626//locomotory behavior;GO:2001237//negative regulation of extrinsic apoptotic signaling pathway;	GO:0005654//nucleoplasm;GO:0005739//mitochondrion;GO:0045202//synapse;	GO:0004672//protein kinase activity;GO:0004674//protein serine/threonine kinase activity;GO:0005524//ATP binding;GO:0004672//protein kinase activity;GO:0004674//protein serine/threonine kinase activity;GO:0004674//protein serine/threonine kinase activity;GO:0005524//ATP binding;	ko05211(Renal cell carcinoma);ko05170(Human immunodeficiency virus 1 infection);ko04810(Regulation of actin cytoskeleton);ko04660(T cell receptor signaling pathway);ko04510(Focal adhesion);ko04360(Axon guidance);ko04014(Ras signaling pathway);ko04012(ErbB signaling pathway)
ENSGALG00000023131	1282.31	1414.87	1149.76	0.812625	-0.299339	0.00465167	0.497793	Nodiff	1	51181690	51185095	-	2160	PDXP	GO:0000287;GO:0004721;GO:0005829;GO:0005886;GO:0005911;GO:0006470;GO:0007088;GO:0015629;GO:0016311;GO:0016311;GO:0016791;GO:0030027;GO:0030496;GO:0030836;GO:0031072;GO:0031247;GO:0032154;GO:0032361;GO:0032361;GO:0032465;GO:0032587;GO:0033883;GO:0033883;GO:0042803;GO:0070938;GO:0071318;	K07758	EC:3.1.3.74	G;P	KOG2882;38E0U;3BKYK;3CXMT;480K7;490DJ;4GRKT	pyridoxal phosphatase [Source:NCBI gene;Acc:771207]	771207	F1NC58	GO:0006470//protein dephosphorylation;GO:0007088//regulation of mitotic nuclear division;GO:0016311//dephosphorylation;GO:0016311//dephosphorylation;GO:0030836//positive regulation of actin filament depolymerization;GO:0031247//actin rod assembly;GO:0032361//pyridoxal phosphate catabolic process;GO:0032361//pyridoxal phosphate catabolic process;GO:0032465//regulation of cytokinesis;GO:0071318//ce…	GO:0005829//cytosol;GO:0005886//plasma membrane;GO:0005911//cell-cell junction;GO:0015629//actin cytoskeleton;GO:0030027//lamellipodium;GO:0030496//midbody;GO:0032154//cleavage furrow;GO:0032587//ruffle membrane;GO:0070938//contractile ring;	GO:0000287//magnesium ion binding;GO:0004721//phosphoprotein phosphatase activity;GO:0016791//phosphatase activity;GO:0031072//heat shock protein binding;GO:0033883//pyridoxal phosphatase activity;GO:0033883//pyridoxal phosphatase activity;GO:0042803//protein homodimerization activity;	ko00750(Vitamin B6 metabolism)
ENSGALG00000031440	1812.04	1978.2	1645.88	0.832009	-0.26533	0.00466973	0.497793	Nodiff	23	2911566	3132209	+	6037	PTPRU	GO:0004725;GO:0005515;GO:0006470;GO:0016020;GO:0016311;GO:0016791;GO:0004725;GO:0005515;GO:0006470;GO:0016020;GO:0016311;GO:0016791;GO:0004725;GO:0004725;GO:0005515;GO:0005911;GO:0006470;GO:0006470;GO:0008013;GO:0008013;GO:0008285;GO:0016020;GO:0016311;GO:0016791;GO:0030336;GO:0034109;GO:0034394;GO:0090090;GO:2000049;GO:0004721;GO:0004725;GO:0004725;GO:0004725;GO:0004725;GO:0005515;GO:0006470;GO:…	K16662	EC:3.1.3.48	-	-	protein tyrosine phosphatase, receptor type U [Source:NCBI gene;Acc:395153]	395153	Q6YI48	GO:0006470//protein dephosphorylation;GO:0016311//dephosphorylation;GO:0006470//protein dephosphorylation;GO:0016311//dephosphorylation;GO:0006470//protein dephosphorylation;GO:0006470//protein dephosphorylation;GO:0008285//negative regulation of cell population proliferation;GO:0016311//dephosphorylation;GO:0030336//negative regulation of cell migration;GO:0034109//homotypic cell-cell adhesion;G…	GO:0016020//membrane;GO:0016020//membrane;GO:0005911//cell-cell junction;GO:0016020//membrane;GO:0016020//membrane;GO:0016020//membrane;GO:0016020//membrane;GO:0016021//integral component of membrane;	GO:0004725//protein tyrosine phosphatase activity;GO:0005515//protein binding;GO:0016791//phosphatase activity;GO:0004725//protein tyrosine phosphatase activity;GO:0005515//protein binding;GO:0016791//phosphatase activity;GO:0004725//protein tyrosine phosphatase activity;GO:0004725//protein tyrosine phosphatase activity;GO:0005515//protein binding;GO:0008013//beta-catenin binding;GO:0008013//beta…	-
ENSGALG00000005400	763.845	689.224	838.467	1.21654	0.282783	0.00483251	0.511734	Nodiff	12	7720781	8130930	+	4244	CACNA2D3	-	K04860	-	P;S;T	KOG2353;38H7U;3B9G8;3CU8E;482FW;4944K;4GJ2K	calcium voltage-gated channel auxiliary subunit alpha2delta 3 [Source:NCBI gene;Acc:415996]	415996	-	-	-	-	ko05414(Dilated cardiomyopathy);ko05412(Arrhythmogenic right ventricular cardiomyopathy);ko05410(Hypertrophic cardiomyopathy);ko04921(Oxytocin signaling pathway);ko04261(Adrenergic signaling in cardiomyocytes);ko04260(Cardiac muscle contraction);ko04010(MAPK signaling pathway)
ENSGALG00000052512	19.8184	9.86235	29.7744	3.019	1.59407	0.00501033	0.526126	Up Regulation	6	34153579	34156676	+	1235	NPS	GO:0005576;GO:0005576;GO:0007218;GO:0007218;GO:0008542;GO:0032230;GO:0032230;GO:0045760;GO:0045760;GO:0051968;GO:0051968;	-	-	-	-	neuropeptide S [Source:HGNC Symbol;Acc:HGNC:33940]	-	-	GO:0007218//neuropeptide signaling pathway;GO:0007218//neuropeptide signaling pathway;GO:0008542//visual learning;GO:0032230//positive regulation of synaptic transmission, GABAergic;GO:0032230//positive regulation of synaptic transmission, GABAergic;GO:0045760//positive regulation of action potential;GO:0045760//positive regulation of action potential;GO:0051968//positive regulation of synaptic t…	GO:0005576//extracellular region;GO:0005576//extracellular region;	-	-
ENSGALG00000032415	3172.33	3497.87	2846.78	0.81386	-0.297148	0.00503422	0.526126	Nodiff	15	7396827	7423399	+	4025	SEZ6L	-	-	-	-	-	seizure related 6 homolog like [Source:NCBI gene;Acc:416906]	-	-	-	-	-	-
ENSGALG00000002289	175.194	122.931	227.458	1.8503	0.887757	0.00510464	0.528251	Nodiff	6	3650070	3681305	-	2218	CHAT	GO:0016746;	K00623	EC:2.3.1.6	I	KOG3717;38CAT;3BAAZ;3CRF9;489SS;49355;4GR94	choline O-acetyltransferase [Source:NCBI gene;Acc:395314]	395314	Q90YJ9	-	-	GO:0016746//acyltransferase activity;	ko04725(Cholinergic synapse);ko00564(Glycerophospholipid metabolism)
ENSGALG00000020151	16.4726	7.96437	24.9809	3.13658	1.64919	0.00514582	0.528251	Up Regulation	4	65036791	65049180	+	1674	NMU	GO:0001659;GO:0006940;GO:0007218;GO:0031839;GO:0031840;GO:0042922;GO:0060259;GO:0097009;GO:2000821;GO:0006940;GO:0042922;	K05249	-	S	2S36R;39P08;3CQIK;3E6RE;48SBG;49NUA;4GR4G	neuromedin U [Source:NCBI gene;Acc:422748]	422748	F1NEH2	GO:0001659//temperature homeostasis;GO:0006940//regulation of smooth muscle contraction;GO:0007218//neuropeptide signaling pathway;GO:0060259//regulation of feeding behavior;GO:0097009//energy homeostasis;GO:2000821//regulation of grooming behavior;GO:0006940//regulation of smooth muscle contraction;	-	GO:0031839//type 1 neuromedin U receptor binding;GO:0031840//type 2 neuromedin U receptor binding;GO:0042922//neuromedin U receptor binding;GO:0042922//neuromedin U receptor binding;	ko04080(Neuroactive ligand-receptor interaction)
ENSGALG00000027122	685.198	616.003	754.392	1.22466	0.292377	0.00517903	0.528251	Nodiff	1	54211821	54244951	+	3543	APPL2	GO:0001726;GO:0001786;GO:0002024;GO:0005634;GO:0005737;GO:0005768;GO:0005886;GO:0005886;GO:0006606;GO:0007179;GO:0009631;GO:0010008;GO:0010762;GO:0016020;GO:0031410;GO:0031982;GO:0032009;GO:0032587;GO:0033211;GO:0034143;GO:0035091;GO:0035729;GO:0036186;GO:0042593;GO:0042802;GO:0042803;GO:0044354;GO:0044877;GO:0045088;GO:0046322;GO:0046325;GO:0046325;GO:0050768;GO:0051289;GO:0060100;GO:0120162;GO:…	K20132	-	S;U;T	KOG0521;KOG3536;38I2P;3BIU5;3CX5H;486TA;492U3;4GNME	adaptor protein, phosphotyrosine interacting with PH domain and leucine zipper 2 [Source:NCBI gene;Acc:418075]	418075	-	GO:0002024//diet induced thermogenesis;GO:0006606//protein import into nucleus;GO:0007179//transforming growth factor beta receptor signaling pathway;GO:0009631//cold acclimation;GO:0010762//regulation of fibroblast migration;GO:0033211//adiponectin-activated signaling pathway;GO:0034143//regulation of toll-like receptor 4 signaling pathway;GO:0035729//cellular response to hepatocyte growth facto…	GO:0001726//ruffle;GO:0005634//nucleus;GO:0005737//cytoplasm;GO:0005768//endosome;GO:0005886//plasma membrane;GO:0005886//plasma membrane;GO:0010008//endosome membrane;GO:0016020//membrane;GO:0031410//cytoplasmic vesicle;GO:0031982//vesicle;GO:0032009//early phagosome;GO:0032587//ruffle membrane;GO:0036186//early phagosome membrane;GO:0044354//macropinosome;GO:0001726//ruffle;GO:0005634//nucleus;…	GO:0001786//phosphatidylserine binding;GO:0035091//phosphatidylinositol binding;GO:0042802//identical protein binding;GO:0042803//protein homodimerization activity;GO:0044877//protein-containing complex binding;	-
ENSGALG00000003775	739.503	656.272	822.733	1.25365	0.32613	0.00518671	0.528251	Nodiff	Z	12187279	12262599	-	5244	RICTOR	GO:0001932;GO:0009792;GO:0010468;GO:0018105;GO:0019901;GO:0030838;GO:0031532;GO:0031929;GO:0031932;GO:0031932;GO:0031932;GO:0032008;GO:0032956;GO:0033135;GO:0043022;GO:0043087;GO:0050727;GO:0050731;GO:0051896;GO:0051896;GO:2000114;GO:0031929;GO:0031932;	K08267	-	L;D	KOG3694;38EJZ;3BA9C;3CRRJ;483PS;494SI;4GMD5	RPTOR independent companion of MTOR complex 2 [Source:NCBI gene;Acc:427447]	427447	F1NMJ6	GO:0001932//regulation of protein phosphorylation;GO:0009792//embryo development ending in birth or egg hatching;GO:0010468//regulation of gene expression;GO:0018105//peptidyl-serine phosphorylation;GO:0030838//positive regulation of actin filament polymerization;GO:0031532//actin cytoskeleton reorganization;GO:0031929//TOR signaling;GO:0032008//positive regulation of TOR signaling;GO:0032956//re…	GO:0031932//TORC2 complex;GO:0031932//TORC2 complex;GO:0031932//TORC2 complex;GO:0031932//TORC2 complex;	GO:0019901//protein kinase binding;GO:0043022//ribosome binding;	ko04150(mTOR signaling pathway)
ENSGALG00000032750	1955.46	2169.89	1741.04	0.802363	-0.317673	0.00522453	0.528735	Nodiff	26	1165982	1185894	+	9188	CELSR2	GO:0001764;GO:0003341;GO:0004888;GO:0004930;GO:0005509;GO:0005737;GO:0005886;GO:0005886;GO:0006355;GO:0007155;GO:0007156;GO:0007156;GO:0007166;GO:0007186;GO:0016020;GO:0016021;GO:0016055;GO:0021591;GO:0021999;GO:0032880;GO:0033326;GO:0060271;GO:0004888;GO:0004930;GO:0005509;GO:0005886;GO:0007155;GO:0007156;GO:0007166;GO:0007186;GO:0016020;GO:0016021;	-	-	-	-	cadherin EGF LAG seven-pass G-type receptor 2 [Source:NCBI gene;Acc:430126]	-	-	GO:0001764//neuron migration;GO:0003341//cilium movement;GO:0006355//regulation of transcription, DNA-templated;GO:0007155//cell adhesion;GO:0007156//homophilic cell adhesion via plasma membrane adhesion molecules;GO:0007156//homophilic cell adhesion via plasma membrane adhesion molecules;GO:0007166//cell surface receptor signaling pathway;GO:0007186//G protein-coupled receptor signaling pathway;…	GO:0005737//cytoplasm;GO:0005886//plasma membrane;GO:0005886//plasma membrane;GO:0016020//membrane;GO:0016021//integral component of membrane;GO:0005886//plasma membrane;GO:0016020//membrane;GO:0016021//integral component of membrane;	GO:0004888//transmembrane signaling receptor activity;GO:0004930//G protein-coupled receptor activity;GO:0005509//calcium ion binding;GO:0004888//transmembrane signaling receptor activity;GO:0004930//G protein-coupled receptor activity;GO:0005509//calcium ion binding;	-
ENSGALG00000054968	69.1721	84.3347	54.0095	0.640418	-0.642913	0.0052892	0.531914	Nodiff	1	133835962	133838443	-	1332	-	GO:0003796;GO:0009253;GO:0016998;	-	-	-	-	lysozyme g-like [Source:NCBI gene;Acc:418701]	-	-	GO:0009253//peptidoglycan catabolic process;GO:0016998//cell wall macromolecule catabolic process;	-	GO:0003796//lysozyme activity;	-
ENSGALG00000008442	1948.95	2111.56	1786.34	0.845979	-0.241306	0.00537908	0.532259	Nodiff	4	15290397	15521568	+	8204	TENM1	GO:0003824;GO:0005886;GO:0005887;GO:0007165;GO:0016021;GO:0042802;GO:0042803;GO:0046982;GO:0003824;GO:0003824;GO:0005886;GO:0007165;GO:0007165;GO:0016020;GO:0016021;GO:0016021;GO:0016021;	K24473	-	T;S	KOG4659;39S2R;3BG22;3CSRC;48ASH;491RH;4GJFV	teneurin transmembrane protein 1 [Source:NCBI gene;Acc:395668]	395668	Q9W6V6	GO:0007165//signal transduction;GO:0007165//signal transduction;GO:0007165//signal transduction;	GO:0005886//plasma membrane;GO:0005887//integral component of plasma membrane;GO:0016021//integral component of membrane;GO:0005886//plasma membrane;GO:0016020//membrane;GO:0016021//integral component of membrane;GO:0016021//integral component of membrane;GO:0016021//integral component of membrane;	GO:0003824//catalytic activity;GO:0042802//identical protein binding;GO:0042803//protein homodimerization activity;GO:0046982//protein heterodimerization activity;GO:0003824//catalytic activity;GO:0003824//catalytic activity;	-
ENSGALG00000017414	1067.51	1163.99	971.031	0.834224	-0.261493	0.0053832	0.532259	Nodiff	27	7477796	7493324	-	3166	JUP	GO:0001954;GO:0002159;GO:0002159;GO:0002159;GO:0002159;GO:0003713;GO:0003713;GO:0005198;GO:0005198;GO:0005515;GO:0005634;GO:0005737;GO:0005737;GO:0005829;GO:0005882;GO:0005886;GO:0005911;GO:0005911;GO:0005912;GO:0005912;GO:0005912;GO:0005912;GO:0005912;GO:0007155;GO:0007155;GO:0007155;GO:0014704;GO:0016020;GO:0016342;GO:0016342;GO:0016342;GO:0016342;GO:0016342;GO:0016477;GO:0019903;GO:0019903;GO:…	K10056	-	T;Z;F	KOG4203;39SKG;3BGPS;3E4CF;4835U;48V0C;4GR7R	junction plakoglobin [Source:NCBI gene;Acc:429710]	429710	E1C1V3	GO:0001954//positive regulation of cell-matrix adhesion;GO:0002159//desmosome assembly;GO:0002159//desmosome assembly;GO:0002159//desmosome assembly;GO:0002159//desmosome assembly;GO:0007155//cell adhesion;GO:0007155//cell adhesion;GO:0007155//cell adhesion;GO:0016477//cell migration;GO:0042127//regulation of cell population proliferation;GO:0042307//positive regulation of protein import into nuc…	GO:0005634//nucleus;GO:0005737//cytoplasm;GO:0005737//cytoplasm;GO:0005829//cytosol;GO:0005882//intermediate filament;GO:0005886//plasma membrane;GO:0005911//cell-cell junction;GO:0005911//cell-cell junction;GO:0005912//adherens junction;GO:0005912//adherens junction;GO:0005912//adherens junction;GO:0005912//adherens junction;GO:0005912//adherens junction;GO:0014704//intercalated disc;GO:0016020/…	GO:0003713//transcription coactivator activity;GO:0003713//transcription coactivator activity;GO:0005198//structural molecule activity;GO:0005198//structural molecule activity;GO:0005515//protein binding;GO:0019903//protein phosphatase binding;GO:0019903//protein phosphatase binding;GO:0045294//alpha-catenin binding;GO:0045294//alpha-catenin binding;GO:0045294//alpha-catenin binding;GO:0045294//a…	ko05412(Arrhythmogenic right ventricular cardiomyopathy);ko05226(Gastric cancer);ko05221(Acute myeloid leukemia);ko05202(Transcriptional misregulation in cancer);ko05200(Pathways in cancer)
ENSGALG00000002904	2736.78	2516.58	2956.99	1.17501	0.232667	0.00541403	0.532259	Nodiff	6	8461693	8499207	-	4594	REEP3	GO:0006998;GO:0007084;	K17338	-	V;U	KOG1726;39TEP;3BDQZ;3CRS2;488QX;48UVC;4GJ3T	receptor accessory protein 3 [Source:NCBI gene;Acc:423654]	423654	F1NBY2	GO:0006998//nuclear envelope organization;GO:0007084//mitotic nuclear membrane reassembly;	-	-	-
ENSGALG00000008263	1552.85	1684.59	1421.11	0.84359	-0.245386	0.00542578	0.532259	Nodiff	12	18230670	18486808	+	3596	CNTN4	GO:0005515;GO:0005886;GO:0007155;GO:0007411;GO:0005515;GO:0005886;GO:0005886;GO:0005886;GO:0007155;GO:0007155;GO:0007156;GO:0007399;GO:0007411;GO:0007411;GO:0007411;GO:0030424;GO:0045665;GO:0070593;GO:0098632;	K06762	-	S;T	KOG3513;38C7V;3B984;3CS11;480FX;48ZR3;4GU87	contactin 4 [Source:NCBI gene;Acc:396149]	396149	F1P3U6	GO:0007155//cell adhesion;GO:0007411//axon guidance;GO:0007155//cell adhesion;GO:0007155//cell adhesion;GO:0007156//homophilic cell adhesion via plasma membrane adhesion molecules;GO:0007399//nervous system development;GO:0007411//axon guidance;GO:0007411//axon guidance;GO:0007411//axon guidance;GO:0045665//negative regulation of neuron differentiation;GO:0070593//dendrite self-avoidance;	GO:0005886//plasma membrane;GO:0005886//plasma membrane;GO:0005886//plasma membrane;GO:0005886//plasma membrane;GO:0030424//axon;	GO:0005515//protein binding;GO:0005515//protein binding;GO:0098632//cell-cell adhesion mediator activity;	-
ENSGALG00000001740	859.362	940.415	778.309	0.827622	-0.272955	0.00555438	0.537765	Nodiff	18	4171183	4209840	-	1455	MGAT5B	GO:0000139;GO:0005794;GO:0005794;GO:0005794;GO:0006486;GO:0006487;GO:0006487;GO:0006487;GO:0006487;GO:0016020;GO:0016021;GO:0016740;GO:0016757;GO:0018242;GO:0030144;GO:0030144;GO:0030144;GO:0030144;GO:0030144;GO:0030144;GO:0030144;GO:0030145;	K09661	EC:2.4.1.-	S	2QWJG;39E40;3BCXN;3DFKB;48J16;490VZ;4GNRF	alpha-1,6-mannosylglycoprotein 6-beta-N- acetylglucosaminyltransferase B [Source:HGNC Symbol;Acc:HGNC:24140]	427801	-	GO:0006486//protein glycosylation;GO:0006487//protein N-linked glycosylation;GO:0006487//protein N-linked glycosylation;GO:0006487//protein N-linked glycosylation;GO:0006487//protein N-linked glycosylation;GO:0018242//protein O-linked glycosylation via serine;	GO:0000139//Golgi membrane;GO:0005794//Golgi apparatus;GO:0005794//Golgi apparatus;GO:0005794//Golgi apparatus;GO:0016020//membrane;GO:0016021//integral component of membrane;	GO:0016740//transferase activity;GO:0016757//glycosyltransferase activity;GO:0030144//alpha-1,6-mannosylglycoprotein 6-beta-N-acetylglucosaminyltransferase activity;GO:0030144//alpha-1,6-mannosylglycoprotein 6-beta-N-acetylglucosaminyltransferase activity;GO:0030144//alpha-1,6-mannosylglycoprotein 6-beta-N-acetylglucosaminyltransferase activity;GO:0030144//alpha-1,6-mannosylglycoprotein 6-beta-N-…	ko00515(Mannose type O-glycan biosynthesis);ko00510(N-Glycan biosynthesis)
ENSGALG00000031313	435.733	491.363	380.104	0.773571	-0.370395	0.00555884	0.537765	Nodiff	10	2064918	2075635	-	1846	-	GO:0003676;GO:0003723;GO:0003676;GO:0003723;	K13207	-	-	-	CUGBP, Elav-like family member 6 [Source:NCBI gene;Acc:427479]	427479	-	-	-	GO:0003676//nucleic acid binding;GO:0003723//RNA binding;GO:0003676//nucleic acid binding;GO:0003723//RNA binding;	-
ENSGALG00000010386	251.069	283.911	218.226	0.768642	-0.379617	0.005619	0.537765	Nodiff	3	31101931	31106033	+	1191	DLK2	GO:0005509;GO:0042802;GO:0045598;GO:0045746;GO:0045746;	K24462	-	O;T	KOG1217;38HR3;3BJUZ;3CXYZ;482UB;490U7;4GQ16	delta like non-canonical Notch ligand 2 [Source:NCBI gene;Acc:428576]	428576	-	GO:0045598//regulation of fat cell differentiation;GO:0045746//negative regulation of Notch signaling pathway;GO:0045746//negative regulation of Notch signaling pathway;	-	GO:0005509//calcium ion binding;GO:0042802//identical protein binding;	-
ENSGALG00000033405	1518.42	1645.55	1391.29	0.845483	-0.242153	0.00565149	0.537765	Nodiff	13	10862418	10871777	-	2224	DBN1	GO:0003779;GO:0003779;GO:0003779;GO:0005737;GO:0005884;GO:0005886;GO:0005938;GO:0007015;GO:0007015;GO:0007399;GO:0014069;GO:0030027;GO:0030054;GO:0030154;GO:0030425;GO:0030425;GO:0030426;GO:0030427;GO:0030833;GO:0030864;GO:0042995;GO:0045211;GO:0045773;GO:0048812;GO:0051015;GO:0061003;GO:0098974;GO:0003779;GO:0003779;GO:0003779;GO:0005737;GO:0005737;GO:0005856;GO:0005884;GO:0005886;GO:0005886;GO:…	K25391	-	-	-	drebrin 1 [Source:NCBI gene;Acc:396496]	396496	P18302	GO:0007015//actin filament organization;GO:0007015//actin filament organization;GO:0007399//nervous system development;GO:0030154//cell differentiation;GO:0030833//regulation of actin filament polymerization;GO:0045773//positive regulation of axon extension;GO:0048812//neuron projection morphogenesis;GO:0061003//positive regulation of dendritic spine morphogenesis;GO:0098974//postsynaptic actin c…	GO:0005737//cytoplasm;GO:0005884//actin filament;GO:0005886//plasma membrane;GO:0005938//cell cortex;GO:0014069//postsynaptic density;GO:0030027//lamellipodium;GO:0030054//cell junction;GO:0030425//dendrite;GO:0030425//dendrite;GO:0030426//growth cone;GO:0030427//site of polarized growth;GO:0030864//cortical actin cytoskeleton;GO:0042995//cell projection;GO:0045211//postsynaptic membrane;GO:00057…	GO:0003779//actin binding;GO:0003779//actin binding;GO:0003779//actin binding;GO:0051015//actin filament binding;GO:0003779//actin binding;GO:0003779//actin binding;GO:0003779//actin binding;GO:0051015//actin filament binding;	-
ENSGALG00000007780	467.334	361.129	573.539	1.58818	0.667378	0.00568185	0.537765	Nodiff	12	16666749	16682429	-	2006	EIF4E3	GO:0003723;GO:0003743;GO:0006413;GO:0003723;GO:0003743;GO:0006413;	-	-	J	2QPP4;38GWC;3BCZ4;3CVHI;483X6;48Y13;4GNY8	eukaryotic translation initiation factor 4E family member 3 [Source:NCBI gene;Acc:416093]	416093	F7BFT4	GO:0006413//translational initiation;GO:0006413//translational initiation;	-	GO:0003723//RNA binding;GO:0003743//translation initiation factor activity;GO:0003723//RNA binding;GO:0003743//translation initiation factor activity;	-
ENSGALG00000011350	1259.36	1370.75	1147.98	0.837487	-0.255861	0.00568626	0.537765	Nodiff	8	29514747	29680796	-	3528	NEGR1	GO:0005886;GO:0007626;GO:0007631;GO:0010976;GO:0098609;	K06775	-	S;T	KOG3510;38SYA;3BFG7;3CWH6;47Z2J;494F2;4GHM4	neuronal growth regulator 1 [Source:NCBI gene;Acc:395662]	395662	Q9W6V2	GO:0007626//locomotory behavior;GO:0007631//feeding behavior;GO:0010976//positive regulation of neuron projection development;GO:0098609//cell-cell adhesion;	GO:0005886//plasma membrane;	-	ko04514(Cell adhesion molecules)
ENSGALG00000037812	321.463	389.889	253.038	0.649001	-0.623708	0.00573385	0.537765	Nodiff	18	2202453	2210330	+	3772	USP43	GO:0004843;GO:0006511;GO:0016579;	-	-	-	-	ubiquitin specific peptidase 43 [Source:NCBI gene;Acc:101751148]	-	-	GO:0006511//ubiquitin-dependent protein catabolic process;GO:0016579//protein deubiquitination;	-	GO:0004843//thiol-dependent deubiquitinase;	-
ENSGALG00000000337	314.36	352.494	276.225	0.78363	-0.351756	0.00579605	0.537765	Nodiff	28	506848	508022	-	237	CTXN1	GO:0016020;GO:0016021;	-	-	S	2S3S8;3A6JS;3BT8Q;3D99A;48F7G;49C65;4GVEB	cortexin 1 [Source:HGNC Symbol;Acc:HGNC:31108]	-	-	-	GO:0016020//membrane;GO:0016021//integral component of membrane;	-	-
ENSGALG00000001442	1963.95	2147.04	1780.86	0.82945	-0.269774	0.00583796	0.537765	Nodiff	24	2144948	2396494	-	1624	OPCML	-	K06773	-	-	-	opioid binding protein/cell adhesion molecule like [Source:NCBI gene;Acc:395422]	395422	Q9DF61	-	-	-	-
ENSGALG00000043764	412.629	459.862	365.396	0.794577	-0.331742	0.00584349	0.537765	Nodiff	2	127547149	127548766	+	1618	KCNS2	GO:0005216;GO:0005249;GO:0005515;GO:0005886;GO:0006811;GO:0006813;GO:0006813;GO:0008076;GO:0008076;GO:0016020;GO:0048471;GO:0051260;GO:0055085;GO:1902259;	K04932	-	-	-	potassium voltage-gated channel modifier subfamily S member 2 [Source:NCBI gene;Acc:430463]	430463	A0A1D5PCF8	GO:0006811//ion transport;GO:0006813//potassium ion transport;GO:0006813//potassium ion transport;GO:0051260//protein homooligomerization;GO:0055085//transmembrane transport;GO:1902259//regulation of delayed rectifier potassium channel activity;	GO:0005886//plasma membrane;GO:0008076//voltage-gated potassium channel complex;GO:0008076//voltage-gated potassium channel complex;GO:0016020//membrane;GO:0048471//perinuclear region of cytoplasm;	GO:0005216//ion channel activity;GO:0005249//voltage-gated potassium channel activity;GO:0005515//protein binding;	-
ENSGALG00000016941	2573.67	2779.25	2368.09	0.852062	-0.230969	0.00585186	0.537765	Nodiff	1	164781979	164862248	-	4036	PCDH17	GO:0005509;GO:0005886;GO:0007155;GO:0007156;GO:0016020;GO:0030534;GO:0050805;GO:0098978;GO:0098982;GO:0099055;GO:0099056;GO:0099560;GO:1904071;GO:2000807;GO:0005509;GO:0005886;GO:0007155;GO:0007156;GO:0016020;	K16499	-	S	KOG3594;38GQN;3BDRY;3CZSQ;486T4;491FF;4GQ2D	protocadherin 17 [Source:NCBI gene;Acc:418825]	418825	F1NXI0	GO:0007155//cell adhesion;GO:0007156//homophilic cell adhesion via plasma membrane adhesion molecules;GO:0030534//adult behavior;GO:0050805//negative regulation of synaptic transmission;GO:0099560//synaptic membrane adhesion;GO:1904071//presynaptic active zone assembly;GO:2000807//regulation of synaptic vesicle clustering;GO:0007155//cell adhesion;GO:0007156//homophilic cell adhesion via plasma m…	GO:0005886//plasma membrane;GO:0016020//membrane;GO:0098978//glutamatergic synapse;GO:0098982//GABA-ergic synapse;GO:0099055//integral component of postsynaptic membrane;GO:0099056//integral component of presynaptic membrane;GO:0005886//plasma membrane;GO:0016020//membrane;	GO:0005509//calcium ion binding;GO:0005509//calcium ion binding;	-
ENSGALG00000011434	34.8446	45.1775	24.5117	0.542565	-0.882133	0.0060268	0.540049	Nodiff	7	22547805	22552363	-	1750	SLC11A1	GO:0001818;GO:0001819;GO:0002309;GO:0002606;GO:0002827;GO:0005381;GO:0005384;GO:0005384;GO:0005385;GO:0005635;GO:0005764;GO:0005770;GO:0005886;GO:0005886;GO:0005886;GO:0005886;GO:0006811;GO:0006826;GO:0006826;GO:0006828;GO:0006829;GO:0006876;GO:0006876;GO:0006876;GO:0006879;GO:0006879;GO:0006879;GO:0006909;GO:0006954;GO:0007035;GO:0009617;GO:0009617;GO:0010008;GO:0010628;GO:0015086;GO:0015086;GO:…	K12347	-	P	KOG1291;38C14;3BAFJ;3CT65;48BR2;4986C;4GM4C	solute carrier family 11 member 1 [Source:NCBI gene;Acc:395811]	395811	P51027	GO:0001818//negative regulation of cytokine production;GO:0001819//positive regulation of cytokine production;GO:0002309//T cell proliferation involved in immune response;GO:0002606//positive regulation of dendritic cell antigen processing and presentation;GO:0002827//positive regulation of T-helper 1 type immune response;GO:0006811//ion transport;GO:0006826//iron ion transport;GO:0006826//iron i…	GO:0005635//nuclear envelope;GO:0005764//lysosome;GO:0005770//late endosome;GO:0005886//plasma membrane;GO:0005886//plasma membrane;GO:0005886//plasma membrane;GO:0005886//plasma membrane;GO:0010008//endosome membrane;GO:0016020//membrane;GO:0016020//membrane;GO:0016020//membrane;GO:0016021//integral component of membrane;GO:0030670//phagocytic vesicle membrane;GO:0030670//phagocytic vesicle memb…	GO:0005381//iron ion transmembrane transporter activity;GO:0005384//manganese ion transmembrane transporter activity;GO:0005384//manganese ion transmembrane transporter activity;GO:0005385//zinc ion transmembrane transporter activity;GO:0015086//cadmium ion transmembrane transporter activity;GO:0015086//cadmium ion transmembrane transporter activity;GO:0042803//protein homodimerization activity;G…	ko04142(Lysosome)
ENSGALG00000030561	143.236	166.672	119.799	0.71877	-0.476397	0.00605307	0.540049	Nodiff	17	651627	665120	-	1310	-	GO:0004672;GO:0005524;GO:0006468;	-	-	-	-	dual specificity testis-specific protein kinase 1- like [Source:NCBI gene;Acc:427783]	427783	A0A1D5NWH0	GO:0006468//protein phosphorylation;	-	GO:0004672//protein kinase activity;GO:0005524//ATP binding;	-
ENSGALG00000005842	14.8009	21.7745	7.82731	0.359471	-1.47605	0.00607538	0.540049	Down Regulation	4	2531208	2539175	-	2426	GDPD2	GO:0005884;GO:0005886;GO:0006629;GO:0008081;GO:0030027;GO:0045669;GO:0090527;	K01124	EC:3.1.4.43	-	-	glycerophosphodiester phosphodiesterase domain containing 2 [Source:NCBI gene;Acc:422217]	422217	A0A1D5P5T7	GO:0006629//lipid metabolic process;GO:0045669//positive regulation of osteoblast differentiation;GO:0090527//actin filament reorganization;	GO:0005884//actin filament;GO:0005886//plasma membrane;GO:0030027//lamellipodium;	GO:0008081//phosphoric diester hydrolase activity;	-
ENSGALG00000011809	1010.42	1181.83	839.004	0.709922	-0.494268	0.00610965	0.540049	Nodiff	1	48468643	48670570	-	6071	GRIN2B	GO:0004970;GO:0004972;GO:0005216;GO:0005886;GO:0005887;GO:0006811;GO:0015276;GO:0016020;GO:0016594;GO:0017146;GO:0022849;GO:0038023;GO:0045471;GO:0097553;	-	-	T;E;U;P	KOG1053;38D86;3BBB7;3CRTW;480YF;48WQ1;4GP8A	glutamate ionotropic receptor NMDA type subunit 2B [Source:NCBI gene;Acc:417965]	-	-	GO:0006811//ion transport;GO:0045471//response to ethanol;GO:0097553//calcium ion transmembrane import into cytosol;	GO:0005886//plasma membrane;GO:0005887//integral component of plasma membrane;GO:0016020//membrane;GO:0017146//NMDA selective glutamate receptor complex;	GO:0004970//ionotropic glutamate receptor activity;GO:0004972//NMDA glutamate receptor activity;GO:0005216//ion channel activity;GO:0015276//ligand-gated ion channel activity;GO:0016594//glycine binding;GO:0022849//glutamate-gated calcium ion channel activity;GO:0038023//signaling receptor activity;	-
ENSGALG00000014159	2570.49	2366.53	2774.46	1.17238	0.229438	0.00613095	0.540049	Nodiff	1	68405048	68468405	-	3445	PACSIN2	GO:0005515;GO:0005737;GO:0005829;GO:0005829;GO:0005886;GO:0005901;GO:0005901;GO:0005911;GO:0008092;GO:0008289;GO:0016607;GO:0019898;GO:0030036;GO:0036010;GO:0042802;GO:0043231;GO:0045806;GO:0048858;GO:0050804;GO:0055038;GO:0070300;GO:0070836;GO:0070836;GO:0072584;GO:0097320;GO:0097320;GO:0097320;GO:0098978;GO:0005515;GO:0030036;GO:0070836;GO:0097320;	K20123	-	T;U;Z	KOG2856;38E74;3BBEB;3CRHF;47ZUA;49591;4GTUW	protein kinase C and casein kinase substrate in neurons 2 [Source:NCBI gene;Acc:395975]	395975	O13154	GO:0030036//actin cytoskeleton organization;GO:0036010//protein localization to endosome;GO:0045806//negative regulation of endocytosis;GO:0048858//cell projection morphogenesis;GO:0050804//modulation of chemical synaptic transmission;GO:0070836//caveola assembly;GO:0070836//caveola assembly;GO:0072584//caveolin-mediated endocytosis;GO:0097320//plasma membrane tubulation;GO:0097320//plasma membra…	GO:0005737//cytoplasm;GO:0005829//cytosol;GO:0005829//cytosol;GO:0005886//plasma membrane;GO:0005901//caveola;GO:0005901//caveola;GO:0005911//cell-cell junction;GO:0016607//nuclear speck;GO:0019898//extrinsic component of membrane;GO:0043231//intracellular membrane-bounded organelle;GO:0055038//recycling endosome membrane;GO:0098978//glutamatergic synapse;	GO:0005515//protein binding;GO:0008092//cytoskeletal protein binding;GO:0008289//lipid binding;GO:0042802//identical protein binding;GO:0070300//phosphatidic acid binding;GO:0005515//protein binding;	-
ENSGALG00000008638	38.2889	27.4479	49.1299	1.78993	0.839907	0.00614193	0.540049	Nodiff	2	19497094	19526728	-	4248	MMR1L3	-	K06560	-	S;T;V	KOG4297;38GR9;3BBE1;3CTZ0;4803E;48X4Q;4GQ4Z	macrophage mannose receptor 1-like 3 [Source:NCBI gene;Acc:420515]	420515	M1XH40	-	-	-	ko05152(Tuberculosis);ko04145(Phagosome)
ENSGALG00000011894	1791.83	1608.47	1975.19	1.228	0.296307	0.00617438	0.540049	Nodiff	1	49408394	49417609	+	2846	CYP2D6	GO:0004497;GO:0004497;GO:0005506;GO:0005739;GO:0006805;GO:0008202;GO:0008210;GO:0009804;GO:0009820;GO:0009822;GO:0016098;GO:0016491;GO:0016705;GO:0016712;GO:0020037;GO:0020037;GO:0033076;GO:0042178;GO:0042572;GO:0046483;GO:0051100;GO:0062187;GO:0062188;GO:0062189;GO:0070989;GO:0090350;	K07414	EC:1.14.14.1	Q	KOG0156;38BSU;3BC78;3CRSA;483V2;48V8F;4GMZ1	cytochrome P450 family 2 subfamily D member 6 [Source:NCBI gene;Acc:417981]	417981	F1NJG4	GO:0006805//xenobiotic metabolic process;GO:0008202//steroid metabolic process;GO:0008210//estrogen metabolic process;GO:0009804//coumarin metabolic process;GO:0009820//alkaloid metabolic process;GO:0009822//alkaloid catabolic process;GO:0016098//monoterpenoid metabolic process;GO:0033076//isoquinoline alkaloid metabolic process;GO:0042178//xenobiotic catabolic process;GO:0042572//retinol metabol…	GO:0005739//mitochondrion;	GO:0004497//monooxygenase activity;GO:0004497//monooxygenase activity;GO:0005506//iron ion binding;GO:0016491//oxidoreductase activity;GO:0016705//oxidoreductase activity, acting on paired donors, with incorporation or reduction of molecular oxygen;GO:0016712//oxidoreductase activity, acting on paired donors, with incorporation or reduction of molecular oxygen, reduced flavin or flavoprotein as o…	ko04726(Serotonergic synapse);ko00140(Steroid hormone biosynthesis)
ENSGALG00000036871	276.36	310.651	242.069	0.779231	-0.359878	0.00619897	0.540049	Nodiff	8	4221758	4251652	-	1932	NOS1AP	GO:0003062;GO:0005739;GO:0005901;GO:0030018;GO:0030315;GO:0033017;GO:0050998;GO:0060307;GO:0098974;GO:0098978;	-	-	-	-	nitric oxide synthase 1 adaptor protein [Source:NCBI gene;Acc:424371]	-	-	GO:0003062//regulation of heart rate by chemical signal;GO:0060307//regulation of ventricular cardiac muscle cell membrane repolarization;GO:0098974//postsynaptic actin cytoskeleton organization;	GO:0005739//mitochondrion;GO:0005901//caveola;GO:0030018//Z disc;GO:0030315//T-tubule;GO:0033017//sarcoplasmic reticulum membrane;GO:0098978//glutamatergic synapse;	GO:0050998//nitric-oxide synthase binding;	-
ENSGALG00000038313	618.027	679.922	556.131	0.817935	-0.289943	0.00621148	0.540049	Nodiff	21	4933765	4936536	-	1139	EFHD2	GO:0005509;	K23922	-	-	-	EF-hand domain family member D2 [Source:NCBI gene;Acc:430669]	430669	-	-	-	GO:0005509//calcium ion binding;	-
ENSGALG00000039125	8.69048	3.76335	13.6176	3.61848	1.85538	0.00621444	0.540049	Up Regulation	27	5506855	5508435	+	437	PPY	GO:0001664;GO:0005179;GO:0005179;GO:0005179;GO:0005179;GO:0005184;GO:0005576;GO:0005576;GO:0005576;GO:0005615;GO:0007218;GO:0007631;GO:0031841;	K05232	-	-	-	pancreatic polypeptide [Source:NCBI gene;Acc:395564]	395564	P68248	GO:0007218//neuropeptide signaling pathway;GO:0007631//feeding behavior;	GO:0005576//extracellular region;GO:0005576//extracellular region;GO:0005576//extracellular region;GO:0005615//extracellular space;	GO:0001664//G protein-coupled receptor binding;GO:0005179//hormone activity;GO:0005179//hormone activity;GO:0005179//hormone activity;GO:0005179//hormone activity;GO:0005184//neuropeptide hormone activity;GO:0031841//neuropeptide Y receptor binding;	ko05034(Alcoholism);ko04923(Regulation of lipolysis in adipocytes);ko04920(Adipocytokine signaling pathway);ko04080(Neuroactive ligand-receptor interaction);ko04024(cAMP signaling pathway)
ENSGALG00000009602	237.952	202.788	273.116	1.34681	0.429541	0.00631785	0.540234	Nodiff	7	18273898	18440953	-	3864	MYO3B	GO:0003774;GO:0004672;GO:0005515;GO:0005524;GO:0006468;GO:0016459;	K08834	EC:2.7.11.1	N;T;Z	KOG0587;KOG4229;38FVQ;3BDUB;3CTXA;4835B;4965V;4GUB0	myosin IIIB [Source:NCBI gene;Acc:424157]	424157	-	GO:0006468//protein phosphorylation;	GO:0016459//myosin complex;	GO:0003774//cytoskeletal motor activity;GO:0004672//protein kinase activity;GO:0005515//protein binding;GO:0005524//ATP binding;	ko04745(Phototransduction - fly)
ENSGALG00000042297	1186.39	1291.8	1080.98	0.836803	-0.257041	0.00635805	0.540234	Nodiff	5	168034	176919	+	4802	ANKRD13D	GO:0002091;GO:0005515;GO:0005737;GO:0005886;GO:0048471;GO:0140036;GO:0003779;GO:0004725;GO:0006470;GO:0008138;GO:0016311;GO:0016791;GO:0030837;GO:0003779;GO:0004725;GO:0006470;GO:0008138;GO:0016311;GO:0016791;GO:0030837;	K21437	-	-	-	ankyrin repeat domain 13D [Source:NCBI gene;Acc:107049270]	107049270	-	GO:0002091//negative regulation of receptor internalization;GO:0006470//protein dephosphorylation;GO:0016311//dephosphorylation;GO:0030837//negative regulation of actin filament polymerization;GO:0006470//protein dephosphorylation;GO:0016311//dephosphorylation;GO:0030837//negative regulation of actin filament polymerization;	GO:0005737//cytoplasm;GO:0005886//plasma membrane;GO:0048471//perinuclear region of cytoplasm;	GO:0005515//protein binding;GO:0140036//ubiquitin-dependent protein binding;GO:0003779//actin binding;GO:0004725//protein tyrosine phosphatase activity;GO:0008138//protein tyrosine/serine/threonine phosphatase activity;GO:0016791//phosphatase activity;GO:0003779//actin binding;GO:0004725//protein tyrosine phosphatase activity;GO:0008138//protein tyrosine/serine/threonine phosphatase activity;GO:0…	-
ENSGALG00000009719	1500.88	1626.59	1375.16	0.845425	-0.242251	0.00637198	0.540234	Nodiff	4	26882271	26914396	+	4516	PCDH10	GO:0005509;GO:0005509;GO:0005509;GO:0005886;GO:0005886;GO:0005887;GO:0007155;GO:0007155;GO:0007155;GO:0007155;GO:0007155;GO:0007156;GO:0007156;GO:0007156;GO:0016020;GO:0016020;GO:0016020;GO:0016021;	K16499	-	S	KOG3594;39CVK;3BARZ;3CU8A;48629;48YT4;4GSD6	protocadherin 10 [Source:NCBI gene;Acc:408048]	408048	Q90ZT4	GO:0007155//cell adhesion;GO:0007155//cell adhesion;GO:0007155//cell adhesion;GO:0007155//cell adhesion;GO:0007155//cell adhesion;GO:0007156//homophilic cell adhesion via plasma membrane adhesion molecules;GO:0007156//homophilic cell adhesion via plasma membrane adhesion molecules;GO:0007156//homophilic cell adhesion via plasma membrane adhesion molecules;	GO:0005886//plasma membrane;GO:0005886//plasma membrane;GO:0005887//integral component of plasma membrane;GO:0016020//membrane;GO:0016020//membrane;GO:0016020//membrane;GO:0016021//integral component of membrane;	GO:0005509//calcium ion binding;GO:0005509//calcium ion binding;GO:0005509//calcium ion binding;	-
ENSGALG00000041225	185.341	212.534	158.148	0.744109	-0.426414	0.00639446	0.540234	Nodiff	1	190561287	190630341	-	507	-	GO:0005515;GO:0005737;GO:0007268;GO:0016323;GO:0030054;GO:0031594;GO:0043005;GO:0043113;GO:0045197;GO:0097120;GO:0098609;GO:0098839;GO:0005515;GO:0005737;	-	-	-	-	-	-	-	GO:0007268//chemical synaptic transmission;GO:0043113//receptor clustering;GO:0045197//establishment or maintenance of epithelial cell apical/basal polarity;GO:0097120//receptor localization to synapse;GO:0098609//cell-cell adhesion;	GO:0005737//cytoplasm;GO:0016323//basolateral plasma membrane;GO:0030054//cell junction;GO:0031594//neuromuscular junction;GO:0043005//neuron projection;GO:0098839//postsynaptic density membrane;GO:0005737//cytoplasm;	GO:0005515//protein binding;GO:0005515//protein binding;	-
ENSGALG00000001450	1300.07	1421.95	1178.19	0.828572	-0.271301	0.00651281	0.540234	Nodiff	24	2458724	2497695	-	5410	IGSF9B	GO:0005515;GO:0005515;GO:0005515;	-	-	T;S	KOG2408;KOG3510;38DKF;3BA5Q;3CVF3;48258;4927W;4GNNT	immunoglobulin superfamily member 9B [Source:NCBI gene;Acc:428237]	-	-	-	-	GO:0005515//protein binding;GO:0005515//protein binding;GO:0005515//protein binding;	-
ENSGALG00000032518	2202.95	2481.92	1923.98	0.775195	-0.367369	0.0065338	0.540234	Nodiff	2	128779644	128829568	-	2019	NCALD	GO:0003073;GO:0003779;GO:0005509;GO:0005509;GO:0015631;GO:0019722;GO:0030276;GO:0046872;	K19695	-	-	-	neurocalcin delta [Source:NCBI gene;Acc:396048]	396048	P62758	GO:0003073//regulation of systemic arterial blood pressure;GO:0019722//calcium-mediated signaling;	-	GO:0003779//actin binding;GO:0005509//calcium ion binding;GO:0005509//calcium ion binding;GO:0015631//tubulin binding;GO:0030276//clathrin binding;GO:0046872//metal ion binding;	ko04740(Olfactory transduction)
ENSGALG00000008681	836.151	912.721	759.582	0.832218	-0.264967	0.00656784	0.540234	Nodiff	17	2092280	2126139	+	1553	NSMF	GO:0005515;GO:0048168;GO:2001222;GO:0005515;GO:0005634;GO:0005634;GO:0005654;GO:0005737;GO:0005737;GO:0048168;GO:0071371;GO:2001222;GO:2001224;GO:0048168;GO:2001222;GO:0005515;GO:0048168;GO:2001222;	K23844	-	S	2QRME;38FYS;3BDFX;3CRE3;481H6;48XFS;4GJR6	NMDA receptor synaptonuclear signaling and neuronal migration factor [Source:NCBI gene;Acc:417260]	417260	-	GO:0048168//regulation of neuronal synaptic plasticity;GO:2001222//regulation of neuron migration;GO:0048168//regulation of neuronal synaptic plasticity;GO:0071371//cellular response to gonadotropin stimulus;GO:2001222//regulation of neuron migration;GO:2001224//positive regulation of neuron migration;GO:0048168//regulation of neuronal synaptic plasticity;GO:2001222//regulation of neuron migratio…	GO:0005634//nucleus;GO:0005634//nucleus;GO:0005654//nucleoplasm;GO:0005737//cytoplasm;GO:0005737//cytoplasm;	GO:0005515//protein binding;GO:0005515//protein binding;GO:0005515//protein binding;	-
ENSGALG00000042577	89.6102	107.704	71.5168	0.664015	-0.590713	0.00658168	0.540234	Nodiff	1	84357507	84390333	+	4636	CFAP44	GO:0000226;GO:0005515;GO:0007288;GO:0007288;GO:0008233;GO:0030317;GO:0005515;	-	-	-	-	cilia and flagella associated protein 44 [Source:NCBI gene;Acc:418359]	-	-	GO:0000226//microtubule cytoskeleton organization;GO:0007288//sperm axoneme assembly;GO:0007288//sperm axoneme assembly;GO:0030317//flagellated sperm motility;	-	GO:0005515//protein binding;GO:0008233//peptidase activity;GO:0005515//protein binding;	-
ENSGALG00000013207	572.954	513.959	631.949	1.22957	0.298156	0.00658793	0.540234	Nodiff	2	88491627	88549212	+	2617	CTNNAL1	GO:0007155;GO:0007266;GO:0045296;GO:0051015;GO:0005829;GO:0007155;GO:0007266;GO:0007266;GO:0045296;GO:0051015;GO:0007155;GO:0007266;GO:0045296;GO:0051015;	-	-	S;W	KOG3681;38BF6;3BHNF;3CSX0;485Q0;490NE;4GRIC	catenin alpha like 1 [Source:NCBI gene;Acc:100858912]	100858912	F1NMC0	GO:0007155//cell adhesion;GO:0007266//Rho protein signal transduction;GO:0007155//cell adhesion;GO:0007266//Rho protein signal transduction;GO:0007266//Rho protein signal transduction;GO:0007155//cell adhesion;GO:0007266//Rho protein signal transduction;	GO:0005829//cytosol;	GO:0045296//cadherin binding;GO:0051015//actin filament binding;GO:0045296//cadherin binding;GO:0051015//actin filament binding;GO:0045296//cadherin binding;GO:0051015//actin filament binding;	-
ENSGALG00000052203	108.98	128.681	89.2779	0.69379	-0.52743	0.0066163	0.540234	Nodiff	10	20683904	20688363	-	378	-	GO:0000226;GO:0000226;GO:0000226;GO:0003779;GO:0005829;GO:0005874;GO:0005874;GO:0005874;GO:0005874;GO:0005875;GO:0007409;GO:0008017;GO:0008017;GO:0008017;GO:0016358;GO:0030425;GO:0031114;GO:0043025;GO:0045202;	-	-	-	-	-	-	-	GO:0000226//microtubule cytoskeleton organization;GO:0000226//microtubule cytoskeleton organization;GO:0000226//microtubule cytoskeleton organization;GO:0007409//axonogenesis;GO:0016358//dendrite development;GO:0031114//regulation of microtubule depolymerization;	GO:0005829//cytosol;GO:0005874//microtubule;GO:0005874//microtubule;GO:0005874//microtubule;GO:0005874//microtubule;GO:0005875//microtubule associated complex;GO:0030425//dendrite;GO:0043025//neuronal cell body;GO:0045202//synapse;	GO:0003779//actin binding;GO:0008017//microtubule binding;GO:0008017//microtubule binding;GO:0008017//microtubule binding;	-
ENSGALG00000016902	381.829	338.721	424.937	1.25453	0.327152	0.00669813	0.540234	Nodiff	1	149017824	149419556	-	1892	GPC5	GO:0009966;GO:0046658;GO:0062023;GO:0009966;GO:0046658;GO:0062023;	K08111	-	M;T	KOG3821;38D4C;3B942;3CXKE;484V4;48Z3E;4GSRE	glypican 5 [Source:NCBI gene;Acc:418795]	418795	-	GO:0009966//regulation of signal transduction;GO:0009966//regulation of signal transduction;	GO:0046658//anchored component of plasma membrane;GO:0062023//collagen-containing extracellular matrix;GO:0046658//anchored component of plasma membrane;GO:0062023//collagen-containing extracellular matrix;	-	-
ENSGALG00000003549	634.783	704.98	564.587	0.800855	-0.320387	0.00671005	0.540234	Nodiff	6	10069198	10071589	-	1104	MTG1	GO:0003924;GO:0005525;GO:0005743;GO:0005759;GO:0005761;GO:0044065;GO:0070129;	K19828	-	C;L;K;S;T	KOG2485;38FQX;3BEF4;3CUEY;485AM;48Z0U;4GJVP	mitochondrial ribosome associated GTPase 1 [Source:NCBI gene;Acc:791224]	791224	E1C7T7	GO:0044065//regulation of respiratory system process;GO:0070129//regulation of mitochondrial translation;	GO:0005743//mitochondrial inner membrane;GO:0005759//mitochondrial matrix;GO:0005761//mitochondrial ribosome;	GO:0003924//GTPase activity;GO:0005525//GTP binding;	-
ENSGALG00000036920	864.633	785.927	943.338	1.20029	0.263379	0.00672192	0.540234	Nodiff	13	17545410	17564407	+	1674	SLC22A5	GO:0009609;GO:0015226;GO:0015651;GO:0015697;GO:0015879;GO:0016021;GO:0016324;GO:0022857;GO:0030165;GO:0031526;GO:0055085;GO:0060731;GO:0070715;GO:1901235;GO:1902270;	K08202	-	-	-	solute carrier family 22 member 5 [Source:NCBI gene;Acc:416328]	416328	Q5W4T3	GO:0009609//response to symbiotic bacterium;GO:0015697//quaternary ammonium group transport;GO:0015879//carnitine transport;GO:0055085//transmembrane transport;GO:0060731//positive regulation of intestinal epithelial structure maintenance;GO:0070715//sodium-dependent organic cation transport;GO:1902270//(R)-carnitine transmembrane transport;	GO:0016021//integral component of membrane;GO:0016324//apical plasma membrane;GO:0031526//brush border membrane;	GO:0015226//carnitine transmembrane transporter activity;GO:0015651//quaternary ammonium group transmembrane transporter activity;GO:0022857//transmembrane transporter activity;GO:0030165//PDZ domain binding;GO:1901235//(R)-carnitine transmembrane transporter activity;	ko05231(Choline metabolism in cancer)
ENSGALG00000008193	3518.35	3845.24	3191.46	0.829977	-0.268857	0.00672688	0.540234	Nodiff	1	13185663	13457234	-	10389	RELN	GO:0000904;GO:0001764;GO:0001764;GO:0005615;GO:0005737;GO:0007411;GO:0007417;GO:0007417;GO:0007420;GO:0007612;GO:0007616;GO:0007626;GO:0008306;GO:0010001;GO:0010468;GO:0010976;GO:0014068;GO:0016358;GO:0016477;GO:0018108;GO:0021511;GO:0021517;GO:0021766;GO:0021800;GO:0021819;GO:0021987;GO:0030425;GO:0030900;GO:0031012;GO:0032008;GO:0032793;GO:0035418;GO:0038026;GO:0045860;GO:0048265;GO:0050731;GO:…	K06249	EC:3.4.21.-	O;T	2QSIP;38E3S;3BBJ0;3CSD9;4896I;48YCX;4GN4X	reelin [Source:NCBI gene;Acc:427850]	427850	-	GO:0000904//cell morphogenesis involved in differentiation;GO:0001764//neuron migration;GO:0001764//neuron migration;GO:0007411//axon guidance;GO:0007417//central nervous system development;GO:0007417//central nervous system development;GO:0007420//brain development;GO:0007612//learning;GO:0007616//long-term memory;GO:0007626//locomotory behavior;GO:0008306//associative learning;GO:0010001//glial…	GO:0005615//extracellular space;GO:0005737//cytoplasm;GO:0030425//dendrite;GO:0031012//extracellular matrix;	GO:0070325//lipoprotein particle receptor binding;GO:0070325//lipoprotein particle receptor binding;GO:0070326//very-low-density lipoprotein particle receptor binding;	ko05165(Human papillomavirus infection);ko05017(Spinocerebellar ataxia);ko04512(ECM-receptor interaction);ko04510(Focal adhesion);ko04151(PI3K-Akt signaling pathway)
ENSGALG00000004321	502.077	427.174	576.98	1.35069	0.433695	0.00675599	0.540234	Nodiff	20	5492048	5500197	+	2325	OSER1	-	-	-	S	2QUK0;39CTQ;3BIPQ;3CX15;4825V;48XB6;4GIUV	oxidative stress responsive serine rich 1 [Source:NCBI gene;Acc:419203]	419203	-	-	-	-	-
ENSGALG00000025896	1354.01	1471.31	1236.72	0.840555	-0.250586	0.00676744	0.540234	Nodiff	8	12637014	12664559	-	2160	PLPPR4	GO:0005887;GO:0006644;GO:0007186;GO:0007409;GO:0042577;GO:0046839;GO:0048839;GO:0050804;GO:0051966;GO:0098839;GO:0098839;GO:0098978;GO:0099061;GO:0140354;GO:0005887;GO:0006644;GO:0007409;GO:0042577;GO:0046839;	K19582	-	I	KOG3030;39AT6;3BKHB;3D30S;484N3;48Y3N;4GU7R	phospholipid phosphatase related 4 [Source:NCBI gene;Acc:424476]	424476	-	GO:0006644//phospholipid metabolic process;GO:0007186//G protein-coupled receptor signaling pathway;GO:0007409//axonogenesis;GO:0046839//phospholipid dephosphorylation;GO:0048839//inner ear development;GO:0050804//modulation of chemical synaptic transmission;GO:0051966//regulation of synaptic transmission, glutamatergic;GO:0140354//lipid import into cell;GO:0006644//phospholipid metabolic process…	GO:0005887//integral component of plasma membrane;GO:0098839//postsynaptic density membrane;GO:0098839//postsynaptic density membrane;GO:0098978//glutamatergic synapse;GO:0099061//integral component of postsynaptic density membrane;GO:0005887//integral component of plasma membrane;	GO:0042577//lipid phosphatase activity;GO:0042577//lipid phosphatase activity;	-
ENSGALG00000009612	754.66	667.578	841.741	1.26089	0.33444	0.00679407	0.540234	Nodiff	3	19449227	19512091	-	4572	TGFB2	GO:0000902;GO:0001540;GO:0001654;GO:0001666;GO:0001837;GO:0003007;GO:0005102;GO:0005114;GO:0005160;GO:0005160;GO:0005576;GO:0005615;GO:0005615;GO:0006468;GO:0007179;GO:0007435;GO:0007507;GO:0008083;GO:0008219;GO:0008284;GO:0008285;GO:0008347;GO:0009410;GO:0009611;GO:0010002;GO:0010629;GO:0010634;GO:0010693;GO:0010718;GO:0010936;GO:0014068;GO:0016477;GO:0016525;GO:0030199;GO:0030307;GO:0030308;GO:…	K13376	-	T;M	KOG3900;38BXM;3BDHF;3CUHZ;487TT;48VUH;4GRZ4	transforming growth factor beta 2 [Source:NCBI gene;Acc:421352]	421352	F1NNP2	GO:0000902//cell morphogenesis;GO:0001654//eye development;GO:0001666//response to hypoxia;GO:0001837//epithelial to mesenchymal transition;GO:0003007//heart morphogenesis;GO:0006468//protein phosphorylation;GO:0007179//transforming growth factor beta receptor signaling pathway;GO:0007435//salivary gland morphogenesis;GO:0007507//heart development;GO:0008219//cell death;GO:0008284//positive regul…	GO:0005576//extracellular region;GO:0005615//extracellular space;GO:0005615//extracellular space;GO:0062023//collagen-containing extracellular matrix;	GO:0001540//amyloid-beta binding;GO:0005102//signaling receptor binding;GO:0005114//type II transforming growth factor beta receptor binding;GO:0005160//transforming growth factor beta receptor binding;GO:0005160//transforming growth factor beta receptor binding;GO:0008083//growth factor activity;GO:0034714//type III transforming growth factor beta receptor binding;GO:0042803//protein homodimeriz…	ko05415(Diabetic cardiomyopathy);ko05414(Dilated cardiomyopathy);ko05410(Hypertrophic cardiomyopathy);ko05323(Rheumatoid arthritis);ko05321(Inflammatory bowel disease);ko05226(Gastric cancer);ko05225(Hepatocellular carcinoma);ko05220(Chronic myeloid leukemia);ko05212(Pancreatic cancer);ko05211(Renal cell carcinoma);ko05210(Colorectal cancer);ko05206(MicroRNAs in cancer);ko05205(Proteoglycans in c…
ENSGALG00000000516	199.257	226.68	171.834	0.758046	-0.399642	0.00682472	0.540234	Nodiff	11	18778749	18811706	-	5015	FANCA	GO:0005634;GO:0005654;GO:0007140;GO:0008584;GO:0008585;GO:0036297;GO:0042127;GO:0043240;GO:0043240;GO:0045589;GO:0050727;GO:0051090;GO:2000348;	K10888	-	S	2QT8N;39HFH;3BCSD;3D02X;483I8;4936T;4GQU7	Fanconi anemia complementation group A [Source:NCBI gene;Acc:415854]	415854	B3Y9I3	GO:0007140//male meiotic nuclear division;GO:0008584//male gonad development;GO:0008585//female gonad development;GO:0036297//interstrand cross-link repair;GO:0042127//regulation of cell population proliferation;GO:0045589//regulation of regulatory T cell differentiation;GO:0050727//regulation of inflammatory response;GO:0051090//regulation of DNA-binding transcription factor activity;GO:2000348/…	GO:0005634//nucleus;GO:0005654//nucleoplasm;GO:0043240//Fanconi anaemia nuclear complex;GO:0043240//Fanconi anaemia nuclear complex;	-	ko03460(Fanconi anemia pathway)
ENSGALG00000040807	1281.5	1403.19	1159.81	0.826551	-0.274825	0.00702678	0.547563	Nodiff	22	1641150	1647926	-	2854	DMTN	-	-	-	-	-	dematin actin binding protein [Source:NCBI gene;Acc:776542]	776542	-	-	-	-	-
ENSGALG00000053112	11.9893	17.8531	6.12544	0.343102	-1.54329	0.0070273	0.547563	Down Regulation	6	19012322	19019069	-	1844	-	GO:0005515;GO:0070830;GO:0070830;	-	-	-	-	-	-	-	GO:0070830//bicellular tight junction assembly;GO:0070830//bicellular tight junction assembly;	-	GO:0005515//protein binding;	-
ENSGALG00000004261	76.6479	56.7878	96.5079	1.69945	0.765066	0.00703	0.547563	Nodiff	10	7520347	7547386	-	4534	AQP9	GO:0015267;GO:0015267;GO:0016020;GO:0016020;GO:0016020;GO:0016021;GO:0055085;GO:0055085;GO:0005345;GO:0005350;GO:0005887;GO:0006833;GO:0006863;GO:0010033;GO:0015250;GO:0015254;GO:0015265;GO:0015267;GO:0015791;GO:0015793;GO:0015837;GO:0015855;GO:0016020;GO:0043231;GO:0046689;GO:0055085;GO:0071320;GO:0071918;	K09877	-	-	-	aquaporin 9 [Source:NCBI gene;Acc:415402]	415402	A0A1D5PEK7	GO:0055085//transmembrane transport;GO:0055085//transmembrane transport;GO:0006833//water transport;GO:0006863//purine nucleobase transport;GO:0010033//response to organic substance;GO:0015791//polyol transport;GO:0015793//glycerol transport;GO:0015837//amine transport;GO:0015855//pyrimidine nucleobase transport;GO:0046689//response to mercury ion;GO:0055085//transmembrane transport;GO:0071320//c…	GO:0016020//membrane;GO:0016020//membrane;GO:0016020//membrane;GO:0016021//integral component of membrane;GO:0005887//integral component of plasma membrane;GO:0016020//membrane;GO:0043231//intracellular membrane-bounded organelle;	GO:0015267//channel activity;GO:0015267//channel activity;GO:0005345//purine nucleobase transmembrane transporter activity;GO:0005350//pyrimidine nucleobase transmembrane transporter activity;GO:0015250//water channel activity;GO:0015254//glycerol channel activity;GO:0015265//urea channel activity;GO:0015267//channel activity;	ko04976(Bile secretion);ko04613(Neutrophil extracellular trap formation)
ENSGALG00000008544	1543	1671.04	1414.96	0.846753	-0.239987	0.0071577	0.547563	Nodiff	3	16420525	16490003	+	2924	SLC8A1	GO:0005432;GO:0005432;GO:0005516;GO:0005654;GO:0005886;GO:0005887;GO:0006816;GO:0006883;GO:0007154;GO:0008092;GO:0016020;GO:0016021;GO:0030501;GO:0030506;GO:0035725;GO:0035994;GO:0045202;GO:0055085;GO:0070509;GO:0070588;GO:0071944;GO:0098719;GO:0098735;	K05849	-	T;P	KOG1306;38CSX;3BAVY;3CSR1;482DN;48XY6;4GTQQ	solute carrier family 8 member A1 [Source:NCBI gene;Acc:395760]	395760	Q000J5	GO:0006816//calcium ion transport;GO:0006883//cellular sodium ion homeostasis;GO:0007154//cell communication;GO:0030501//positive regulation of bone mineralization;GO:0035725//sodium ion transmembrane transport;GO:0035994//response to muscle stretch;GO:0055085//transmembrane transport;GO:0070509//calcium ion import;GO:0070588//calcium ion transmembrane transport;GO:0098719//sodium ion import acro…	GO:0005654//nucleoplasm;GO:0005886//plasma membrane;GO:0005887//integral component of plasma membrane;GO:0016020//membrane;GO:0016021//integral component of membrane;GO:0045202//synapse;GO:0071944//cell periphery;	GO:0005432//calcium:sodium antiporter activity;GO:0005432//calcium:sodium antiporter activity;GO:0005516//calmodulin binding;GO:0008092//cytoskeletal protein binding;GO:0030506//ankyrin binding;	ko05414(Dilated cardiomyopathy);ko05412(Arrhythmogenic right ventricular cardiomyopathy);ko05410(Hypertrophic cardiomyopathy);ko04978(Mineral absorption);ko04974(Protein digestion and absorption);ko04961(Endocrine and other factor-regulated calcium reabsorption);ko04740(Olfactory transduction);ko04371(Apelin signaling pathway);ko04261(Adrenergic signaling in cardiomyocytes);ko04260(Cardiac muscle…
ENSGALG00000035594	27.5973	14.0056	41.189	2.94089	1.55625	0.00717468	0.547563	Up Regulation	19	56925	70995	-	5825	MYH7	GO:0003774;GO:0005515;GO:0005524;GO:0016459;GO:0051015;	K17751	-	-	-	myosin, heavy chain 7, cardiac muscle, beta [Source:NCBI gene;Acc:395350]	395350	Q910C5	-	GO:0016459//myosin complex;	GO:0003774//cytoskeletal motor activity;GO:0005515//protein binding;GO:0005524//ATP binding;GO:0051015//actin filament binding;	ko05416(Viral myocarditis);ko05414(Dilated cardiomyopathy);ko05410(Hypertrophic cardiomyopathy);ko04919(Thyroid hormone signaling pathway);ko04261(Adrenergic signaling in cardiomyocytes);ko04260(Cardiac muscle contraction);ko04022(cGMP-PKG signaling pathway)
ENSGALG00000014210	453.195	404.134	502.257	1.2428	0.313595	0.00723112	0.547563	Nodiff	4	67593017	67600493	+	1970	GNPDA2	GO:0004342;GO:0005975;GO:0006044;GO:0004342;GO:0004342;GO:0004342;GO:0004342;GO:0005975;GO:0005975;GO:0006044;GO:0006044;	K02564	EC:3.5.99.6	-	-	glucosamine-6-phosphate deaminase 2 [Source:NCBI gene;Acc:422772]	422772	E1C878	GO:0005975//carbohydrate metabolic process;GO:0006044//N-acetylglucosamine metabolic process;GO:0005975//carbohydrate metabolic process;GO:0005975//carbohydrate metabolic process;GO:0006044//N-acetylglucosamine metabolic process;GO:0006044//N-acetylglucosamine metabolic process;	-	GO:0004342//glucosamine-6-phosphate deaminase activity;GO:0004342//glucosamine-6-phosphate deaminase activity;GO:0004342//glucosamine-6-phosphate deaminase activity;GO:0004342//glucosamine-6-phosphate deaminase activity;GO:0004342//glucosamine-6-phosphate deaminase activity;	ko00520(Amino sugar and nucleotide sugar metabolism)
ENSGALG00000011409	137.285	159.536	115.034	0.721057	-0.471814	0.00726925	0.547563	Nodiff	1	45696332	45697655	+	412	SNRPF	GO:0000387;GO:0000387;GO:0000398;GO:0000398;GO:0003723;GO:0005634;GO:0005681;GO:0005681;GO:0005683;GO:0005685;GO:0005687;GO:0005689;GO:0005829;GO:0008380;GO:0030532;GO:0034709;GO:0034715;GO:0034719;GO:0046540;GO:0071005;GO:0071007;GO:0071013;	K11098	-	-	-	small nuclear ribonucleoprotein polypeptide F [Source:NCBI gene;Acc:417916]	417916	A0A1L1RSB5	GO:0000387//spliceosomal snRNP assembly;GO:0000387//spliceosomal snRNP assembly;GO:0000398//mRNA splicing, via spliceosome;GO:0000398//mRNA splicing, via spliceosome;GO:0008380//RNA splicing;	GO:0005634//nucleus;GO:0005681//spliceosomal complex;GO:0005681//spliceosomal complex;GO:0005683//U7 snRNP;GO:0005685//U1 snRNP;GO:0005687//U4 snRNP;GO:0005689//U12-type spliceosomal complex;GO:0005829//cytosol;GO:0030532//small nuclear ribonucleoprotein complex;GO:0034709//methylosome;GO:0034715//pICln-Sm protein complex;GO:0034719//SMN-Sm protein complex;GO:0046540//U4/U6 x U5 tri-snRNP complex…	GO:0003723//RNA binding;	ko03040(Spliceosome)
ENSGALG00000008113	1988.79	1794.51	2183.07	1.21653	0.282768	0.00731218	0.547563	Nodiff	7	10323371	10366305	-	3117	PLCL1	GO:0004435;GO:0004435;GO:0004435;GO:0004435;GO:0006629;GO:0006629;GO:0006629;GO:0007165;GO:0007165;GO:0007165;GO:0008081;GO:0008081;GO:0016042;GO:0016787;GO:0032228;GO:0032228;GO:0035556;GO:0035556;GO:0048015;GO:0050811;GO:0050811;GO:0070679;GO:0070679;	K15375	-	S;I	KOG0169;38BAR;3BDCE;3CX90;480R3;491TR;4GJE8	phospholipase C like 1 (inactive) [Source:HGNC Symbol;Acc:HGNC:9063]	424060	-	GO:0006629//lipid metabolic process;GO:0006629//lipid metabolic process;GO:0006629//lipid metabolic process;GO:0007165//signal transduction;GO:0007165//signal transduction;GO:0007165//signal transduction;GO:0016042//lipid catabolic process;GO:0032228//regulation of synaptic transmission, GABAergic;GO:0032228//regulation of synaptic transmission, GABAergic;GO:0035556//intracellular signal transduc…	-	GO:0004435//phosphatidylinositol phospholipase C activity;GO:0004435//phosphatidylinositol phospholipase C activity;GO:0004435//phosphatidylinositol phospholipase C activity;GO:0004435//phosphatidylinositol phospholipase C activity;GO:0008081//phosphoric diester hydrolase activity;GO:0008081//phosphoric diester hydrolase activity;GO:0016787//hydrolase activity;GO:0050811//GABA receptor binding;GO…	ko04727(GABAergic synapse)
ENSGALG00000004364	1813.88	1959.34	1668.43	0.851529	-0.231872	0.00733658	0.547563	Nodiff	19	6464720	6487543	+	2622	ABR	GO:0005085;GO:0005085;GO:0005096;GO:0005096;GO:0007165;GO:0035556;GO:0043547;GO:0090630;	K20629	-	-	-	ABR, RhoGEF and GTPase activating protein [Source:NCBI gene;Acc:771897]	771897	-	GO:0007165//signal transduction;GO:0035556//intracellular signal transduction;GO:0043547//positive regulation of GTPase activity;GO:0090630//activation of GTPase activity;	-	GO:0005085//guanyl-nucleotide exchange factor activity;GO:0005085//guanyl-nucleotide exchange factor activity;GO:0005096//GTPase activator activity;GO:0005096//GTPase activator activity;	-
ENSGALG00000034769	1956.92	1803.59	2110.26	1.17004	0.226555	0.00736439	0.547563	Nodiff	4	12248585	12276877	+	5390	USP12-like	GO:0004843;GO:0006511;GO:0016579;GO:0004843;GO:0006511;GO:0016579;GO:0004843;GO:0006511;GO:0016579;	K11842	EC:3.4.19.12	-	-	ubiquitin specific peptidase 12-like [Source:NCBI gene;Acc:422322]	422322	A0A1D5PXG6	GO:0006511//ubiquitin-dependent protein catabolic process;GO:0016579//protein deubiquitination;GO:0006511//ubiquitin-dependent protein catabolic process;GO:0016579//protein deubiquitination;GO:0006511//ubiquitin-dependent protein catabolic process;GO:0016579//protein deubiquitination;	-	GO:0004843//thiol-dependent deubiquitinase;GO:0004843//thiol-dependent deubiquitinase;GO:0004843//thiol-dependent deubiquitinase;	-
ENSGALG00000050686	8.38653	13.2598	3.51324	0.264953	-1.91619	0.00737221	0.547563	Down Regulation	13	2464338	2466341	+	2004	-	GO:0005509;GO:0005886;GO:0007155;GO:0007156;GO:0016020;	-	-	-	-	protocadherin gamma subfamily A, 2 [Source:NCBI gene;Acc:431363]	-	-	GO:0007155//cell adhesion;GO:0007156//homophilic cell adhesion via plasma membrane adhesion molecules;	GO:0005886//plasma membrane;GO:0016020//membrane;	GO:0005509//calcium ion binding;	-
ENSGALG00000021620	1012.01	1099.03	924.989	0.841638	-0.248728	0.00738462	0.547563	Nodiff	28	3971267	3976292	-	2287	TMEM59L	-	-	-	S	2S08T;39XMT;3BP2A;3CV1T;483RN;4911R;4GJ4F	transmembrane protein 59 like [Source:NCBI gene;Acc:420122]	420122	F1P0P7	-	-	-	-
ENSGALG00000013094	2266.88	2470.81	2062.96	0.834933	-0.260267	0.00742194	0.547563	Nodiff	2	80755118	80807342	-	2816	DDC	GO:0003824;GO:0004058;GO:0004058;GO:0005737;GO:0006520;GO:0009636;GO:0016830;GO:0016831;GO:0019752;GO:0019899;GO:0030170;GO:0036468;	K01593	-	E	KOG0628;38EZZ;3B9Z3;3CSPZ;481AM;48Y66;4GKS4	dopa decarboxylase [Source:NCBI gene;Acc:420947]	420947	E1BV90	GO:0006520//cellular amino acid metabolic process;GO:0009636//response to toxic substance;GO:0019752//carboxylic acid metabolic process;	GO:0005737//cytoplasm;	GO:0003824//catalytic activity;GO:0004058//aromatic-L-amino-acid decarboxylase activity;GO:0004058//aromatic-L-amino-acid decarboxylase activity;GO:0016830//carbon-carbon lyase activity;GO:0016831//carboxy-lyase activity;GO:0019899//enzyme binding;GO:0030170//pyridoxal phosphate binding;GO:0036468//L-dopa decarboxylase activity;	ko05034(Alcoholism);ko05031(Amphetamine addiction);ko05030(Cocaine addiction);ko04728(Dopaminergic synapse);ko04726(Serotonergic synapse);ko04361(Axon regeneration);ko00965(Betalain biosynthesis);ko00950(Isoquinoline alkaloid biosynthesis);ko00901(Indole alkaloid biosynthesis);ko00380(Tryptophan metabolism);ko00360(Phenylalanine metabolism);ko00350(Tyrosine metabolism)
ENSGALG00000039108	2564.31	2757.74	2370.88	0.859717	-0.218067	0.00743053	0.547563	Nodiff	28	3402522	3411879	+	5979	MAP1S	GO:0000226;GO:0001578;GO:0003677;GO:0005634;GO:0005654;GO:0005730;GO:0005819;GO:0005829;GO:0005874;GO:0005874;GO:0006915;GO:0008017;GO:0008017;GO:0010848;GO:0015631;GO:0030054;GO:0042995;GO:0045202;GO:0048471;GO:0048487;GO:0048812;GO:0051015;GO:0051015;	-	-	-	-	microtubule associated protein 1S [Source:NCBI gene;Acc:429847]	-	-	GO:0000226//microtubule cytoskeleton organization;GO:0001578//microtubule bundle formation;GO:0006915//apoptotic process;GO:0010848//regulation of chromatin disassembly;GO:0048812//neuron projection morphogenesis;	GO:0005634//nucleus;GO:0005654//nucleoplasm;GO:0005730//nucleolus;GO:0005819//spindle;GO:0005829//cytosol;GO:0005874//microtubule;GO:0005874//microtubule;GO:0030054//cell junction;GO:0042995//cell projection;GO:0045202//synapse;GO:0048471//perinuclear region of cytoplasm;	GO:0003677//DNA binding;GO:0008017//microtubule binding;GO:0008017//microtubule binding;GO:0015631//tubulin binding;GO:0048487//beta-tubulin binding;GO:0051015//actin filament binding;GO:0051015//actin filament binding;	-
ENSGALG00000032702	801.184	886.37	715.999	0.807788	-0.307952	0.00743097	0.547563	Nodiff	27	5594292	5609665	-	4659	ITGA3	GO:0001764;GO:0002020;GO:0005886;GO:0005886;GO:0007155;GO:0007613;GO:0008305;GO:0009897;GO:0009986;GO:0016323;GO:0017015;GO:0030111;GO:0030324;GO:0030510;GO:0031527;GO:0034667;GO:0035024;GO:0035640;GO:0043235;GO:0043588;GO:0045202;GO:0046982;GO:0048333;GO:0060076;GO:0071944;GO:0072006;GO:0097060;GO:0097062;GO:0097205;GO:1903078;GO:0007155;GO:0008305;GO:0007155;GO:0008305;	K06482	-	-	-	integrin subunit alpha 3 [Source:NCBI gene;Acc:373946]	373946	Q98TT7	GO:0001764//neuron migration;GO:0007155//cell adhesion;GO:0007613//memory;GO:0017015//regulation of transforming growth factor beta receptor signaling pathway;GO:0030111//regulation of Wnt signaling pathway;GO:0030324//lung development;GO:0030510//regulation of BMP signaling pathway;GO:0035024//negative regulation of Rho protein signal transduction;GO:0035640//exploration behavior;GO:0043588//ski…	GO:0005886//plasma membrane;GO:0005886//plasma membrane;GO:0008305//integrin complex;GO:0009897//external side of plasma membrane;GO:0009986//cell surface;GO:0016323//basolateral plasma membrane;GO:0031527//filopodium membrane;GO:0034667//integrin alpha3-beta1 complex;GO:0043235//receptor complex;GO:0045202//synapse;GO:0060076//excitatory synapse;GO:0071944//cell periphery;GO:0097060//synaptic me…	GO:0002020//protease binding;GO:0046982//protein heterodimerization activity;	ko05414(Dilated cardiomyopathy);ko05412(Arrhythmogenic right ventricular cardiomyopathy);ko05410(Hypertrophic cardiomyopathy);ko05222(Small cell lung cancer);ko05200(Pathways in cancer);ko05165(Human papillomavirus infection);ko04810(Regulation of actin cytoskeleton);ko04640(Hematopoietic cell lineage);ko04512(ECM-receptor interaction);ko04510(Focal adhesion);ko04151(PI3K-Akt signaling pathway)
ENSGALG00000016567	264.137	223.104	305.169	1.36783	0.451889	0.00751493	0.55121	Nodiff	3	105043160	105052107	+	1944	EPHX2	GO:0000287;GO:0003824;GO:0004301;GO:0004301;GO:0005777;GO:0005829;GO:0010628;GO:0010628;GO:0015643;GO:0016311;GO:0016791;GO:0042577;GO:0042632;GO:0042632;GO:0042803;GO:0046272;GO:0046839;GO:0052642;GO:0090181;GO:0090181;GO:0097176;GO:0097176;	K08726	-	I;P;L	KOG3085;KOG4178;39WAD;3BACN;3CVBC;482KF;48X7C;4GKMZ	epoxide hydrolase 2 [Source:NCBI gene;Acc:421999]	421999	Q45QT1	GO:0010628//positive regulation of gene expression;GO:0010628//positive regulation of gene expression;GO:0016311//dephosphorylation;GO:0042632//cholesterol homeostasis;GO:0042632//cholesterol homeostasis;GO:0046272//stilbene catabolic process;GO:0046839//phospholipid dephosphorylation;GO:0090181//regulation of cholesterol metabolic process;GO:0090181//regulation of cholesterol metabolic process;G…	GO:0005777//peroxisome;GO:0005829//cytosol;	GO:0000287//magnesium ion binding;GO:0003824//catalytic activity;GO:0004301//epoxide hydrolase activity;GO:0004301//epoxide hydrolase activity;GO:0015643//toxic substance binding;GO:0016791//phosphatase activity;GO:0042577//lipid phosphatase activity;GO:0042803//protein homodimerization activity;GO:0052642//lysophosphatidic acid phosphatase activity;	ko05208(Chemical carcinogenesis - reactive oxygen species);ko05207(Chemical carcinogenesis - receptor activation);ko04146(Peroxisome);ko00625(Chloroalkane and chloroalkene degradation);ko00590(Arachidonic acid metabolism)
ENSGALG00000000394	6833.76	7367.84	6299.68	0.855023	-0.225964	0.00762408	0.554704	Nodiff	26	1352712	1360431	+	3287	SLC6A17	GO:0005887;GO:0007420;GO:0016021;	K05048	-	Z;T;D	KOG3659;38ERG;3B954;3CSZT;481BC;4913B;4GJYS	solute carrier family 6 member 17 [Source:NCBI gene;Acc:419805]	419805	F1NS02	GO:0007420//brain development;	GO:0005887//integral component of plasma membrane;GO:0016021//integral component of membrane;	-	-
ENSGALG00000011596	782.514	710.427	854.602	1.20294	0.266566	0.00763195	0.554704	Nodiff	7	25353898	25421281	+	2967	PTPN4	GO:0004725;GO:0004726;GO:0005515;GO:0005737;GO:0005856;GO:0006470;GO:0008092;GO:0009898;GO:0016020;GO:0016311;GO:0016791;GO:0018108;GO:0035254;GO:0004725;GO:0005515;GO:0005856;GO:0006470;GO:0008092;GO:0016311;GO:0016791;	-	-	T	KOG0792;38DFT;3BFXV;3CRZX;4811B;4942P;4GMSU	protein tyrosine phosphatase, non-receptor type 4 [Source:NCBI gene;Acc:424234]	-	-	GO:0006470//protein dephosphorylation;GO:0016311//dephosphorylation;GO:0018108//peptidyl-tyrosine phosphorylation;GO:0006470//protein dephosphorylation;GO:0016311//dephosphorylation;	GO:0005737//cytoplasm;GO:0005856//cytoskeleton;GO:0009898//cytoplasmic side of plasma membrane;GO:0016020//membrane;GO:0005856//cytoskeleton;	GO:0004725//protein tyrosine phosphatase activity;GO:0004726//non-membrane spanning protein tyrosine phosphatase activity;GO:0005515//protein binding;GO:0008092//cytoskeletal protein binding;GO:0016791//phosphatase activity;GO:0035254//glutamate receptor binding;GO:0004725//protein tyrosine phosphatase activity;GO:0005515//protein binding;GO:0008092//cytoskeletal protein binding;GO:0016791//phosp…	-
ENSGALG00000010009	30.307	39.8626	20.7515	0.520575	-0.941822	0.0077455	0.556206	Nodiff	4	31586087	31704957	-	1430	TTC29	GO:0003341;GO:0005515;GO:0036126;GO:0044782;	K24937	-	S	2QQ2U;38FDV;3BHGZ;3D00V;47ZGU;48VWE;4GPT2	tetratricopeptide repeat domain 29 [Source:NCBI gene;Acc:422468]	422468	-	GO:0003341//cilium movement;GO:0044782//cilium organization;	GO:0036126//sperm flagellum;	GO:0005515//protein binding;	-
ENSGALG00000044643	111.722	131.193	92.251	0.70317	-0.508054	0.0077671	0.556206	Nodiff	13	11072047	11073207	+	1161	-	-	-	-	-	-	G protein regulated inducer of neurite outgrowth 1 [Source:NCBI gene;Acc:101748622]	-	-	-	-	-	-
ENSGALG00000041524	337.994	375.917	300.072	0.79824	-0.325106	0.00777792	0.556206	Nodiff	2	333108	334327	-	882	-	GO:0005272;GO:0005272;GO:0005272;GO:0006811;GO:0006814;GO:0006814;GO:0006814;GO:0016020;GO:0016020;GO:0016020;GO:0016021;GO:0035725;	-	-	-	-	-	-	-	GO:0006811//ion transport;GO:0006814//sodium ion transport;GO:0006814//sodium ion transport;GO:0006814//sodium ion transport;GO:0035725//sodium ion transmembrane transport;	GO:0016020//membrane;GO:0016020//membrane;GO:0016020//membrane;GO:0016021//integral component of membrane;	GO:0005272//sodium channel activity;GO:0005272//sodium channel activity;GO:0005272//sodium channel activity;	-
ENSGALG00000032219	1974.63	2129.39	1819.88	0.85465	-0.226594	0.00783167	0.556206	Nodiff	KZ626839.1	490691	511711	-	1822	FUS	GO:0003676;GO:0003723;GO:0006355;GO:0003676;GO:0003676;GO:0003682;GO:0003712;GO:0003713;GO:0003723;GO:0003723;GO:0003723;GO:0003723;GO:0003723;GO:0005634;GO:0005634;GO:0005634;GO:0005654;GO:0006355;GO:0006355;GO:0006355;GO:0006357;GO:0008380;GO:0042802;GO:0043484;GO:0045893;GO:0048255;GO:0051260;GO:1905168;GO:0003676;GO:0003723;GO:0006355;	K13098	-	-	-	FUS RNA binding protein [Source:NCBI gene;Acc:414144]	414144	Q6J4Y8	GO:0006355//regulation of transcription, DNA-templated;GO:0006355//regulation of transcription, DNA-templated;GO:0006355//regulation of transcription, DNA-templated;GO:0006355//regulation of transcription, DNA-templated;GO:0006357//regulation of transcription by RNA polymerase II;GO:0008380//RNA splicing;GO:0043484//regulation of RNA splicing;GO:0045893//positive regulation of transcription, DNA-…	GO:0005634//nucleus;GO:0005634//nucleus;GO:0005634//nucleus;GO:0005654//nucleoplasm;	GO:0003676//nucleic acid binding;GO:0003723//RNA binding;GO:0003676//nucleic acid binding;GO:0003676//nucleic acid binding;GO:0003682//chromatin binding;GO:0003712//transcription coregulator activity;GO:0003713//transcription coactivator activity;GO:0003723//RNA binding;GO:0003723//RNA binding;GO:0003723//RNA binding;GO:0003723//RNA binding;GO:0003723//RNA binding;GO:0042802//identical protein bi…	ko05202(Transcriptional misregulation in cancer);ko05022(Pathways of neurodegeneration - multiple diseases);ko05014(Amyotrophic lateral sclerosis);ko03040(Spliceosome);ko03015(mRNA surveillance pathway)
ENSGALG00000033039	874.383	954.694	794.072	0.831756	-0.265767	0.00783584	0.556206	Nodiff	17	5255485	5264795	+	2958	ENG	-	K06526	-	-	-	endoglin [Source:NCBI gene;Acc:771557]	771557	Q6B0K7	-	-	-	-
ENSGALG00000028685	2742.82	2955.36	2530.28	0.856167	-0.224036	0.00786132	0.556206	Nodiff	2	78655148	78914889	+	5212	SEMA5A	GO:0001755;GO:0005515;GO:0007411;GO:0016020;GO:0016021;GO:0016021;GO:0030154;GO:0030215;GO:0030215;GO:0030215;GO:0030335;GO:0045499;GO:0048675;GO:0048843;GO:0050919;GO:0071526;GO:0110165;GO:0001755;GO:0005515;GO:0007411;GO:0016020;GO:0016021;GO:0016021;GO:0030154;GO:0030215;GO:0030215;GO:0030215;GO:0030335;GO:0045499;GO:0048675;GO:0048843;GO:0050919;GO:0071526;GO:0110165;GO:0005515;GO:0030215;	K06841	-	S;T	KOG3611;38B60;3B9EA;3CTM8;487Q8;494RG	semaphorin 5A [Source:NCBI gene;Acc:420931]	420931	R4GFU3	GO:0001755//neural crest cell migration;GO:0007411//axon guidance;GO:0030154//cell differentiation;GO:0030335//positive regulation of cell migration;GO:0048675//axon extension;GO:0048843//negative regulation of axon extension involved in axon guidance;GO:0050919//negative chemotaxis;GO:0071526//semaphorin-plexin signaling pathway;GO:0001755//neural crest cell migration;GO:0007411//axon guidance;G…	GO:0016020//membrane;GO:0016021//integral component of membrane;GO:0016021//integral component of membrane;GO:0110165//cellular anatomical entity;GO:0016020//membrane;GO:0016021//integral component of membrane;GO:0016021//integral component of membrane;GO:0110165//cellular anatomical entity;	GO:0005515//protein binding;GO:0030215//semaphorin receptor binding;GO:0030215//semaphorin receptor binding;GO:0030215//semaphorin receptor binding;GO:0045499//chemorepellent activity;GO:0005515//protein binding;GO:0030215//semaphorin receptor binding;GO:0030215//semaphorin receptor binding;GO:0030215//semaphorin receptor binding;GO:0045499//chemorepellent activity;GO:0005515//protein binding;GO:…	ko04360(Axon guidance)
ENSGALG00000029648	928.495	1075.3	781.687	0.726945	-0.460081	0.00797197	0.56155	Nodiff	5	13911444	13927845	+	1625	TH	GO:0001666;GO:0001963;GO:0004497;GO:0004511;GO:0004511;GO:0005506;GO:0005634;GO:0005737;GO:0005737;GO:0005790;GO:0006585;GO:0007507;GO:0007601;GO:0007612;GO:0007613;GO:0007617;GO:0007626;GO:0008016;GO:0009072;GO:0009887;GO:0009898;GO:0016714;GO:0019899;GO:0030424;GO:0031410;GO:0033162;GO:0042416;GO:0042418;GO:0042421;GO:0042423;GO:0042462;GO:0042755;GO:0043005;GO:0043005;GO:0043204;GO:0045471;GO:…	K00501	EC:1.14.16.2	-	-	tyrosine hydroxylase [Source:NCBI gene;Acc:395592]	395592	Q9PU40	GO:0001666//response to hypoxia;GO:0001963//synaptic transmission, dopaminergic;GO:0006585//dopamine biosynthetic process from tyrosine;GO:0007507//heart development;GO:0007601//visual perception;GO:0007612//learning;GO:0007613//memory;GO:0007617//mating behavior;GO:0007626//locomotory behavior;GO:0008016//regulation of heart contraction;GO:0009072//aromatic amino acid family metabolic process;GO…	GO:0005634//nucleus;GO:0005737//cytoplasm;GO:0005737//cytoplasm;GO:0005790//smooth endoplasmic reticulum;GO:0009898//cytoplasmic side of plasma membrane;GO:0030424//axon;GO:0031410//cytoplasmic vesicle;GO:0033162//melanosome membrane;GO:0043005//neuron projection;GO:0043005//neuron projection;GO:0043204//perikaryon;GO:0048471//perinuclear region of cytoplasm;	GO:0004497//monooxygenase activity;GO:0004511//tyrosine 3-monooxygenase activity;GO:0004511//tyrosine 3-monooxygenase activity;GO:0005506//iron ion binding;GO:0016714//oxidoreductase activity, acting on paired donors, with incorporation or reduction of molecular oxygen, reduced pteridine as one donor, and incorporation of one atom of oxygen;GO:0019899//enzyme binding;	ko05034(Alcoholism);ko05031(Amphetamine addiction);ko05030(Cocaine addiction);ko05012(Parkinson disease);ko04917(Prolactin signaling pathway);ko04728(Dopaminergic synapse);ko00950(Isoquinoline alkaloid biosynthesis);ko00790(Folate biosynthesis);ko00350(Tyrosine metabolism)
ENSGALG00000033781	254.997	287.512	222.483	0.773822	-0.369927	0.00812186	0.569245	Nodiff	5	488088	490498	+	2411	FEN1	GO:0000287;GO:0000287;GO:0000781;GO:0003677;GO:0003677;GO:0003677;GO:0003677;GO:0003824;GO:0003824;GO:0004518;GO:0004518;GO:0004518;GO:0004519;GO:0004523;GO:0004523;GO:0004527;GO:0005634;GO:0005634;GO:0005634;GO:0005654;GO:0005654;GO:0005730;GO:0005730;GO:0005739;GO:0005739;GO:0006260;GO:0006281;GO:0006284;GO:0006974;GO:0008409;GO:0008409;GO:0008409;GO:0016787;GO:0016788;GO:0016788;GO:0017108;GO:…	K04799	EC:3.1.-.-	-	-	flap structure-specific endonuclease 1 [Source:NCBI gene;Acc:769677]	769677	Q5ZLN4	GO:0006260//DNA replication;GO:0006281//DNA repair;GO:0006284//base-excision repair;GO:0006974//cellular response to DNA damage stimulus;GO:0043137//DNA replication, removal of RNA primer;GO:0043137//DNA replication, removal of RNA primer;GO:0045876//positive regulation of sister chromatid cohesion;GO:0090305//nucleic acid phosphodiester bond hydrolysis;GO:0090502//RNA phosphodiester bond hydroly…	GO:0000781//chromosome, telomeric region;GO:0005634//nucleus;GO:0005634//nucleus;GO:0005634//nucleus;GO:0005654//nucleoplasm;GO:0005654//nucleoplasm;GO:0005730//nucleolus;GO:0005730//nucleolus;GO:0005739//mitochondrion;GO:0005739//mitochondrion;GO:0032991//protein-containing complex;	GO:0000287//magnesium ion binding;GO:0000287//magnesium ion binding;GO:0003677//DNA binding;GO:0003677//DNA binding;GO:0003677//DNA binding;GO:0003677//DNA binding;GO:0003824//catalytic activity;GO:0003824//catalytic activity;GO:0004518//nuclease activity;GO:0004518//nuclease activity;GO:0004518//nuclease activity;GO:0004519//endonuclease activity;GO:0004523//RNA-DNA hybrid ribonuclease activity;…	ko03450(Non-homologous end-joining);ko03410(Base excision repair);ko03030(DNA replication)
ENSGALG00000000747	4618.02	4956.4	4279.65	0.863458	-0.211802	0.00819241	0.569245	Nodiff	21	645544	673036	+	6296	CHD5	GO:0003677;GO:0003678;GO:0005524;GO:0005634;GO:0005654;GO:0005829;GO:0006357;GO:0016607;GO:0061628;GO:0070615;GO:0098532;GO:0003677;GO:0003678;GO:0005524;GO:0070615;	K14435	EC:5.6.2.-	K;L	KOG0383;38BGB;3B940;3CVFP;4842R;48XGU;4GRK6	chromodomain helicase DNA binding protein 5 [Source:NCBI gene;Acc:100857108]	100857108	-	GO:0006357//regulation of transcription by RNA polymerase II;GO:0098532//histone H3-K27 trimethylation;	GO:0005634//nucleus;GO:0005654//nucleoplasm;GO:0005829//cytosol;GO:0016607//nuclear speck;	GO:0003677//DNA binding;GO:0003678//DNA helicase activity;GO:0005524//ATP binding;GO:0061628//H3K27me3 modified histone binding;GO:0070615//ATP-dependent chromatin remodeler activity;GO:0003677//DNA binding;GO:0003678//DNA helicase activity;GO:0005524//ATP binding;GO:0070615//ATP-dependent chromatin remodeler activity;	-
ENSGALG00000031496	95.043	139.163	50.9226	0.36592	-1.4504	0.00826453	0.569245	Down Regulation	13	11260862	11270908	+	1726	SPINK5	GO:0005515;GO:0005515;	K23615	-	S	KOG3649;39TKW;3BKG3;3E6AW;48RRH;49NSZ;4GHA0	serine peptidase inhibitor, Kazal type 5 [Source:NCBI gene;Acc:416235]	416235	-	-	-	GO:0005515//protein binding;GO:0005515//protein binding;	-
ENSGALG00000034939	702.023	781.742	622.303	0.796046	-0.329077	0.00827515	0.569245	Nodiff	5	656839	659426	+	1686	-	GO:0005548;GO:0005548;GO:0005737;GO:0008525;GO:0008526;GO:0015914;GO:0015914;GO:0031210;GO:0035091;GO:0120009;	K24069	-	-	-	-	769912	-	GO:0015914//phospholipid transport;GO:0015914//phospholipid transport;GO:0120009//intermembrane lipid transfer;	GO:0005737//cytoplasm;	GO:0005548//phospholipid transporter activity;GO:0005548//phospholipid transporter activity;GO:0008525//phosphatidylcholine transporter activity;GO:0008526//phosphatidylinositol transfer activity;GO:0031210//phosphatidylcholine binding;GO:0035091//phosphatidylinositol binding;	-
ENSGALG00000041083	757.711	845.741	669.68	0.791826	-0.336745	0.00830964	0.569245	Nodiff	1	145718083	145721881	-	1437	ZIC2	GO:0005654;GO:0016604;	K06235	-	-	-	Zic family member 2 [Source:NCBI gene;Acc:428021]	428021	A0A1D5PNB7	-	GO:0005654//nucleoplasm;GO:0016604//nuclear body;	-	-
ENSGALG00000046811	2344.11	2525.54	2162.69	0.856325	-0.22377	0.00834336	0.569245	Nodiff	33	6279785	6287371	-	1638	STIP1	GO:0005515;GO:0032991;GO:0051879;GO:0098761;GO:0101031;	-	-	-	-	stress induced phosphoprotein 1 [Source:NCBI gene;Acc:101748085]	-	-	GO:0098761//cellular response to interleukin-7;	GO:0032991//protein-containing complex;GO:0101031//chaperone complex;	GO:0005515//protein binding;GO:0051879//Hsp90 protein binding;	-
ENSGALG00000003560	481.501	536.824	426.178	0.793888	-0.332993	0.00834374	0.569245	Nodiff	11	3571368	3634461	-	2915	SLC6A2	GO:0003779;GO:0005326;GO:0005328;GO:0005887;GO:0006836;GO:0006836;GO:0008504;GO:0008504;GO:0015844;GO:0016020;GO:0016021;GO:0048265;GO:0051620;GO:0098810;GO:0005328;GO:0005328;GO:0005887;GO:0005887;GO:0006836;GO:0006836;GO:0015293;GO:0016020;GO:0016020;GO:0016020;GO:0016021;GO:0016021;GO:0016021;GO:0055085;GO:0090277;	K05035	-	D;P;Z;T	KOG3659;38EMT;3BA4J;3CXF1;482VT;48VA7;4GMUJ	solute carrier family 6 member 2 [Source:NCBI gene;Acc:395458]	395458	Q9DGN5	GO:0006836//neurotransmitter transport;GO:0006836//neurotransmitter transport;GO:0015844//monoamine transport;GO:0048265//response to pain;GO:0051620//norepinephrine uptake;GO:0098810//neurotransmitter reuptake;GO:0006836//neurotransmitter transport;GO:0006836//neurotransmitter transport;GO:0055085//transmembrane transport;GO:0090277//positive regulation of peptide hormone secretion;	GO:0005887//integral component of plasma membrane;GO:0016020//membrane;GO:0016021//integral component of membrane;GO:0005887//integral component of plasma membrane;GO:0005887//integral component of plasma membrane;GO:0016020//membrane;GO:0016020//membrane;GO:0016020//membrane;GO:0016021//integral component of membrane;GO:0016021//integral component of membrane;GO:0016021//integral component of me…	GO:0003779//actin binding;GO:0005326//neurotransmitter transmembrane transporter activity;GO:0005328//neurotransmitter:sodium symporter activity;GO:0008504//monoamine transmembrane transporter activity;GO:0008504//monoamine transmembrane transporter activity;GO:0005328//neurotransmitter:sodium symporter activity;GO:0005328//neurotransmitter:sodium symporter activity;GO:0015293//symporter activity;	ko04721(Synaptic vesicle cycle)
ENSGALG00000015320	1559.83	1290.05	1829.6	1.41824	0.5041	0.00836601	0.569245	Nodiff	Z	52098369	52107270	-	2694	NANS	GO:0003824;GO:0003824;GO:0016051;GO:0016051;GO:0047444;GO:0070085;	K05304	-	M	2QR5J;38GRA;3B9DK;3CUPX;48AN0;493U0;4GINS	N-acetylneuraminate synthase [Source:NCBI gene;Acc:427283]	427283	Q5ZMH8	GO:0016051//carbohydrate biosynthetic process;GO:0016051//carbohydrate biosynthetic process;GO:0070085//glycosylation;	-	GO:0003824//catalytic activity;GO:0003824//catalytic activity;GO:0047444//N-acylneuraminate-9-phosphate synthase activity;	ko00520(Amino sugar and nucleotide sugar metabolism)
ENSGALG00000054250	256.792	291.816	221.769	0.759961	-0.396004	0.00840799	0.569677	Nodiff	30	1471476	1477699	-	3719	-	-	-	-	-	-	voltage-dependent P/Q-type calcium channel subunit alpha-1A-like [Source:NCBI gene;Acc:107050975]	-	-	-	-	-	-
ENSGALG00000002523	776.991	684.764	869.217	1.26937	0.344108	0.00852037	0.573868	Nodiff	Z	9167587	9172144	-	2264	CREB3	GO:0000977;GO:0000978;GO:0000981;GO:0001228;GO:0003700;GO:0005634;GO:0005783;GO:0005829;GO:0006355;GO:0006990;GO:0030968;GO:0035497;GO:0042802;GO:0045944;GO:0045944;GO:0090026;GO:1902236;GO:1990837;	K09048	-	L;K	KOG0709;38BX7;3BA8X;3CYYZ;48BCI;4924C;4GWS3	cAMP responsive element binding protein 3 like 4 [Source:NCBI gene;Acc:427417]	427417	-	GO:0006355//regulation of transcription, DNA-templated;GO:0006990//positive regulation of transcription from RNA polymerase II promoter involved in unfolded protein response;GO:0030968//endoplasmic reticulum unfolded protein response;GO:0045944//positive regulation of transcription by RNA polymerase II;GO:0045944//positive regulation of transcription by RNA polymerase II;GO:0090026//positive regu…	GO:0005634//nucleus;GO:0005783//endoplasmic reticulum;GO:0005829//cytosol;	GO:0000977//RNA polymerase II transcription regulatory region sequence-specific DNA binding;GO:0000978//RNA polymerase II cis-regulatory region sequence-specific DNA binding;GO:0000981//DNA-binding transcription factor activity, RNA polymerase II-specific;GO:0001228//DNA-binding transcription activator activity, RNA polymerase II-specific;GO:0003700//DNA-binding transcription factor activity;GO:0…	ko05215(Prostate cancer);ko05207(Chemical carcinogenesis - receptor activation);ko05203(Viral carcinogenesis);ko05166(Human T-cell leukemia virus 1 infection);ko05165(Human papillomavirus infection);ko05163(Human cytomegalovirus infection);ko05161(Hepatitis B);ko05034(Alcoholism);ko05031(Amphetamine addiction);ko05030(Cocaine addiction);ko05020(Prion disease);ko05016(Huntington disease);ko04962(V…
ENSGALG00000050814	186.937	218.327	155.547	0.712449	-0.489141	0.00854163	0.573868	Nodiff	2	15910728	15919796	+	2628	-	GO:0016021;	-	-	-	-	patched domain containing 3 [Source:NCBI gene;Acc:428417]	-	-	-	GO:0016021//integral component of membrane;	-	-
ENSGALG00000051538	12.7188	18.6206	6.81702	0.366101	-1.44968	0.00858442	0.573967	Down Regulation	4	60068450	60070516	-	2067	-	-	-	-	-	-	-	-	-	-	-	-	-
ENSGALG00000028357	30.2522	19.7667	40.7377	2.06092	1.04329	0.00863417	0.573967	Up Regulation	2	19428947	19462031	-	4326	-	-	K06560	-	V;T;S	KOG4297;38GR9;3BBE1;3CTZ0;48QRV;49MBR;4GR35	macrophage mannose receptor 1-like [Source:NCBI gene;Acc:428421]	428421	M1XGN6	-	-	-	ko05152(Tuberculosis);ko04145(Phagosome)
ENSGALG00000054943	701.432	768.045	634.819	0.826539	-0.274846	0.00866217	0.573967	Nodiff	14	2621095	2625401	-	291	-	GO:0005096;GO:0005096;GO:0005886;GO:0043231;GO:0050790;	-	-	-	-	-	-	-	GO:0050790//regulation of catalytic activity;	GO:0005886//plasma membrane;GO:0043231//intracellular membrane-bounded organelle;	GO:0005096//GTPase activator activity;GO:0005096//GTPase activator activity;	-
ENSGALG00000035047	229.433	258.492	200.374	0.775165	-0.367425	0.00869819	0.573967	Nodiff	3	4388382	4391639	+	753	-	-	-	-	-	-	heme-binding protein 1-like [Source:NCBI gene;Acc:107052850]	107052850	-	-	-	-	-
ENSGALG00000015180	2282.44	2081.5	2483.39	1.19307	0.254683	0.00872258	0.573967	Nodiff	Z	37974730	37990032	+	2764	PSAT1	GO:0003824;GO:0004648;GO:0005829;GO:0006564;GO:0042802;	K00831	EC:2.6.1.52	E	KOG2790;38B9C;3BGD1;3CWFZ;485VP;496QZ;4GKH8	phosphoserine aminotransferase 1 [Source:NCBI gene;Acc:427263]	427263	F1NTK1	GO:0006564//L-serine biosynthetic process;	GO:0005829//cytosol;	GO:0003824//catalytic activity;GO:0004648//O-phospho-L-serine:2-oxoglutarate aminotransferase activity;GO:0042802//identical protein binding;	ko00750(Vitamin B6 metabolism);ko00680(Methane metabolism);ko00270(Cysteine and methionine metabolism);ko00260(Glycine, serine and threonine metabolism)
ENSGALG00000036782	169.972	193.96	145.983	0.752648	-0.409953	0.00877714	0.57519	Nodiff	23	2316905	2322177	-	1237	OPRD1	GO:0004930;GO:0004985;GO:0004985;GO:0007186;GO:0007186;GO:0010629;GO:0016021;GO:0031226;GO:0031333;GO:0033138;GO:0038003;GO:0038046;GO:0038046;GO:0051881;GO:0071456;GO:0097237;	K04213	-	-	-	opioid receptor delta 1 [Source:NCBI gene;Acc:429951]	429951	-	GO:0007186//G protein-coupled receptor signaling pathway;GO:0007186//G protein-coupled receptor signaling pathway;GO:0010629//negative regulation of gene expression;GO:0031333//negative regulation of protein-containing complex assembly;GO:0033138//positive regulation of peptidyl-serine phosphorylation;GO:0038003//G protein-coupled opioid receptor signaling pathway;GO:0051881//regulation of mitoch…	GO:0016021//integral component of membrane;GO:0031226//intrinsic component of plasma membrane;	GO:0004930//G protein-coupled receptor activity;GO:0004985//G protein-coupled opioid receptor activity;GO:0004985//G protein-coupled opioid receptor activity;GO:0038046//G protein-coupled enkephalin receptor activity;GO:0038046//G protein-coupled enkephalin receptor activity;	ko04080(Neuroactive ligand-receptor interaction);ko04071(Sphingolipid signaling pathway);ko04022(cGMP-PKG signaling pathway)
ENSGALG00000006290	344.915	384.387	305.443	0.794622	-0.331659	0.00882793	0.576158	Nodiff	14	7497239	7540825	+	1738	HS3ST4	GO:0008146;	-	-	-	-	heparan sulfate-glucosamine 3-sulfotransferase 4 [Source:NCBI gene;Acc:427674]	-	-	-	-	GO:0008146//sulfotransferase activity;	-
ENSGALG00000038634	688.488	623.81	753.165	1.20736	0.271859	0.00888655	0.577626	Nodiff	4	65269770	65321836	-	5043	KIT	GO:0000166;GO:0001541;GO:0001650;GO:0002020;GO:0002244;GO:0002318;GO:0002320;GO:0002327;GO:0002551;GO:0002573;GO:0002732;GO:0004672;GO:0004672;GO:0004713;GO:0004713;GO:0004713;GO:0004714;GO:0004714;GO:0004714;GO:0004714;GO:0004714;GO:0004714;GO:0005020;GO:0005524;GO:0005524;GO:0005524;GO:0005615;GO:0005886;GO:0005886;GO:0005887;GO:0005911;GO:0006468;GO:0006468;GO:0006468;GO:0006687;GO:0006954;GO:…	K05091	EC:2.7.10.1	-	-	KIT proto-oncogene receptor tyrosine kinase [Source:NCBI gene;Acc:378783]	378783	Q08156	GO:0001541//ovarian follicle development;GO:0002244//hematopoietic progenitor cell differentiation;GO:0002318//myeloid progenitor cell differentiation;GO:0002320//lymphoid progenitor cell differentiation;GO:0002327//immature B cell differentiation;GO:0002551//mast cell chemotaxis;GO:0002573//myeloid leukocyte differentiation;GO:0002732//positive regulation of dendritic cell cytokine production;GO…	GO:0001650//fibrillar center;GO:0005615//extracellular space;GO:0005886//plasma membrane;GO:0005886//plasma membrane;GO:0005887//integral component of plasma membrane;GO:0005911//cell-cell junction;GO:0009897//external side of plasma membrane;GO:0009986//cell surface;GO:0016020//membrane;GO:0016021//integral component of membrane;GO:0043235//receptor complex;	GO:0000166//nucleotide binding;GO:0002020//protease binding;GO:0004672//protein kinase activity;GO:0004672//protein kinase activity;GO:0004713//protein tyrosine kinase activity;GO:0004713//protein tyrosine kinase activity;GO:0004713//protein tyrosine kinase activity;GO:0004714//transmembrane receptor protein tyrosine kinase activity;GO:0004714//transmembrane receptor protein tyrosine kinase activ…	ko05230(Central carbon metabolism in cancer);ko05224(Breast cancer);ko05221(Acute myeloid leukemia);ko05200(Pathways in cancer);ko04916(Melanogenesis);ko04640(Hematopoietic cell lineage);ko04151(PI3K-Akt signaling pathway);ko04072(Phospholipase D signaling pathway);ko04015(Rap1 signaling pathway);ko04014(Ras signaling pathway);ko04010(MAPK signaling pathway)
ENSGALG00000026311	280.13	245.664	314.597	1.2806	0.356817	0.00909	0.587087	Nodiff	1	54179279	54183383	-	1122	C12orf75	-	-	-	S	2SSZ4;3AC6Y;3BUT9;3DBJ2;48GMD;49DIC;4GVNZ	chromosome 12 open reading frame 75 [Source:NCBI gene;Acc:771624]	771624	P0C915	-	-	-	-
ENSGALG00000032595	577.729	632.515	522.944	0.826769	-0.274443	0.00910553	0.587087	Nodiff	1	56918175	56918981	+	654	NDUFB2	GO:0005743;GO:0005747;GO:0005743;GO:0005747;GO:0005747;GO:0032981;	K03958	-	-	-	NADH:ubiquinone oxidoreductase subunit B2 [Source:NCBI gene;Acc:418118]	418118	A0A1D5PRB6	GO:0032981//mitochondrial respiratory chain complex I assembly;	GO:0005743//mitochondrial inner membrane;GO:0005747//mitochondrial respiratory chain complex I;GO:0005743//mitochondrial inner membrane;GO:0005747//mitochondrial respiratory chain complex I;GO:0005747//mitochondrial respiratory chain complex I;	-	ko05415(Diabetic cardiomyopathy);ko05208(Chemical carcinogenesis - reactive oxygen species);ko05022(Pathways of neurodegeneration - multiple diseases);ko05020(Prion disease);ko05016(Huntington disease);ko05014(Amyotrophic lateral sclerosis);ko05012(Parkinson disease);ko05010(Alzheimer disease);ko04932(Non-alcoholic fatty liver disease);ko04723(Retrograde endocannabinoid signaling);ko04714(Thermog…
ENSGALG00000005298	923.904	1004.65	843.159	0.839258	-0.252814	0.00915933	0.588184	Nodiff	17	5241069	5246953	+	1017	-	GO:0001574;GO:0001665;GO:0005737;GO:0006486;GO:0008373;GO:0008373;GO:0009312;GO:0006486;GO:0008373;GO:0006486;GO:0008373;	K03376	EC:2.4.99.-	M;G	KOG2692;395UX;3BDUV;3CUBE;481FI;4968V;4GHBW	ST6 N-acetylgalactosaminide alpha-2,6- sialyltransferase 6 [Source:NCBI gene;Acc:425243]	425243	A0A3Q2UCV8	GO:0001574//ganglioside biosynthetic process;GO:0006486//protein glycosylation;GO:0009312//oligosaccharide biosynthetic process;GO:0006486//protein glycosylation;GO:0006486//protein glycosylation;	GO:0005737//cytoplasm;	GO:0001665//alpha-N-acetylgalactosaminide alpha-2,6-sialyltransferase activity;GO:0008373//sialyltransferase activity;GO:0008373//sialyltransferase activity;GO:0008373//sialyltransferase activity;GO:0008373//sialyltransferase activity;	ko00604(Glycosphingolipid biosynthesis - ganglio series)
ENSGALG00000019077	1304.75	1196.62	1412.87	1.18072	0.239661	0.00926662	0.592693	Nodiff	1	178515945	178724914	+	5615	-	GO:0005085;GO:0005515;GO:0005085;GO:0005515;GO:0005085;GO:0005515;GO:0005085;GO:0005515;GO:0005085;GO:0005515;GO:0005085;GO:0005515;	-	-	T;I	KOG3519;38H4U;3BAWQ;3CTCW;48194;49869;4GMPW	spermatogenesis associated 13 [Source:NCBI gene;Acc:418940]	-	-	-	-	GO:0005085//guanyl-nucleotide exchange factor activity;GO:0005515//protein binding;GO:0005085//guanyl-nucleotide exchange factor activity;GO:0005515//protein binding;GO:0005085//guanyl-nucleotide exchange factor activity;GO:0005515//protein binding;GO:0005085//guanyl-nucleotide exchange factor activity;GO:0005515//protein binding;GO:0005085//guanyl-nucleotide exchange factor activity;GO:0005515//…	-
ENSGALG00000003416	657.005	718.415	595.594	0.829039	-0.270488	0.0093403	0.594478	Nodiff	1	197379735	197386740	-	3753	FHIP1B	GO:0007032;GO:0007040;GO:0008333;GO:0045022;GO:0070695;GO:1905719;	-	-	K;S	KOG3695;38C7C;3BHGV;3CUXW;4875Q;49872;4GT9W	family with sequence similarity 160, member A2 [Source:NCBI gene;Acc:425130]	425130	A0A3Q2TUN0	GO:0007032//endosome organization;GO:0007040//lysosome organization;GO:0008333//endosome to lysosome transport;GO:0045022//early endosome to late endosome transport;GO:1905719//protein localization to perinuclear region of cytoplasm;	GO:0070695//FHF complex;	-	-
ENSGALG00000026091	322.577	358.82	286.334	0.797987	-0.325562	0.00936889	0.594478	Nodiff	18	7236970	7272838	-	1573	CACNG4	GO:0005245;GO:0005246;GO:0005891;GO:0006816;GO:0016020;GO:0016021;GO:0019226;GO:0032281;GO:0036477;GO:0070588;GO:0098962;GO:0098978;GO:1990454;GO:2000311;GO:2000311;	K04869	-	P	2QPQH;38W1P;3BJ3R;3CYC5;489EA;48X05;4GRXZ	calcium voltage-gated channel auxiliary subunit gamma 4 [Source:NCBI gene;Acc:373924]	373924	Q90X18	GO:0006816//calcium ion transport;GO:0019226//transmission of nerve impulse;GO:0070588//calcium ion transmembrane transport;GO:0098962//regulation of postsynaptic neurotransmitter receptor activity;GO:2000311//regulation of AMPA receptor activity;GO:2000311//regulation of AMPA receptor activity;	GO:0005891//voltage-gated calcium channel complex;GO:0016020//membrane;GO:0016021//integral component of membrane;GO:0032281//AMPA glutamate receptor complex;GO:0036477//somatodendritic compartment;GO:0098978//glutamatergic synapse;GO:1990454//L-type voltage-gated calcium channel complex;	GO:0005245//voltage-gated calcium channel activity;GO:0005246//calcium channel regulator activity;	ko05414(Dilated cardiomyopathy);ko05412(Arrhythmogenic right ventricular cardiomyopathy);ko05410(Hypertrophic cardiomyopathy);ko04921(Oxytocin signaling pathway);ko04261(Adrenergic signaling in cardiomyocytes);ko04260(Cardiac muscle contraction);ko04010(MAPK signaling pathway)
ENSGALG00000008898	8578.19	9182.86	7973.52	0.868305	-0.203727	0.00946801	0.598393	Nodiff	17	1366340	1396917	-	4140	GRIN1	GO:0004970;GO:0005216;GO:0006811;GO:0015276;GO:0016020;GO:0038023;GO:0004970;GO:0004970;GO:0004972;GO:0004972;GO:0005216;GO:0005216;GO:0005262;GO:0005886;GO:0005886;GO:0005886;GO:0005887;GO:0006811;GO:0006811;GO:0006811;GO:0006812;GO:0007268;GO:0015276;GO:0015276;GO:0015276;GO:0016020;GO:0016020;GO:0016020;GO:0016021;GO:0016594;GO:0016595;GO:0017146;GO:0017146;GO:0019722;GO:0022849;GO:0030054;GO:…	K05208	-	P;U;E;T	KOG4440;38HRX;3BAB8;3CZDT;48378;48V4C;4GM1V	glutamate ionotropic receptor NMDA type subunit 1 [Source:NCBI gene;Acc:404296]	404296	Q6R6I2	GO:0006811//ion transport;GO:0006811//ion transport;GO:0006811//ion transport;GO:0006811//ion transport;GO:0006812//cation transport;GO:0007268//chemical synaptic transmission;GO:0019722//calcium-mediated signaling;GO:0035235//ionotropic glutamate receptor signaling pathway;GO:0035235//ionotropic glutamate receptor signaling pathway;GO:0042221//response to chemical;GO:0042391//regulation of membr…	GO:0016020//membrane;GO:0005886//plasma membrane;GO:0005886//plasma membrane;GO:0005886//plasma membrane;GO:0005887//integral component of plasma membrane;GO:0016020//membrane;GO:0016020//membrane;GO:0016020//membrane;GO:0016021//integral component of membrane;GO:0017146//NMDA selective glutamate receptor complex;GO:0017146//NMDA selective glutamate receptor complex;GO:0030054//cell junction;GO:0…	GO:0004970//ionotropic glutamate receptor activity;GO:0005216//ion channel activity;GO:0015276//ligand-gated ion channel activity;GO:0038023//signaling receptor activity;GO:0004970//ionotropic glutamate receptor activity;GO:0004970//ionotropic glutamate receptor activity;GO:0004972//NMDA glutamate receptor activity;GO:0004972//NMDA glutamate receptor activity;GO:0005216//ion channel activity;GO:0…	ko05034(Alcoholism);ko05033(Nicotine addiction);ko05031(Amphetamine addiction);ko05030(Cocaine addiction);ko05022(Pathways of neurodegeneration - multiple diseases);ko05020(Prion disease);ko05017(Spinocerebellar ataxia);ko05016(Huntington disease);ko05014(Amyotrophic lateral sclerosis);ko05010(Alzheimer disease);ko04724(Glutamatergic synapse);ko04720(Long-term potentiation);ko04713(Circadian entr…
ENSGALG00000011117	16695.4	15487.7	17903.2	1.15597	0.209099	0.0095364	0.598767	Nodiff	3	40543177	40555076	-	3109	AGT	GO:0001822;GO:0003014;GO:0003081;GO:0003081;GO:0004867;GO:0004867;GO:0005576;GO:0005615;GO:0005615;GO:0005615;GO:0007186;GO:0008217;GO:0010536;GO:0010595;GO:0010873;GO:0010951;GO:0014068;GO:0031702;GO:0031703;GO:0032270;GO:0042310;GO:0043407;GO:0045742;GO:0045893;GO:0050731;GO:0051387;GO:0061098;GO:0090190;GO:1901201;GO:1903598;GO:1903779;GO:2001238;GO:0003081;GO:0003081;GO:0004867;GO:0004867;GO:…	K09821	-	V;O	KOG2392;38CNW;3BACT;3CYTZ;487YB;4916Q;4GT6C	angiotensinogen [Source:NCBI gene;Acc:421543]	421543	F1NDH2	GO:0001822//kidney development;GO:0003014//renal system process;GO:0003081//regulation of systemic arterial blood pressure by renin-angiotensin;GO:0003081//regulation of systemic arterial blood pressure by renin-angiotensin;GO:0007186//G protein-coupled receptor signaling pathway;GO:0008217//regulation of blood pressure;GO:0010536//positive regulation of activation of Janus kinase activity;GO:001…	GO:0005576//extracellular region;GO:0005615//extracellular space;GO:0005615//extracellular space;GO:0005615//extracellular space;GO:0005576//extracellular region;GO:0005615//extracellular space;GO:0005615//extracellular space;	GO:0004867//serine-type endopeptidase inhibitor activity;GO:0004867//serine-type endopeptidase inhibitor activity;GO:0031702//type 1 angiotensin receptor binding;GO:0031703//type 2 angiotensin receptor binding;GO:0004867//serine-type endopeptidase inhibitor activity;GO:0004867//serine-type endopeptidase inhibitor activity;	ko05415(Diabetic cardiomyopathy);ko05414(Dilated cardiomyopathy);ko05410(Hypertrophic cardiomyopathy);ko05200(Pathways in cancer);ko04934(Cushing syndrome);ko04933(AGE-RAGE signaling pathway in diabetic complications);ko04931(Insulin resistance);ko04927(Cortisol synthesis and secretion);ko04925(Aldosterone synthesis and secretion);ko04924(Renin secretion);ko04614(Renin-angiotensin system);ko04270…
ENSGALG00000047125	485.002	540.949	429.056	0.793155	-0.334325	0.00954882	0.598767	Nodiff	5	651021	659566	+	1413	-	GO:0005548;GO:0005548;GO:0005737;GO:0008525;GO:0008526;GO:0015914;GO:0015914;GO:0031210;GO:0035091;GO:0120009;	-	-	-	-	-	-	-	GO:0015914//phospholipid transport;GO:0015914//phospholipid transport;GO:0120009//intermembrane lipid transfer;	GO:0005737//cytoplasm;	GO:0005548//phospholipid transporter activity;GO:0005548//phospholipid transporter activity;GO:0008525//phosphatidylcholine transporter activity;GO:0008526//phosphatidylinositol transfer activity;GO:0031210//phosphatidylcholine binding;GO:0035091//phosphatidylinositol binding;	-
ENSGALG00000042810	1218.44	1083.51	1353.37	1.24906	0.320841	0.00967224	0.604137	Nodiff	14	15043163	15046202	+	3040	-	-	-	-	-	-	-	-	-	-	-	-	-
ENSGALG00000009289	1294.47	1397.06	1191.89	0.853146	-0.229135	0.00976539	0.607582	Nodiff	6	30092809	30110773	+	1902	SLC18A2	GO:0001975;GO:0005813;GO:0007626;GO:0009636;GO:0009791;GO:0016021;GO:0022857;GO:0042908;GO:0042910;GO:0043231;GO:0055085;GO:0098691;GO:0098700;	K08155	-	U;J	KOG3764;38CBP;3BEZR;3CTHD;4809B;48WXP;4GPFZ	solute carrier family 18 member A2 [Source:NCBI gene;Acc:423921]	423921	-	GO:0001975//response to amphetamine;GO:0007626//locomotory behavior;GO:0009636//response to toxic substance;GO:0009791//post-embryonic development;GO:0042908//xenobiotic transport;GO:0055085//transmembrane transport;GO:0098700//neurotransmitter loading into synaptic vesicle;	GO:0005813//centrosome;GO:0016021//integral component of membrane;GO:0043231//intracellular membrane-bounded organelle;GO:0098691//dopaminergic synapse;	GO:0022857//transmembrane transporter activity;GO:0042910//xenobiotic transmembrane transporter activity;	ko05034(Alcoholism);ko05031(Amphetamine addiction);ko05030(Cocaine addiction);ko05012(Parkinson disease);ko04728(Dopaminergic synapse);ko04726(Serotonergic synapse);ko04721(Synaptic vesicle cycle)
ENSGALG00000002553	1418.86	1538.84	1298.87	0.844062	-0.244579	0.00988174	0.612438	Nodiff	13	2788001	2834253	+	4091	PCDH1	GO:0005509;GO:0005654;GO:0005730;GO:0005886;GO:0007155;GO:0007156;GO:0016020;GO:0030054;GO:0043231;GO:0005509;GO:0005886;GO:0007155;GO:0007156;GO:0016020;	K16498	-	S;T	2QWB7;39FUM;3BH6P;3CWZG;48192;48V0N;4GNW9	protocadherin 1 [Source:NCBI gene;Acc:416194]	416194	Q6DKR3	GO:0007155//cell adhesion;GO:0007156//homophilic cell adhesion via plasma membrane adhesion molecules;GO:0007155//cell adhesion;GO:0007156//homophilic cell adhesion via plasma membrane adhesion molecules;	GO:0005654//nucleoplasm;GO:0005730//nucleolus;GO:0005886//plasma membrane;GO:0016020//membrane;GO:0030054//cell junction;GO:0043231//intracellular membrane-bounded organelle;GO:0005886//plasma membrane;GO:0016020//membrane;	GO:0005509//calcium ion binding;GO:0005509//calcium ion binding;	-
ENSGALG00000017035	2704.4	2505.78	2903.02	1.15853	0.212296	0.0100113	0.61795	Nodiff	1	172218067	172269368	-	3670	COG6	GO:0006891;GO:0017119;GO:0017119;GO:0070085;GO:0006891;GO:0017119;	K20293	-	S;U	KOG3758;38DBZ;3BC45;3CTIF;489HN;4905S;4GP9K	component of oligomeric golgi complex 6 [Source:NCBI gene;Acc:418888]	418888	A0A3Q2UCG9	GO:0006891//intra-Golgi vesicle-mediated transport;GO:0070085//glycosylation;GO:0006891//intra-Golgi vesicle-mediated transport;	GO:0017119//Golgi transport complex;GO:0017119//Golgi transport complex;GO:0017119//Golgi transport complex;	-	-
ENSGALG00000028069	12.4753	18.1159	6.83482	0.377284	-1.40628	0.010048	0.61795	Down Regulation	1	23387565	23397783	-	2518	WNT16	GO:0005102;GO:0005576;GO:0005615;GO:0005737;GO:0007275;GO:0010628;GO:0014068;GO:0016055;GO:0030216;GO:0043616;GO:0046330;GO:0046849;GO:0060317;GO:0060548;GO:0090399;GO:0090403;GO:0005102;GO:0005576;GO:0007275;GO:0016055;GO:0005102;GO:0005576;GO:0007275;GO:0016055;	K01558	-	M;T	KOG3913;39THQ;3BJ1J;3CXDI;4810P;48YDX;4GMUW	Wnt family member 16 [Source:NCBI gene;Acc:427856]	427856	R4GLW1	GO:0007275//multicellular organism development;GO:0010628//positive regulation of gene expression;GO:0014068//positive regulation of phosphatidylinositol 3-kinase signaling;GO:0016055//Wnt signaling pathway;GO:0030216//keratinocyte differentiation;GO:0043616//keratinocyte proliferation;GO:0046330//positive regulation of JNK cascade;GO:0046849//bone remodeling;GO:0060317//cardiac epithelial to mes…	GO:0005576//extracellular region;GO:0005615//extracellular space;GO:0005737//cytoplasm;GO:0005576//extracellular region;GO:0005576//extracellular region;	GO:0005102//signaling receptor binding;GO:0005102//signaling receptor binding;GO:0005102//signaling receptor binding;	ko05226(Gastric cancer);ko05225(Hepatocellular carcinoma);ko05224(Breast cancer);ko05217(Basal cell carcinoma);ko05205(Proteoglycans in cancer);ko05202(Transcriptional misregulation in cancer);ko05200(Pathways in cancer);ko05165(Human papillomavirus infection);ko05022(Pathways of neurodegeneration - multiple diseases);ko05010(Alzheimer disease);ko04934(Cushing syndrome);ko04916(Melanogenesis);ko0…
ENSGALG00000010233	558.554	652.889	464.218	0.711022	-0.492034	0.0101656	0.620166	Nodiff	5	38094760	38106584	-	2306	SYNDIG1L	GO:0005794;GO:0016021;	K23906	-	S	2QPQE;39VX1;3BHA1;3CUXF;480TU;490NV;4GRHZ	synapse differentiation inducing 1 like [Source:NCBI gene;Acc:423351]	423351	E1BZT0	-	GO:0005794//Golgi apparatus;GO:0016021//integral component of membrane;	-	-
ENSGALG00000011319	1328.66	1435.03	1222.29	0.851757	-0.231485	0.0101925	0.620166	Nodiff	4	47983446	48374220	+	4822	ADGRL3	GO:0004888;GO:0004930;GO:0007166;GO:0007186;GO:0016020;GO:0016021;GO:0030246;GO:0004888;GO:0004930;GO:0007166;GO:0007186;GO:0016020;GO:0016021;GO:0030246;GO:0004888;GO:0004930;GO:0007166;GO:0007186;GO:0016020;GO:0016021;GO:0030246;GO:0004888;GO:0004930;GO:0007166;GO:0007186;GO:0016020;GO:0016021;GO:0030246;GO:0004888;GO:0004930;GO:0007166;GO:0007186;GO:0016020;GO:0016021;GO:0030246;GO:0004888;GO:…	K04594	-	T;A;S;O	KOG3545;KOG4193;KOG4729;38D0U;3BCMA;3CRTM;484Y4;48YXP;4GU1N	adhesion G protein-coupled receptor L3 [Source:NCBI gene;Acc:422616]	422616	-	GO:0007166//cell surface receptor signaling pathway;GO:0007186//G protein-coupled receptor signaling pathway;GO:0007166//cell surface receptor signaling pathway;GO:0007186//G protein-coupled receptor signaling pathway;GO:0007166//cell surface receptor signaling pathway;GO:0007186//G protein-coupled receptor signaling pathway;GO:0007166//cell surface receptor signaling pathway;GO:0007186//G protei…	GO:0016020//membrane;GO:0016021//integral component of membrane;GO:0016020//membrane;GO:0016021//integral component of membrane;GO:0016020//membrane;GO:0016021//integral component of membrane;GO:0016020//membrane;GO:0016021//integral component of membrane;GO:0016020//membrane;GO:0016021//integral component of membrane;GO:0016020//membrane;GO:0016021//integral component of membrane;GO:0016020//mem…	GO:0004888//transmembrane signaling receptor activity;GO:0004930//G protein-coupled receptor activity;GO:0030246//carbohydrate binding;GO:0004888//transmembrane signaling receptor activity;GO:0004930//G protein-coupled receptor activity;GO:0030246//carbohydrate binding;GO:0004888//transmembrane signaling receptor activity;GO:0004930//G protein-coupled receptor activity;GO:0030246//carbohydrate bi…	-
ENSGALG00000008908	67.1335	82.3915	51.8755	0.629623	-0.66744	0.0102004	0.620166	Nodiff	7	14257747	14259601	+	1589	NEUROD1	GO:0000978;GO:0000981;GO:0001228;GO:0001228;GO:0003326;GO:0003329;GO:0003677;GO:0003682;GO:0003700;GO:0005634;GO:0005634;GO:0005737;GO:0006355;GO:0007263;GO:0007399;GO:0009749;GO:0009952;GO:0021542;GO:0021549;GO:0023019;GO:0030073;GO:0030902;GO:0031018;GO:0035881;GO:0035883;GO:0042593;GO:0043010;GO:0043065;GO:0043565;GO:0043565;GO:0045165;GO:0045597;GO:0045664;GO:0045666;GO:0045893;GO:0045944;GO:…	K08033	-	K	KOG3898;396W1;3BI1A;3CW4U;47ZQR;490RA;4GNYD	neuronal differentiation 1 [Source:NCBI gene;Acc:395754]	395754	P79765	GO:0003326//pancreatic A cell fate commitment;GO:0003329//pancreatic PP cell fate commitment;GO:0006355//regulation of transcription, DNA-templated;GO:0007263//nitric oxide mediated signal transduction;GO:0007399//nervous system development;GO:0009749//response to glucose;GO:0009952//anterior/posterior pattern specification;GO:0021542//dentate gyrus development;GO:0021549//cerebellum development;…	GO:0005634//nucleus;GO:0005634//nucleus;GO:0005737//cytoplasm;GO:0090575//RNA polymerase II transcription regulator complex;	GO:0000978//RNA polymerase II cis-regulatory region sequence-specific DNA binding;GO:0000981//DNA-binding transcription factor activity, RNA polymerase II-specific;GO:0001228//DNA-binding transcription activator activity, RNA polymerase II-specific;GO:0001228//DNA-binding transcription activator activity, RNA polymerase II-specific;GO:0003677//DNA binding;GO:0003682//chromatin binding;GO:0003700/…	ko04950(Maturity onset diabetes of the young)
ENSGALG00000010311	1305.97	1411.7	1200.24	0.850204	-0.234119	0.0102396	0.620196	Nodiff	1	38750910	39004044	+	7885	NAV3	GO:0005515;GO:0005524;GO:0016887;GO:0022008;GO:0005515;GO:0005524;GO:0016887;GO:0022008;GO:0005515;GO:0005524;GO:0007026;GO:0008017;GO:0016887;GO:0022008;GO:0030336;GO:0031116;GO:0032703;GO:1990752;GO:0005515;GO:0005524;GO:0016887;GO:0022008;GO:0005515;GO:0005524;GO:0016887;GO:0022008;GO:0005515;GO:0005524;GO:0016887;GO:0022008;GO:0005515;GO:0005524;GO:0016887;GO:0022008;GO:0005515;GO:0005524;GO:…	K23919	-	Z	2QPT3;38FX8;3BF0Q;3CR89;483QK;4905Q;4GIP1	neuron navigator 3 [Source:NCBI gene;Acc:417869]	417869	-	GO:0022008//neurogenesis;GO:0022008//neurogenesis;GO:0007026//negative regulation of microtubule depolymerization;GO:0022008//neurogenesis;GO:0030336//negative regulation of cell migration;GO:0031116//positive regulation of microtubule polymerization;GO:0032703//negative regulation of interleukin-2 production;GO:0022008//neurogenesis;GO:0022008//neurogenesis;GO:0022008//neurogenesis;GO:0022008//n…	GO:1990752//microtubule end;	GO:0005515//protein binding;GO:0005524//ATP binding;GO:0016887//ATP hydrolysis activity;GO:0005515//protein binding;GO:0005524//ATP binding;GO:0016887//ATP hydrolysis activity;GO:0005515//protein binding;GO:0005524//ATP binding;GO:0008017//microtubule binding;GO:0016887//ATP hydrolysis activity;GO:0005515//protein binding;GO:0005524//ATP binding;GO:0016887//ATP hydrolysis activity;GO:0005515//pro…	-
ENSGALG00000001773	103.798	122.366	85.2307	0.696524	-0.521755	0.0103716	0.625819	Nodiff	28	1679119	1722626	-	4004	RFX2	GO:0003677;GO:0003700;GO:0005634;GO:0006355;GO:0003677;GO:0003700;GO:0005634;GO:0006355;GO:0003677;GO:0003700;GO:0005634;GO:0006355;GO:0003677;GO:0003700;GO:0005634;GO:0006355;GO:0000977;GO:0000978;GO:0001228;GO:0001675;GO:0003677;GO:0003700;GO:0003700;GO:0005634;GO:0006355;GO:0006357;GO:0007286;GO:0045944;GO:0060271;GO:1990830;GO:1990837;	K09173	-	S;K	KOG3712;38ECU;3BFUZ;3CTIU;482PD;490GD;4GKHH	regulatory factor X2 [Source:NCBI gene;Acc:420092]	420092	E1BSB3	GO:0006355//regulation of transcription, DNA-templated;GO:0006355//regulation of transcription, DNA-templated;GO:0006355//regulation of transcription, DNA-templated;GO:0006355//regulation of transcription, DNA-templated;GO:0001675//acrosome assembly;GO:0006355//regulation of transcription, DNA-templated;GO:0006357//regulation of transcription by RNA polymerase II;GO:0007286//spermatid development…	GO:0005634//nucleus;GO:0005634//nucleus;GO:0005634//nucleus;GO:0005634//nucleus;GO:0005634//nucleus;	GO:0003677//DNA binding;GO:0003700//DNA-binding transcription factor activity;GO:0003677//DNA binding;GO:0003700//DNA-binding transcription factor activity;GO:0003677//DNA binding;GO:0003700//DNA-binding transcription factor activity;GO:0003677//DNA binding;GO:0003700//DNA-binding transcription factor activity;GO:0000977//RNA polymerase II transcription regulatory region sequence-specific DNA bin…	-
ENSGALG00000001153	776.169	843.867	708.47	0.839553	-0.252307	0.0105038	0.628199	Nodiff	19	1512994	2173032	-	3756	AUTS2	GO:0003682;GO:0045944;GO:0051571;GO:2000620;	K23214	-	S	2QSH4;39E06;3BCNX;3D31Z;48026;491D7;4GMCU;2QSH4;39E06;3BCNX;3D31Z;48026;491D7;4GMCU	AUTS2, activator of transcription and developmental regulator [Source:NCBI gene;Acc:417481]	417481	-	GO:0045944//positive regulation of transcription by RNA polymerase II;GO:0051571//positive regulation of histone H3-K4 methylation;GO:2000620//positive regulation of histone H4-K16 acetylation;	-	GO:0003682//chromatin binding;	-
ENSGALG00000030179	214.2	241.604	186.795	0.773145	-0.371189	0.0105351	0.628199	Nodiff	6	12620516	12626469	-	1109	-	GO:0016021;GO:0050776;	-	-	-	-	chromosome 6 C10orf54 homolog [Source:NCBI gene;Acc:769500]	-	-	GO:0050776//regulation of immune response;	GO:0016021//integral component of membrane;	-	-
ENSGALG00000006795	1164.69	1259.88	1069.5	0.848893	-0.236345	0.0105395	0.628199	Nodiff	24	4304182	4310313	-	2058	ABCG4	GO:0005524;GO:0005886;GO:0010008;GO:0015918;GO:0016020;GO:0016887;GO:0031410;GO:0033344;GO:0033344;GO:0034041;GO:0042632;GO:0042802;GO:0042803;GO:0046982;GO:0140359;GO:1990830;	K05680	-	-	-	ATP binding cassette subfamily G member 4 [Source:NCBI gene;Acc:428242]	428242	-	GO:0015918//sterol transport;GO:0033344//cholesterol efflux;GO:0033344//cholesterol efflux;GO:0042632//cholesterol homeostasis;GO:1990830//cellular response to leukemia inhibitory factor;	GO:0005886//plasma membrane;GO:0010008//endosome membrane;GO:0016020//membrane;GO:0031410//cytoplasmic vesicle;	GO:0005524//ATP binding;GO:0016887//ATP hydrolysis activity;GO:0034041//ABC-type sterol transporter activity;GO:0042802//identical protein binding;GO:0042803//protein homodimerization activity;GO:0046982//protein heterodimerization activity;GO:0140359//ABC-type transporter activity;	ko02010(ABC transporters)
ENSGALG00000006482	53.8678	41.7025	66.0331	1.58343	0.663057	0.0105877	0.628199	Nodiff	10	13008297	13019135	-	1511	FAH	GO:0003824;GO:0004334;GO:0004334;GO:0006527;GO:0009072;	K01555	EC:3.7.1.2	G;Q	KOG2843;38HPV;3BF5X;3CT2E;482BE;4937B;4GK88	fumarylacetoacetate hydrolase [Source:NCBI gene;Acc:415482]	415482	-	GO:0006527//arginine catabolic process;GO:0009072//aromatic amino acid family metabolic process;	-	GO:0003824//catalytic activity;GO:0004334//fumarylacetoacetase activity;GO:0004334//fumarylacetoacetase activity;	ko00643(Styrene degradation);ko00350(Tyrosine metabolism)
ENSGALG00000003567	416.841	368.484	465.199	1.26247	0.336244	0.0106075	0.628199	Nodiff	23	5427586	5438486	-	941	FNDC5	GO:0005515;GO:0005576;GO:0005783;GO:0005886;GO:0014850;GO:0090336;	K24486	-	S;T	2QQCU;38P23;3BH4K;3CVWZ;47Z9Q;48Z5D;4GU3N	fibronectin type III domain containing 5 [Source:NCBI gene;Acc:419667]	419667	F1NJU4	GO:0014850//response to muscle activity;GO:0090336//positive regulation of brown fat cell differentiation;	GO:0005576//extracellular region;GO:0005783//endoplasmic reticulum;GO:0005886//plasma membrane;	GO:0005515//protein binding;	-
ENSGALG00000012952	7454.38	7974.53	6934.23	0.869547	-0.201663	0.0107156	0.62956	Nodiff	2	75358894	75406459	-	2915	BASP1	GO:0000785;GO:0000976;GO:0003714;GO:0005634;GO:0005634;GO:0005737;GO:0005737;GO:0005886;GO:0008180;GO:0016363;GO:0016605;GO:0016607;GO:0019904;GO:0030054;GO:0045892;GO:0072112;	K17272	-	S;K	2RXJZ;39ZA1;3BJF2;3D47Y;47ZDQ;498J3;4GTZ5	brain abundant membrane attached signal protein 1 [Source:NCBI gene;Acc:373905]	373905	P23614	GO:0045892//negative regulation of transcription, DNA-templated;GO:0072112//glomerular visceral epithelial cell differentiation;	GO:0000785//chromatin;GO:0005634//nucleus;GO:0005634//nucleus;GO:0005737//cytoplasm;GO:0005737//cytoplasm;GO:0005886//plasma membrane;GO:0008180//COP9 signalosome;GO:0016363//nuclear matrix;GO:0016605//PML body;GO:0016607//nuclear speck;GO:0030054//cell junction;	GO:0000976//transcription cis-regulatory region binding;GO:0003714//transcription corepressor activity;GO:0019904//protein domain specific binding;	-
ENSGALG00000039222	264.186	232.453	295.92	1.27303	0.348268	0.0107362	0.62956	Nodiff	2	126174227	126200357	+	2879	DPY19L4	GO:0016021;GO:0016021;	K24553	EC:2.4.1.-	-	-	dpy-19 like 4 (C. elegans) [Source:NCBI gene;Acc:420229]	420229	-	-	GO:0016021//integral component of membrane;GO:0016021//integral component of membrane;	-	-
ENSGALG00000043642	1534.03	1376.85	1691.21	1.22832	0.296683	0.0107599	0.62956	Nodiff	2	46674840	46702450	-	3363	ANLN	GO:0000281;GO:0000281;GO:0000915;GO:0003779;GO:0005654;GO:0005826;GO:0005826;GO:0009987;GO:0015629;GO:0030496;GO:0031106;GO:0032059;GO:0090521;GO:1904172;	-	-	-	-	anillin actin binding protein [Source:NCBI gene;Acc:420738]	-	-	GO:0000281//mitotic cytokinesis;GO:0000281//mitotic cytokinesis;GO:0000915//actomyosin contractile ring assembly;GO:0009987//cellular process;GO:0031106//septin ring organization;GO:0090521//glomerular visceral epithelial cell migration;GO:1904172//positive regulation of bleb assembly;	GO:0005654//nucleoplasm;GO:0005826//actomyosin contractile ring;GO:0005826//actomyosin contractile ring;GO:0015629//actin cytoskeleton;GO:0030496//midbody;GO:0032059//bleb;	GO:0003779//actin binding;	-
ENSGALG00000049638	1797.31	1660.86	1933.77	1.16432	0.219487	0.0108506	0.62956	Nodiff	5	685751	720725	-	654	GATD1	-	-	-	-	-	glutamine amidotransferase like class 1 domain containing 1 [Source:HGNC Symbol;Acc:HGNC:26616]	-	-	-	-	-	-
ENSGALG00000009475	792.885	722.835	862.935	1.19382	0.255585	0.0108618	0.62956	Nodiff	2	22684301	22700755	-	2926	FAM133B	-	-	-	S	2QWN4;39UHG;3BH87;3D3KW;47YW7;48ZQQ;4GPP2	family with sequence similarity 133 member B [Source:NCBI gene;Acc:420557]	-	-	-	-	-	-
ENSGALG00000031450	457.391	502.753	412.028	0.819544	-0.287106	0.0108667	0.62956	Nodiff	1	194597369	194675601	-	6592	MYO7A	GO:0000146;GO:0001750;GO:0001845;GO:0001917;GO:0003774;GO:0005515;GO:0005516;GO:0005524;GO:0005737;GO:0005737;GO:0005765;GO:0005829;GO:0005856;GO:0006886;GO:0006909;GO:0007040;GO:0007600;GO:0007601;GO:0007601;GO:0007605;GO:0007605;GO:0016324;GO:0016459;GO:0019904;GO:0030030;GO:0030048;GO:0030507;GO:0032391;GO:0032420;GO:0034613;GO:0042470;GO:0042472;GO:0042490;GO:0042491;GO:0045202;GO:0045202;GO:…	K10359	-	-	-	myosin VIIA [Source:NCBI gene;Acc:419085]	419085	-	GO:0001845//phagolysosome assembly;GO:0006886//intracellular protein transport;GO:0006909//phagocytosis;GO:0007040//lysosome organization;GO:0007600//sensory perception;GO:0007601//visual perception;GO:0007601//visual perception;GO:0007605//sensory perception of sound;GO:0007605//sensory perception of sound;GO:0030030//cell projection organization;GO:0030048//actin filament-based movement;GO:0034…	GO:0001750//photoreceptor outer segment;GO:0001917//photoreceptor inner segment;GO:0005737//cytoplasm;GO:0005737//cytoplasm;GO:0005765//lysosomal membrane;GO:0005829//cytosol;GO:0005856//cytoskeleton;GO:0016324//apical plasma membrane;GO:0016459//myosin complex;GO:0032391//photoreceptor connecting cilium;GO:0032420//stereocilium;GO:0042470//melanosome;GO:0045202//synapse;GO:0045202//synapse;GO:01…	GO:0000146//microfilament motor activity;GO:0003774//cytoskeletal motor activity;GO:0005515//protein binding;GO:0005516//calmodulin binding;GO:0005524//ATP binding;GO:0019904//protein domain specific binding;GO:0030507//spectrin binding;GO:0051015//actin filament binding;GO:0003774//cytoskeletal motor activity;GO:0005515//protein binding;GO:0005524//ATP binding;	-
ENSGALG00000006676	115.96	144.312	87.6084	0.607075	-0.720054	0.0109088	0.629715	Nodiff	10	13417443	13421763	+	1810	RLBP1	GO:0007601;GO:0016918;GO:0005502;GO:0005654;GO:0005813;GO:0005829;GO:0007601;GO:0016918;	K19625	-	S;I	KOG1471;39CE2;3B98E;3D19K;489ZJ;48ZQT;4GNGP	retinaldehyde binding protein 1 [Source:NCBI gene;Acc:415492]	415492	E1C1U1	GO:0007601//visual perception;GO:0007601//visual perception;	GO:0005654//nucleoplasm;GO:0005813//centrosome;GO:0005829//cytosol;	GO:0016918//retinal binding;GO:0005502//11-cis retinal binding;GO:0016918//retinal binding;	-
ENSGALG00000002028	901.278	825.879	976.678	1.18259	0.241953	0.0109834	0.631743	Nodiff	14	15029907	15042718	+	1702	GPRC5B	GO:0004930;GO:0007186;GO:0016021;GO:0004930;GO:0005654;GO:0005730;GO:0005829;GO:0007186;GO:0016021;GO:0030295;GO:0043231;GO:0070062;	K04619	-	S;T	2QWT9;39M52;3BHU8;3D34P;48BFT;48XYW;4GPH4	G protein-coupled receptor class C group 5 member B [Source:NCBI gene;Acc:101747453]	101747453	A0A3Q3B1Z6	GO:0007186//G protein-coupled receptor signaling pathway;GO:0007186//G protein-coupled receptor signaling pathway;	GO:0016021//integral component of membrane;GO:0005654//nucleoplasm;GO:0005730//nucleolus;GO:0005829//cytosol;GO:0016021//integral component of membrane;GO:0043231//intracellular membrane-bounded organelle;GO:0070062//extracellular exosome;	GO:0004930//G protein-coupled receptor activity;GO:0004930//G protein-coupled receptor activity;GO:0030295//protein kinase activator activity;	-
ENSGALG00000015117	103.536	121.004	86.0686	0.711288	-0.491495	0.0111	0.63409	Nodiff	1	83745457	83755386	+	1566	DRD3	GO:0001591;GO:0001591;GO:0001963;GO:0002031;GO:0004930;GO:0004930;GO:0004930;GO:0004930;GO:0004952;GO:0004952;GO:0005886;GO:0005886;GO:0005887;GO:0005887;GO:0005887;GO:0005887;GO:0006874;GO:0007165;GO:0007186;GO:0007186;GO:0007186;GO:0007186;GO:0007191;GO:0007194;GO:0007195;GO:0007195;GO:0007195;GO:0007195;GO:0014059;GO:0016020;GO:0016021;GO:0016021;GO:0016021;GO:0032467;GO:0034776;GO:0042220;GO:…	K04146	-	-	-	dopamine receptor D3 [Source:NCBI gene;Acc:770757]	770757	C5HV40	GO:0001963//synaptic transmission, dopaminergic;GO:0002031//G protein-coupled receptor internalization;GO:0006874//cellular calcium ion homeostasis;GO:0007165//signal transduction;GO:0007186//G protein-coupled receptor signaling pathway;GO:0007186//G protein-coupled receptor signaling pathway;GO:0007186//G protein-coupled receptor signaling pathway;GO:0007186//G protein-coupled receptor signaling…	GO:0005886//plasma membrane;GO:0005886//plasma membrane;GO:0005887//integral component of plasma membrane;GO:0005887//integral component of plasma membrane;GO:0005887//integral component of plasma membrane;GO:0005887//integral component of plasma membrane;GO:0016020//membrane;GO:0016021//integral component of membrane;GO:0016021//integral component of membrane;GO:0016021//integral component of me…	GO:0001591//dopamine neurotransmitter receptor activity, coupled via Gi/Go;GO:0001591//dopamine neurotransmitter receptor activity, coupled via Gi/Go;GO:0004930//G protein-coupled receptor activity;GO:0004930//G protein-coupled receptor activity;GO:0004930//G protein-coupled receptor activity;GO:0004930//G protein-coupled receptor activity;GO:0004952//dopamine neurotransmitter receptor activity;G…	ko04728(Dopaminergic synapse);ko04080(Neuroactive ligand-receptor interaction)
ENSGALG00000041604	1843.18	2112.56	1573.79	0.744971	-0.424745	0.0111726	0.63409	Nodiff	1	50786323	50790986	+	1428	NPTXR	GO:0098962;GO:0098978;	-	-	-	-	neuronal pentraxin receptor [Source:NCBI gene;Acc:427902]	-	-	GO:0098962//regulation of postsynaptic neurotransmitter receptor activity;	GO:0098978//glutamatergic synapse;	-	-
ENSGALG00000033293	1986.77	2146.28	1827.27	0.851366	-0.232148	0.011193	0.63409	Nodiff	21	2384332	2446767	+	2514	ACAP3	GO:0001764;GO:0005096;GO:0005096;GO:0005515;GO:0010975;GO:0030426;	-	-	-	-	ArfGAP with coiled-coil, ankyrin repeat and PH domains 3 [Source:NCBI gene;Acc:419420]	-	-	GO:0001764//neuron migration;GO:0010975//regulation of neuron projection development;	GO:0030426//growth cone;	GO:0005096//GTPase activator activity;GO:0005096//GTPase activator activity;GO:0005515//protein binding;	-
ENSGALG00000003354	37.6496	47.9234	27.3758	0.571241	-0.807828	0.0111932	0.63409	Nodiff	27	7667566	7676495	-	3608	KCNH4	GO:0005216;GO:0005249;GO:0006811;GO:0006813;GO:0016020;GO:0055085;GO:0005216;GO:0005249;GO:0006811;GO:0006813;GO:0016020;GO:0055085;	K04907	-	U;P	KOG0498;38B8A;3BAHT;3CU2J;483KU;48WG2;4GJR5	potassium voltage-gated channel subfamily H member 4 [Source:NCBI gene;Acc:772091]	772091	-	GO:0006811//ion transport;GO:0006813//potassium ion transport;GO:0055085//transmembrane transport;GO:0006811//ion transport;GO:0006813//potassium ion transport;GO:0055085//transmembrane transport;	GO:0016020//membrane;GO:0016020//membrane;	GO:0005216//ion channel activity;GO:0005249//voltage-gated potassium channel activity;GO:0005216//ion channel activity;GO:0005249//voltage-gated potassium channel activity;	-
ENSGALG00000009737	375.027	436.144	313.91	0.719739	-0.474454	0.0112872	0.63409	Nodiff	2	24644607	24650874	+	1769	TAC1	GO:0007217;GO:0005576;GO:0006954;GO:0007204;GO:0007217;GO:0019233;GO:0030424;GO:0043025;GO:0048265;GO:1990090;	K05239	-	S	2S1KJ;3A2VN;3BQHD;3D7BU;48E09;49AX9;4GV8Q	tachykinin precursor 1 [Source:NCBI gene;Acc:420573]	420573	F1NWH4	GO:0007217//tachykinin receptor signaling pathway;GO:0006954//inflammatory response;GO:0007204//positive regulation of cytosolic calcium ion concentration;GO:0007217//tachykinin receptor signaling pathway;GO:0019233//sensory perception of pain;GO:0048265//response to pain;GO:1990090//cellular response to nerve growth factor stimulus;	GO:0005576//extracellular region;GO:0030424//axon;GO:0043025//neuronal cell body;	-	ko04080(Neuroactive ligand-receptor interaction)
ENSGALG00000051144	2639.48	2885.13	2393.83	0.829714	-0.269314	0.0113609	0.63409	Nodiff	30	561818	589313	-	5381	EVI5L	GO:0005096;GO:0043087;GO:0005096;GO:0043087;GO:0005096;GO:0043087;GO:0005096;GO:0005096;GO:0031267;GO:0043087;GO:0043547;GO:1902018;GO:0005096;GO:0043087;	-	-	-	-	ecotropic viral integration site 5 like [Source:NCBI gene;Acc:430998]	-	-	GO:0043087//regulation of GTPase activity;GO:0043087//regulation of GTPase activity;GO:0043087//regulation of GTPase activity;GO:0043087//regulation of GTPase activity;GO:0043547//positive regulation of GTPase activity;GO:1902018//negative regulation of cilium assembly;GO:0043087//regulation of GTPase activity;	-	GO:0005096//GTPase activator activity;GO:0005096//GTPase activator activity;GO:0005096//GTPase activator activity;GO:0005096//GTPase activator activity;GO:0005096//GTPase activator activity;GO:0031267//small GTPase binding;GO:0005096//GTPase activator activity;	-
ENSGALG00000011704	1346.44	1241.13	1451.75	1.1697	0.226141	0.0113692	0.63409	Nodiff	7	27151313	27170993	-	4531	HACD2	GO:0005783;GO:0018812;GO:0019899;GO:0030148;GO:0030497;GO:0042761;GO:0005783;GO:0005789;GO:0006629;GO:0006631;GO:0006633;GO:0009987;GO:0016020;GO:0016021;GO:0016829;GO:0102158;GO:0102158;GO:0102343;GO:0102344;GO:0102345;	K10703	EC:4.2.1.134	I;O	KOG3187;38E6D;3BAFA;3CZWF;4823Z;48ZNB;4GITC	3-hydroxyacyl-CoA dehydratase 2 [Source:NCBI gene;Acc:424251]	424251	Q5ZII7;F6U467	GO:0030148//sphingolipid biosynthetic process;GO:0030497//fatty acid elongation;GO:0042761//very long-chain fatty acid biosynthetic process;GO:0006629//lipid metabolic process;GO:0006631//fatty acid metabolic process;GO:0006633//fatty acid biosynthetic process;GO:0009987//cellular process;	GO:0005783//endoplasmic reticulum;GO:0005783//endoplasmic reticulum;GO:0005789//endoplasmic reticulum membrane;GO:0016020//membrane;GO:0016021//integral component of membrane;	GO:0018812//3-hydroxyacyl-CoA dehydratase activity;GO:0019899//enzyme binding;GO:0016829//lyase activity;GO:0102158//very-long-chain 3-hydroxyacyl-CoA dehydratase activity;GO:0102158//very-long-chain 3-hydroxyacyl-CoA dehydratase activity;GO:0102343//3-hydroxy-arachidoyl-CoA dehydratase activity;GO:0102344//3-hydroxy-behenoyl-CoA dehydratase activity;GO:0102345//3-hydroxy-lignoceroyl-CoA dehydrat…	ko01040(Biosynthesis of unsaturated fatty acids);ko00062(Fatty acid elongation)
ENSGALG00000035254	575.322	627.578	523.065	0.833466	-0.262805	0.0113717	0.63409	Nodiff	KZ626837.1	1770103	1791304	-	5658	-	GO:0004842;GO:0071797;GO:0004842;GO:0071797;	-	-	-	-	E3 ubiquitin-protein ligase RNF31-like [Source:NCBI gene;Acc:107051192]	-	-	-	GO:0071797//LUBAC complex;GO:0071797//LUBAC complex;	GO:0004842//ubiquitin-protein transferase activity;GO:0004842//ubiquitin-protein transferase activity;	-
ENSGALG00000003818	3979.16	4266.62	3691.7	0.865252	-0.208807	0.0113811	0.63409	Nodiff	13	12072751	12112751	-	3786	CYFIP2	GO:0005737;GO:0006915;GO:0030833;GO:0031175;GO:0031267;GO:0045202;GO:0045202;GO:0045862;GO:0048471;GO:0051388;GO:0097202;GO:0097484;GO:0098609;	K05749	-	K;E;L;S;T	KOG3534;38MSV;3BC5Z;3CRVJ;488S6;48Y1P;4GM3G	cytoplasmic FMR1 interacting protein 2 [Source:NCBI gene;Acc:416246]	416246	-	GO:0006915//apoptotic process;GO:0030833//regulation of actin filament polymerization;GO:0031175//neuron projection development;GO:0045862//positive regulation of proteolysis;GO:0051388//positive regulation of neurotrophin TRK receptor signaling pathway;GO:0097202//activation of cysteine-type endopeptidase activity;GO:0097484//dendrite extension;GO:0098609//cell-cell adhesion;	GO:0005737//cytoplasm;GO:0045202//synapse;GO:0045202//synapse;GO:0048471//perinuclear region of cytoplasm;	GO:0031267//small GTPase binding;	ko05132(Salmonella infection);ko05130(Pathogenic Escherichia coli infection);ko04810(Regulation of actin cytoskeleton)
ENSGALG00000037299	346.374	284.668	408.079	1.43352	0.519567	0.0116279	0.639815	Nodiff	Z	44895083	44911110	-	1270	LYRM7	GO:0005759;GO:0031966;GO:0034551;GO:0045333;	K18170	-	-	-	LYR motif containing 7 [Source:NCBI gene;Acc:768932]	768932	A0A1D5PQS9	GO:0034551//mitochondrial respiratory chain complex III assembly;GO:0045333//cellular respiration;	GO:0005759//mitochondrial matrix;GO:0031966//mitochondrial membrane;	-	-
ENSGALG00000005721	489.428	535.569	443.287	0.827693	-0.272832	0.0116328	0.639815	Nodiff	9	5304098	5318084	-	2682	DGKG	GO:0003951;GO:0004143;GO:0004143;GO:0005509;GO:0005829;GO:0006654;GO:0007165;GO:0007205;GO:0008289;GO:0016020;GO:0016301;GO:0035556;GO:0046339;GO:0046486;GO:0046834;GO:0003951;GO:0004143;GO:0005509;GO:0007165;GO:0007205;GO:0016301;GO:0035556;	K00901	EC:2.7.1.107	G;T	KOG1169;38GKA;3BEX2;3CVKA;487AI;48V0T;4GK4Z	diacylglycerol kinase gamma [Source:NCBI gene;Acc:424839]	424839	A0A3Q3AG99	GO:0006654//phosphatidic acid biosynthetic process;GO:0007165//signal transduction;GO:0007205//protein kinase C-activating G protein-coupled receptor signaling pathway;GO:0035556//intracellular signal transduction;GO:0046339//diacylglycerol metabolic process;GO:0046486//glycerolipid metabolic process;GO:0046834//lipid phosphorylation;GO:0007165//signal transduction;GO:0007205//protein kinase C-ac…	GO:0005829//cytosol;GO:0016020//membrane;	GO:0003951//NAD+ kinase activity;GO:0004143//diacylglycerol kinase activity;GO:0004143//diacylglycerol kinase activity;GO:0005509//calcium ion binding;GO:0008289//lipid binding;GO:0016301//kinase activity;GO:0003951//NAD+ kinase activity;GO:0004143//diacylglycerol kinase activity;GO:0005509//calcium ion binding;GO:0016301//kinase activity;	ko05231(Choline metabolism in cancer);ko04361(Axon regeneration);ko04072(Phospholipase D signaling pathway);ko04070(Phosphatidylinositol signaling system);ko00564(Glycerophospholipid metabolism);ko00561(Glycerolipid metabolism)
ENSGALG00000031893	1294.93	1191.48	1398.39	1.17366	0.231009	0.0116352	0.639815	Nodiff	2	49840373	49868304	+	2515	RALA	GO:0001843;GO:0003924;GO:0005525;GO:0005525;GO:0005739;GO:0005886;GO:0005886;GO:0005925;GO:0007165;GO:0007265;GO:0009986;GO:0016020;GO:0017022;GO:0017157;GO:0017157;GO:0019003;GO:0030139;GO:0031532;GO:0031625;GO:0031755;GO:0032154;GO:0051117;GO:0051491;GO:0051665;GO:0051665;GO:0072655;GO:0090141;	K07834	-	-	-	RAS like proto-oncogene A [Source:NCBI gene;Acc:420765]	420765	A0A1D5P1T0	GO:0001843//neural tube closure;GO:0007165//signal transduction;GO:0007265//Ras protein signal transduction;GO:0017157//regulation of exocytosis;GO:0017157//regulation of exocytosis;GO:0031532//actin cytoskeleton reorganization;GO:0051491//positive regulation of filopodium assembly;GO:0051665//membrane raft localization;GO:0051665//membrane raft localization;GO:0072655//establishment of protein l…	GO:0005739//mitochondrion;GO:0005886//plasma membrane;GO:0005886//plasma membrane;GO:0005925//focal adhesion;GO:0009986//cell surface;GO:0016020//membrane;GO:0030139//endocytic vesicle;GO:0032154//cleavage furrow;	GO:0003924//GTPase activity;GO:0005525//GTP binding;GO:0005525//GTP binding;GO:0017022//myosin binding;GO:0019003//GDP binding;GO:0031625//ubiquitin protein ligase binding;GO:0031755//Edg-2 lysophosphatidic acid receptor binding;GO:0051117//ATPase binding;	ko05212(Pancreatic cancer);ko05210(Colorectal cancer);ko05200(Pathways in cancer);ko05132(Salmonella infection);ko04072(Phospholipase D signaling pathway);ko04015(Rap1 signaling pathway);ko04014(Ras signaling pathway)
ENSGALG00000031067	668.741	727.775	609.707	0.837769	-0.255376	0.0116898	0.639815	Nodiff	5	277276	281735	+	3740	TMEM132A	-	-	-	-	-	transmembrane protein 132A [Source:NCBI gene;Acc:107053338]	-	-	-	-	-	-
ENSGALG00000005379	777.271	846.744	707.798	0.835906	-0.258588	0.0117017	0.639815	Nodiff	15	7203165	7224637	+	3336	SGSM1	GO:0005096;GO:0005096;GO:0005829;GO:0030659;GO:0031267;GO:0005096;	K21847	-	E;O;S	KOG1648;38HEA;3BANQ;3CU86;487VJ;493G1;4GS06	small G protein signaling modulator 1 [Source:NCBI gene;Acc:430664]	430664	-	-	GO:0005829//cytosol;GO:0030659//cytoplasmic vesicle membrane;	GO:0005096//GTPase activator activity;GO:0005096//GTPase activator activity;GO:0031267//small GTPase binding;GO:0005096//GTPase activator activity;	-
ENSGALG00000038933	1780.44	2185.49	1375.4	0.629331	-0.66811	0.0117326	0.639815	Nodiff	3	61282801	61286154	-	714	FABP7	GO:0003407;GO:0005737;GO:0007420;GO:0008134;GO:0008289;GO:0008289;GO:0008289;	K08756	-	-	-	fatty acid binding protein 7 [Source:NCBI gene;Acc:396246]	396246	Q05423	GO:0003407//neural retina development;GO:0007420//brain development;	GO:0005737//cytoplasm;	GO:0008134//transcription factor binding;GO:0008289//lipid binding;GO:0008289//lipid binding;GO:0008289//lipid binding;	ko03320(PPAR signaling pathway)
ENSGALG00000005766	12.8947	19.317	6.4724	0.335062	-1.5775	0.0117682	0.639815	Down Regulation	6	18351666	18365667	+	2241	PKD2L1	GO:0001581;GO:0005227;GO:0005261;GO:0005261;GO:0005262;GO:0005262;GO:0005272;GO:0005509;GO:0005509;GO:0005509;GO:0005783;GO:0005886;GO:0005886;GO:0005887;GO:0006812;GO:0007224;GO:0008092;GO:0008324;GO:0009415;GO:0009986;GO:0015269;GO:0016020;GO:0016020;GO:0033040;GO:0034703;GO:0034704;GO:0034704;GO:0035725;GO:0042802;GO:0043231;GO:0043235;GO:0050912;GO:0050915;GO:0051262;GO:0051289;GO:0051371;GO:…	K04990	-	T;E;P	KOG3599;38E7E;3BG4C;3CUR7;482V3;497UH;4GKI3	polycystin 2 like 1, transient receptor potential cation channel [Source:NCBI gene;Acc:428954]	428954	-	GO:0001581//detection of chemical stimulus involved in sensory perception of sour taste;GO:0006812//cation transport;GO:0007224//smoothened signaling pathway;GO:0009415//response to water;GO:0035725//sodium ion transmembrane transport;GO:0050912//detection of chemical stimulus involved in sensory perception of taste;GO:0050915//sensory perception of sour taste;GO:0051262//protein tetramerization;…	GO:0005783//endoplasmic reticulum;GO:0005886//plasma membrane;GO:0005886//plasma membrane;GO:0005887//integral component of plasma membrane;GO:0009986//cell surface;GO:0016020//membrane;GO:0016020//membrane;GO:0034703//cation channel complex;GO:0034704//calcium channel complex;GO:0034704//calcium channel complex;GO:0043231//intracellular membrane-bounded organelle;GO:0043235//receptor complex;GO:…	GO:0005227//calcium activated cation channel activity;GO:0005261//cation channel activity;GO:0005261//cation channel activity;GO:0005262//calcium channel activity;GO:0005262//calcium channel activity;GO:0005272//sodium channel activity;GO:0005509//calcium ion binding;GO:0005509//calcium ion binding;GO:0005509//calcium ion binding;GO:0008092//cytoskeletal protein binding;GO:0008324//cation transme…	ko04742(Taste transduction)
ENSGALG00000004282	933.334	856.111	1010.56	1.1804	0.239281	0.0118287	0.639815	Nodiff	23	5903355	5910667	+	2864	RCAN3	GO:0003676;GO:0003676;GO:0005634;GO:0005737;GO:0008597;GO:0019722;GO:0019722;GO:0019722;GO:0019902;GO:0031013;GO:0050790;	K17905	-	T;S	KOG4019;39UDR;3BCUE;3E48P;48QXN;49MHK;4GR70	RCAN family member 3 [Source:NCBI gene;Acc:419698]	419698	Q5ZJV6	GO:0019722//calcium-mediated signaling;GO:0019722//calcium-mediated signaling;GO:0019722//calcium-mediated signaling;GO:0050790//regulation of catalytic activity;	GO:0005634//nucleus;GO:0005737//cytoplasm;	GO:0003676//nucleic acid binding;GO:0003676//nucleic acid binding;GO:0008597//calcium-dependent protein serine/threonine phosphatase regulator activity;GO:0019902//phosphatase binding;GO:0031013//troponin I binding;	-
ENSGALG00000035930	1557.55	1437	1678.1	1.16779	0.223775	0.0118778	0.639815	Nodiff	20	6735552	6830610	+	2483	PHACTR3	GO:0003779;GO:0005654;GO:0008157;GO:0019888;GO:0003779;GO:0008157;GO:0019888;	-	-	-	-	phosphatase and actin regulator 3 [Source:NCBI gene;Acc:770781]	-	-	-	GO:0005654//nucleoplasm;	GO:0003779//actin binding;GO:0008157//protein phosphatase 1 binding;GO:0019888//protein phosphatase regulator activity;GO:0003779//actin binding;GO:0008157//protein phosphatase 1 binding;GO:0019888//protein phosphatase regulator activity;	-
ENSGALG00000003114	134.968	156.201	113.734	0.728129	-0.457733	0.011884	0.639815	Nodiff	18	6187592	6189553	+	1520	NOG	GO:0001649;GO:0005576;GO:0005615;GO:0009953;GO:0030514;GO:0030514;GO:0030514;GO:0045596;GO:0045596;GO:0048523;GO:0051216;GO:1902747;	K04658	-	T;S	KOG4485;38WPU;3BDDD;3CSMB;47ZGH;4981N;4GR4C	noggin [Source:HGNC Symbol;Acc:HGNC:7866]	373912	O93525	GO:0001649//osteoblast differentiation;GO:0009953//dorsal/ventral pattern formation;GO:0030514//negative regulation of BMP signaling pathway;GO:0030514//negative regulation of BMP signaling pathway;GO:0030514//negative regulation of BMP signaling pathway;GO:0045596//negative regulation of cell differentiation;GO:0045596//negative regulation of cell differentiation;GO:0048523//negative regulation …	GO:0005576//extracellular region;GO:0005615//extracellular space;	-	ko04350(TGF-beta signaling pathway)
ENSGALG00000049853	6331.46	5895.91	6767.01	1.14775	0.198806	0.0120049	0.640477	Nodiff	1	77579970	77584568	-	2625	VAMP1	GO:0016021;GO:0016192;GO:0035579;GO:0070821;	-	-	-	-	vesicle-associated membrane protein 1 (synaptobrevin 1) [Source:NCBI gene;Acc:418273]	-	-	GO:0016192//vesicle-mediated transport;	GO:0016021//integral component of membrane;GO:0035579//specific granule membrane;GO:0070821//tertiary granule membrane;	-	-
ENSGALG00000051458	24.0604	15.7892	32.3316	2.04771	1.03401	0.0120122	0.640477	Up Regulation	33	6319041	6321636	-	442	-	-	-	-	-	-	-	-	-	-	-	-	-
ENSGALG00000034701	24.1347	31.7922	16.4771	0.518276	-0.948208	0.0120164	0.640477	Nodiff	33	6867525	6869862	-	336	-	GO:0016491;GO:0016491;	-	-	-	-	-	-	-	-	-	GO:0016491//oxidoreductase activity;GO:0016491//oxidoreductase activity;	-
ENSGALG00000035282	71.6338	57.5024	85.7652	1.49151	0.576771	0.0120846	0.641968	Nodiff	5	13971786	13980128	+	1182	IGF2	GO:0000122;GO:0001649;GO:0001934;GO:0005158;GO:0005159;GO:0005159;GO:0005159;GO:0005178;GO:0005178;GO:0005179;GO:0005179;GO:0005576;GO:0005576;GO:0005576;GO:0005615;GO:0005615;GO:0005615;GO:0005615;GO:0005615;GO:0008083;GO:0008083;GO:0008083;GO:0008083;GO:0008083;GO:0008284;GO:0008284;GO:0009887;GO:0031017;GO:0031056;GO:0038028;GO:0040018;GO:0042104;GO:0042104;GO:0043085;GO:0043410;GO:0043410;GO:…	K13769	-	-	-	insulin like growth factor 2 [Source:NCBI gene;Acc:395097]	395097	P33717	GO:0000122//negative regulation of transcription by RNA polymerase II;GO:0001649//osteoblast differentiation;GO:0001934//positive regulation of protein phosphorylation;GO:0008284//positive regulation of cell population proliferation;GO:0008284//positive regulation of cell population proliferation;GO:0009887//animal organ morphogenesis;GO:0031017//exocrine pancreas development;GO:0031056//regulati…	GO:0005576//extracellular region;GO:0005576//extracellular region;GO:0005576//extracellular region;GO:0005615//extracellular space;GO:0005615//extracellular space;GO:0005615//extracellular space;GO:0005615//extracellular space;GO:0005615//extracellular space;	GO:0005158//insulin receptor binding;GO:0005159//insulin-like growth factor receptor binding;GO:0005159//insulin-like growth factor receptor binding;GO:0005159//insulin-like growth factor receptor binding;GO:0005178//integrin binding;GO:0005178//integrin binding;GO:0005179//hormone activity;GO:0005179//hormone activity;GO:0008083//growth factor activity;GO:0008083//growth factor activity;GO:00080…	ko05225(Hepatocellular carcinoma);ko05205(Proteoglycans in cancer);ko05200(Pathways in cancer);ko04151(PI3K-Akt signaling pathway);ko04014(Ras signaling pathway);ko04010(MAPK signaling pathway)
ENSGALG00000022896	57.9658	27.1291	88.8025	3.27333	1.71076	0.0121529	0.642208	Up Regulation	2	86044965	86053142	-	2411	IRX4	GO:0000978;GO:0000981;GO:0000981;GO:0000981;GO:0003677;GO:0003677;GO:0003677;GO:0005634;GO:0005634;GO:0005634;GO:0005634;GO:0006355;GO:0006355;GO:0006357;GO:0007507;GO:0030182;GO:0048468;	K24889	-	K	KOG0773;39VGJ;3BJAP;3CZN6;48B55;495E2;4GMNM	iroquois homeobox 4 [Source:NCBI gene;Acc:373974]	373974	Q9YGS0	GO:0006355//regulation of transcription, DNA-templated;GO:0006355//regulation of transcription, DNA-templated;GO:0006357//regulation of transcription by RNA polymerase II;GO:0007507//heart development;GO:0030182//neuron differentiation;GO:0048468//cell development;	GO:0005634//nucleus;GO:0005634//nucleus;GO:0005634//nucleus;GO:0005634//nucleus;	GO:0000978//RNA polymerase II cis-regulatory region sequence-specific DNA binding;GO:0000981//DNA-binding transcription factor activity, RNA polymerase II-specific;GO:0000981//DNA-binding transcription factor activity, RNA polymerase II-specific;GO:0000981//DNA-binding transcription factor activity, RNA polymerase II-specific;GO:0003677//DNA binding;GO:0003677//DNA binding;GO:0003677//DNA binding;	-
ENSGALG00000048716	840.299	767.439	913.159	1.18988	0.250814	0.0121694	0.642208	Nodiff	1	155810119	155824758	+	3244	FBXL3	GO:0004842;GO:0004842;GO:0005515;GO:0005634;GO:0005829;GO:0016567;GO:0016604;GO:0019005;GO:0031146;GO:0031146;GO:0031648;GO:0042752;GO:0042752;GO:0043153;GO:0043161;	-	-	-	-	F-box and leucine rich repeat protein 3 [Source:NCBI gene;Acc:428048]	-	-	GO:0016567//protein ubiquitination;GO:0031146//SCF-dependent proteasomal ubiquitin-dependent protein catabolic process;GO:0031146//SCF-dependent proteasomal ubiquitin-dependent protein catabolic process;GO:0031648//protein destabilization;GO:0042752//regulation of circadian rhythm;GO:0042752//regulation of circadian rhythm;GO:0043153//entrainment of circadian clock by photoperiod;GO:0043161//prot…	GO:0005634//nucleus;GO:0005829//cytosol;GO:0016604//nuclear body;GO:0019005//SCF ubiquitin ligase complex;	GO:0004842//ubiquitin-protein transferase activity;GO:0004842//ubiquitin-protein transferase activity;GO:0005515//protein binding;	-
ENSGALG00000042767	118.961	99.0359	138.887	1.40239	0.487888	0.0123061	0.647285	Nodiff	30	1128565	1137195	-	1614	LPAR2	GO:0004930;GO:0007186;GO:0009986;GO:0016021;GO:0030139;GO:0070915;GO:0004930;GO:0007186;GO:0016021;GO:0070915;	K04291	-	-	-	lysophosphatidic acid receptor 2 [Source:NCBI gene;Acc:426086]	426086	A0A1D5PSL7	GO:0007186//G protein-coupled receptor signaling pathway;GO:0007186//G protein-coupled receptor signaling pathway;	GO:0009986//cell surface;GO:0016021//integral component of membrane;GO:0030139//endocytic vesicle;GO:0016021//integral component of membrane;	GO:0004930//G protein-coupled receptor activity;GO:0070915//lysophosphatidic acid receptor activity;GO:0004930//G protein-coupled receptor activity;GO:0070915//lysophosphatidic acid receptor activity;	ko05200(Pathways in cancer);ko05130(Pathogenic Escherichia coli infection);ko04810(Regulation of actin cytoskeleton);ko04151(PI3K-Akt signaling pathway);ko04080(Neuroactive ligand-receptor interaction);ko04072(Phospholipase D signaling pathway);ko04015(Rap1 signaling pathway)
ENSGALG00000050281	14.867	8.49784	21.2362	2.49901	1.32135	0.0123677	0.648393	Up Regulation	13	887080	899460	-	2259	-	GO:0005509;GO:0005509;GO:0005509;GO:0005886;GO:0005886;GO:0005887;GO:0007155;GO:0007155;GO:0007155;GO:0007156;GO:0007156;GO:0016020;GO:0016020;GO:0016020;GO:0016021;	-	-	-	-	-	-	-	GO:0007155//cell adhesion;GO:0007155//cell adhesion;GO:0007155//cell adhesion;GO:0007156//homophilic cell adhesion via plasma membrane adhesion molecules;GO:0007156//homophilic cell adhesion via plasma membrane adhesion molecules;	GO:0005886//plasma membrane;GO:0005886//plasma membrane;GO:0005887//integral component of plasma membrane;GO:0016020//membrane;GO:0016020//membrane;GO:0016020//membrane;GO:0016021//integral component of membrane;	GO:0005509//calcium ion binding;GO:0005509//calcium ion binding;GO:0005509//calcium ion binding;	-
ENSGALG00000008815	76.1897	95.6902	56.6892	0.592424	-0.755297	0.0124623	0.651215	Nodiff	3	15421291	15430454	+	3758	LRRN4	GO:0005515;GO:0005887;GO:0007616;GO:0008542;	K24493	-	T;U	KOG0619;39EP6;3BC4G;3D44T;489MM;495V4;4GRY0	leucine rich repeat neuronal 4 [Source:NCBI gene;Acc:427686]	427686	F1NPG4	GO:0007616//long-term memory;GO:0008542//visual learning;	GO:0005887//integral component of plasma membrane;	GO:0005515//protein binding;	-
ENSGALG00000048165	2228.16	2388.64	2067.68	0.86563	-0.208178	0.0125369	0.652981	Nodiff	33	3417520	3420686	-	1017	-	GO:0003924;GO:0005525;	-	-	-	-	ADP ribosylation factor 3 [Source:NCBI gene;Acc:107049507]	-	-	-	-	GO:0003924//GTPase activity;GO:0005525//GTP binding;	-
ENSGALG00000014189	4291.94	3945.9	4637.98	1.17539	0.233143	0.0126695	0.657745	Nodiff	1	69011403	69044852	-	2788	SULT4A1	GO:0005739;GO:0005829;GO:0006790;GO:0008146;GO:0008146;GO:0042802;GO:0008146;	K11823	EC:2.8.2.-	S	KOG1584;39SZV;3BHZD;3CX2S;484UZ;48ZF9;4GTPY	sulfotransferase family 4A member 1 [Source:NCBI gene;Acc:418232]	418232	-	GO:0006790//sulfur compound metabolic process;	GO:0005739//mitochondrion;GO:0005829//cytosol;	GO:0008146//sulfotransferase activity;GO:0008146//sulfotransferase activity;GO:0042802//identical protein binding;GO:0008146//sulfotransferase activity;	-
ENSGALG00000032028	378.405	421.956	334.855	0.793578	-0.333556	0.0128212	0.658914	Nodiff	1	173838414	173854684	-	2876	SERTM1	GO:0043231;	-	-	-	-	serine rich and transmembrane domain containing 1 [Source:NCBI gene;Acc:418900]	418900	A0A1D5P8G4	-	GO:0043231//intracellular membrane-bounded organelle;	-	-
ENSGALG00000009595	829.465	758.529	900.402	1.18704	0.247364	0.0128509	0.658914	Nodiff	1	30203889	30222692	-	4382	TWF1	GO:0003779;GO:0003779;GO:0003785;GO:0004713;GO:0005524;GO:0005546;GO:0005730;GO:0005829;GO:0005911;GO:0010613;GO:0015629;GO:0030016;GO:0030175;GO:0030837;GO:0030837;GO:0032587;GO:0042989;GO:0043538;GO:0044877;GO:0048471;GO:0051016;	K08870	-	-	-	twinfilin actin binding protein 1 [Source:NCBI gene;Acc:417797]	417797	Q5ZLN3	GO:0010613//positive regulation of cardiac muscle hypertrophy;GO:0030837//negative regulation of actin filament polymerization;GO:0030837//negative regulation of actin filament polymerization;GO:0042989//sequestering of actin monomers;GO:0043538//regulation of actin phosphorylation;GO:0051016//barbed-end actin filament capping;	GO:0005730//nucleolus;GO:0005829//cytosol;GO:0005911//cell-cell junction;GO:0015629//actin cytoskeleton;GO:0030016//myofibril;GO:0030175//filopodium;GO:0032587//ruffle membrane;GO:0048471//perinuclear region of cytoplasm;	GO:0003779//actin binding;GO:0003779//actin binding;GO:0003785//actin monomer binding;GO:0004713//protein tyrosine kinase activity;GO:0005524//ATP binding;GO:0005546//phosphatidylinositol-4,5-bisphosphate binding;GO:0044877//protein-containing complex binding;	-
ENSGALG00000003841	833.271	902.784	763.758	0.846004	-0.241264	0.0128668	0.658914	Nodiff	4	1834265	1850149	-	7843	-	GO:0003951;GO:0004143;GO:0005515;GO:0007165;GO:0007205;GO:0016301;GO:0035556;	K00901	EC:2.7.1.107	T	KOG1170;38FXR;3BCPJ;3CUWN;48CBU;48X02;4GMAI	diacylglycerol kinase kappa [Source:NCBI gene;Acc:422129]	422129	-	GO:0007165//signal transduction;GO:0007205//protein kinase C-activating G protein-coupled receptor signaling pathway;GO:0035556//intracellular signal transduction;	-	GO:0003951//NAD+ kinase activity;GO:0004143//diacylglycerol kinase activity;GO:0005515//protein binding;GO:0016301//kinase activity;	ko05231(Choline metabolism in cancer);ko04361(Axon regeneration);ko04072(Phospholipase D signaling pathway);ko04070(Phosphatidylinositol signaling system);ko00564(Glycerophospholipid metabolism);ko00561(Glycerolipid metabolism)
ENSGALG00000008734	3726.04	3983.73	3468.35	0.870628	-0.199871	0.0129294	0.658914	Nodiff	3	12111551	12286838	-	2351	PCSK2	GO:0004252;GO:0004252;GO:0005615;GO:0005654;GO:0006508;GO:0006508;GO:0008236;GO:0016020;GO:0016486;GO:0030070;GO:0043231;GO:0004252;GO:0006508;GO:0008236;GO:0004252;GO:0006508;GO:0008236;	K01360	EC:3.4.21.94	O	KOG3526;39MBC;3BBNK;3CRUR;484G4;493X0;4GM74	proprotein convertase subtilisin/kexin type 2 [Source:NCBI gene;Acc:395136]	395136	A0A3Q2TYP3	GO:0006508//proteolysis;GO:0006508//proteolysis;GO:0016486//peptide hormone processing;GO:0030070//insulin processing;GO:0006508//proteolysis;GO:0006508//proteolysis;	GO:0005615//extracellular space;GO:0005654//nucleoplasm;GO:0016020//membrane;GO:0043231//intracellular membrane-bounded organelle;	GO:0004252//serine-type endopeptidase activity;GO:0004252//serine-type endopeptidase activity;GO:0008236//serine-type peptidase activity;GO:0004252//serine-type endopeptidase activity;GO:0008236//serine-type peptidase activity;GO:0004252//serine-type endopeptidase activity;GO:0008236//serine-type peptidase activity;	-
ENSGALG00000041470	201.211	175.68	226.742	1.29065	0.368101	0.0129656	0.658914	Nodiff	1	71237629	71271740	+	2177	PPARA	GO:0000122;GO:0000978;GO:0001227;GO:0003677;GO:0003677;GO:0003677;GO:0003700;GO:0003700;GO:0003700;GO:0004879;GO:0004879;GO:0004879;GO:0005634;GO:0005634;GO:0005634;GO:0006355;GO:0006355;GO:0006357;GO:0006631;GO:0007154;GO:0008270;GO:0008270;GO:0009755;GO:0010887;GO:0019216;GO:0030154;GO:0030522;GO:0033993;GO:0043401;GO:0043565;GO:0043565;GO:0045923;GO:0045944;GO:0046872;GO:0050728;GO:0051716;GO:…	K07294	-	-	-	peroxisome proliferator activated receptor alpha [Source:NCBI gene;Acc:374120]	374120	Q9I8W4	GO:0000122//negative regulation of transcription by RNA polymerase II;GO:0006355//regulation of transcription, DNA-templated;GO:0006355//regulation of transcription, DNA-templated;GO:0006357//regulation of transcription by RNA polymerase II;GO:0006631//fatty acid metabolic process;GO:0007154//cell communication;GO:0009755//hormone-mediated signaling pathway;GO:0010887//negative regulation of chol…	GO:0005634//nucleus;GO:0005634//nucleus;GO:0005634//nucleus;GO:0005634//nucleus;GO:0005634//nucleus;GO:0005634//nucleus;GO:0005634//nucleus;GO:0005654//nucleoplasm;GO:0005634//nucleus;GO:0005634//nucleus;GO:0005634//nucleus;	GO:0000978//RNA polymerase II cis-regulatory region sequence-specific DNA binding;GO:0001227//DNA-binding transcription repressor activity, RNA polymerase II-specific;GO:0003677//DNA binding;GO:0003677//DNA binding;GO:0003677//DNA binding;GO:0003700//DNA-binding transcription factor activity;GO:0003700//DNA-binding transcription factor activity;GO:0003700//DNA-binding transcription factor activit…	ko05415(Diabetic cardiomyopathy);ko05207(Chemical carcinogenesis - receptor activation);ko05160(Hepatitis C);ko04936(Alcoholic liver disease);ko04932(Non-alcoholic fatty liver disease);ko04931(Insulin resistance);ko04922(Glucagon signaling pathway);ko04920(Adipocytokine signaling pathway);ko04024(cAMP signaling pathway);ko03320(PPAR signaling pathway)
ENSGALG00000040730	69.1308	55.1755	83.0861	1.50585	0.59058	0.0129905	0.658914	Nodiff	8	5512946	5535929	+	1757	RXRG	GO:0003677;GO:0003700;GO:0003707;GO:0004879;GO:0005634;GO:0006355;GO:0008270;GO:0043565;GO:0043565;GO:0045944;GO:0048384;GO:1990837;GO:0003677;GO:0003700;GO:0003707;GO:0005634;GO:0006355;GO:0008270;GO:0043565;	K08526	-	-	-	retinoid X receptor gamma [Source:NCBI gene;Acc:396231]	396231	P28701	GO:0006355//regulation of transcription, DNA-templated;GO:0045944//positive regulation of transcription by RNA polymerase II;GO:0048384//retinoic acid receptor signaling pathway;GO:0006355//regulation of transcription, DNA-templated;	GO:0005634//nucleus;GO:0005634//nucleus;	GO:0003677//DNA binding;GO:0003700//DNA-binding transcription factor activity;GO:0003707//steroid hormone receptor activity;GO:0004879//nuclear receptor activity;GO:0008270//zinc ion binding;GO:0043565//sequence-specific DNA binding;GO:0043565//sequence-specific DNA binding;GO:1990837//sequence-specific double-stranded DNA binding;GO:0003677//DNA binding;GO:0003700//DNA-binding transcription fact…	ko05417(Lipid and atherosclerosis);ko05226(Gastric cancer);ko05223(Non-small cell lung cancer);ko05222(Small cell lung cancer);ko05216(Thyroid cancer);ko05207(Chemical carcinogenesis - receptor activation);ko05202(Transcriptional misregulation in cancer);ko05200(Pathways in cancer);ko04928(Parathyroid hormone synthesis, secretion and action);ko04920(Adipocytokine signaling pathway);ko04919(Thyroi…
ENSGALG00000042199	4566.3	5131.98	4000.63	0.77955	-0.359287	0.0130644	0.658914	Nodiff	20	10577212	10600763	+	4488	SLC12A5	GO:0005886;GO:0005887;GO:0006811;GO:0006811;GO:0006821;GO:0006873;GO:0006971;GO:0007268;GO:0007268;GO:0007612;GO:0009410;GO:0015108;GO:0015377;GO:0015379;GO:0015379;GO:0015379;GO:0016020;GO:0016021;GO:0016021;GO:0022857;GO:0030644;GO:0035264;GO:0040040;GO:0043005;GO:0043025;GO:0043025;GO:0055085;GO:0060996;GO:0071944;GO:0071944;GO:1902476;GO:0005887;GO:0006811;GO:0007268;GO:0015377;GO:0015379;GO:…	K23967	-	-	-	solute carrier family 12 (potassium/chloride transporter), member 5 [Source:NCBI gene;Acc:777252]	777252	-	GO:0006811//ion transport;GO:0006811//ion transport;GO:0006821//chloride transport;GO:0006873//cellular ion homeostasis;GO:0006971//hypotonic response;GO:0007268//chemical synaptic transmission;GO:0007268//chemical synaptic transmission;GO:0007612//learning;GO:0009410//response to xenobiotic stimulus;GO:0030644//cellular chloride ion homeostasis;GO:0035264//multicellular organism growth;GO:004004…	GO:0005886//plasma membrane;GO:0005887//integral component of plasma membrane;GO:0016020//membrane;GO:0016021//integral component of membrane;GO:0016021//integral component of membrane;GO:0043005//neuron projection;GO:0043025//neuronal cell body;GO:0043025//neuronal cell body;GO:0071944//cell periphery;GO:0071944//cell periphery;GO:0005887//integral component of plasma membrane;GO:0016020//membra…	GO:0015108//chloride transmembrane transporter activity;GO:0015377//cation:chloride symporter activity;GO:0015379//potassium:chloride symporter activity;GO:0015379//potassium:chloride symporter activity;GO:0015379//potassium:chloride symporter activity;GO:0022857//transmembrane transporter activity;GO:0015377//cation:chloride symporter activity;GO:0015379//potassium:chloride symporter activity;GO…	ko04727(GABAergic synapse)
ENSGALG00000037067	1229.54	1132.93	1326.14	1.17054	0.227169	0.0131184	0.658914	Nodiff	2	132199298	132219771	-	1529	EIF3E	GO:0003743;GO:0005737;GO:0005852;GO:0000184;GO:0003743;GO:0003743;GO:0003743;GO:0005634;GO:0005737;GO:0005737;GO:0005829;GO:0005852;GO:0005852;GO:0005852;GO:0006413;GO:0006413;GO:0016605;GO:0045727;GO:0047485;GO:1902416;	K03250	-	-	-	eukaryotic translation initiation factor 3 subunit E [Source:NCBI gene;Acc:420272]	420272	Q5ZLA5	GO:0000184//nuclear-transcribed mRNA catabolic process, nonsense-mediated decay;GO:0006413//translational initiation;GO:0006413//translational initiation;GO:0045727//positive regulation of translation;GO:1902416//positive regulation of mRNA binding;	GO:0005737//cytoplasm;GO:0005852//eukaryotic translation initiation factor 3 complex;GO:0005634//nucleus;GO:0005737//cytoplasm;GO:0005737//cytoplasm;GO:0005829//cytosol;GO:0005852//eukaryotic translation initiation factor 3 complex;GO:0005852//eukaryotic translation initiation factor 3 complex;GO:0005852//eukaryotic translation initiation factor 3 complex;GO:0016605//PML body;	GO:0003743//translation initiation factor activity;GO:0003743//translation initiation factor activity;GO:0003743//translation initiation factor activity;GO:0003743//translation initiation factor activity;GO:0047485//protein N-terminus binding;	ko05160(Hepatitis C)
ENSGALG00000041687	3738.76	4085.28	3392.24	0.830357	-0.268197	0.0131453	0.658914	Nodiff	1	49494257	49513013	-	4472	SREBF2	GO:0000122;GO:0000976;GO:0000978;GO:0001227;GO:0003677;GO:0003700;GO:0005634;GO:0005634;GO:0005654;GO:0005737;GO:0005737;GO:0005783;GO:0006355;GO:0008022;GO:0009267;GO:0010886;GO:0016020;GO:0032933;GO:0032937;GO:0042632;GO:0043231;GO:0045944;GO:0045944;GO:0046983;GO:0070888;GO:0071404;GO:0090370;GO:1902895;GO:1990837;GO:0046983;	K09107	-	-	-	sterol regulatory element binding transcription factor 2 [Source:NCBI gene;Acc:395304]	395304	A0A1D5PX69	GO:0000122//negative regulation of transcription by RNA polymerase II;GO:0006355//regulation of transcription, DNA-templated;GO:0009267//cellular response to starvation;GO:0010886//positive regulation of cholesterol storage;GO:0032933//SREBP signaling pathway;GO:0042632//cholesterol homeostasis;GO:0045944//positive regulation of transcription by RNA polymerase II;GO:0045944//positive regulation o…	GO:0005634//nucleus;GO:0005634//nucleus;GO:0005654//nucleoplasm;GO:0005737//cytoplasm;GO:0005737//cytoplasm;GO:0005783//endoplasmic reticulum;GO:0016020//membrane;GO:0032937//SREBP-SCAP-Insig complex;GO:0043231//intracellular membrane-bounded organelle;	GO:0000976//transcription cis-regulatory region binding;GO:0000978//RNA polymerase II cis-regulatory region sequence-specific DNA binding;GO:0001227//DNA-binding transcription repressor activity, RNA polymerase II-specific;GO:0003677//DNA binding;GO:0003700//DNA-binding transcription factor activity;GO:0008022//protein C-terminus binding;GO:0046983//protein dimerization activity;GO:0070888//E-box…	-
ENSGALG00000008855	2138.07	1982.12	2294.03	1.15736	0.21084	0.0131982	0.658914	Nodiff	3	10164257	10188294	+	3584	UGP2	GO:0003983;GO:0003983;GO:0005978;GO:0006011;GO:0006011;GO:0007420;GO:0042802;GO:0070569;GO:0003983;GO:0006011;GO:0070569;	K00963	EC:2.7.7.9	-	-	UDP-glucose pyrophosphorylase 2 [Source:NCBI gene;Acc:373900]	373900	A0A1D5P0A1;Q5ZKW4	GO:0005978//glycogen biosynthetic process;GO:0006011//UDP-glucose metabolic process;GO:0006011//UDP-glucose metabolic process;GO:0007420//brain development;GO:0006011//UDP-glucose metabolic process;	-	GO:0003983//UTP:glucose-1-phosphate uridylyltransferase activity;GO:0003983//UTP:glucose-1-phosphate uridylyltransferase activity;GO:0042802//identical protein binding;GO:0070569//uridylyltransferase activity;GO:0003983//UTP:glucose-1-phosphate uridylyltransferase activity;GO:0070569//uridylyltransferase activity;	ko00541(O-Antigen nucleotide sugar biosynthesis);ko00520(Amino sugar and nucleotide sugar metabolism);ko00500(Starch and sucrose metabolism);ko00052(Galactose metabolism);ko00040(Pentose and glucuronate interconversions)
ENSGALG00000009572	155.716	178.521	132.911	0.744511	-0.425634	0.0132628	0.658914	Nodiff	1	30046660	30129302	-	5721	ADAMTS20	GO:0004175;GO:0004222;GO:0004222;GO:0004222;GO:0004222;GO:0005576;GO:0005615;GO:0006508;GO:0006508;GO:0006508;GO:0006508;GO:0008233;GO:0008237;GO:0008237;GO:0008237;GO:0008270;GO:0008270;GO:0009967;GO:0016787;GO:0030198;GO:0030198;GO:0031012;GO:0043066;GO:0045636;GO:0046872;GO:0048070;	K09609	EC:3.4.24.-	-	-	ADAM metallopeptidase with thrombospondin type 1 motif 20 [Source:NCBI gene;Acc:417794]	417794	A0A1D5P8Z5	GO:0006508//proteolysis;GO:0006508//proteolysis;GO:0006508//proteolysis;GO:0006508//proteolysis;GO:0009967//positive regulation of signal transduction;GO:0030198//extracellular matrix organization;GO:0030198//extracellular matrix organization;GO:0043066//negative regulation of apoptotic process;GO:0045636//positive regulation of melanocyte differentiation;GO:0048070//regulation of developmental p…	GO:0005576//extracellular region;GO:0005615//extracellular space;GO:0031012//extracellular matrix;	GO:0004175//endopeptidase activity;GO:0004222//metalloendopeptidase activity;GO:0004222//metalloendopeptidase activity;GO:0004222//metalloendopeptidase activity;GO:0004222//metalloendopeptidase activity;GO:0008233//peptidase activity;GO:0008237//metallopeptidase activity;GO:0008237//metallopeptidase activity;GO:0008237//metallopeptidase activity;GO:0008270//zinc ion binding;GO:0008270//zinc ion b…	-
ENSGALG00000026215	344.248	383.66	304.836	0.794547	-0.331795	0.0132815	0.658914	Nodiff	5	28176306	28178384	+	2079	-	-	-	-	S	2QVGE;38PGV;3BKEF;3D1CD;48151;4981G;4GI2A	coiled-coil domain containing 177 [Source:NCBI gene;Acc:101748318]	-	-	-	-	-	-
ENSGALG00000032184	1276.89	1382.85	1170.93	0.846751	-0.239991	0.0132908	0.658914	Nodiff	2	900452	906269	+	3439	CSPG5	GO:0007399;GO:0007399;	K08116	-	-	-	chondroitin sulfate proteoglycan 5 [Source:NCBI gene;Acc:395466]	395466	Q9DF69	GO:0007399//nervous system development;GO:0007399//nervous system development;	-	-	-
ENSGALG00000032143	82.0419	97.6208	66.4631	0.680829	-0.554636	0.0133076	0.658914	Nodiff	11	16909051	16934252	+	2352	CRISPLD2	GO:0005576;GO:0005539;GO:0005576;GO:0008201;GO:0030133;GO:0030198;GO:0031012;GO:0060325;	K24243	-	-	-	cysteine rich secretory protein LCCL domain containing 2 [Source:NCBI gene;Acc:415818]	415818	-	GO:0030198//extracellular matrix organization;GO:0060325//face morphogenesis;	GO:0005576//extracellular region;GO:0005576//extracellular region;GO:0030133//transport vesicle;GO:0031012//extracellular matrix;	GO:0005539//glycosaminoglycan binding;GO:0008201//heparin binding;	-
ENSGALG00000017332	471.004	517.517	424.491	0.820246	-0.285871	0.0133101	0.658914	Nodiff	1	196850267	196856462	+	1910	KLHL35	GO:0005515;	K10461	-	L;K;T	KOG4441;39S8Z;3BAA4;3CU4E;481B9;4924D;4GJN7	kelch like family member 35 [Source:NCBI gene;Acc:101747275]	101747275	-	-	-	GO:0005515//protein binding;	-
ENSGALG00000008421	251.153	281.322	220.985	0.785525	-0.348271	0.0134155	0.659837	Nodiff	5	24156326	24162006	+	1888	PEX16	GO:0005777;GO:0005778;GO:0005779;GO:0005783;GO:0005789;GO:0006625;GO:0007031;GO:0008022;GO:0016557;GO:0016558;GO:0022615;GO:0032581;GO:0045046;GO:0106101;	K13335	-	J;U	KOG4546;38GNP;3BBTI;3D2DB;47ZG9;48ZZA;4GQWR	peroxisomal biogenesis factor 16 [Source:NCBI gene;Acc:423201]	423201	-	GO:0006625//protein targeting to peroxisome;GO:0007031//peroxisome organization;GO:0016557//peroxisome membrane biogenesis;GO:0016558//protein import into peroxisome matrix;GO:0022615//protein to membrane docking;GO:0032581//ER-dependent peroxisome organization;GO:0045046//protein import into peroxisome membrane;GO:0106101//ER-dependent peroxisome localization;	GO:0005777//peroxisome;GO:0005778//peroxisomal membrane;GO:0005779//integral component of peroxisomal membrane;GO:0005783//endoplasmic reticulum;GO:0005789//endoplasmic reticulum membrane;	GO:0008022//protein C-terminus binding;	ko04146(Peroxisome)
ENSGALG00000010858	75.9054	90.5406	61.2701	0.676715	-0.563381	0.0134562	0.659837	Nodiff	7	18736749	18812213	+	9724	LRP2	GO:0001822;GO:0001843;GO:0003139;GO:0003148;GO:0003223;GO:0003281;GO:0005509;GO:0005509;GO:0005515;GO:0005768;GO:0005783;GO:0005794;GO:0005903;GO:0005905;GO:0006766;GO:0006898;GO:0006898;GO:0007507;GO:0007605;GO:0008283;GO:0008584;GO:0009897;GO:0015031;GO:0015031;GO:0016020;GO:0016324;GO:0016324;GO:0030001;GO:0030139;GO:0030424;GO:0030425;GO:0030514;GO:0030900;GO:0031526;GO:0035904;GO:0043066;GO:…	K06233	-	T;G	KOG1215;38B6M;3B9HR;3CV9D;485AF;491E5;4GISK	LDL receptor related protein 2 [Source:NCBI gene;Acc:424168]	424168	-	GO:0001822//kidney development;GO:0001843//neural tube closure;GO:0003139//secondary heart field specification;GO:0003148//outflow tract septum morphogenesis;GO:0003223//ventricular compact myocardium morphogenesis;GO:0003281//ventricular septum development;GO:0006766//vitamin metabolic process;GO:0006898//receptor-mediated endocytosis;GO:0006898//receptor-mediated endocytosis;GO:0007507//heart d…	GO:0005768//endosome;GO:0005783//endoplasmic reticulum;GO:0005794//Golgi apparatus;GO:0005903//brush border;GO:0005905//clathrin-coated pit;GO:0009897//external side of plasma membrane;GO:0016020//membrane;GO:0016324//apical plasma membrane;GO:0016324//apical plasma membrane;GO:0030139//endocytic vesicle;GO:0030424//axon;GO:0030425//dendrite;GO:0031526//brush border membrane;GO:0043235//receptor …	GO:0005509//calcium ion binding;GO:0005509//calcium ion binding;GO:0005515//protein binding;GO:0051087//chaperone binding;GO:0005509//calcium ion binding;GO:0005515//protein binding;	ko04979(Cholesterol metabolism);ko04918(Thyroid hormone synthesis);ko04340(Hedgehog signaling pathway)
ENSGALG00000014994	250.058	190.903	309.213	1.61974	0.695765	0.0135201	0.659837	Nodiff	Z	23367125	23375581	-	1608	CRHBP	GO:0005615;GO:0006954;GO:0009755;GO:0030141;GO:0035865;GO:0045055;GO:0048149;GO:0051424;GO:0051424;GO:0051459;GO:0051460;GO:0071356;GO:0071391;GO:0071392;GO:0080135;GO:1900011;	K25477	-	S	2QRNI;38EBS;3BCBY;3CUHD;483Z0;48XFI;4GP3Q	corticotropin releasing hormone binding protein [Source:NCBI gene;Acc:427214]	427214	E1C1R3	GO:0006954//inflammatory response;GO:0009755//hormone-mediated signaling pathway;GO:0035865//cellular response to potassium ion;GO:0045055//regulated exocytosis;GO:0048149//behavioral response to ethanol;GO:0051459//regulation of corticotropin secretion;GO:0051460//negative regulation of corticotropin secretion;GO:0071356//cellular response to tumor necrosis factor;GO:0071391//cellular response t…	GO:0005615//extracellular space;GO:0030141//secretory granule;	GO:0051424//corticotropin-releasing hormone binding;GO:0051424//corticotropin-releasing hormone binding;	-
ENSGALG00000005337	1158.72	1032.07	1285.36	1.24542	0.316629	0.0136143	0.659837	Nodiff	Z	81461079	81494229	+	2895	SNX2	GO:0006886;GO:0006897;GO:0030904;GO:0035091;GO:0006886;GO:0006897;GO:0030904;GO:0035091;GO:0005154;GO:0005158;GO:0005737;GO:0005764;GO:0005768;GO:0006886;GO:0006897;GO:0010008;GO:0016020;GO:0016020;GO:0030904;GO:0030904;GO:0030905;GO:0032991;GO:0035091;GO:0042147;GO:0042802;GO:0042803;GO:0046982;GO:0072673;GO:1990459;GO:1990460;	K17917	-	U	KOG2273;38B4R;3BA59;3CWCM;4883A;491KG;4GPIB	sorting nexin 2 [Source:NCBI gene;Acc:426797]	426797	Q5F406	GO:0006886//intracellular protein transport;GO:0006897//endocytosis;GO:0006886//intracellular protein transport;GO:0006897//endocytosis;GO:0006886//intracellular protein transport;GO:0006897//endocytosis;GO:0042147//retrograde transport, endosome to Golgi;GO:0072673//lamellipodium morphogenesis;	GO:0030904//retromer complex;GO:0030904//retromer complex;GO:0005737//cytoplasm;GO:0005764//lysosome;GO:0005768//endosome;GO:0010008//endosome membrane;GO:0016020//membrane;GO:0016020//membrane;GO:0030904//retromer complex;GO:0030904//retromer complex;GO:0030905//retromer, tubulation complex;GO:0032991//protein-containing complex;	GO:0035091//phosphatidylinositol binding;GO:0035091//phosphatidylinositol binding;GO:0005154//epidermal growth factor receptor binding;GO:0005158//insulin receptor binding;GO:0035091//phosphatidylinositol binding;GO:0042802//identical protein binding;GO:0042803//protein homodimerization activity;GO:0046982//protein heterodimerization activity;GO:1990459//transferrin receptor binding;GO:1990460//l…	ko04144(Endocytosis)
ENSGALG00000014935	536.166	585.705	486.627	0.83084	-0.267358	0.0136221	0.659837	Nodiff	2	102336920	102408052	+	6900	GREB1L	GO:0001656;GO:0001658;GO:0001822;GO:0001822;GO:0003231;GO:0030539;GO:0060065;GO:0060562;GO:0061205;GO:0072177;	-	-	S	2QQXD;38F4F;3B9A0;3CWJC;484ZJ;4908S;4GNHP	GREB1 like retinoic acid receptor coactivator [Source:NCBI gene;Acc:421064]	421064	-	GO:0001656//metanephros development;GO:0001658//branching involved in ureteric bud morphogenesis;GO:0001822//kidney development;GO:0001822//kidney development;GO:0003231//cardiac ventricle development;GO:0030539//male genitalia development;GO:0060065//uterus development;GO:0060562//epithelial tube morphogenesis;GO:0061205//paramesonephric duct development;GO:0072177//mesonephric duct development;	-	-	-
ENSGALG00000010196	161.875	183.886	139.865	0.760605	-0.39478	0.0136309	0.659837	Nodiff	5	37899536	37906784	-	1744	FAM161B	GO:0005881;GO:0015630;	-	-	S	2R2CY;39TZZ;3BJHR;3CUD0;485MK;490DN;4GTM8	family with sequence similarity 161, member B [Source:NCBI gene;Acc:423341]	423341	F1NBR8	-	GO:0005881//cytoplasmic microtubule;GO:0015630//microtubule cytoskeleton;	-	-
ENSGALG00000002944	126.505	106.971	146.039	1.36522	0.449135	0.0136477	0.659837	Nodiff	7	2842238	2943240	+	5008	CPS1	GO:0004087;GO:0004087;GO:0004088;GO:0005524;GO:0005730;GO:0005739;GO:0006207;GO:0006541;GO:0006807;GO:0019433;GO:0032496;GO:0042311;GO:0042645;GO:0046209;GO:0046872;GO:0050667;GO:0070409;GO:0071242;GO:0072341;	K01948	EC:6.3.4.16	E;F	KOG0370;38CAC;3B9FF;3CS9A;4804V;497Y0;4GP4J	carbamoyl-phosphate synthase 1 [Source:NCBI gene;Acc:428994]	428994	Q5KTI9	GO:0006207//'de novo' pyrimidine nucleobase biosynthetic process;GO:0006541//glutamine metabolic process;GO:0006807//nitrogen compound metabolic process;GO:0019433//triglyceride catabolic process;GO:0032496//response to lipopolysaccharide;GO:0042311//vasodilation;GO:0046209//nitric oxide metabolic process;GO:0050667//homocysteine metabolic process;GO:0070409//carbamoyl phosphate biosynthetic proc…	GO:0005730//nucleolus;GO:0005739//mitochondrion;GO:0042645//mitochondrial nucleoid;	GO:0004087//carbamoyl-phosphate synthase (ammonia) activity;GO:0004087//carbamoyl-phosphate synthase (ammonia) activity;GO:0004088//carbamoyl-phosphate synthase (glutamine-hydrolyzing) activity;GO:0005524//ATP binding;GO:0046872//metal ion binding;GO:0072341//modified amino acid binding;	ko00910(Nitrogen metabolism);ko00250(Alanine, aspartate and glutamate metabolism);ko00220(Arginine biosynthesis)
ENSGALG00000023936	95.1926	111.331	79.0542	0.710082	-0.493943	0.0137005	0.659837	Nodiff	21	2230310	2238408	+	1420	-	GO:0016491;	-	-	Q;I	KOG1611;39Y5U;3BGPA;3D4JD;48BS8;48UT0;4GQPX	C-factor-like [Source:NCBI gene;Acc:771069]	771069	E1BUD0	-	-	GO:0016491//oxidoreductase activity;	-
ENSGALG00000005241	2698.18	2509.5	2886.86	1.15037	0.202099	0.0137092	0.659837	Nodiff	11	11352669	11379958	+	2920	DYNC1LI2	GO:0005868;GO:0007018;GO:0005868;GO:0007018;GO:0005868;GO:0007018;	K10416	-	Z;N	KOG3905;38EM3;3BFMD;3CU3J;4863R;490Z4;4GTDD	dynein cytoplasmic 1 light intermediate chain 2 [Source:NCBI gene;Acc:415793]	415793	Q5ZMQ4	GO:0007018//microtubule-based movement;GO:0007018//microtubule-based movement;GO:0007018//microtubule-based movement;	GO:0005868//cytoplasmic dynein complex;GO:0005868//cytoplasmic dynein complex;GO:0005868//cytoplasmic dynein complex;	-	ko05132(Salmonella infection);ko04962(Vasopressin-regulated water reabsorption);ko04145(Phagosome)
ENSGALG00000055082	13.5595	7.66142	19.4577	2.53969	1.34466	0.0137684	0.659837	Up Regulation	5	24970713	24987701	-	1299	-	GO:0016020;GO:0016020;	-	-	-	-	-	-	-	-	GO:0016020//membrane;GO:0016020//membrane;	-	-
ENSGALG00000045199	227.586	190.203	264.969	1.39308	0.47828	0.0138515	0.659837	Nodiff	5	1819414	1821290	+	974	-	GO:0016021;	-	-	-	-	dispanin subfamily A member 2b-like [Source:NCBI gene;Acc:107053353]	-	-	-	GO:0016021//integral component of membrane;	-	-
ENSGALG00000031656	18.2567	11.7219	24.7915	2.11497	1.08063	0.0138548	0.659837	Up Regulation	3	56480470	56633286	-	3868	EYA4	GO:0004725;GO:0007275;GO:0007605;GO:0004725;GO:0007275;GO:0007605;GO:0004725;GO:0007275;GO:0007605;	K17622	EC:3.1.3.48	-	-	EYA transcriptional coactivator and phosphatase 4 [Source:NCBI gene;Acc:395716]	395716	Q9YH98;A0A1D5PPX9	GO:0007275//multicellular organism development;GO:0007605//sensory perception of sound;GO:0007275//multicellular organism development;GO:0007605//sensory perception of sound;GO:0007275//multicellular organism development;GO:0007605//sensory perception of sound;	-	GO:0004725//protein tyrosine phosphatase activity;GO:0004725//protein tyrosine phosphatase activity;GO:0004725//protein tyrosine phosphatase activity;	-
ENSGALG00000010436	14.7642	8.64505	20.8834	2.41565	1.27241	0.0139244	0.659837	Up Regulation	8	22017662	22023808	-	1104	DMBX1	GO:0000977;GO:0000981;GO:0000981;GO:0000981;GO:0003677;GO:0003677;GO:0003677;GO:0005634;GO:0006355;GO:0006355;GO:0006357;GO:1990837;	K24893	-	K	KOG0490;38T2F;3BCIJ;3CX6T;481W9;48W74;4GNYY	diencephalon/mesencephalon homeobox 1 [Source:NCBI gene;Acc:395271]	395271	-	GO:0006355//regulation of transcription, DNA-templated;GO:0006355//regulation of transcription, DNA-templated;GO:0006357//regulation of transcription by RNA polymerase II;	GO:0005634//nucleus;	GO:0000977//RNA polymerase II transcription regulatory region sequence-specific DNA binding;GO:0000981//DNA-binding transcription factor activity, RNA polymerase II-specific;GO:0000981//DNA-binding transcription factor activity, RNA polymerase II-specific;GO:0000981//DNA-binding transcription factor activity, RNA polymerase II-specific;GO:0003677//DNA binding;GO:0003677//DNA binding;GO:0003677//D…	-
ENSGALG00000003286	2688.68	2500.5	2876.87	1.15052	0.202285	0.0139322	0.659837	Nodiff	10	4198612	4227772	+	2574	ACSBG1	GO:0000038;GO:0001676;GO:0004467;GO:0004467;GO:0005737;GO:0005737;GO:0005783;GO:0005886;GO:0016405;GO:0031957;GO:0042759;GO:0051384;	K15013	EC:6.2.1.3	I	KOG1256;39DMK;3BB7F;3CY7N;485NR;48WPN;4GIQP	acyl-CoA synthetase bubblegum family member 1 [Source:NCBI gene;Acc:415361]	415361	-	GO:0000038//very long-chain fatty acid metabolic process;GO:0001676//long-chain fatty acid metabolic process;GO:0042759//long-chain fatty acid biosynthetic process;GO:0051384//response to glucocorticoid;	GO:0005737//cytoplasm;GO:0005737//cytoplasm;GO:0005783//endoplasmic reticulum;GO:0005886//plasma membrane;	GO:0004467//long-chain fatty acid-CoA ligase activity;GO:0004467//long-chain fatty acid-CoA ligase activity;GO:0016405//CoA-ligase activity;GO:0031957//very long-chain fatty acid-CoA ligase activity;	ko04920(Adipocytokine signaling pathway);ko03320(PPAR signaling pathway);ko00071(Fatty acid degradation);ko00061(Fatty acid biosynthesis)
ENSGALG00000041563	3775.69	4038.9	3512.48	0.869664	-0.20147	0.0139478	0.659837	Nodiff	7	2587734	2706504	+	9963	UNC80	-	-	-	-	-	unc-80 homolog, NALCN activator [Source:NCBI gene;Acc:424003]	-	-	-	-	-	-
ENSGALG00000009205	1427.96	1535.57	1320.35	0.859841	-0.217858	0.0140428	0.661063	Nodiff	14	14438034	14559559	-	5051	-	GO:0005515;GO:0007165;GO:0005515;GO:0007165;GO:0005515;GO:0007165;GO:0005515;GO:0007165;GO:0005515;	-	-	S	KOG4485;38EGE;3BFQN;3CS0E;486GE;499BK;4GN06	ankyrin repeat and fibronectin type-III domain- containing 1-like [Source:NCBI gene;Acc:416752]	-	-	GO:0007165//signal transduction;GO:0007165//signal transduction;GO:0007165//signal transduction;GO:0007165//signal transduction;	-	GO:0005515//protein binding;GO:0005515//protein binding;GO:0005515//protein binding;GO:0005515//protein binding;GO:0005515//protein binding;	-
ENSGALG00000040038	1318.4	1216.29	1420.51	1.16791	0.223924	0.0140564	0.661063	Nodiff	1	20257352	20275372	-	3263	MLC1	GO:0005737;GO:0005768;GO:0005783;GO:0005829;GO:0005886;GO:0016021;GO:0016021;GO:0016323;GO:0031410;GO:0032388;GO:0042802;GO:0044877;GO:0047484;GO:0048471;GO:0016021;GO:0016021;	K20070	-	-	-	megalencephalic leukoencephalopathy with subcortical cysts 1 [Source:NCBI gene;Acc:417737]	417737	A0A1D5PIT5	GO:0032388//positive regulation of intracellular transport;GO:0047484//regulation of response to osmotic stress;	GO:0005737//cytoplasm;GO:0005768//endosome;GO:0005783//endoplasmic reticulum;GO:0005829//cytosol;GO:0005886//plasma membrane;GO:0016021//integral component of membrane;GO:0016021//integral component of membrane;GO:0016323//basolateral plasma membrane;GO:0031410//cytoplasmic vesicle;GO:0048471//perinuclear region of cytoplasm;GO:0016021//integral component of membrane;GO:0016021//integral componen…	GO:0042802//identical protein binding;GO:0044877//protein-containing complex binding;	-
ENSGALG00000010127	2502.57	2260.76	2744.37	1.21392	0.279668	0.0142195	0.665271	Nodiff	3	29621182	29628094	+	2080	GLO1	GO:0004462;GO:0004462;GO:0004462;GO:0005654;GO:0005829;GO:0005886;GO:0006357;GO:0008270;GO:0008270;GO:0030316;GO:0043066;GO:0046872;	K01759	EC:4.4.1.5	-	-	glyoxalase I [Source:NCBI gene;Acc:421428]	421428	A0A1L1RZK1	GO:0006357//regulation of transcription by RNA polymerase II;GO:0030316//osteoclast differentiation;GO:0043066//negative regulation of apoptotic process;	GO:0005654//nucleoplasm;GO:0005829//cytosol;GO:0005886//plasma membrane;	GO:0004462//lactoylglutathione lyase activity;GO:0004462//lactoylglutathione lyase activity;GO:0004462//lactoylglutathione lyase activity;GO:0008270//zinc ion binding;GO:0008270//zinc ion binding;GO:0046872//metal ion binding;	ko00620(Pyruvate metabolism)
ENSGALG00000012601	196.83	171.996	221.664	1.28878	0.366005	0.0142291	0.665271	Nodiff	Z	40778614	40804385	-	1219	GOLM1	GO:0005794;GO:0005794;GO:0006997;GO:0019216;	-	-	S	2S080;38EY9;3BAYD;3CY8Q;488RI;48ZBZ;4GSCY	golgi membrane protein 1 [Source:NCBI gene;Acc:427462]	427462	E1C3N9	GO:0006997//nucleus organization;GO:0019216//regulation of lipid metabolic process;	GO:0005794//Golgi apparatus;GO:0005794//Golgi apparatus;	-	-
ENSGALG00000035058	1517.58	1693.54	1341.62	0.792194	-0.336075	0.0142892	0.666133	Nodiff	12	2991079	2994178	-	1233	CAMKV	GO:0004672;GO:0005524;GO:0006468;GO:0098978;GO:0099159;	K08812	EC:2.7.11.-	-	-	CaM kinase like vesicle associated [Source:NCBI gene;Acc:770854]	770854	-	GO:0006468//protein phosphorylation;GO:0099159//regulation of modification of postsynaptic structure;	GO:0098978//glutamatergic synapse;	GO:0004672//protein kinase activity;GO:0005524//ATP binding;	-
ENSGALG00000048440	38.2238	48.268	28.1796	0.583815	-0.776416	0.01442	0.670278	Nodiff	14	16072819	16081731	+	4719	-	GO:0005391;GO:0006883;GO:0010248;GO:0030007;GO:0036376;GO:1902600;GO:1990573;	-	-	-	-	-	-	-	GO:0006883//cellular sodium ion homeostasis;GO:0010248//establishment or maintenance of transmembrane electrochemical gradient;GO:0030007//cellular potassium ion homeostasis;GO:0036376//sodium ion export across plasma membrane;GO:1902600//proton transmembrane transport;GO:1990573//potassium ion import across plasma membrane;	-	GO:0005391//P-type sodium:potassium-exchanging transporter activity;	-
ENSGALG00000010139	500.141	548.469	451.813	0.823772	-0.279682	0.0145666	0.670687	Nodiff	5	37561121	37562401	+	1281	SSTR1	GO:0004930;GO:0004994;GO:0004994;GO:0004994;GO:0005886;GO:0005886;GO:0007186;GO:0007186;GO:0007215;GO:0007218;GO:0016020;GO:0016021;GO:1990830;	K04217	-	O;T	KOG3656;38GGS;3BCR0;3CWA7;4807J;492K5;4GSIU	somatostatin receptor 1 [Source:NCBI gene;Acc:771648]	771648	A9UGZ3	GO:0007186//G protein-coupled receptor signaling pathway;GO:0007186//G protein-coupled receptor signaling pathway;GO:0007215//glutamate receptor signaling pathway;GO:0007218//neuropeptide signaling pathway;GO:1990830//cellular response to leukemia inhibitory factor;	GO:0005886//plasma membrane;GO:0005886//plasma membrane;GO:0016020//membrane;GO:0016021//integral component of membrane;	GO:0004930//G protein-coupled receptor activity;GO:0004994//somatostatin receptor activity;GO:0004994//somatostatin receptor activity;GO:0004994//somatostatin receptor activity;	ko04935(Growth hormone synthesis, secretion and action);ko04080(Neuroactive ligand-receptor interaction);ko04024(cAMP signaling pathway)
ENSGALG00000006272	1287.11	1415.35	1158.87	0.818787	-0.28844	0.0145847	0.670687	Nodiff	9	16037792	16044575	-	2702	-	GO:0004222;GO:0006508;GO:0008237;GO:0004222;GO:0006508;GO:0008237;	K01415	EC:3.4.24.71	E;O	KOG3624;38BNF;3B9I2;3CW8Q;481YV;495J7;4GP5V	endothelin converting enzyme 2 [Source:NCBI gene;Acc:100857430]	100857430	-	GO:0006508//proteolysis;GO:0006508//proteolysis;	-	GO:0004222//metalloendopeptidase activity;GO:0008237//metallopeptidase activity;GO:0004222//metalloendopeptidase activity;GO:0008237//metallopeptidase activity;	-
ENSGALG00000029829	97.9957	114.972	81.0193	0.704687	-0.504946	0.0146695	0.670687	Nodiff	6	10115541	10178635	+	1287	RNLS	GO:0016491;GO:0016651;GO:0005576;GO:0010459;GO:0016491;GO:0016651;GO:0016651;GO:0045776;GO:0051379;GO:0070404;GO:0097621;	K18208	EC:1.6.3.5	-	-	renalase, FAD-dependent amine oxidase [Source:NCBI gene;Acc:423674]	423674	-	GO:0010459//negative regulation of heart rate;GO:0045776//negative regulation of blood pressure;	GO:0005576//extracellular region;	GO:0016491//oxidoreductase activity;GO:0016651//oxidoreductase activity, acting on NAD(P)H;GO:0016491//oxidoreductase activity;GO:0016651//oxidoreductase activity, acting on NAD(P)H;GO:0016651//oxidoreductase activity, acting on NAD(P)H;GO:0051379//epinephrine binding;GO:0070404//NADH binding;GO:0097621//monoamine oxidase activity;	-
ENSGALG00000016680	32.3727	22.2625	42.4829	1.90827	0.932268	0.0146789	0.670687	Nodiff	3	108221189	108246601	-	1396	TFAP2B	GO:0000122;GO:0000122;GO:0000977;GO:0000978;GO:0000978;GO:0000979;GO:0000981;GO:0000981;GO:0000981;GO:0000981;GO:0000987;GO:0000987;GO:0001228;GO:0001228;GO:0001822;GO:0001822;GO:0003091;GO:0003407;GO:0003677;GO:0003700;GO:0003700;GO:0003700;GO:0003700;GO:0003713;GO:0003714;GO:0005634;GO:0005634;GO:0005634;GO:0005634;GO:0005634;GO:0005634;GO:0005634;GO:0006006;GO:0006006;GO:0006355;GO:0006355;GO:…	K09176	-	S;K	KOG3811;38FCA;3BARA;3CZHA;48BE8;48WFG;4GPTJ	transcription factor AP-2 beta [Source:NCBI gene;Acc:395713]	395713	O93346	GO:0000122//negative regulation of transcription by RNA polymerase II;GO:0000122//negative regulation of transcription by RNA polymerase II;GO:0001822//kidney development;GO:0001822//kidney development;GO:0003091//renal water homeostasis;GO:0003407//neural retina development;GO:0006006//glucose metabolic process;GO:0006006//glucose metabolic process;GO:0006355//regulation of transcription, DNA-te…	GO:0005634//nucleus;GO:0005634//nucleus;GO:0005634//nucleus;GO:0005634//nucleus;GO:0005634//nucleus;GO:0005634//nucleus;GO:0005634//nucleus;	GO:0000977//RNA polymerase II transcription regulatory region sequence-specific DNA binding;GO:0000978//RNA polymerase II cis-regulatory region sequence-specific DNA binding;GO:0000978//RNA polymerase II cis-regulatory region sequence-specific DNA binding;GO:0000979//RNA polymerase II core promoter sequence-specific DNA binding;GO:0000981//DNA-binding transcription factor activity, RNA polymerase…	-
ENSGALG00000011639	2369.53	2539.7	2199.37	0.865997	-0.207567	0.0148098	0.670687	Nodiff	5	51944497	51977507	+	4725	-	-	K16463	-	S	2QSH8;39DRZ;3BG5U;3CTRI;485AQ;48X22;4GPRJ	centrosomal protein 170B [Source:NCBI gene;Acc:423494]	423494	-	-	-	-	-
ENSGALG00000011113	1221.72	1315.31	1128.13	0.857689	-0.221474	0.0148442	0.670687	Nodiff	8	28885345	28911667	+	2352	SGIP1	GO:0005543;GO:0005737;GO:0005737;GO:0005886;GO:0005886;GO:0005886;GO:0005905;GO:0005905;GO:0005905;GO:0008017;GO:0015631;GO:0016020;GO:0017124;GO:0030122;GO:0030136;GO:0030136;GO:0048260;GO:0048268;GO:0072583;GO:0072583;GO:0072583;	K20065	-	S;D	KOG2398;39G7W;3BCH5;3CVEE;4812E;496MJ;4GS82	SH3 domain GRB2 like endophilin interacting protein 1 [Source:NCBI gene;Acc:776038]	776038	-	GO:0048260//positive regulation of receptor-mediated endocytosis;GO:0048268//clathrin coat assembly;GO:0072583//clathrin-dependent endocytosis;GO:0072583//clathrin-dependent endocytosis;GO:0072583//clathrin-dependent endocytosis;	GO:0005737//cytoplasm;GO:0005737//cytoplasm;GO:0005886//plasma membrane;GO:0005886//plasma membrane;GO:0005886//plasma membrane;GO:0005905//clathrin-coated pit;GO:0005905//clathrin-coated pit;GO:0005905//clathrin-coated pit;GO:0016020//membrane;GO:0030122//AP-2 adaptor complex;GO:0030136//clathrin-coated vesicle;GO:0030136//clathrin-coated vesicle;	GO:0005543//phospholipid binding;GO:0008017//microtubule binding;GO:0015631//tubulin binding;GO:0017124//SH3 domain binding;	-
ENSGALG00000041744	98.2941	124.178	72.4098	0.583111	-0.778158	0.0149166	0.670687	Nodiff	9	5386182	5392731	+	2034	OTOS	GO:0007605;GO:0007605;	-	-	-	-	otospiralin [Source:NCBI gene;Acc:100858447]	100858447	-	GO:0007605//sensory perception of sound;GO:0007605//sensory perception of sound;	-	-	-
ENSGALG00000026446	51.8094	40.3278	63.2911	1.56941	0.650226	0.0149464	0.670687	Nodiff	10	2873547	2876106	-	1053	CPLX3	GO:0000149;GO:0005326;GO:0005829;GO:0005886;GO:0006836;GO:0016020;GO:0016079;GO:0019905;GO:0030073;GO:0031630;GO:0045202;GO:0046928;GO:0098684;GO:0098993;GO:0099029;	K15295	-	S	2QZ0D;38GSW;3BJ71;3CZVW;4853S;493UJ;4GQ7E	complexin 3 [Source:NCBI gene;Acc:769798]	769798	A9DA55	GO:0006836//neurotransmitter transport;GO:0016079//synaptic vesicle exocytosis;GO:0030073//insulin secretion;GO:0031630//regulation of synaptic vesicle fusion to presynaptic active zone membrane;GO:0046928//regulation of neurotransmitter secretion;	GO:0005829//cytosol;GO:0005886//plasma membrane;GO:0016020//membrane;GO:0045202//synapse;GO:0098684//photoreceptor ribbon synapse;GO:0098993//anchored component of synaptic vesicle membrane;GO:0099029//anchored component of presynaptic active zone membrane;	GO:0000149//SNARE binding;GO:0005326//neurotransmitter transmembrane transporter activity;GO:0019905//syntaxin binding;	ko04721(Synaptic vesicle cycle)
ENSGALG00000015233	24526.3	22921.2	26131.4	1.14006	0.189104	0.014951	0.670687	Nodiff	1	84899572	84913575	-	2268	ATP1B1	GO:0001671;GO:0001671;GO:0005886;GO:0005886;GO:0005890;GO:0005890;GO:0005890;GO:0006813;GO:0006814;GO:0006874;GO:0006883;GO:0008022;GO:0010468;GO:0010882;GO:0014704;GO:0016020;GO:0016323;GO:0016324;GO:0016324;GO:0016328;GO:0019901;GO:0030007;GO:0030315;GO:0030674;GO:0031090;GO:0032781;GO:0035725;GO:0036126;GO:0036376;GO:0036376;GO:0042383;GO:0046034;GO:0050821;GO:0050821;GO:0051117;GO:0055119;GO:…	K01540	-	-	-	ATPase Na+/K+ transporting subunit beta 1 [Source:NCBI gene;Acc:396529]	396529	P08251	GO:0006813//potassium ion transport;GO:0006814//sodium ion transport;GO:0006874//cellular calcium ion homeostasis;GO:0006883//cellular sodium ion homeostasis;GO:0010468//regulation of gene expression;GO:0010882//regulation of cardiac muscle contraction by calcium ion signaling;GO:0030007//cellular potassium ion homeostasis;GO:0032781//positive regulation of ATP-dependent activity;GO:0035725//sodi…	GO:0005886//plasma membrane;GO:0005886//plasma membrane;GO:0005890//sodium:potassium-exchanging ATPase complex;GO:0005890//sodium:potassium-exchanging ATPase complex;GO:0005890//sodium:potassium-exchanging ATPase complex;GO:0014704//intercalated disc;GO:0016020//membrane;GO:0016323//basolateral plasma membrane;GO:0016324//apical plasma membrane;GO:0016324//apical plasma membrane;GO:0016328//later…	GO:0001671//ATPase activator activity;GO:0001671//ATPase activator activity;GO:0008022//protein C-terminus binding;GO:0019901//protein kinase binding;GO:0030674//protein-macromolecule adaptor activity;GO:0051117//ATPase binding;	ko04978(Mineral absorption);ko04976(Bile secretion);ko04974(Protein digestion and absorption);ko04973(Carbohydrate digestion and absorption);ko04972(Pancreatic secretion);ko04971(Gastric acid secretion);ko04970(Salivary secretion);ko04964(Proximal tubule bicarbonate reclamation);ko04961(Endocrine and other factor-regulated calcium reabsorption);ko04960(Aldosterone-regulated sodium reabsorption);k…
ENSGALG00000013225	2452.22	2628.59	2275.86	0.865811	-0.207876	0.0150134	0.670687	Nodiff	11	13982142	14025331	+	1137	VAT1L	GO:0008270;GO:0016491;	-	-	C	KOG1198;38ENU;3CNZ0;3CU5C;486P3;48X65;4GI7Y	vesicle amine transport 1 like [Source:NCBI gene;Acc:430410]	430410	-	-	-	GO:0008270//zinc ion binding;GO:0016491//oxidoreductase activity;	-
ENSGALG00000015436	2024.8	1880.59	2169.01	1.15337	0.20585	0.0150328	0.670687	Nodiff	2	112049920	112062668	+	1997	SDCBP	GO:0000122;GO:0002091;GO:0005109;GO:0005137;GO:0005515;GO:0005546;GO:0005654;GO:0005737;GO:0005829;GO:0005886;GO:0005895;GO:0007265;GO:0007268;GO:0007346;GO:0008284;GO:0008284;GO:0010718;GO:0010862;GO:0030036;GO:0030307;GO:0030307;GO:0030335;GO:0030335;GO:0030511;GO:0031965;GO:0032435;GO:0035556;GO:0042327;GO:0042802;GO:0045121;GO:0045545;GO:0046982;GO:0047485;GO:0070062;GO:1903543;GO:1903553;GO:…	K17254	-	K	KOG0849;39AXI;3BA3P;3CWY0;4826N;491A5;4GHBR	syndecan binding protein [Source:NCBI gene;Acc:421136]	421136	Q5ZHM8	GO:0000122//negative regulation of transcription by RNA polymerase II;GO:0002091//negative regulation of receptor internalization;GO:0007265//Ras protein signal transduction;GO:0007268//chemical synaptic transmission;GO:0007346//regulation of mitotic cell cycle;GO:0008284//positive regulation of cell population proliferation;GO:0008284//positive regulation of cell population proliferation;GO:0010…	GO:0005654//nucleoplasm;GO:0005737//cytoplasm;GO:0005829//cytosol;GO:0005886//plasma membrane;GO:0005895//interleukin-5 receptor complex;GO:0031965//nuclear membrane;GO:0045121//membrane raft;GO:0070062//extracellular exosome;	GO:0005109//frizzled binding;GO:0005137//interleukin-5 receptor binding;GO:0005515//protein binding;GO:0005546//phosphatidylinositol-4,5-bisphosphate binding;GO:0042802//identical protein binding;GO:0045545//syndecan binding;GO:0046982//protein heterodimerization activity;GO:0047485//protein N-terminus binding;GO:0005515//protein binding;	-
ENSGALG00000028327	369.455	406.818	332.092	0.816317	-0.292799	0.0150818	0.670687	Nodiff	5	23120722	23131190	-	888	-	GO:0016020;GO:0016020;GO:0016021;GO:0016021;GO:0016021;	-	-	-	-	-	-	-	-	GO:0016020//membrane;GO:0016020//membrane;GO:0016021//integral component of membrane;GO:0016021//integral component of membrane;GO:0016021//integral component of membrane;	-	-
ENSGALG00000053925	90.6873	106.217	75.1579	0.707591	-0.499012	0.0151051	0.670687	Nodiff	AADN05001161.1	1185	9282	-	4012	-	GO:0005789;GO:0005886;GO:0016020;GO:0016021;GO:0016020;GO:0016021;	-	-	-	-	-	-	-	-	GO:0005789//endoplasmic reticulum membrane;GO:0005886//plasma membrane;GO:0016020//membrane;GO:0016021//integral component of membrane;GO:0016020//membrane;GO:0016021//integral component of membrane;	-	-
ENSGALG00000054667	208.223	234.42	182.026	0.776494	-0.364953	0.0151079	0.670687	Nodiff	16	613212	620890	-	2133	-	-	-	-	-	-	zinc finger protein 252-like [Source:NCBI gene;Acc:100857850]	-	-	-	-	-	-
ENSGALG00000031679	463.898	508.25	419.546	0.825472	-0.276708	0.0151293	0.670687	Nodiff	28	1000601	1001975	-	441	POLE4	GO:0008622;GO:0046982;GO:0140672;	-	-	-	-	DNA polymerase epsilon 4, accessory subunit [Source:NCBI gene;Acc:107055326]	-	-	-	GO:0008622//epsilon DNA polymerase complex;GO:0140672//ATAC complex;	GO:0046982//protein heterodimerization activity;	-
ENSGALG00000001525	676.374	618.331	734.417	1.18774	0.248221	0.0151395	0.670687	Nodiff	27	6118078	6127639	+	2979	-	-	K21348	-	S	2QT1M;39VGQ;3BBVD;3CYCG;486RQ;49643;4GJ9E	calcium binding and coiled-coil domain 2 [Source:NCBI gene;Acc:419993]	419993	-	-	-	-	ko05164(Influenza A);ko05131(Shigellosis);ko04137(Mitophagy - animal)
ENSGALG00000033186	450.137	491.829	408.445	0.830462	-0.268015	0.0151418	0.670687	Nodiff	1	80695646	80706829	+	1275	LRRC58	GO:0005515;	-	-	-	-	leucine rich repeat containing 58 [Source:HGNC Symbol;Acc:HGNC:26968]	-	-	-	-	GO:0005515//protein binding;	-
ENSGALG00000052684	193.771	217.939	169.604	0.778216	-0.361758	0.015232	0.672819	Nodiff	1	194147757	194175070	-	2116	-	GO:0003723;GO:0004518;GO:0005634;GO:0005829;GO:0006402;GO:0090305;	-	-	-	-	-	-	-	GO:0006402//mRNA catabolic process;GO:0090305//nucleic acid phosphodiester bond hydrolysis;	GO:0005634//nucleus;GO:0005829//cytosol;	GO:0003723//RNA binding;GO:0004518//nuclease activity;	-
ENSGALG00000030251	641.457	697.018	585.895	0.840574	-0.250553	0.0153319	0.675166	Nodiff	2	140875182	140993382	-	3723	ADCY8	GO:0004016;GO:0004016;GO:0005886;GO:0006171;GO:0007613;GO:0007616;GO:0007626;GO:0008294;GO:0009190;GO:0010255;GO:0014069;GO:0016323;GO:0016324;GO:0016849;GO:0030424;GO:0030425;GO:0031915;GO:0032793;GO:0032809;GO:0035556;GO:0035774;GO:0042593;GO:0048786;GO:0050804;GO:0051480;GO:0060076;GO:0071315;GO:0080135;GO:0098685;GO:0098686;GO:0098978;GO:0099056;GO:0150076;GO:1900273;GO:1900454;GO:0004016;GO:…	K08048	EC:4.6.1.1	-	-	adenylate cyclase 8 [Source:NCBI gene;Acc:420328]	420328	A0A1D5PGV0	GO:0006171//cAMP biosynthetic process;GO:0007613//memory;GO:0007616//long-term memory;GO:0007626//locomotory behavior;GO:0009190//cyclic nucleotide biosynthetic process;GO:0010255//glucose mediated signaling pathway;GO:0031915//positive regulation of synaptic plasticity;GO:0032793//positive regulation of CREB transcription factor activity;GO:0035556//intracellular signal transduction;GO:0035774//…	GO:0005886//plasma membrane;GO:0014069//postsynaptic density;GO:0016323//basolateral plasma membrane;GO:0016324//apical plasma membrane;GO:0030424//axon;GO:0030425//dendrite;GO:0032809//neuronal cell body membrane;GO:0048786//presynaptic active zone;GO:0060076//excitatory synapse;GO:0098685//Schaffer collateral - CA1 synapse;GO:0098686//hippocampal mossy fiber to CA3 synapse;GO:0098978//glutamate…	GO:0004016//adenylate cyclase activity;GO:0004016//adenylate cyclase activity;GO:0008294//calcium- and calmodulin-responsive adenylate cyclase activity;GO:0016849//phosphorus-oxygen lyase activity;GO:0004016//adenylate cyclase activity;GO:0016849//phosphorus-oxygen lyase activity;	ko05414(Dilated cardiomyopathy);ko05207(Chemical carcinogenesis - receptor activation);ko05200(Pathways in cancer);ko05166(Human T-cell leukemia virus 1 infection);ko05163(Human cytomegalovirus infection);ko05032(Morphine addiction);ko04976(Bile secretion);ko04972(Pancreatic secretion);ko04971(Gastric acid secretion);ko04970(Salivary secretion);ko04935(Growth hormone synthesis, secretion and acti…
ENSGALG00000013022	769.361	836.43	702.292	0.83963	-0.252174	0.0153696	0.675166	Nodiff	1	61134027	61599794	+	7116	CACNA1C	GO:0005216;GO:0005245;GO:0005891;GO:0006811;GO:0016020;GO:0055085;GO:0070588;GO:0005216;GO:0005216;GO:0005244;GO:0005245;GO:0005245;GO:0005245;GO:0005262;GO:0005516;GO:0005886;GO:0005891;GO:0005891;GO:0006811;GO:0006811;GO:0006816;GO:0016020;GO:0016020;GO:0016020;GO:0016021;GO:0030054;GO:0030315;GO:0030425;GO:0034765;GO:0042383;GO:0042995;GO:0043204;GO:0045202;GO:0045211;GO:0046872;GO:0055085;GO:…	K04850	-	P;U	KOG2301;38BYK;3BAHQ;3CSUW;47YTR;48ZMN;4GNKQ	calcium voltage-gated channel subunit alpha1 C [Source:NCBI gene;Acc:395891]	395891	-	GO:0006811//ion transport;GO:0055085//transmembrane transport;GO:0070588//calcium ion transmembrane transport;GO:0006811//ion transport;GO:0006811//ion transport;GO:0006816//calcium ion transport;GO:0034765//regulation of ion transmembrane transport;GO:0055085//transmembrane transport;GO:0055085//transmembrane transport;GO:0070588//calcium ion transmembrane transport;GO:0070588//calcium ion trans…	GO:0005891//voltage-gated calcium channel complex;GO:0016020//membrane;GO:0005886//plasma membrane;GO:0005891//voltage-gated calcium channel complex;GO:0005891//voltage-gated calcium channel complex;GO:0016020//membrane;GO:0016020//membrane;GO:0016020//membrane;GO:0016021//integral component of membrane;GO:0030054//cell junction;GO:0030315//T-tubule;GO:0030425//dendrite;GO:0042383//sarcolemma;GO:…	GO:0005216//ion channel activity;GO:0005245//voltage-gated calcium channel activity;GO:0005216//ion channel activity;GO:0005216//ion channel activity;GO:0005244//voltage-gated ion channel activity;GO:0005245//voltage-gated calcium channel activity;GO:0005245//voltage-gated calcium channel activity;GO:0005245//voltage-gated calcium channel activity;GO:0005262//calcium channel activity;GO:0005516//…	ko05414(Dilated cardiomyopathy);ko05412(Arrhythmogenic right ventricular cardiomyopathy);ko05410(Hypertrophic cardiomyopathy);ko05207(Chemical carcinogenesis - receptor activation);ko05031(Amphetamine addiction);ko05022(Pathways of neurodegeneration - multiple diseases);ko05020(Prion disease);ko05010(Alzheimer disease);ko04935(Growth hormone synthesis, secretion and action);ko04934(Cushing syndro…
ENSGALG00000003113	1249.34	1365.9	1132.78	0.829332	-0.269978	0.015544	0.679268	Nodiff	13	10825770	10832208	+	3081	RGS14	GO:0001965;GO:0005092;GO:0005092;GO:0005096;GO:0005096;GO:0005819;GO:0007051;GO:0007051;GO:0007165;GO:0008017;GO:0008017;GO:0008277;GO:0030695;GO:0035556;GO:0051301;GO:0051301;GO:0001965;GO:0005092;GO:0005096;GO:0007051;GO:0007165;GO:0008017;GO:0008277;GO:0030695;GO:0035556;GO:0051301;	K17706	-	S;T	KOG3589;39VZ8;3BCAI;3CXGM;485R6;497B2;4GJTX	regulator of G-protein signaling 14 [Source:NCBI gene;Acc:769193]	769193	F1NAM4	GO:0007051//spindle organization;GO:0007051//spindle organization;GO:0007165//signal transduction;GO:0008277//regulation of G protein-coupled receptor signaling pathway;GO:0035556//intracellular signal transduction;GO:0051301//cell division;GO:0051301//cell division;GO:0007051//spindle organization;GO:0007165//signal transduction;GO:0008277//regulation of G protein-coupled receptor signaling path…	GO:0005819//spindle;	GO:0001965//G-protein alpha-subunit binding;GO:0005092//GDP-dissociation inhibitor activity;GO:0005092//GDP-dissociation inhibitor activity;GO:0005096//GTPase activator activity;GO:0005096//GTPase activator activity;GO:0008017//microtubule binding;GO:0008017//microtubule binding;GO:0030695//GTPase regulator activity;GO:0001965//G-protein alpha-subunit binding;GO:0005092//GDP-dissociation inhibito…	ko04015(Rap1 signaling pathway)
ENSGALG00000013143	125.298	144.907	105.688	0.729352	-0.455312	0.0155549	0.679268	Nodiff	1	64882883	65118721	+	2922	PDE3A	GO:0001556;GO:0004114;GO:0004115;GO:0005829;GO:0007165;GO:0008081;GO:0009410;GO:0016020;GO:0019933;GO:0019934;GO:0040020;GO:0043116;GO:0043117;GO:0043951;GO:0060282;GO:0071321;GO:0071560;	K19021	EC:3.1.4.17	T	2QSV8;38C43;3BDAW;3CUCX;485MS;493SN;4GJN2	phosphodiesterase 3A [Source:NCBI gene;Acc:418185]	418185	E1C0B2	GO:0001556//oocyte maturation;GO:0007165//signal transduction;GO:0009410//response to xenobiotic stimulus;GO:0019933//cAMP-mediated signaling;GO:0019934//cGMP-mediated signaling;GO:0040020//regulation of meiotic nuclear division;GO:0043116//negative regulation of vascular permeability;GO:0043117//positive regulation of vascular permeability;GO:0043951//negative regulation of cAMP-mediated signali…	GO:0005829//cytosol;GO:0016020//membrane;	GO:0004114//3',5'-cyclic-nucleotide phosphodiesterase activity;GO:0004115//3',5'-cyclic-AMP phosphodiesterase activity;GO:0008081//phosphoric diester hydrolase activity;	ko05032(Morphine addiction);ko04924(Renin secretion);ko04024(cAMP signaling pathway);ko04022(cGMP-PKG signaling pathway);ko00230(Purine metabolism)
ENSGALG00000033507	105.748	88.6587	122.838	1.38552	0.470424	0.0155961	0.679268	Nodiff	11	15678088	15728004	+	3844	PLCG2	GO:0001775;GO:0001784;GO:0001878;GO:0002092;GO:0002223;GO:0002224;GO:0002281;GO:0002316;GO:0002732;GO:0004435;GO:0004435;GO:0005515;GO:0005737;GO:0005829;GO:0005886;GO:0006629;GO:0006661;GO:0007165;GO:0008081;GO:0009395;GO:0010468;GO:0010628;GO:0019216;GO:0019722;GO:0019901;GO:0030183;GO:0031663;GO:0032237;GO:0032481;GO:0032496;GO:0032587;GO:0032733;GO:0032735;GO:0032743;GO:0032747;GO:0032755;GO:…	K05859	EC:3.1.4.11	-	-	phospholipase C gamma 2 [Source:NCBI gene;Acc:415805]	415805	A0A1D5PHP4	GO:0001775//cell activation;GO:0001878//response to yeast;GO:0002092//positive regulation of receptor internalization;GO:0002223//stimulatory C-type lectin receptor signaling pathway;GO:0002224//toll-like receptor signaling pathway;GO:0002281//macrophage activation involved in immune response;GO:0002316//follicular B cell differentiation;GO:0002732//positive regulation of dendritic cell cytokine …	GO:0005737//cytoplasm;GO:0005829//cytosol;GO:0005886//plasma membrane;GO:0032587//ruffle membrane;GO:0048471//perinuclear region of cytoplasm;GO:0097708//intracellular vesicle;	GO:0001784//phosphotyrosine residue binding;GO:0004435//phosphatidylinositol phospholipase C activity;GO:0004435//phosphatidylinositol phospholipase C activity;GO:0005515//protein binding;GO:0008081//phosphoric diester hydrolase activity;GO:0019901//protein kinase binding;GO:0097110//scaffold protein binding;GO:0140031//phosphorylation-dependent protein binding;GO:1990782//protein tyrosine kinase…	ko05225(Hepatocellular carcinoma);ko05223(Non-small cell lung cancer);ko05214(Glioma);ko05206(MicroRNAs in cancer);ko05205(Proteoglycans in cancer);ko05200(Pathways in cancer);ko05171(Coronavirus disease - COVID-19);ko05170(Human immunodeficiency virus 1 infection);ko05169(Epstein-Barr virus infection);ko05167(Kaposi sarcoma-associated herpesvirus infection);ko05131(Shigellosis);ko05120(Epithelia…
ENSGALG00000008866	67.8652	81.3138	54.4165	0.669216	-0.579457	0.0156329	0.679268	Nodiff	3	9992627	10131875	-	2647	WDPCP	GO:0001822;GO:0002093;GO:0005515;GO:0007224;GO:0007399;GO:0010762;GO:0042733;GO:0042733;GO:0043010;GO:0043587;GO:0043587;GO:0044782;GO:0045184;GO:0048568;GO:0051893;GO:0055123;GO:0060021;GO:0060021;GO:0060271;GO:0060541;GO:0072359;GO:0090521;GO:0097541;GO:1900027;GO:2000114;	K22863	-	S	2QR8Y;38JAV;3BH6Y;3CTEA;4888Q;495JB;4GQG0	WD repeat containing planar cell polarity effector [Source:NCBI gene;Acc:428553]	428553	-	GO:0001822//kidney development;GO:0002093//auditory receptor cell morphogenesis;GO:0007224//smoothened signaling pathway;GO:0007399//nervous system development;GO:0010762//regulation of fibroblast migration;GO:0042733//embryonic digit morphogenesis;GO:0042733//embryonic digit morphogenesis;GO:0043010//camera-type eye development;GO:0043587//tongue morphogenesis;GO:0043587//tongue morphogenesis;GO…	GO:0097541//axonemal basal plate;	GO:0005515//protein binding;	-
ENSGALG00000031144	72.3601	86.2255	58.4946	0.67839	-0.559812	0.0157167	0.679478	Nodiff	4	4546836	4549231	+	1408	ZIC3	GO:0000977;GO:0000978;GO:0000978;GO:0000978;GO:0000981;GO:0001228;GO:0001228;GO:0001947;GO:0001947;GO:0003677;GO:0003700;GO:0003700;GO:0005634;GO:0005634;GO:0005634;GO:0005654;GO:0005737;GO:0006357;GO:0007368;GO:0007368;GO:0007389;GO:0007417;GO:0009952;GO:0030324;GO:0035469;GO:0035545;GO:0043565;GO:0045893;GO:0045944;GO:0045944;GO:0045944;GO:0046872;GO:0071907;GO:0071910;GO:1990837;	K18487	-	-	-	Zic family member 3 [Source:NCBI gene;Acc:422251]	422251	A0A1D5PRL4	GO:0001947//heart looping;GO:0001947//heart looping;GO:0006357//regulation of transcription by RNA polymerase II;GO:0007368//determination of left/right symmetry;GO:0007368//determination of left/right symmetry;GO:0007389//pattern specification process;GO:0007417//central nervous system development;GO:0009952//anterior/posterior pattern specification;GO:0030324//lung development;GO:0035469//deter…	GO:0005634//nucleus;GO:0005634//nucleus;GO:0005634//nucleus;GO:0005654//nucleoplasm;GO:0005737//cytoplasm;	GO:0000977//RNA polymerase II transcription regulatory region sequence-specific DNA binding;GO:0000978//RNA polymerase II cis-regulatory region sequence-specific DNA binding;GO:0000978//RNA polymerase II cis-regulatory region sequence-specific DNA binding;GO:0000978//RNA polymerase II cis-regulatory region sequence-specific DNA binding;GO:0000981//DNA-binding transcription factor activity, RNA po…	ko04550(Signaling pathways regulating pluripotency of stem cells)
ENSGALG00000032658	691.664	749.549	633.778	0.845545	-0.242046	0.0157228	0.679478	Nodiff	27	3775310	3882647	+	4912	FMNL1	GO:0003779;GO:0007010;GO:0008360;GO:0016043;GO:0022604;GO:0030036;GO:0031267;GO:0003779;GO:0007010;GO:0008360;GO:0016043;GO:0022604;GO:0030036;GO:0031267;GO:0003779;GO:0005829;GO:0007010;GO:0008360;GO:0008360;GO:0016043;GO:0022604;GO:0030036;GO:0030866;GO:0031267;GO:0032794;GO:0003779;GO:0007010;GO:0008360;GO:0016043;GO:0022604;GO:0030036;GO:0031267;GO:0005884;GO:0005884;GO:0007010;GO:0007010;GO:…	-	-	-	-	formin like 1 [Source:NCBI gene;Acc:419965]	-	-	GO:0007010//cytoskeleton organization;GO:0008360//regulation of cell shape;GO:0016043//cellular component organization;GO:0022604//regulation of cell morphogenesis;GO:0030036//actin cytoskeleton organization;GO:0007010//cytoskeleton organization;GO:0008360//regulation of cell shape;GO:0016043//cellular component organization;GO:0022604//regulation of cell morphogenesis;GO:0030036//actin cytoskele…	GO:0005829//cytosol;GO:0005884//actin filament;GO:0005884//actin filament;	GO:0003779//actin binding;GO:0031267//small GTPase binding;GO:0003779//actin binding;GO:0031267//small GTPase binding;GO:0003779//actin binding;GO:0031267//small GTPase binding;GO:0032794//GTPase activating protein binding;GO:0003779//actin binding;GO:0031267//small GTPase binding;GO:0008017//microtubule binding;GO:0008017//microtubule binding;	-
ENSGALG00000027231	176.757	200.341	153.172	0.764556	-0.387306	0.0159465	0.684745	Nodiff	17	1016268	1016997	-	654	NRARP	GO:0000122;GO:0001569;GO:0001569;GO:0001938;GO:0001938;GO:0002040;GO:0002043;GO:0002043;GO:0005515;GO:0007219;GO:0022407;GO:0032525;GO:0045581;GO:0045746;GO:0045746;GO:0045746;GO:0090263;GO:0090263;GO:1902367;	-	-	-	-	NOTCH regulated ankyrin repeat protein [Source:HGNC Symbol;Acc:HGNC:33843]	431400	-	GO:0000122//negative regulation of transcription by RNA polymerase II;GO:0001569//branching involved in blood vessel morphogenesis;GO:0001569//branching involved in blood vessel morphogenesis;GO:0001938//positive regulation of endothelial cell proliferation;GO:0001938//positive regulation of endothelial cell proliferation;GO:0002040//sprouting angiogenesis;GO:0002043//blood vessel endothelial cel…	-	GO:0005515//protein binding;	-
ENSGALG00000030101	1435.89	1541.62	1330.16	0.86283	-0.212852	0.0159807	0.684745	Nodiff	1	49592788	49597177	-	1725	CSDC2	GO:0003676;	-	-	-	-	cold shock domain containing C2, RNA binding [Source:NCBI gene;Acc:425183]	425183	-	-	-	GO:0003676//nucleic acid binding;	-
ENSGALG00000003021	352.247	269.782	434.713	1.61135	0.688266	0.0160702	0.684745	Nodiff	10	4080158	4092860	-	3684	CHRNA5	GO:0004888;GO:0005216;GO:0005230;GO:0005892;GO:0006811;GO:0015464;GO:0016021;GO:0022848;GO:0034220;GO:0035094;GO:0035095;GO:0045211;GO:0098691;GO:2000300;GO:0004888;GO:0005216;GO:0005230;GO:0006811;GO:0016021;GO:0022848;GO:0034220;GO:0045211;	K04807	-	U;T	KOG3645;38G8B;3BGXW;3CZSF;487P9;493JC;4GQ5A	cholinergic receptor nicotinic alpha 5 subunit [Source:NCBI gene;Acc:386577]	386577	P26152	GO:0006811//ion transport;GO:0034220//ion transmembrane transport;GO:0035094//response to nicotine;GO:0035095//behavioral response to nicotine;GO:2000300//regulation of synaptic vesicle exocytosis;GO:0006811//ion transport;GO:0034220//ion transmembrane transport;	GO:0005892//acetylcholine-gated channel complex;GO:0016021//integral component of membrane;GO:0045211//postsynaptic membrane;GO:0098691//dopaminergic synapse;GO:0016021//integral component of membrane;GO:0045211//postsynaptic membrane;	GO:0004888//transmembrane signaling receptor activity;GO:0005216//ion channel activity;GO:0005230//extracellular ligand-gated ion channel activity;GO:0015464//acetylcholine receptor activity;GO:0022848//acetylcholine-gated cation-selective channel activity;GO:0004888//transmembrane signaling receptor activity;GO:0005216//ion channel activity;GO:0005230//extracellular ligand-gated ion channel acti…	ko04080(Neuroactive ligand-receptor interaction)
ENSGALG00000039346	940.148	1014.97	865.325	0.852561	-0.230124	0.0161157	0.684745	Nodiff	2	149036336	149118741	+	6794	ARHGAP39	GO:0005515;GO:0005856;GO:0007165;GO:0005515;GO:0005856;GO:0007165;GO:0005515;GO:0005856;GO:0007165;GO:0005515;GO:0005856;GO:0098978;GO:0099173;	-	-	-	-	Rho GTPase activating protein 39-like [Source:NCBI gene;Acc:768579]	-	-	GO:0007165//signal transduction;GO:0007165//signal transduction;GO:0007165//signal transduction;GO:0099173//postsynapse organization;	GO:0005856//cytoskeleton;GO:0005856//cytoskeleton;GO:0005856//cytoskeleton;GO:0005856//cytoskeleton;GO:0098978//glutamatergic synapse;	GO:0005515//protein binding;GO:0005515//protein binding;GO:0005515//protein binding;GO:0005515//protein binding;	-
ENSGALG00000003832	884.805	958.048	811.562	0.847099	-0.239397	0.0161212	0.684745	Nodiff	12	3286872	3310838	+	2201	TEX264	GO:0000421;GO:0005634;GO:0005657;GO:0005789;GO:0005829;GO:0038023;GO:0061709;GO:0106300;	-	-	S	2S3D1;39RGK;3BA0I;3CWI1;4863N;492KA;4GIF0	testis expressed 264 [Source:NCBI gene;Acc:415938]	415938	E1C8H2	GO:0061709//reticulophagy;GO:0106300//protein-DNA covalent cross-linking repair;	GO:0000421//autophagosome membrane;GO:0005634//nucleus;GO:0005657//replication fork;GO:0005789//endoplasmic reticulum membrane;GO:0005829//cytosol;	GO:0038023//signaling receptor activity;	-
ENSGALG00000007623	1696.56	1888.62	1504.49	0.796608	-0.328059	0.0161849	0.684745	Nodiff	18	10190070	10295277	-	7869	CACNA1G	GO:0001508;GO:0001518;GO:0002027;GO:0005216;GO:0005216;GO:0005244;GO:0005245;GO:0005245;GO:0005245;GO:0005248;GO:0005261;GO:0005261;GO:0005262;GO:0005737;GO:0005886;GO:0005886;GO:0005886;GO:0005886;GO:0005891;GO:0005891;GO:0006811;GO:0006811;GO:0006816;GO:0007268;GO:0008332;GO:0008332;GO:0008332;GO:0008332;GO:0008332;GO:0010045;GO:0016020;GO:0016020;GO:0016020;GO:0016021;GO:0019228;GO:0034765;GO:…	K04854	-	T;P;C	KOG2302;3ARFA;3C2IT;3DHPC;47ZG2;491K6;4GQW7	calcium voltage-gated channel subunit alpha1 G [Source:NCBI gene;Acc:769385]	769385	-	GO:0001508//action potential;GO:0002027//regulation of heart rate;GO:0006811//ion transport;GO:0006811//ion transport;GO:0006816//calcium ion transport;GO:0007268//chemical synaptic transmission;GO:0010045//response to nickel cation;GO:0019228//neuronal action potential;GO:0034765//regulation of ion transmembrane transport;GO:0035725//sodium ion transmembrane transport;GO:0042391//regulation of m…	GO:0001518//voltage-gated sodium channel complex;GO:0005737//cytoplasm;GO:0005886//plasma membrane;GO:0005886//plasma membrane;GO:0005886//plasma membrane;GO:0005886//plasma membrane;GO:0005891//voltage-gated calcium channel complex;GO:0005891//voltage-gated calcium channel complex;GO:0016020//membrane;GO:0016020//membrane;GO:0016020//membrane;GO:0016021//integral component of membrane;GO:0043005…	GO:0005216//ion channel activity;GO:0005216//ion channel activity;GO:0005244//voltage-gated ion channel activity;GO:0005245//voltage-gated calcium channel activity;GO:0005245//voltage-gated calcium channel activity;GO:0005245//voltage-gated calcium channel activity;GO:0005248//voltage-gated sodium channel activity;GO:0005261//cation channel activity;GO:0005261//cation channel activity;GO:0005262/…	ko04934(Cushing syndrome);ko04930(Type II diabetes mellitus);ko04929(GnRH secretion);ko04927(Cortisol synthesis and secretion);ko04925(Aldosterone synthesis and secretion);ko04713(Circadian entrainment);ko04020(Calcium signaling pathway);ko04010(MAPK signaling pathway)
ENSGALG00000013598	54.6883	66.8787	42.498	0.635449	-0.654152	0.0162486	0.684745	Nodiff	2	89883629	89906746	-	1510	SCGN	GO:0005509;	K23928	-	D;Z;T	KOG0027;38DDJ;3BCKQ;3CTRZ;4875X;48VZT;4GJDD	secretagogin, EF-hand calcium binding protein [Source:NCBI gene;Acc:421001]	421001	E1BY74	-	-	GO:0005509//calcium ion binding;	-
ENSGALG00000006173	118.736	94.3962	143.075	1.51569	0.599973	0.0162684	0.684745	Nodiff	2	6172986	6255970	-	3139	XYLB	GO:0004856;GO:0004856;GO:0005975;GO:0005997;GO:0016773;GO:0042732;GO:0005975;GO:0016773;GO:0005975;GO:0016773;	K00854	EC:2.7.1.17	-	-	xylulokinase [Source:NCBI gene;Acc:420432]	420432	-	GO:0005975//carbohydrate metabolic process;GO:0005997//xylulose metabolic process;GO:0042732//D-xylose metabolic process;GO:0005975//carbohydrate metabolic process;GO:0005975//carbohydrate metabolic process;	-	GO:0004856//xylulokinase activity;GO:0004856//xylulokinase activity;GO:0016773//phosphotransferase activity, alcohol group as acceptor;GO:0016773//phosphotransferase activity, alcohol group as acceptor;GO:0016773//phosphotransferase activity, alcohol group as acceptor;	ko00040(Pentose and glucuronate interconversions)
ENSGALG00000007519	2351.35	2150.9	2551.79	1.18638	0.246569	0.0162861	0.684745	Nodiff	2	15965524	15992654	-	3565	ACBD5	GO:0000062;GO:0030242;GO:0000062;GO:0005654;GO:0005777;GO:0030242;GO:0030242;	-	-	I	KOG0817;393R9;3BEYJ;3D0MI;485G8;48X2W;4GSGZ	acyl-CoA binding domain containing 5 [Source:NCBI gene;Acc:420488]	420488	Q5ZHQ6	GO:0030242//autophagy of peroxisome;GO:0030242//autophagy of peroxisome;GO:0030242//autophagy of peroxisome;	GO:0005654//nucleoplasm;GO:0005777//peroxisome;	GO:0000062//fatty-acyl-CoA binding;GO:0000062//fatty-acyl-CoA binding;	-
ENSGALG00000042077	447.228	495.045	399.41	0.806815	-0.30969	0.016288	0.684745	Nodiff	19	5668833	5673549	+	3601	HIC1	GO:0000122;GO:0000122;GO:0000122;GO:0000122;GO:0000785;GO:0001227;GO:0003677;GO:0003700;GO:0003700;GO:0003700;GO:0005515;GO:0005634;GO:0008630;GO:0008630;GO:0008630;GO:0008630;GO:0030178;GO:0042826;GO:0043517;GO:0043565;GO:0046872;GO:1990837;	K24384	-	-	-	HIC ZBTB transcriptional repressor 1 [Source:NCBI gene;Acc:396164]	396164	Q90850	GO:0000122//negative regulation of transcription by RNA polymerase II;GO:0000122//negative regulation of transcription by RNA polymerase II;GO:0000122//negative regulation of transcription by RNA polymerase II;GO:0000122//negative regulation of transcription by RNA polymerase II;GO:0008630//intrinsic apoptotic signaling pathway in response to DNA damage;GO:0008630//intrinsic apoptotic signaling p…	GO:0000785//chromatin;GO:0005634//nucleus;	GO:0001227//DNA-binding transcription repressor activity, RNA polymerase II-specific;GO:0003677//DNA binding;GO:0003700//DNA-binding transcription factor activity;GO:0003700//DNA-binding transcription factor activity;GO:0003700//DNA-binding transcription factor activity;GO:0005515//protein binding;GO:0042826//histone deacetylase binding;GO:0043565//sequence-specific DNA binding;GO:0046872//metal …	-
ENSGALG00000007993	489.599	539.059	440.138	0.816493	-0.292487	0.0164284	0.684745	Nodiff	4	13231208	13304309	+	2807	DCX	GO:0001764;GO:0005737;GO:0005737;GO:0005930;GO:0007420;GO:0021766;GO:0021819;GO:0021860;GO:0021952;GO:0035082;GO:0035556;GO:0035556;GO:0042461;GO:0042995;GO:0043005;GO:0048675;GO:0048813;GO:0060041;GO:0005737;GO:0005930;GO:0035082;GO:0035556;GO:0035556;GO:0042461;GO:0042995;GO:0060041;	K16579	-	D;Z;S	KOG3757;38NNH;3BAJJ;3CT2M;485MA;4940U;4GRNY	doublecortin [Source:NCBI gene;Acc:374242]	374242	Q98SS5	GO:0001764//neuron migration;GO:0007420//brain development;GO:0021766//hippocampus development;GO:0021819//layer formation in cerebral cortex;GO:0021860//pyramidal neuron development;GO:0021952//central nervous system projection neuron axonogenesis;GO:0035082//axoneme assembly;GO:0035556//intracellular signal transduction;GO:0035556//intracellular signal transduction;GO:0042461//photoreceptor cel…	GO:0005737//cytoplasm;GO:0005737//cytoplasm;GO:0005930//axoneme;GO:0042995//cell projection;GO:0043005//neuron projection;GO:0005737//cytoplasm;GO:0005930//axoneme;GO:0042995//cell projection;	-	-
ENSGALG00000007536	113.543	131.483	95.6025	0.727112	-0.459751	0.0164464	0.684745	Nodiff	9	15157571	15163391	+	1785	-	GO:0003904;GO:0006281;GO:0003904;GO:0006281;GO:0003677;GO:0003904;GO:0003904;GO:0003904;GO:0006281;GO:0006281;GO:0006281;GO:0006974;GO:0016829;GO:0018298;GO:0003904;GO:0006281;	K01669	EC:4.1.99.3	T;L	KOG0133;38EHG;3BH22;3CX79;485IS;49865;4GJS0	deoxyribodipyrimidine photo-lyase-like [Source:NCBI gene;Acc:424919]	424919	-	GO:0006281//DNA repair;GO:0006281//DNA repair;GO:0006281//DNA repair;GO:0006281//DNA repair;GO:0006281//DNA repair;GO:0006974//cellular response to DNA damage stimulus;GO:0018298//protein-chromophore linkage;GO:0006281//DNA repair;	-	GO:0003904//deoxyribodipyrimidine photo-lyase activity;GO:0003904//deoxyribodipyrimidine photo-lyase activity;GO:0003677//DNA binding;GO:0003904//deoxyribodipyrimidine photo-lyase activity;GO:0003904//deoxyribodipyrimidine photo-lyase activity;GO:0003904//deoxyribodipyrimidine photo-lyase activity;GO:0016829//lyase activity;GO:0003904//deoxyribodipyrimidine photo-lyase activity;	-
ENSGALG00000014903	499.721	438.719	560.723	1.27809	0.353992	0.0164626	0.684745	Nodiff	Z	15862431	15924311	+	3536	ITGA2	GO:0001540;GO:0005518;GO:0005886;GO:0005925;GO:0006929;GO:0007155;GO:0007160;GO:0007229;GO:0008305;GO:0009897;GO:0009986;GO:0009986;GO:0031589;GO:0033627;GO:0034666;GO:0038064;GO:0038065;GO:0044877;GO:0045178;GO:0048333;GO:0098639;GO:0007155;GO:0008305;	K06481	-	W;M	KOG3637;39TSF;3BK8D;3CXH9;482HI;490VE;4GRX4	integrin subunit alpha 2 [Source:NCBI gene;Acc:100857227]	100857227	F1N8T2	GO:0006929//substrate-dependent cell migration;GO:0007155//cell adhesion;GO:0007160//cell-matrix adhesion;GO:0007229//integrin-mediated signaling pathway;GO:0031589//cell-substrate adhesion;GO:0033627//cell adhesion mediated by integrin;GO:0038065//collagen-activated signaling pathway;GO:0048333//mesodermal cell differentiation;GO:0007155//cell adhesion;	GO:0005886//plasma membrane;GO:0005925//focal adhesion;GO:0008305//integrin complex;GO:0009897//external side of plasma membrane;GO:0009986//cell surface;GO:0009986//cell surface;GO:0034666//integrin alpha2-beta1 complex;GO:0045178//basal part of cell;GO:0008305//integrin complex;	GO:0001540//amyloid-beta binding;GO:0005518//collagen binding;GO:0038064//collagen receptor activity;GO:0044877//protein-containing complex binding;GO:0098639//collagen binding involved in cell-matrix adhesion;	ko05414(Dilated cardiomyopathy);ko05412(Arrhythmogenic right ventricular cardiomyopathy);ko05410(Hypertrophic cardiomyopathy);ko05222(Small cell lung cancer);ko05205(Proteoglycans in cancer);ko05200(Pathways in cancer);ko05165(Human papillomavirus infection);ko04810(Regulation of actin cytoskeleton);ko04640(Hematopoietic cell lineage);ko04611(Platelet activation);ko04512(ECM-receptor interaction)…
ENSGALG00000005195	3202.37	2986.07	3418.67	1.14487	0.195186	0.0165088	0.684745	Nodiff	20	7793104	7823035	+	5431	OSBPL2	GO:0005829;GO:0006869;GO:0008289;GO:0008289;GO:0015248;GO:0015485;GO:0016020;GO:0032934;GO:0043231;GO:0120009;GO:0005829;GO:0006869;GO:0008289;GO:0008289;GO:0015248;GO:0015485;GO:0016020;GO:0032934;GO:0043231;GO:0120009;GO:0008289;GO:0008289;GO:0005829;GO:0006869;GO:0008289;GO:0008289;GO:0015248;GO:0015485;GO:0016020;GO:0032934;GO:0043231;GO:0120009;GO:0005546;GO:0005811;GO:0005829;GO:0005829;GO:…	K20174	-	T;K	KOG2209;39M84;3BI7M;3CSXD;4814Y;48Y7G;4GRNC	oxysterol binding protein like 2 [Source:NCBI gene;Acc:419227]	419227	Q5ZLC4	GO:0006869//lipid transport;GO:0120009//intermembrane lipid transfer;GO:0006869//lipid transport;GO:0120009//intermembrane lipid transfer;GO:0006869//lipid transport;GO:0120009//intermembrane lipid transfer;GO:0006869//lipid transport;GO:0007009//plasma membrane organization;GO:0015914//phospholipid transport;GO:0030301//cholesterol transport;GO:0032367//intracellular cholesterol transport;GO:005…	GO:0005829//cytosol;GO:0016020//membrane;GO:0043231//intracellular membrane-bounded organelle;GO:0005829//cytosol;GO:0016020//membrane;GO:0043231//intracellular membrane-bounded organelle;GO:0005829//cytosol;GO:0016020//membrane;GO:0043231//intracellular membrane-bounded organelle;GO:0005811//lipid droplet;GO:0005829//cytosol;GO:0005829//cytosol;GO:0016020//membrane;GO:0031234//extrinsic componen…	GO:0008289//lipid binding;GO:0008289//lipid binding;GO:0015248//sterol transporter activity;GO:0015485//cholesterol binding;GO:0032934//sterol binding;GO:0008289//lipid binding;GO:0008289//lipid binding;GO:0015248//sterol transporter activity;GO:0015485//cholesterol binding;GO:0032934//sterol binding;GO:0008289//lipid binding;GO:0008289//lipid binding;GO:0008289//lipid binding;GO:0008289//lipid b…	-
ENSGALG00000039811	1241.24	1130.2	1352.27	1.19648	0.258801	0.016522	0.684745	Nodiff	1	131761291	131775917	-	5505	NIPA1	GO:0015095;GO:0015693;GO:0016021;GO:0005769;GO:0005886;GO:0015095;GO:0015095;GO:0015693;GO:0015693;GO:0015693;GO:0015693;GO:0016020;GO:0016020;GO:0016021;GO:0016021;GO:0016021;GO:1903830;GO:0015095;GO:0015693;GO:0016021;	-	-	-	-	non imprinted in Prader-Willi/Angelman syndrome 1 [Source:NCBI gene;Acc:418681]	-	-	GO:0015693//magnesium ion transport;GO:0015693//magnesium ion transport;GO:0015693//magnesium ion transport;GO:0015693//magnesium ion transport;GO:0015693//magnesium ion transport;GO:1903830//magnesium ion transmembrane transport;GO:0015693//magnesium ion transport;	GO:0016021//integral component of membrane;GO:0005769//early endosome;GO:0005886//plasma membrane;GO:0016020//membrane;GO:0016020//membrane;GO:0016021//integral component of membrane;GO:0016021//integral component of membrane;GO:0016021//integral component of membrane;GO:0016021//integral component of membrane;	GO:0015095//magnesium ion transmembrane transporter activity;GO:0015095//magnesium ion transmembrane transporter activity;GO:0015095//magnesium ion transmembrane transporter activity;GO:0015095//magnesium ion transmembrane transporter activity;	-
ENSGALG00000048968	10.3633	4.77336	15.9533	3.34216	1.74078	0.0165539	0.684745	Up Regulation	9	13275632	13279522	+	246	-	GO:0000166;GO:0005524;GO:0006812;GO:0006812;GO:0006874;GO:0016020;GO:0016021;GO:0016021;GO:0016021;GO:0016887;GO:0016887;GO:0019829;GO:0019829;GO:0034220;GO:0046872;GO:0098655;	-	-	-	-	-	-	-	GO:0006812//cation transport;GO:0006812//cation transport;GO:0006874//cellular calcium ion homeostasis;GO:0034220//ion transmembrane transport;GO:0098655//cation transmembrane transport;	GO:0016020//membrane;GO:0016021//integral component of membrane;GO:0016021//integral component of membrane;GO:0016021//integral component of membrane;	GO:0000166//nucleotide binding;GO:0005524//ATP binding;GO:0016887//ATP hydrolysis activity;GO:0016887//ATP hydrolysis activity;GO:0019829//ATPase-coupled cation transmembrane transporter activity;GO:0019829//ATPase-coupled cation transmembrane transporter activity;GO:0046872//metal ion binding;	-
ENSGALG00000007740	619.148	673.726	564.571	0.837984	-0.255006	0.0165726	0.684745	Nodiff	4	12295203	12299978	-	1549	-	GO:0003779;GO:0005856;GO:0030036;	K06083	-	S;Z	KOG1830;38FJQ;3BBVV;3CRUH;488CM;498UE;4GR05	wiskott-Aldrich syndrome protein family member 3- like [Source:NCBI gene;Acc:422323]	422323	-	GO:0030036//actin cytoskeleton organization;	GO:0005856//cytoskeleton;	GO:0003779//actin binding;	ko05231(Choline metabolism in cancer);ko05132(Salmonella infection);ko05130(Pathogenic Escherichia coli infection);ko04666(Fc gamma R-mediated phagocytosis);ko04520(Adherens junction)
ENSGALG00000046740	180.405	203.829	156.98	0.770156	-0.376778	0.0168268	0.693455	Nodiff	22	1656470	1658948	+	1466	-	-	-	-	-	-	polysaccharide biosynthesis domain containing 1 [Source:NCBI gene;Acc:100858203]	-	-	-	-	-	-
ENSGALG00000053680	10.7478	6.01242	15.4832	2.5752	1.36469	0.0168947	0.694464	Up Regulation	1	48078828	48079139	-	312	HIST1H46L2	GO:0000786;GO:0000786;GO:0000786;GO:0003677;GO:0003677;GO:0003677;GO:0003677;GO:0005634;GO:0005654;GO:0005694;GO:0006334;GO:0006352;GO:0006352;GO:0046982;GO:0046982;	-	-	-	-	histone cluster 1, H4-IV, germinal H4-like 2 [Source:NCBI gene;Acc:100858049]	-	-	GO:0006334//nucleosome assembly;GO:0006352//DNA-templated transcription, initiation;GO:0006352//DNA-templated transcription, initiation;	GO:0000786//nucleosome;GO:0000786//nucleosome;GO:0000786//nucleosome;GO:0005634//nucleus;GO:0005654//nucleoplasm;GO:0005694//chromosome;	GO:0003677//DNA binding;GO:0003677//DNA binding;GO:0003677//DNA binding;GO:0003677//DNA binding;GO:0046982//protein heterodimerization activity;GO:0046982//protein heterodimerization activity;	-
ENSGALG00000000478	1770.32	1910.5	1630.13	0.853246	-0.228966	0.0169383	0.694472	Nodiff	27	4897150	5049377	+	6447	TANC2	GO:0005515;	-	-	S;I	KOG0504;38CMX;3BH8T;3CZ5V;483IX;48WTM;4GIYW	tetratricopeptide repeat, ankyrin repeat and coiled-coil containing 2 [Source:NCBI gene;Acc:419951]	-	-	-	-	GO:0005515//protein binding;	-
ENSGALG00000005985	59.2788	73.2121	45.3456	0.619373	-0.69112	0.0171236	0.700274	Nodiff	6	18850965	18862872	-	852	GDF10	GO:0005125;GO:0005576;GO:0005615;GO:0008083;GO:0008083;GO:0008083;GO:0010862;GO:0010862;GO:0045444;GO:0045668;GO:0060395;	K22674	-	M;T	KOG3900;38DMU;3BKR2;3D02R;47Z6H;494ZN;4GMRE	growth differentiation factor 10 [Source:HGNC Symbol;Acc:HGNC:4215]	423776	-	GO:0010862//positive regulation of pathway-restricted SMAD protein phosphorylation;GO:0010862//positive regulation of pathway-restricted SMAD protein phosphorylation;GO:0045444//fat cell differentiation;GO:0045668//negative regulation of osteoblast differentiation;GO:0060395//SMAD protein signal transduction;	GO:0005576//extracellular region;GO:0005615//extracellular space;	GO:0005125//cytokine activity;GO:0008083//growth factor activity;GO:0008083//growth factor activity;GO:0008083//growth factor activity;	ko04060(Cytokine-cytokine receptor interaction)
ENSGALG00000013646	345.83	310.708	380.952	1.22608	0.29405	0.0172566	0.703634	Nodiff	4	63129241	63148736	-	2508	VPS37A	GO:0000813;GO:0000813;GO:0005768;GO:0006612;GO:0006623;GO:0010008;GO:0015031;GO:0031902;GO:0043162;GO:0046907;GO:0000813;GO:0000813;GO:0000813;GO:0005654;GO:0005768;GO:0005813;GO:0005829;GO:0006612;GO:0006623;GO:0010008;GO:0015031;GO:0031902;GO:0043162;GO:0043162;GO:0043231;GO:0046907;	K12185	-	U	KOG3270;39U41;3BCVD;3D12W;488CK;4958Q;4GPQV	VPS37A, ESCRT-I subunit [Source:NCBI gene;Acc:422732]	422732	F1NVI1	GO:0006612//protein targeting to membrane;GO:0006623//protein targeting to vacuole;GO:0015031//protein transport;GO:0043162//ubiquitin-dependent protein catabolic process via the multivesicular body sorting pathway;GO:0046907//intracellular transport;GO:0006612//protein targeting to membrane;GO:0006623//protein targeting to vacuole;GO:0015031//protein transport;GO:0043162//ubiquitin-dependent pro…	GO:0000813//ESCRT I complex;GO:0000813//ESCRT I complex;GO:0005768//endosome;GO:0010008//endosome membrane;GO:0031902//late endosome membrane;GO:0000813//ESCRT I complex;GO:0000813//ESCRT I complex;GO:0000813//ESCRT I complex;GO:0005654//nucleoplasm;GO:0005768//endosome;GO:0005813//centrosome;GO:0005829//cytosol;GO:0010008//endosome membrane;GO:0031902//late endosome membrane;GO:0043231//intracel…	-	ko04144(Endocytosis)
ENSGALG00000009403	294.566	327.17	261.961	0.800687	-0.32069	0.0172938	0.703634	Nodiff	6	30989133	31145085	+	1773	GRK5	GO:0004672;GO:0004674;GO:0004674;GO:0004703;GO:0005524;GO:0005829;GO:0005886;GO:0006468;GO:0007165;GO:0007217;GO:0008284;GO:0016607;GO:0031965;GO:0043066;GO:0045444;GO:0046777;GO:0047696;GO:0051726;	K08291	EC:2.7.11.16	H;T	KOG0986;38DIH;3B9EJ;3CS7F;47ZDM;48YEX;4GMCB	G protein-coupled receptor kinase 5 [Source:NCBI gene;Acc:423929]	423929	-	GO:0006468//protein phosphorylation;GO:0007165//signal transduction;GO:0007217//tachykinin receptor signaling pathway;GO:0008284//positive regulation of cell population proliferation;GO:0043066//negative regulation of apoptotic process;GO:0045444//fat cell differentiation;GO:0046777//protein autophosphorylation;GO:0051726//regulation of cell cycle;	GO:0005829//cytosol;GO:0005886//plasma membrane;GO:0016607//nuclear speck;GO:0031965//nuclear membrane;	GO:0004672//protein kinase activity;GO:0004674//protein serine/threonine kinase activity;GO:0004674//protein serine/threonine kinase activity;GO:0004703//G protein-coupled receptor kinase activity;GO:0005524//ATP binding;GO:0047696//beta-adrenergic receptor kinase activity;	ko05032(Morphine addiction);ko04341(Hedgehog signaling pathway - fly);ko04144(Endocytosis);ko04062(Chemokine signaling pathway)
ENSGALG00000028439	225.399	198.836	251.963	1.26719	0.341632	0.0173609	0.703718	Nodiff	6	3395934	3435087	+	4114	SHLD2	GO:0005634;GO:0005694;GO:0035861;GO:0045830;GO:2000042;GO:2001034;	-	-	S	2QW94;38G31;3BI33;3CUUS;481CQ;493W5;4GKHF	family with sequence similarity 35 member A [Source:NCBI gene;Acc:423613]	423613	-	GO:0045830//positive regulation of isotype switching;GO:2000042//negative regulation of double-strand break repair via homologous recombination;GO:2001034//positive regulation of double-strand break repair via nonhomologous end joining;	GO:0005634//nucleus;GO:0005694//chromosome;GO:0035861//site of double-strand break;	-	-
ENSGALG00000028478	631.931	702.132	561.73	0.800035	-0.321865	0.0173839	0.703718	Nodiff	25	432852	440337	-	1344	CELF3	GO:0000381;GO:0003676;GO:0003723;GO:0003723;GO:0003723;GO:0005634;GO:0005634;GO:0005737;GO:0005737;GO:0007283;GO:0008380;GO:0016604;GO:0030317;GO:0030575;GO:0048026;GO:0097322;GO:0098781;	K13207	-	E;A	KOG0146;38FQ3;3BDXP;3CUQG;485KG;48VMT;4GQSX	CUGBP, Elav-like family member 3 [Source:NCBI gene;Acc:431347]	431347	-	GO:0000381//regulation of alternative mRNA splicing, via spliceosome;GO:0007283//spermatogenesis;GO:0008380//RNA splicing;GO:0030317//flagellated sperm motility;GO:0030575//nuclear body organization;GO:0048026//positive regulation of mRNA splicing, via spliceosome;GO:0098781//ncRNA transcription;	GO:0005634//nucleus;GO:0005634//nucleus;GO:0005737//cytoplasm;GO:0005737//cytoplasm;GO:0016604//nuclear body;	GO:0003676//nucleic acid binding;GO:0003723//RNA binding;GO:0003723//RNA binding;GO:0003723//RNA binding;GO:0097322//7SK snRNA binding;	-
ENSGALG00000032683	72.0149	85.9122	58.1175	0.676475	-0.563891	0.0175373	0.707426	Nodiff	2	62886571	62917186	+	1889	ADTRP	GO:0001934;GO:0002042;GO:0002686;GO:0003332;GO:0005901;GO:0009986;GO:0010628;GO:0016020;GO:0016021;GO:0016787;GO:0030195;GO:0042758;GO:0043491;GO:0050709;GO:0071383;GO:0140052;GO:1903038;GO:2000402;	-	-	-	-	androgen dependent TFPI regulating protein [Source:NCBI gene;Acc:771464]	771464	A0A1D5NVB8	GO:0001934//positive regulation of protein phosphorylation;GO:0002042//cell migration involved in sprouting angiogenesis;GO:0002686//negative regulation of leukocyte migration;GO:0003332//negative regulation of extracellular matrix constituent secretion;GO:0010628//positive regulation of gene expression;GO:0030195//negative regulation of blood coagulation;GO:0042758//long-chain fatty acid catabol…	GO:0005901//caveola;GO:0009986//cell surface;GO:0016020//membrane;GO:0016021//integral component of membrane;	GO:0016787//hydrolase activity;	-
ENSGALG00000052192	7774.85	8848.89	6700.81	0.757249	-0.40116	0.0176778	0.707426	Nodiff	33	7125098	7127729	+	1901	TUBA1B	GO:0000226;GO:0003725;GO:0003924;GO:0005200;GO:0005200;GO:0005525;GO:0005874;GO:0005874;GO:0005874;GO:0005881;GO:0007017;GO:0015630;GO:0031625;GO:0071353;	-	-	-	-	tubulin alpha-1A chain-like [Source:NCBI gene;Acc:100859737]	-	-	GO:0000226//microtubule cytoskeleton organization;GO:0007017//microtubule-based process;GO:0071353//cellular response to interleukin-4;	GO:0005874//microtubule;GO:0005874//microtubule;GO:0005874//microtubule;GO:0005881//cytoplasmic microtubule;GO:0015630//microtubule cytoskeleton;	GO:0003725//double-stranded RNA binding;GO:0003924//GTPase activity;GO:0005200//structural constituent of cytoskeleton;GO:0005200//structural constituent of cytoskeleton;GO:0005525//GTP binding;GO:0031625//ubiquitin protein ligase binding;	-
ENSGALG00000007685	514.32	561.098	467.542	0.833263	-0.263157	0.0177162	0.707426	Nodiff	24	5607649	5619306	-	5749	BCL9L	GO:0003713;GO:0005634;GO:0008013;GO:0008013;GO:0035019;GO:0035914;GO:0045944;GO:0060070;GO:0060070;GO:0003713;GO:0008013;GO:0060070;	K22649	-	S	2QR2B;39115;3BHB2;3D1EI;47ZFS;494Q0;4GQF3	B-cell CLL/lymphoma 9-like [Source:NCBI gene;Acc:419785]	419785	-	GO:0035019//somatic stem cell population maintenance;GO:0035914//skeletal muscle cell differentiation;GO:0045944//positive regulation of transcription by RNA polymerase II;GO:0060070//canonical Wnt signaling pathway;GO:0060070//canonical Wnt signaling pathway;GO:0060070//canonical Wnt signaling pathway;	GO:0005634//nucleus;	GO:0003713//transcription coactivator activity;GO:0008013//beta-catenin binding;GO:0008013//beta-catenin binding;GO:0003713//transcription coactivator activity;GO:0008013//beta-catenin binding;	-
ENSGALG00000013212	581.015	632.844	529.186	0.836203	-0.258075	0.0177269	0.707426	Nodiff	2	88684786	88736696	+	1135	-	GO:0005515;GO:0005515;	K23607	-	S	KOG3649;38I40;3BA8G;3CXD3;483RQ;48XHU;4GNUD	transmembrane protein with EGF-like and two follistatin-like domains 1 [Source:NCBI gene;Acc:420985]	420985	-	-	-	GO:0005515//protein binding;GO:0005515//protein binding;	-
ENSGALG00000026955	1128.07	1215.01	1041.12	0.856884	-0.222829	0.0177379	0.707426	Nodiff	28	3364129	3364725	+	597	DIRAS1	GO:0003924;GO:0003924;GO:0005525;GO:0005525;GO:0005886;GO:0007165;GO:0016020;	K07840	-	S;G	KOG0395;38C4W;3B9F2;3CSUU;480IB;490NI;4GPDB	DIRAS family GTPase 1 [Source:NCBI gene;Acc:100858997]	100858997	R4GLP1	GO:0007165//signal transduction;	GO:0005886//plasma membrane;GO:0016020//membrane;	GO:0003924//GTPase activity;GO:0003924//GTPase activity;GO:0005525//GTP binding;GO:0005525//GTP binding;	-
ENSGALG00000050637	6.15905	9.86211	2.456	0.249034	-2.00559	0.0177409	0.707426	Down Regulation	32	463888	464961	+	1074	-	GO:0002430;GO:0002684;GO:0004875;GO:0004875;GO:0004875;GO:0004878;GO:0004878;GO:0004878;GO:0004930;GO:0004930;GO:0004930;GO:0004930;GO:0005886;GO:0005886;GO:0006935;GO:0006935;GO:0006935;GO:0006954;GO:0007165;GO:0007186;GO:0007186;GO:0007186;GO:0007200;GO:0007204;GO:0016020;GO:0016021;GO:0016021;GO:0016021;GO:0031410;GO:0038178;GO:0048584;GO:0050794;	-	-	-	-	complement C5a receptor 1 [Source:NCBI gene;Acc:430484]	-	-	GO:0002430//complement receptor mediated signaling pathway;GO:0002684//positive regulation of immune system process;GO:0006935//chemotaxis;GO:0006935//chemotaxis;GO:0006935//chemotaxis;GO:0006954//inflammatory response;GO:0007165//signal transduction;GO:0007186//G protein-coupled receptor signaling pathway;GO:0007186//G protein-coupled receptor signaling pathway;GO:0007186//G protein-coupled rece…	GO:0005886//plasma membrane;GO:0005886//plasma membrane;GO:0016020//membrane;GO:0016021//integral component of membrane;GO:0016021//integral component of membrane;GO:0016021//integral component of membrane;GO:0031410//cytoplasmic vesicle;	GO:0004875//complement receptor activity;GO:0004875//complement receptor activity;GO:0004875//complement receptor activity;GO:0004878//complement component C5a receptor activity;GO:0004878//complement component C5a receptor activity;GO:0004878//complement component C5a receptor activity;GO:0004930//G protein-coupled receptor activity;GO:0004930//G protein-coupled receptor activity;GO:0004930//G p…	-
ENSGALG00000015466	49.7855	60.9918	38.5793	0.632533	-0.660788	0.0178329	0.709324	Nodiff	3	70959454	70999506	+	2758	SIM1	GO:0001657;GO:0003677;GO:0003700;GO:0005515;GO:0005634;GO:0006355;GO:0006355;GO:0046982;GO:0046983;	K09100	-	K	KOG3559;38EUS;3B9PC;3CRU4;484R7;48VVY;4GMEG	SIM bHLH transcription factor 1 [Source:NCBI gene;Acc:396129]	396129	E1C5G3	GO:0001657//ureteric bud development;GO:0006355//regulation of transcription, DNA-templated;GO:0006355//regulation of transcription, DNA-templated;	GO:0005634//nucleus;	GO:0003677//DNA binding;GO:0003700//DNA-binding transcription factor activity;GO:0005515//protein binding;GO:0046982//protein heterodimerization activity;GO:0046983//protein dimerization activity;	-
ENSGALG00000014096	371.4	327.34	415.46	1.2692	0.343922	0.0180415	0.715608	Nodiff	1	68130384	68166501	+	3955	ARNTL2	GO:0003700;GO:0005634;GO:0005667;GO:0005737;GO:0006355;GO:0046983;GO:0003700;GO:0005634;GO:0005667;GO:0005737;GO:0006355;GO:0046983;GO:0000978;GO:0000981;GO:0003700;GO:0003700;GO:0005634;GO:0005634;GO:0005654;GO:0005667;GO:0005730;GO:0005737;GO:0006355;GO:0006357;GO:0007623;GO:0042753;GO:0045893;GO:0045893;GO:0045944;GO:0046983;GO:0070888;GO:0070888;	K09099	-	K	KOG3561;39S78;3BG49;3CVPZ;4886V;497WU;4GNQU	aryl hydrocarbon receptor nuclear translocator-like 2 [Source:NCBI gene;Acc:373925]	373925	Q8QGQ7	GO:0006355//regulation of transcription, DNA-templated;GO:0006355//regulation of transcription, DNA-templated;GO:0006355//regulation of transcription, DNA-templated;GO:0006357//regulation of transcription by RNA polymerase II;GO:0007623//circadian rhythm;GO:0042753//positive regulation of circadian rhythm;GO:0045893//positive regulation of transcription, DNA-templated;GO:0045893//positive regulat…	GO:0005634//nucleus;GO:0005667//transcription regulator complex;GO:0005737//cytoplasm;GO:0005634//nucleus;GO:0005667//transcription regulator complex;GO:0005737//cytoplasm;GO:0005634//nucleus;GO:0005634//nucleus;GO:0005654//nucleoplasm;GO:0005667//transcription regulator complex;GO:0005730//nucleolus;GO:0005737//cytoplasm;	GO:0003700//DNA-binding transcription factor activity;GO:0046983//protein dimerization activity;GO:0003700//DNA-binding transcription factor activity;GO:0046983//protein dimerization activity;GO:0000978//RNA polymerase II cis-regulatory region sequence-specific DNA binding;GO:0000981//DNA-binding transcription factor activity, RNA polymerase II-specific;GO:0003700//DNA-binding transcription facto…	-
ENSGALG00000015156	368.033	318.43	417.635	1.31154	0.391266	0.0181514	0.715608	Nodiff	Z	36846475	36855645	-	2607	NMRK1	-	K10524	-	F	KOG3308;39X3K;3BKZM;3CW95;48B3S;48XD1;4GJVF	nicotinamide riboside kinase 1 [Source:NCBI gene;Acc:427257]	427257	-	-	-	-	ko00760(Nicotinate and nicotinamide metabolism)
ENSGALG00000014724	325.327	287.505	363.149	1.26311	0.336976	0.0181577	0.715608	Nodiff	Z	17517388	17555314	+	2951	-	GO:0003677;GO:0003723;GO:0005634;GO:0006351;GO:0045893;	-	-	K;S	2QR5W;39Q0M;3BGSZ;3CX4W;489U3;48Y3V;4GQKM	GC-rich promoter binding protein 1 [Source:NCBI gene;Acc:427148]	427148	E1C106	GO:0006351//transcription, DNA-templated;GO:0045893//positive regulation of transcription, DNA-templated;	GO:0005634//nucleus;	GO:0003677//DNA binding;GO:0003723//RNA binding;	-
ENSGALG00000034326	129.671	149.713	109.629	0.732261	-0.44957	0.018172	0.715608	Nodiff	2	42973622	42974929	+	1308	TMEM158	-	-	-	-	-	transmembrane protein 158 [Source:NCBI gene;Acc:776186]	776186	A0A1D5P3A5	-	-	-	-
ENSGALG00000014682	298.625	260.227	337.024	1.29512	0.373084	0.0182654	0.715608	Nodiff	Z	57223733	57284131	-	3118	CAST	GO:0005783;GO:0005829;GO:0010466;GO:0010859;GO:0016020;GO:0016020;GO:0097340;GO:2000675;	K04281	-	S	2RHIZ;39T03;3BKGJ;3CU9V;47ZRE;493MQ;4GI02	calpastatin [Source:NCBI gene;Acc:427121]	427121	B6V3I0	GO:0010466//negative regulation of peptidase activity;GO:0097340//inhibition of cysteine-type endopeptidase activity;GO:2000675//negative regulation of type B pancreatic cell apoptotic process;	GO:0005783//endoplasmic reticulum;GO:0005829//cytosol;GO:0016020//membrane;GO:0016020//membrane;	GO:0010859//calcium-dependent cysteine-type endopeptidase inhibitor activity;	ko05131(Shigellosis)
ENSGALG00000036990	748.308	683.311	813.306	1.19024	0.251254	0.0182931	0.715608	Nodiff	2	124297207	124306416	+	1242	DECR1	GO:0016491;GO:0005654;GO:0005739;GO:0005739;GO:0005829;GO:0006635;GO:0006635;GO:0008670;GO:0008670;GO:0016491;GO:0016491;GO:0042802;GO:0070402;GO:0120162;GO:1902494;	K13236	EC:1.3.1.124	-	-	2,4-dienoyl-CoA reductase 1, mitochondrial [Source:NCBI gene;Acc:420218]	420218	A0A1D5PD86	GO:0006635//fatty acid beta-oxidation;GO:0006635//fatty acid beta-oxidation;GO:0120162//positive regulation of cold-induced thermogenesis;	GO:0005654//nucleoplasm;GO:0005739//mitochondrion;GO:0005739//mitochondrion;GO:0005829//cytosol;GO:1902494//catalytic complex;	GO:0016491//oxidoreductase activity;GO:0008670//2,4-dienoyl-CoA reductase (NADPH) activity;GO:0008670//2,4-dienoyl-CoA reductase (NADPH) activity;GO:0016491//oxidoreductase activity;GO:0016491//oxidoreductase activity;GO:0042802//identical protein binding;GO:0070402//NADPH binding;	-
ENSGALG00000006505	616.067	556.369	675.764	1.2146	0.280477	0.0183042	0.715608	Nodiff	10	13022106	13071558	-	2176	ZFAND6	GO:0003677;GO:0008270;GO:0003677;GO:0006625;GO:0008270;GO:0031593;GO:0043066;GO:0043122;GO:0071356;GO:0003677;GO:0008270;GO:0003677;GO:0008270;GO:0003677;GO:0008270;	K24687	-	Q;S	KOG3173;39SYJ;3BF7H;3CW9E;486W9;493TP;4GSER	zinc finger AN1-type containing 6 [Source:NCBI gene;Acc:415483]	415483	E1BYN2	GO:0006625//protein targeting to peroxisome;GO:0043066//negative regulation of apoptotic process;GO:0043122//regulation of I-kappaB kinase/NF-kappaB signaling;GO:0071356//cellular response to tumor necrosis factor;	-	GO:0003677//DNA binding;GO:0008270//zinc ion binding;GO:0003677//DNA binding;GO:0008270//zinc ion binding;GO:0031593//polyubiquitin modification-dependent protein binding;GO:0003677//DNA binding;GO:0008270//zinc ion binding;GO:0003677//DNA binding;GO:0008270//zinc ion binding;GO:0003677//DNA binding;GO:0008270//zinc ion binding;	-
ENSGALG00000016379	2066.06	1921.82	2210.31	1.15011	0.201772	0.0183767	0.71669	Nodiff	1	120425336	120468539	-	2514	SMS	GO:0006596;GO:0006597;GO:0006597;GO:0006597;GO:0008215;GO:0009987;GO:0016740;GO:0016768;GO:0016768;GO:0016768;	K00802	EC:2.5.1.22	E	KOG1562;38D0W;3B9MG;3CYNW;4850M;496N1;4GN2F	spermine synthase [Source:NCBI gene;Acc:418602]	418602	Q5F3Z6	GO:0006596//polyamine biosynthetic process;GO:0006597//spermine biosynthetic process;GO:0006597//spermine biosynthetic process;GO:0006597//spermine biosynthetic process;GO:0008215//spermine metabolic process;GO:0009987//cellular process;	-	GO:0016740//transferase activity;GO:0016768//spermine synthase activity;GO:0016768//spermine synthase activity;GO:0016768//spermine synthase activity;	ko00480(Glutathione metabolism);ko00330(Arginine and proline metabolism);ko00270(Cysteine and methionine metabolism)
ENSGALG00000002536	828.842	763.941	893.743	1.16991	0.226399	0.0186688	0.724335	Nodiff	15	3215557	3505480	+	3950	STX2	GO:0007340;GO:0016020;GO:0016021;GO:0016192;GO:0030154;GO:0005484;GO:0006886;GO:0007340;GO:0016020;GO:0016021;GO:0016192;GO:0030154;GO:0005198;GO:0005484;GO:0005615;GO:0005886;GO:0006886;GO:0007340;GO:0016020;GO:0016021;GO:0016192;GO:0016323;GO:0030027;GO:0030154;GO:0032991;GO:0034599;GO:1903575;GO:0005484;GO:0005484;GO:0006886;GO:0006886;GO:0007340;GO:0007340;GO:0016020;GO:0016020;GO:0016020;GO:…	K08486	-	U	KOG0810;397YE;3BFJX;3CT7B;489ZN;491MM;4GPE5	syntaxin 2 [Source:NCBI gene;Acc:378895]	378895	Q5ZMT6	GO:0007340//acrosome reaction;GO:0016192//vesicle-mediated transport;GO:0030154//cell differentiation;GO:0006886//intracellular protein transport;GO:0007340//acrosome reaction;GO:0016192//vesicle-mediated transport;GO:0030154//cell differentiation;GO:0006886//intracellular protein transport;GO:0007340//acrosome reaction;GO:0016192//vesicle-mediated transport;GO:0030154//cell differentiation;GO:00…	GO:0016020//membrane;GO:0016021//integral component of membrane;GO:0016020//membrane;GO:0016021//integral component of membrane;GO:0005615//extracellular space;GO:0005886//plasma membrane;GO:0016020//membrane;GO:0016021//integral component of membrane;GO:0016323//basolateral plasma membrane;GO:0030027//lamellipodium;GO:0032991//protein-containing complex;GO:0016020//membrane;GO:0016020//membrane;…	GO:0005484//SNAP receptor activity;GO:0005198//structural molecule activity;GO:0005484//SNAP receptor activity;GO:0005484//SNAP receptor activity;GO:0005484//SNAP receptor activity;	ko04721(Synaptic vesicle cycle);ko04130(SNARE interactions in vesicular transport)
ENSGALG00000030710	318.585	360.021	277.15	0.769815	-0.377416	0.0187061	0.724335	Nodiff	20	79511	98048	-	2755	-	GO:0005515;GO:0005634;GO:0006355;GO:0008270;	K24387	-	-	-	l(3)mbt-like 1 (Drosophila) [Source:NCBI gene;Acc:419115]	419115	-	GO:0006355//regulation of transcription, DNA-templated;	GO:0005634//nucleus;	GO:0005515//protein binding;GO:0008270//zinc ion binding;	-
ENSGALG00000004710	1300.27	1198.06	1402.48	1.17063	0.227287	0.0187086	0.724335	Nodiff	10	9461198	9485282	-	2603	TMOD3	GO:0005523;GO:0005523;GO:0005523;GO:0005523;GO:0005856;GO:0005856;GO:0005865;GO:0005865;GO:0006936;GO:0007015;GO:0030016;GO:0030036;GO:0030036;GO:0030036;GO:0030239;GO:0048821;GO:0048821;GO:0048821;GO:0051694;GO:0051694;GO:1901992;	K10370	-	Z;T	KOG3735;38DPW;3B96P;3CXCH;486RS;48W7N;4GMCG	tropomodulin 3 [Source:NCBI gene;Acc:415421]	415421	Q5ZLY3	GO:0006936//muscle contraction;GO:0007015//actin filament organization;GO:0030036//actin cytoskeleton organization;GO:0030036//actin cytoskeleton organization;GO:0030036//actin cytoskeleton organization;GO:0030239//myofibril assembly;GO:0048821//erythrocyte development;GO:0048821//erythrocyte development;GO:0048821//erythrocyte development;GO:0051694//pointed-end actin filament capping;GO:0051694…	GO:0005856//cytoskeleton;GO:0005856//cytoskeleton;GO:0005865//striated muscle thin filament;GO:0005865//striated muscle thin filament;GO:0030016//myofibril;	GO:0005523//tropomyosin binding;GO:0005523//tropomyosin binding;GO:0005523//tropomyosin binding;GO:0005523//tropomyosin binding;	-
ENSGALG00000011244	163.411	184.356	142.466	0.772773	-0.371883	0.018778	0.725268	Nodiff	5	49134545	49144769	+	1784	DLK1	GO:0005509;GO:0005615;GO:0045746;	K24461	-	T;O	KOG1217;39US6;3BFH1;3CXZ0;48CQ1;48YA9;4GI74	delta like non-canonical Notch ligand 1 [Source:NCBI gene;Acc:423459]	423459	B7SFV6	GO:0045746//negative regulation of Notch signaling pathway;	GO:0005615//extracellular space;	GO:0005509//calcium ion binding;	-
ENSGALG00000010158	4175.4	3900.63	4450.17	1.14088	0.190152	0.018826	0.72537	Nodiff	Z	25835638	25933937	+	5414	KANK1	GO:0005515;GO:0005737;GO:0005886;GO:0008013;GO:0008283;GO:0010977;GO:0030036;GO:0030177;GO:0030336;GO:0030837;GO:0032587;GO:0035023;GO:0035024;GO:0046627;GO:0090263;GO:0090303;GO:0090521;GO:1900025;GO:1900028;GO:2000114;GO:2000393;GO:0005515;GO:0005515;GO:0005515;GO:0005515;	K22808	-	T;S	KOG0514;38FV8;3BFAU;3D1UU;480U3;493NX;4GNCH	KN motif and ankyrin repeat domains 1 [Source:NCBI gene;Acc:395475]	395475	-	GO:0008283//cell population proliferation;GO:0010977//negative regulation of neuron projection development;GO:0030036//actin cytoskeleton organization;GO:0030177//positive regulation of Wnt signaling pathway;GO:0030336//negative regulation of cell migration;GO:0030837//negative regulation of actin filament polymerization;GO:0035023//regulation of Rho protein signal transduction;GO:0035024//negati…	GO:0005737//cytoplasm;GO:0005886//plasma membrane;GO:0032587//ruffle membrane;	GO:0005515//protein binding;GO:0008013//beta-catenin binding;GO:0005515//protein binding;GO:0005515//protein binding;GO:0005515//protein binding;GO:0005515//protein binding;	-
ENSGALG00000050919	25.6497	12.0497	39.2498	3.25734	1.70369	0.0189118	0.726695	Up Regulation	9	13298124	13302585	+	1259	-	GO:0016020;GO:0016021;	-	-	-	-	-	-	-	-	GO:0016020//membrane;GO:0016021//integral component of membrane;	-	-
ENSGALG00000007912	2347.13	2506.96	2187.31	0.872495	-0.196781	0.0189513	0.726695	Nodiff	20	13107712	13155856	+	3241	ATP9A	GO:0000166;GO:0000287;GO:0002020;GO:0005215;GO:0005524;GO:0005768;GO:0005769;GO:0005802;GO:0005802;GO:0005886;GO:0015914;GO:0016021;GO:0031901;GO:0032588;GO:0048471;GO:0055037;GO:0055038;GO:0140326;GO:0140603;GO:1903542;GO:1905279;GO:2001135;	K01530	EC:7.6.2.1	P	KOG0210;38BSN;3BC32;3CTMK;484UR;48X44;4GHHV	ATPase phospholipid transporting 9A (putative) [Source:NCBI gene;Acc:419345]	419345	F1NUR8	GO:0015914//phospholipid transport;GO:1903542//negative regulation of exosomal secretion;GO:1905279//regulation of retrograde transport, endosome to Golgi;GO:2001135//regulation of endocytic recycling;	GO:0005768//endosome;GO:0005769//early endosome;GO:0005802//trans-Golgi network;GO:0005802//trans-Golgi network;GO:0005886//plasma membrane;GO:0016021//integral component of membrane;GO:0031901//early endosome membrane;GO:0032588//trans-Golgi network membrane;GO:0048471//perinuclear region of cytoplasm;GO:0055037//recycling endosome;GO:0055038//recycling endosome membrane;	GO:0000166//nucleotide binding;GO:0000287//magnesium ion binding;GO:0002020//protease binding;GO:0005215//transporter activity;GO:0005524//ATP binding;GO:0140326//ATPase-coupled intramembrane lipid transporter activity;GO:0140603//obsolete ATP hydrolysis activity;	-
ENSGALG00000000585	561.56	609.565	513.555	0.842493	-0.247263	0.0191826	0.731346	Nodiff	27	5250693	5256162	+	1182	MYL4	GO:0002026;GO:0003785;GO:0005509;GO:0031672;GO:0032781;GO:0051015;GO:0060048;	K12750	-	D;Z;T	KOG0030;38CU1;3BIWS;3CRXS;487D0;492K8;4GN8G	myosin, light chain 4, alkali; atrial, embryonic [Source:NCBI gene;Acc:396472]	396472	P09540	GO:0002026//regulation of the force of heart contraction;GO:0032781//positive regulation of ATP-dependent activity;GO:0060048//cardiac muscle contraction;	GO:0031672//A band;	GO:0003785//actin monomer binding;GO:0005509//calcium ion binding;GO:0051015//actin filament binding;	ko04371(Apelin signaling pathway);ko04261(Adrenergic signaling in cardiomyocytes);ko04260(Cardiac muscle contraction)
ENSGALG00000019284	785.108	721.484	848.733	1.17637	0.234343	0.01921	0.731346	Nodiff	1	62118528	62125904	-	1703	-	GO:0016491;GO:0047834;	K00011	EC:1.1.1.21	-	-	aldo-keto reductase family 1 member B10-like [Source:NCBI gene;Acc:418170]	418170	E1BVD1	-	-	GO:0016491//oxidoreductase activity;GO:0047834//D-threo-aldose 1-dehydrogenase activity;	ko00790(Folate biosynthesis);ko00561(Glycerolipid metabolism);ko00052(Galactose metabolism);ko00051(Fructose and mannose metabolism);ko00040(Pentose and glucuronate interconversions)
ENSGALG00000009442	528.548	480.599	576.497	1.19954	0.262481	0.0192143	0.731346	Nodiff	4	21928800	21947001	+	5293	ETFDH	GO:0004174;GO:0004174;GO:0004174;GO:0004174;GO:0004174;GO:0004174;GO:0005739;GO:0005743;GO:0006979;GO:0009055;GO:0016491;GO:0016491;GO:0016491;GO:0016491;GO:0022900;GO:0022900;GO:0022900;GO:0022900;GO:0022904;GO:0031305;GO:0031305;GO:0031966;GO:0033539;GO:0046872;GO:0048038;GO:0048039;GO:0051536;GO:0051539;GO:0051539;GO:0004174;GO:0016491;GO:0022900;	K00311	EC:1.5.5.1	C	KOG2415;38H8R;3BH2N;3CWV6;484PU;48WYX;4GT3M	electron transfer flavoprotein dehydrogenase [Source:NCBI gene;Acc:428724]	428724	Q5F3D8	GO:0006979//response to oxidative stress;GO:0022900//electron transport chain;GO:0022900//electron transport chain;GO:0022900//electron transport chain;GO:0022900//electron transport chain;GO:0022904//respiratory electron transport chain;GO:0033539//fatty acid beta-oxidation using acyl-CoA dehydrogenase;GO:0022900//electron transport chain;	GO:0005739//mitochondrion;GO:0005743//mitochondrial inner membrane;GO:0031305//integral component of mitochondrial inner membrane;GO:0031305//integral component of mitochondrial inner membrane;GO:0031966//mitochondrial membrane;	GO:0004174//electron-transferring-flavoprotein dehydrogenase activity;GO:0004174//electron-transferring-flavoprotein dehydrogenase activity;GO:0004174//electron-transferring-flavoprotein dehydrogenase activity;GO:0004174//electron-transferring-flavoprotein dehydrogenase activity;GO:0004174//electron-transferring-flavoprotein dehydrogenase activity;GO:0004174//electron-transferring-flavoprotein de…	-
ENSGALG00000001376	122.018	140.111	103.926	0.741736	-0.431023	0.0192889	0.731346	Nodiff	10	2941257	2966568	-	1777	ARID3B	GO:0003677;GO:0005654;GO:0045944;	-	-	K	KOG2744;38EPB;3B95H;3CU2G;48537;497CI;4GR83	AT-rich interaction domain 3B [Source:NCBI gene;Acc:100859297]	100859297	F1NL47;E7EL51	GO:0045944//positive regulation of transcription by RNA polymerase II;	GO:0005654//nucleoplasm;	GO:0003677//DNA binding;	-
ENSGALG00000043569	159.072	132.004	186.139	1.4101	0.495798	0.0193429	0.731346	Nodiff	13	15019063	15029058	+	2644	NME5	GO:0004550;GO:0004550;GO:0006165;GO:0006165;GO:0006183;GO:0006183;GO:0006228;GO:0006228;GO:0006241;GO:0006241;GO:0009987;GO:0048515;GO:0048515;GO:0004550;GO:0004550;GO:0006165;GO:0006165;GO:0006183;GO:0006183;GO:0006228;GO:0006228;GO:0006241;GO:0006241;GO:0009987;GO:0048515;GO:0048515;GO:0003351;GO:0004550;GO:0005929;GO:0006165;GO:0006183;GO:0006228;GO:0006241;GO:0007286;GO:0021591;GO:0036126;GO:…	K20790	-	-	-	NME/NM23 family member 5 [Source:NCBI gene;Acc:426732]	426732	-	GO:0006165//nucleoside diphosphate phosphorylation;GO:0006165//nucleoside diphosphate phosphorylation;GO:0006183//GTP biosynthetic process;GO:0006183//GTP biosynthetic process;GO:0006228//UTP biosynthetic process;GO:0006228//UTP biosynthetic process;GO:0006241//CTP biosynthetic process;GO:0006241//CTP biosynthetic process;GO:0009987//cellular process;GO:0048515//spermatid differentiation;GO:00485…	GO:0005929//cilium;GO:0036126//sperm flagellum;	GO:0004550//nucleoside diphosphate kinase activity;GO:0004550//nucleoside diphosphate kinase activity;GO:0004550//nucleoside diphosphate kinase activity;GO:0004550//nucleoside diphosphate kinase activity;GO:0004550//nucleoside diphosphate kinase activity;	-
ENSGALG00000029837	283.359	312.959	253.759	0.810837	-0.302516	0.0193515	0.731346	Nodiff	3	104460533	104460646	-	114	OST4	GO:0008250;GO:0018279;	-	-	-	-	oligosaccharyltransferase complex subunit 4, non- catalytic [Source:NCBI gene;Acc:100526758]	100526758	A0A1D5PXP1	GO:0018279//protein N-linked glycosylation via asparagine;	GO:0008250//oligosaccharyltransferase complex;	-	-
ENSGALG00000002655	1666.23	1521.64	1810.81	1.19004	0.251005	0.0194122	0.731346	Nodiff	7	1348987	1399109	-	5741	ITGAV	GO:0001525;GO:0001568;GO:0001846;GO:0001968;GO:0002020;GO:0005080;GO:0005178;GO:0005178;GO:0005245;GO:0005829;GO:0005886;GO:0005886;GO:0005925;GO:0007155;GO:0007155;GO:0007155;GO:0007155;GO:0007160;GO:0007229;GO:0007229;GO:0008284;GO:0008305;GO:0008305;GO:0008305;GO:0009897;GO:0009986;GO:0010745;GO:0010888;GO:0016020;GO:0016020;GO:0016021;GO:0016477;GO:0017134;GO:0019960;GO:0030335;GO:0031258;GO:…	K06487	-	W;M	KOG3637;38CFX;3B96W;3CUDX;47Z5E;48ZES;4GMTV	integrin subunit alpha V [Source:NCBI gene;Acc:396420]	396420	P26008	GO:0001525//angiogenesis;GO:0001568//blood vessel development;GO:0007155//cell adhesion;GO:0007155//cell adhesion;GO:0007155//cell adhesion;GO:0007155//cell adhesion;GO:0007160//cell-matrix adhesion;GO:0007229//integrin-mediated signaling pathway;GO:0007229//integrin-mediated signaling pathway;GO:0008284//positive regulation of cell population proliferation;GO:0010745//negative regulation of macr…	GO:0005829//cytosol;GO:0005886//plasma membrane;GO:0005886//plasma membrane;GO:0005925//focal adhesion;GO:0008305//integrin complex;GO:0008305//integrin complex;GO:0008305//integrin complex;GO:0009897//external side of plasma membrane;GO:0009986//cell surface;GO:0016020//membrane;GO:0016020//membrane;GO:0016021//integral component of membrane;GO:0031258//lamellipodium membrane;GO:0031527//filopod…	GO:0001846//opsonin binding;GO:0001968//fibronectin binding;GO:0002020//protease binding;GO:0005080//protein kinase C binding;GO:0005178//integrin binding;GO:0005178//integrin binding;GO:0005245//voltage-gated calcium channel activity;GO:0017134//fibroblast growth factor binding;GO:0019960//C-X3-C chemokine binding;GO:0031994//insulin-like growth factor I binding;GO:0038132//neuregulin binding;GO…	ko05418(Fluid shear stress and atherosclerosis);ko05414(Dilated cardiomyopathy);ko05412(Arrhythmogenic right ventricular cardiomyopathy);ko05410(Hypertrophic cardiomyopathy);ko05222(Small cell lung cancer);ko05205(Proteoglycans in cancer);ko05200(Pathways in cancer);ko05165(Human papillomavirus infection);ko05163(Human cytomegalovirus infection);ko04919(Thyroid hormone signaling pathway);ko04810(…
ENSGALG00000038639	157.944	178.654	137.233	0.768146	-0.380547	0.0194385	0.731346	Nodiff	3	104451464	104458538	+	1908	AGBL5	GO:0004181;GO:0004181;GO:0005634;GO:0005634;GO:0005737;GO:0005829;GO:0005829;GO:0006508;GO:0008270;GO:0015630;GO:0015631;GO:0030496;GO:0035608;GO:0035608;GO:0035609;GO:0035610;GO:0035611;GO:0045171;GO:0051607;GO:0072686;	-	-	-	-	ATP/GTP binding protein like 5 [Source:NCBI gene;Acc:770678]	-	-	GO:0006508//proteolysis;GO:0035608//protein deglutamylation;GO:0035608//protein deglutamylation;GO:0035609//C-terminal protein deglutamylation;GO:0035610//protein side chain deglutamylation;GO:0035611//protein branching point deglutamylation;GO:0051607//defense response to virus;	GO:0005634//nucleus;GO:0005634//nucleus;GO:0005737//cytoplasm;GO:0005829//cytosol;GO:0005829//cytosol;GO:0015630//microtubule cytoskeleton;GO:0030496//midbody;GO:0045171//intercellular bridge;GO:0072686//mitotic spindle;	GO:0004181//metallocarboxypeptidase activity;GO:0004181//metallocarboxypeptidase activity;GO:0008270//zinc ion binding;GO:0015631//tubulin binding;	-
ENSGALG00000029724	329.174	363.034	295.314	0.813461	-0.297856	0.019528	0.732989	Nodiff	2	41302040	41320388	-	1218	MTURN	GO:0005737;GO:0005737;GO:0032088;GO:0045654;GO:0046330;GO:0070374;	-	-	-	-	maturin, neural progenitor differentiation regulator homolog [Source:HGNC Symbol;Acc:HGNC:25457]	-	-	GO:0032088//negative regulation of NF-kappaB transcription factor activity;GO:0045654//positive regulation of megakaryocyte differentiation;GO:0046330//positive regulation of JNK cascade;GO:0070374//positive regulation of ERK1 and ERK2 cascade;	GO:0005737//cytoplasm;GO:0005737//cytoplasm;	-	-
ENSGALG00000017363	90.4469	74.9384	105.955	1.4139	0.499679	0.0195818	0.733284	Nodiff	11	7734011	7783037	+	3726	C11H16ORF87	-	-	-	S	2RY8J;3A1EV;3BPQ5;3CZB1;48AJC;4943K;4GP5S	chromosome 11 open reading frame, human C16orf87 [Source:NCBI gene;Acc:415747]	415747	A0A3Q3A8E8	-	-	-	-
ENSGALG00000002461	495.495	539.347	451.642	0.837387	-0.256033	0.0196602	0.734502	Nodiff	15	3014915	3017600	-	1241	-	GO:0004222;GO:0004222;GO:0006508;GO:0006508;GO:0008270;GO:0008270;	-	-	W;M;O	KOG1565;38CRR;3B9IY;3CT1E;4866C;4902C;4GNPR	-	-	-	GO:0006508//proteolysis;GO:0006508//proteolysis;	-	GO:0004222//metalloendopeptidase activity;GO:0004222//metalloendopeptidase activity;GO:0008270//zinc ion binding;GO:0008270//zinc ion binding;	-
ENSGALG00000013135	1769.93	1644.54	1895.32	1.15249	0.204758	0.0197109	0.734677	Nodiff	2	83799056	83873117	-	3482	GALNT1	GO:0004653;GO:0004653;GO:0005794;GO:0006493;GO:0006493;GO:0018242;GO:0018243;GO:0030145;GO:0048471;	K00710	EC:2.4.1.41	M;O	KOG3736;38FFX;3BAUJ;3CR92;485AZ;48VM4;4GTAV	polypeptide N-acetylgalactosaminyltransferase 1 [Source:NCBI gene;Acc:420955]	420955	Q5ZJL1	GO:0006493//protein O-linked glycosylation;GO:0006493//protein O-linked glycosylation;GO:0018242//protein O-linked glycosylation via serine;GO:0018243//protein O-linked glycosylation via threonine;	GO:0005794//Golgi apparatus;GO:0048471//perinuclear region of cytoplasm;	GO:0004653//polypeptide N-acetylgalactosaminyltransferase activity;GO:0004653//polypeptide N-acetylgalactosaminyltransferase activity;GO:0030145//manganese ion binding;	ko00514(Other types of O-glycan biosynthesis);ko00512(Mucin type O-glycan biosynthesis)
ENSGALG00000041081	188.982	165.845	212.119	1.27902	0.355035	0.01989	0.738813	Nodiff	Z	2087185	2131134	-	3125	C18orf25	-	-	-	-	-	chromosome Z open reading frame, human C18orf25 [Source:NCBI gene;Acc:416381]	-	-	-	-	-	-
ENSGALG00000004491	170.808	148.692	192.924	1.29747	0.3757	0.0199877	0.738813	Nodiff	Z	22452215	22497335	+	2711	DMGDH	GO:0005515;GO:0005739;GO:0016491;GO:0042426;GO:0047865;	K00315	EC:1.5.8.4	E	KOG2844;38DUF;3BESJ;3CZXJ;484PN;48WZR;4GHTH	dimethylglycine dehydrogenase [Source:NCBI gene;Acc:416370]	416370	E1BSV1	GO:0042426//choline catabolic process;	GO:0005739//mitochondrion;	GO:0005515//protein binding;GO:0016491//oxidoreductase activity;GO:0047865//dimethylglycine dehydrogenase activity;	ko00260(Glycine, serine and threonine metabolism)
ENSGALG00000049951	10424.1	11051.9	9796.26	0.886384	-0.173997	0.0200044	0.738813	Nodiff	6	12209119	12212113	+	1221	SPOCK2	GO:0005509;GO:0005509;GO:0005515;GO:0005539;GO:0010811;GO:0019800;GO:0030198;GO:0050840;GO:1990830;	-	-	-	-	SPARC/osteonectin, cwcv and kazal like domains proteoglycan 2 [Source:NCBI gene;Acc:100858414]	-	-	GO:0010811//positive regulation of cell-substrate adhesion;GO:0019800//peptide cross-linking via chondroitin 4-sulfate glycosaminoglycan;GO:0030198//extracellular matrix organization;GO:1990830//cellular response to leukemia inhibitory factor;	-	GO:0005509//calcium ion binding;GO:0005509//calcium ion binding;GO:0005515//protein binding;GO:0005539//glycosaminoglycan binding;GO:0050840//extracellular matrix binding;	-
ENSGALG00000043448	1791.59	1665.37	1917.81	1.15158	0.203612	0.0200282	0.738813	Nodiff	4	80649049	80786524	-	4125	ABLIM2	GO:0003779;GO:0006351;GO:0007010;GO:0030036;GO:0003779;GO:0006351;GO:0007010;GO:0030036;GO:0003779;GO:0006351;GO:0007010;GO:0015629;GO:0030036;GO:0003779;GO:0006351;GO:0007010;GO:0030036;GO:0003779;GO:0006351;GO:0007010;GO:0030036;GO:0003779;GO:0003779;GO:0005737;GO:0006351;GO:0006351;GO:0007010;GO:0007010;GO:0030036;GO:0030036;GO:0046872;GO:0110165;GO:0003779;GO:0006351;GO:0007010;GO:0030036;GO:…	K07520	-	-	-	actin binding LIM protein family member 2 [Source:NCBI gene;Acc:422866]	422866	-	GO:0006351//transcription, DNA-templated;GO:0007010//cytoskeleton organization;GO:0030036//actin cytoskeleton organization;GO:0006351//transcription, DNA-templated;GO:0007010//cytoskeleton organization;GO:0030036//actin cytoskeleton organization;GO:0006351//transcription, DNA-templated;GO:0007010//cytoskeleton organization;GO:0030036//actin cytoskeleton organization;GO:0006351//transcription, DNA…	GO:0015629//actin cytoskeleton;GO:0005737//cytoplasm;GO:0110165//cellular anatomical entity;GO:0005737//cytoplasm;GO:0110165//cellular anatomical entity;	GO:0003779//actin binding;GO:0003779//actin binding;GO:0003779//actin binding;GO:0003779//actin binding;GO:0003779//actin binding;GO:0003779//actin binding;GO:0003779//actin binding;GO:0046872//metal ion binding;GO:0003779//actin binding;GO:0003779//actin binding;GO:0003779//actin binding;GO:0046872//metal ion binding;	ko04360(Axon guidance)
ENSGALG00000010885	2026.74	1889.73	2163.76	1.14501	0.195356	0.0200528	0.738813	Nodiff	4	44872836	44933275	+	6791	BMP2K	GO:0004672;GO:0004672;GO:0004672;GO:0004674;GO:0005524;GO:0005524;GO:0005634;GO:0005634;GO:0005737;GO:0006468;GO:0006468;GO:0006468;GO:0016607;GO:0019208;GO:0019208;GO:0030500;GO:0030500;GO:0035612;GO:0045747;GO:0050790;GO:2000369;	K08854	EC:2.7.11.1	T;S	KOG1989;38GVM;3BD8F;3CZ8T;47Z4K;492DZ;4GHDV	BMP2 inducible kinase [Source:NCBI gene;Acc:422578]	422578	E1C764	GO:0006468//protein phosphorylation;GO:0006468//protein phosphorylation;GO:0006468//protein phosphorylation;GO:0030500//regulation of bone mineralization;GO:0030500//regulation of bone mineralization;GO:0045747//positive regulation of Notch signaling pathway;GO:0050790//regulation of catalytic activity;GO:2000369//regulation of clathrin-dependent endocytosis;	GO:0005634//nucleus;GO:0005634//nucleus;GO:0005737//cytoplasm;GO:0016607//nuclear speck;	GO:0004672//protein kinase activity;GO:0004672//protein kinase activity;GO:0004672//protein kinase activity;GO:0004674//protein serine/threonine kinase activity;GO:0005524//ATP binding;GO:0005524//ATP binding;GO:0019208//phosphatase regulator activity;GO:0019208//phosphatase regulator activity;GO:0035612//AP-2 adaptor complex binding;	ko05202(Transcriptional misregulation in cancer)
ENSGALG00000021688	335.288	301.609	368.968	1.22333	0.290819	0.0202154	0.743088	Nodiff	28	985592	989803	+	1597	CD320	GO:0005515;GO:0005515;	-	-	-	-	CD320 molecule [Source:NCBI gene;Acc:420066]	-	-	-	-	GO:0005515//protein binding;GO:0005515//protein binding;	-
ENSGALG00000009586	54.0776	42.8413	65.3139	1.52455	0.608388	0.0203696	0.744812	Nodiff	1	30191199	30202651	+	2593	IRAK4	GO:0000166;GO:0000287;GO:0000287;GO:0004672;GO:0004672;GO:0004674;GO:0004674;GO:0004674;GO:0004674;GO:0005524;GO:0005524;GO:0005524;GO:0005634;GO:0005737;GO:0005737;GO:0005886;GO:0006468;GO:0006468;GO:0007165;GO:0007165;GO:0016301;GO:0016310;GO:0016740;GO:0019221;GO:0035556;GO:0043123;GO:0043123;GO:0045087;GO:0106310;GO:0106311;GO:0106311;	K04733	EC:2.7.11.1	-	-	interleukin 1 receptor associated kinase 4 [Source:NCBI gene;Acc:417796]	417796	Q5ZJM6	GO:0006468//protein phosphorylation;GO:0006468//protein phosphorylation;GO:0007165//signal transduction;GO:0007165//signal transduction;GO:0016310//phosphorylation;GO:0019221//cytokine-mediated signaling pathway;GO:0035556//intracellular signal transduction;GO:0043123//positive regulation of I-kappaB kinase/NF-kappaB signaling;GO:0043123//positive regulation of I-kappaB kinase/NF-kappaB signaling…	GO:0005634//nucleus;GO:0005737//cytoplasm;GO:0005737//cytoplasm;GO:0005886//plasma membrane;	GO:0000166//nucleotide binding;GO:0000287//magnesium ion binding;GO:0000287//magnesium ion binding;GO:0004672//protein kinase activity;GO:0004672//protein kinase activity;GO:0004674//protein serine/threonine kinase activity;GO:0004674//protein serine/threonine kinase activity;GO:0004674//protein serine/threonine kinase activity;GO:0004674//protein serine/threonine kinase activity;GO:0005524//ATP …	ko05417(Lipid and atherosclerosis);ko05171(Coronavirus disease - COVID-19);ko05170(Human immunodeficiency virus 1 infection);ko05169(Epstein-Barr virus infection);ko05168(Herpes simplex virus 1 infection);ko05164(Influenza A);ko05162(Measles);ko05161(Hepatitis B);ko05152(Tuberculosis);ko05145(Toxoplasmosis);ko05142(Chagas disease);ko05140(Leishmaniasis);ko05135(Yersinia infection);ko05133(Pertuss…
ENSGALG00000042051	2026.97	2165.94	1887.99	0.87167	-0.198146	0.0204015	0.744812	Nodiff	2	3969529	4022831	-	7789	SETD2	GO:0005515;GO:0005634;GO:0005694;GO:0006355;GO:0010452;GO:0016279;GO:0018024;GO:0034968;GO:0046975;GO:0097198;GO:0001525;GO:0001570;GO:0001763;GO:0001843;GO:0005515;GO:0005634;GO:0005634;GO:0005694;GO:0005694;GO:0006298;GO:0006355;GO:0006368;GO:0010452;GO:0010452;GO:0010468;GO:0010569;GO:0010793;GO:0016279;GO:0016279;GO:0018023;GO:0018023;GO:0018024;GO:0018024;GO:0018026;GO:0030900;GO:0032465;GO:…	K11423	EC:2.1.1.359	-	-	SET domain containing 2 [Source:NCBI gene;Acc:420404]	420404	-	GO:0006355//regulation of transcription, DNA-templated;GO:0010452//histone H3-K36 methylation;GO:0034968//histone lysine methylation;GO:0097198//histone H3-K36 trimethylation;GO:0001525//angiogenesis;GO:0001570//vasculogenesis;GO:0001763//morphogenesis of a branching structure;GO:0001843//neural tube closure;GO:0006298//mismatch repair;GO:0006355//regulation of transcription, DNA-templated;GO:000…	GO:0005634//nucleus;GO:0005694//chromosome;GO:0005634//nucleus;GO:0005634//nucleus;GO:0005694//chromosome;GO:0005694//chromosome;	GO:0005515//protein binding;GO:0016279//protein-lysine N-methyltransferase activity;GO:0018024//histone-lysine N-methyltransferase activity;GO:0046975//histone methyltransferase activity (H3-K36 specific);GO:0005515//protein binding;GO:0016279//protein-lysine N-methyltransferase activity;GO:0016279//protein-lysine N-methyltransferase activity;GO:0018024//histone-lysine N-methyltransferase activit…	ko00310(Lysine degradation)
ENSGALG00000006833	109.799	75.077	144.521	1.92497	0.94484	0.020402	0.744812	Nodiff	1	4774156	4799281	+	2914	ITIH2	GO:0004867;GO:0005540;GO:0030212;	K19015	-	S	2QPS2;38C6V;3BE0X;3CW49;48A1Z;49623;4GJUN	inter-alpha-trypsin inhibitor heavy chain 2 [Source:NCBI gene;Acc:419110]	419110	B3VE14	GO:0030212//hyaluronan metabolic process;	-	GO:0004867//serine-type endopeptidase inhibitor activity;GO:0005540//hyaluronic acid binding;	-
ENSGALG00000011419	78.8144	92.6329	64.9958	0.70165	-0.511177	0.0205548	0.745051	Nodiff	4	49367971	49372172	+	1451	DUSP4	GO:0004725;GO:0004725;GO:0005634;GO:0005654;GO:0006470;GO:0008138;GO:0008330;GO:0016311;GO:0016311;GO:0016791;GO:0016791;GO:0017017;GO:0070373;GO:1990439;	K04459	-	V;T	KOG1716;39R4X;3BJGF;3CYQ2;487WF;490QI;4GM70	dual specificity phosphatase 4 [Source:NCBI gene;Acc:395642]	395642	Q9PW71	GO:0006470//protein dephosphorylation;GO:0016311//dephosphorylation;GO:0016311//dephosphorylation;GO:0070373//negative regulation of ERK1 and ERK2 cascade;	GO:0005634//nucleus;GO:0005654//nucleoplasm;	GO:0004725//protein tyrosine phosphatase activity;GO:0004725//protein tyrosine phosphatase activity;GO:0008138//protein tyrosine/serine/threonine phosphatase activity;GO:0008330//protein tyrosine/threonine phosphatase activity;GO:0016791//phosphatase activity;GO:0016791//phosphatase activity;GO:0017017//MAP kinase tyrosine/serine/threonine phosphatase activity;GO:1990439//MAP kinase serine/threon…	ko04361(Axon regeneration);ko04010(MAPK signaling pathway)
ENSGALG00000054753	1225.98	1315.31	1136.65	0.864167	-0.210619	0.0207688	0.745051	Nodiff	27	1900324	1960848	-	3098	-	GO:0006464;GO:0008641;GO:0006464;GO:0008641;GO:0006464;GO:0008641;GO:0008641;GO:0006464;GO:0008641;	-	-	-	-	ubiquitin-like modifier-activating enzyme 1 [Source:NCBI gene;Acc:107051050]	-	-	GO:0006464//cellular protein modification process;GO:0006464//cellular protein modification process;GO:0006464//cellular protein modification process;GO:0006464//cellular protein modification process;	-	GO:0008641//ubiquitin-like modifier activating enzyme activity;GO:0008641//ubiquitin-like modifier activating enzyme activity;GO:0008641//ubiquitin-like modifier activating enzyme activity;GO:0008641//ubiquitin-like modifier activating enzyme activity;GO:0008641//ubiquitin-like modifier activating enzyme activity;	-
ENSGALG00000038520	281.44	311.243	251.638	0.808493	-0.306692	0.0209318	0.745051	Nodiff	1	1393886	1407780	+	2796	STRIP2	GO:0005737;GO:0005829;GO:0007010;GO:0008360;GO:0016477;	-	-	-	-	striatin interacting protein 2 [Source:NCBI gene;Acc:416676]	416676	A0A1D5P3D4	GO:0007010//cytoskeleton organization;GO:0008360//regulation of cell shape;GO:0016477//cell migration;	GO:0005737//cytoplasm;GO:0005829//cytosol;	-	-
ENSGALG00000008858	10622.5	9955.4	11289.6	1.13402	0.181449	0.0209329	0.745051	Nodiff	3	10131713	10143027	+	2317	MDH1	GO:0003824;GO:0005975;GO:0006108;GO:0016491;GO:0016615;GO:0016616;GO:0030060;GO:0003824;GO:0005975;GO:0006108;GO:0016491;GO:0016615;GO:0016616;GO:0030060;	K00025	EC:1.1.1.37	C	KOG1496;38G9H;3BCK0;3CV2Y;47ZK3;497CQ;4GMXM	malate dehydrogenase 1 [Source:NCBI gene;Acc:421281]	421281	Q5ZME2	GO:0005975//carbohydrate metabolic process;GO:0006108//malate metabolic process;GO:0005975//carbohydrate metabolic process;GO:0006108//malate metabolic process;	-	GO:0003824//catalytic activity;GO:0016491//oxidoreductase activity;GO:0016615//malate dehydrogenase activity;GO:0016616//oxidoreductase activity, acting on the CH-OH group of donors, NAD or NADP as acceptor;GO:0030060//L-malate dehydrogenase activity;GO:0003824//catalytic activity;GO:0016491//oxidoreductase activity;GO:0016615//malate dehydrogenase activity;GO:0016616//oxidoreductase activity, ac…	ko04964(Proximal tubule bicarbonate reclamation);ko00710(Carbon fixation in photosynthetic organisms);ko00630(Glyoxylate and dicarboxylate metabolism);ko00620(Pyruvate metabolism);ko00270(Cysteine and methionine metabolism);ko00020(Citrate cycle (TCA cycle))
ENSGALG00000036589	639.877	694.986	584.769	0.841412	-0.249117	0.020948	0.745051	Nodiff	4	89326506	89392084	-	1627	GFRA4	GO:0038023;GO:0038023;GO:0038023;	K19895	-	-	-	GDNF family receptor alpha 4 [Source:NCBI gene;Acc:395839]	395839	O93512	-	-	GO:0038023//signaling receptor activity;GO:0038023//signaling receptor activity;GO:0038023//signaling receptor activity;	-
ENSGALG00000002421	1276.06	1178.7	1373.42	1.1652	0.22058	0.0210131	0.745051	Nodiff	6	5107187	5115923	-	1606	FAM213A	GO:0005737;GO:0005737;GO:0016020;GO:0016021;GO:0016209;GO:0016209;GO:0016209;GO:0098869;GO:0016209;	-	-	-	-	family with sequence similarity 213 member A [Source:NCBI gene;Acc:423625]	423625	Q5ZI34;A0A0F6YFH3	GO:0098869//cellular oxidant detoxification;	GO:0005737//cytoplasm;GO:0005737//cytoplasm;GO:0016020//membrane;GO:0016021//integral component of membrane;	GO:0016209//antioxidant activity;GO:0016209//antioxidant activity;GO:0016209//antioxidant activity;GO:0016209//antioxidant activity;	-
ENSGALG00000041428	549.615	501.732	597.497	1.19087	0.252014	0.0210204	0.745051	Nodiff	12	1184932	1201802	-	2774	NEK4	GO:0000278;GO:0004672;GO:0005524;GO:0005829;GO:0006468;GO:0006974;GO:0045893;GO:2000772;GO:2001020;GO:0004672;GO:0005524;GO:0006468;	K08857	EC:2.7.11.1	-	-	NIMA related kinase 4 [Source:NCBI gene;Acc:415900]	415900	-	GO:0000278//mitotic cell cycle;GO:0006468//protein phosphorylation;GO:0006974//cellular response to DNA damage stimulus;GO:0045893//positive regulation of transcription, DNA-templated;GO:2000772//regulation of cellular senescence;GO:2001020//regulation of response to DNA damage stimulus;GO:0006468//protein phosphorylation;	GO:0005829//cytosol;	GO:0004672//protein kinase activity;GO:0005524//ATP binding;GO:0004672//protein kinase activity;GO:0005524//ATP binding;	-
ENSGALG00000042840	749.843	656.348	843.337	1.28489	0.361649	0.0210479	0.745051	Nodiff	2	124252530	124264647	+	3710	OSGIN2	-	-	-	-	-	oxidative stress induced growth inhibitor family member 2 [Source:NCBI gene;Acc:420217]	420217	-	-	-	-	-
ENSGALG00000011341	415.299	376.993	453.605	1.20322	0.266898	0.0210492	0.745051	Nodiff	3	42501436	42522334	+	2039	UNC93A	GO:0005886;	-	-	S	KOG3097;39NH3;3BCBB;3CYBR;487S8;490PJ;4GK2F	unc-93 homolog A (C. elegans) [Source:NCBI gene;Acc:421566]	421566	F1NVP3	-	GO:0005886//plasma membrane;	-	-
ENSGALG00000032843	385.405	431.159	339.651	0.787763	-0.344166	0.0210521	0.745051	Nodiff	33	7355723	7362680	-	2512	AAAS	GO:0005515;	-	-	-	-	aladin WD repeat nucleoporin [Source:NCBI gene;Acc:100859661]	-	-	-	-	GO:0005515//protein binding;	-
ENSGALG00000051589	28.8613	37.0085	20.7141	0.559711	-0.837246	0.0210785	0.745051	Nodiff	20	9512903	9513434	+	532	-	GO:0005179;GO:0005576;	-	-	-	-	-	-	-	-	GO:0005576//extracellular region;	GO:0005179//hormone activity;	-
[truncated: 15,541 more rows]

## Sheet: Table 3. 28d data
id	baseMean	baseMean_d28_L	baseMean_d28_H	foldChange(d28_H/d28_L)(d28_H/d28_L)	log2FoldChange	pval	padj	Regulation	Chromosome	Start Site	End Site	Direction	Length	Name	GO	KEGG	EC	eggNOG Class	eggNOG	Description	Entrez_geneID	UniProtAC	BP	CC	MF	Pathway
[truncated: 16,007 more rows]

## Sheet: Table 4. 35d data
id	baseMean	baseMean_d35_L	baseMean_d35_H	foldChange(d35_H/d35_L)(d35_H/d35_L)	log2FoldChange	pval	padj	Regulation	Chromosome	Start Site	End Site	Direction	Length	Name	GO	KEGG	EC	eggNOG Class	eggNOG	Description	Entrez_geneID	UniProtAC	BP	CC	MF	Pathway
[truncated: 15,976 more rows]

## Sheet: Table 5. 42d data
id	baseMean	baseMean_d42_L	baseMean_d42_H	foldChange(d42_H/d42_L)(d42_H/d42_L)	log2FoldChange	pval	padj	Regulation	Chromosome	Start Site	End Site	Direction	Length	Name	GO	KEGG	EC	eggNOG Class	eggNOG	Description	Entrez_geneID	UniProtAC	BP	CC	MF	Pathway
[truncated: 15,986 more rows]

## Sheet: Table 6. data
D21_vs_D28	D21_vs_D35	D21_vs_D42
[truncated: 92 more rows]

## Sheet: table 7. DEGs
D21_vs_D28	D21_vs_D35	D21_vs_D42
[truncated: 92 more rows]

[truncated: 1 more sheets: Table 8. diff all groups]
